# Supplementary material for: Rhodium-catalyzed [2+2+2] cycloaddition of various fluorine-containing alkynes—novel synthesis of multi-substituted fluoroalkylated aromatic compounds
Source: Royal Society of Chemistry journal article supplement (doi:10.1039/b926192c), 2010-01-01

# Supplementary Information

## **Rhodium-catalyzed [2+2+2] Cyclization of Various Fluorine-containing Alkynes –Novel Synthesis of Multi-substituted Fluoroalkylated Aromatic Compounds–**

Tsutomu Konno,\* Kazuki Moriyasu, Ryoko Kinugawa, and Takashi Ishihara

*Department of Chemistry and Materials Technology, Kyoto Institute of Technology,*

*Matsugasaki, Sakyo-ku, Kyoto 606-8585, Japan. Fax: 81-75-724-7580; Tel: 81-75-724-7573;*

E-mail: konno@chem.kit.ac.jp

Infrared spectra (IR) were taken on a JASCO FT/IR-4100typeA spectrometer as film on a NaCl plate.  $^1\text{H}$  and  $^{13}\text{C}$  NMR spectra were measured with a JEOL JNM-AL 400 NMR spectrometer in a chloroform-*d* ( $\text{CDCl}_3$ ) solution with tetramethylsilane ( $\text{Me}_4\text{Si}$ ) as an internal reference. A JEOL JNM-EX90A (84.21 MHz) FT-NMR spectrometer and a JEOL JNM-AL 400 NMR spectrometer were used for determining the yield of the products with hexafluorobenzene ( $\text{C}_6\text{F}_6$ ).  $^{19}\text{F}$  NMR (376.05 MHz) spectra was measured with a JEOL JNM-AL 400 NMR spectrometer in a chloroform-*d* ( $\text{CDCl}_3$ ) solution with trichlorofluoromethane ( $\text{CFCl}_3$ ) as an internal standard. High-resolution mass spectra (HRMS) were taken on a Hitachi M-80B mass spectrometer by electron impact (EI), chemical ionization (CI), and fast atom bombardment (FAB) methods.

All chemicals were of reagent grade and, if necessary, were purified in the usual manner prior to use. Thin-layer chromatography (TLC) was done on aluminium sheets coated with Merck silica gel 60 F<sub>254</sub> plates, and column chromatography was carried out using Wacogel C-200 as adsorbent.

### General procedure for the trimerization of fluoroalkylated alkynes

To a suspension of  $\text{RhCl}_3 \cdot 3\text{H}_2\text{O}$  (13 mg, 0.05 mmol) in toluene (1.0 mL) were added *i*-Pr<sub>2</sub>NEt (24 mg, 0.15 mmol) and fluoroalkylated alkynes (0.50 mmol), and then the mixture was stirred at the reflux temperature for 18 h. After being cooled to room temperature, the residue was purified by column chromatography on silica gel (EtOAc/Hexane) to afford the corresponding fluoroalkylated benzene derivatives.

### 3,5,6-Tris(4-chlorophenyl)-1,2,4-tris(trifluoromethyl)benzene (**2a**) and 2,4,6-Tris(4-chlorophenyl)-1,3,5-tris(trifluoromethyl)benzene (**3a**)

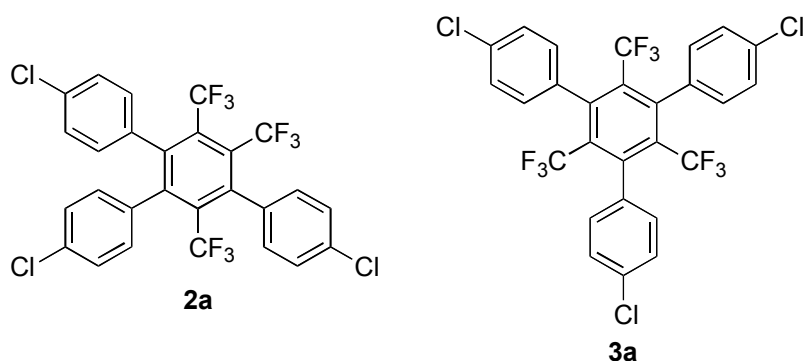

Combined yield : 85% ( $^{19}\text{F}$  NMR yield), 75% (isolated yield); Isomeric ratio (**2a** : **3a**) = 84:16 (inseparable); HRMS (FAB) calcd for ( $\text{M}^+$ )  $\text{C}_{27}\text{H}_{12}\text{ClF}_9$ : 611.9874, Found 611.9861;  $^1\text{H}$  NMR ( $\text{CDCl}_3$ )  $\delta$  = 6.87 ~ 7.43 (m, 12H); **2a** :  $^{19}\text{F}$  NMR ( $\text{CDCl}_3$ )  $\delta$  = -51.52 (q,  $J$  = 16.2 Hz, 3F), -50.27 (q,  $J$  = 16.2 Hz, 3F), -48.36 (s, 3F); **3a** :  $^{19}\text{F}$  NMR ( $\text{CDCl}_3$ )  $\delta$  = -46.76 (s, 9F).

**1,2,4-Tris(trifluoromethyl)-3,5,6-triphenylbenzene (2b)** and

**1,3,5-Tris(trifluoromethyl)-2,4,6-triphenylbenzene (3b)**

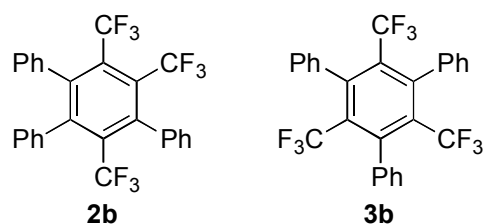

Combined yield : 69% ( $^{19}\text{F}$  NMR yield), 65% (isolated yield); Isomeric ratio (**2b** : **3b**) = 81:19 (inseparable); HRMS (FAB) calcd for ( $\text{M}^+$ )  $\text{C}_{27}\text{H}_{15}\text{F}_9$ : 510.1042, Found 510.1030;  $^1\text{H}$  NMR ( $\text{CDCl}_3$ )  $\delta$  = 6.95 ~ 7.46 (m, 15H); **2b** :  $^{19}\text{F}$  NMR ( $\text{CDCl}_3$ )  $\delta$  = -51.48 (q,  $J$  = 16.2 Hz, 3F), -50.22 (q,  $J$  = 16.2 Hz, 3F), -48.42 (s, 3F); **3b** :  $^{19}\text{F}$  NMR ( $\text{CDCl}_3$ )  $\delta$  = 46.85 (s, 9F).

**1,2,4-Tris(trifluoromethyl)-3,5,6-tris(4-methoxyphenyl)benzene (2c)** and

**1,3,5-Tris(trifluoromethyl)-2,4,6-tris(4-methoxyphenyl)benzene (3c)**

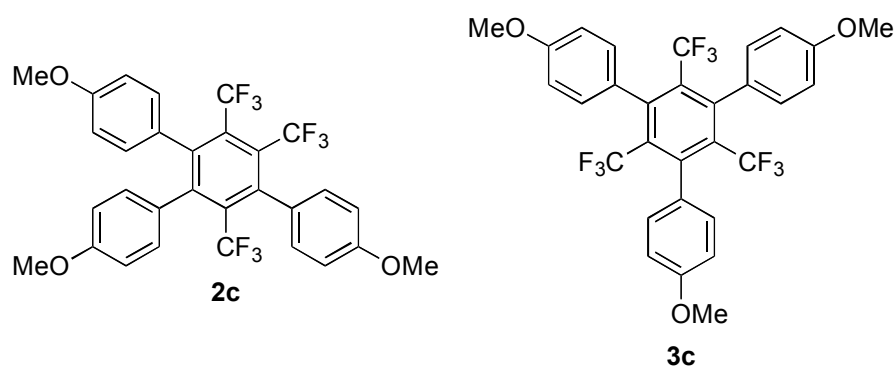

Combined yield : 92% ( $^{19}\text{F}$  NMR yield), 90% (isolated yield); Isomeric ratio (**2c** : **3c**) = 84:16 (inseparable); HRMS (FAB) calcd for ( $\text{M}^+$ )  $\text{C}_{30}\text{H}_{21}\text{F}_9\text{O}_3$ : 600.1337, Found 600.1347; **2c** :  $^1\text{H}$  NMR ( $\text{CDCl}_3$ )  $\delta$  = 3.73 (s, 3H), 3.74 (s, 3H), 3.84 (s, 3H), 3.87 (s, 3H), 6.34 ~ 6.67 (m, 4H), 6.85 ~ 6.96 (m, 8H);  $^{19}\text{F}$  NMR ( $\text{CDCl}_3$ )  $\delta$  = -51.63 (q,  $J$  = 16.3 Hz, 3F), -50.38 (q,  $J$  = 16.3 Hz, 3F), -48.64 (s, 3F); **3c** :  $^1\text{H}$  NMR ( $\text{CDCl}_3$ )  $\delta$  = 3.73 (s, 3H), 3.74 (s, 3H), 3.84 (s, 3H), 3.87 (s, 3H), 7.18 ~ 7.28 (m, 12H);  $^{19}\text{F}$  NMR ( $\text{CDCl}_3$ )  $\delta$  = -47.05 (s, 9F).

**3,5,6-Tris(4-ethoxycarbonylphenyl)-1,2,4-tris(trifluoromethyl)benzene (2d)** and  
**2,4,6-Tris(4-ethoxycarbonylphenyl)-1,3,5-tris(trifluoromethyl)benzene (3d)**

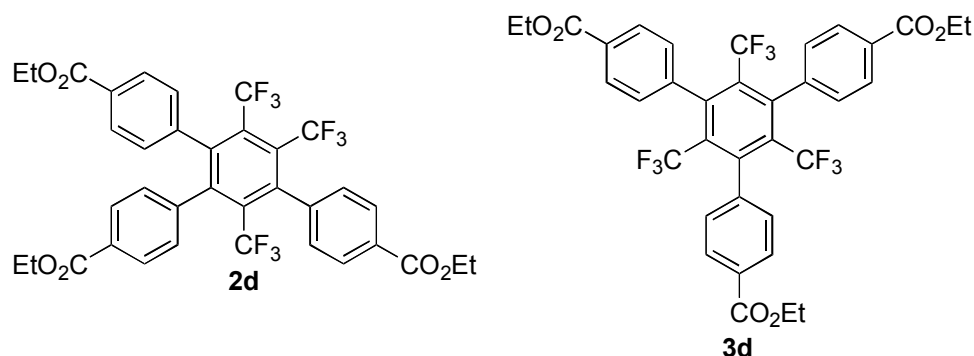

Combined yield : 68% ( $^{19}\text{F}$  NMR yield), 67% (isolated yield); Isomeric ratio (**2d** : **3d**) = 84:16 (inseparable); HRMS (FAB) calcd for ( $\text{M}+\text{H}$ )  $\text{C}_{36}\text{H}_{28}\text{F}_9\text{O}_6$ : 727.1732, Found 727.1742; **2d** :  $^1\text{H}$  NMR ( $\text{CDCl}_3$ )  $\delta$  = 1.35 ~ 1.45 (m, 9H), 4.30 ~ 4.43 (m, 6H), 7.06 ~ 7.11 (m, 4H), 7.46 ~ 7.48 (m, 2H), 7.80 ~ 7.83 (m, 4H), 8.12 ~ 8.14 (m, 2H);  $^{19}\text{F}$  NMR ( $\text{CDCl}_3$ )  $\delta$  = -51.43 (q,  $J$  = 16.2 Hz, 3F), -50.17 (q,  $J$  = 16.2 Hz, 3F), -48.29 (s, 3F); **3d** :  $^1\text{H}$  NMR ( $\text{CDCl}_3$ )  $\delta$  = 1.35 ~ 1.45 (m, 9H), 4.30 ~ 4.43 (m, 6H), 7.39 ~ 7.41 (m, 6H), 8.07 ~ 8.09 (m, 6H);  $^{19}\text{F}$  NMR ( $\text{CDCl}_3$ )  $\delta$  = -46.70 (s, 9F).

**3,5,6-Tris(2-chlorophenyl)-1,2,4-tris(trifluoromethyl)benzene (2e)** and  
**2,4,6-Tris(2-chlorophenyl)-1,3,5-tris(trifluoromethyl)benzene (3e)**

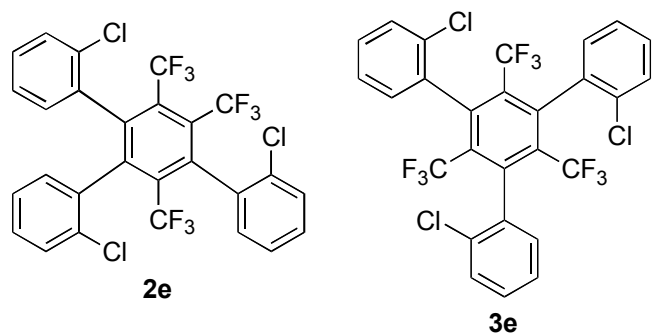

Combined yield : 49% ( $^{19}\text{F}$  NMR yield), 40% (isolated yield); Isomeric ratio (**2e** : **3e**) = 88:12 (inseparable); HRMS (FAB) calcd for ( $\text{M}^+$ )  $\text{C}_{27}\text{H}_{12}\text{ClF}_9$ : 611.9867, Found 611.9861; **2e** : (atropisomer 1) :  $^1\text{H}$  NMR ( $\text{CDCl}_3$ )  $\delta$  = 7.05 ~ 7.50 (m, 12H);  $^{19}\text{F}$  NMR ( $\text{CDCl}_3$ )  $\delta$  = -53.04 (q,  $J$  = 17.5 Hz, 3F), -52.67 (s, 3F), -52.28 (q,  $J$  = 17.5 Hz, 3F); IR (KBr) 2963, 1638, 1435, 1323, 1261, 1235, 1173, 1096, 1022, 802  $\text{cm}^{-1}$ ; (atropisomer 2) :  $^1\text{H}$  NMR ( $\text{CDCl}_3$ )  $\delta$  = 7.04 ~ 7.49 (m, 12H);  $^{19}\text{F}$  NMR ( $\text{CDCl}_3$ )  $\delta$  = -53.49 (q,  $J$  = 17.1 Hz, 3F), -52.77 (s, 3F), -52.35 (q,  $J$  = 17.1 Hz, 3F); (atropisomer 3) :  $^1\text{H}$  NMR ( $\text{CDCl}_3$ )  $\delta$  = 7.04 ~ 7.49 (m, 12H);  $^{19}\text{F}$  NMR ( $\text{CDCl}_3$ )  $\delta$  = -53.29 (q,  $J$  = 18.1 Hz, 3F), -52.80 (s, 3F), -52.24 (q,  $J$  = 18.1 Hz, 3F); **3e** :  $^1\text{H}$  NMR ( $\text{CDCl}_3$ )  $\delta$  = 7.04 ~ 7.49 (m, 12H); (atropisomer 1) :  $^{19}\text{F}$  NMR ( $\text{CDCl}_3$ )  $\delta$  = -51.29 (s, 9F); (atropisomer 2) :  $^{19}\text{F}$  NMR ( $\text{CDCl}_3$ )  $\delta$  = -51.21 (s, 9F).

**2,4,6-Tris(2-chlorophenyl)-1,3,5-tris(trifluoromethyl)benzene (2f)** and  
**2,4,6-Tris(2-chlorophenyl)-1,3,5-tris(trifluoromethyl)benzene (3f)**

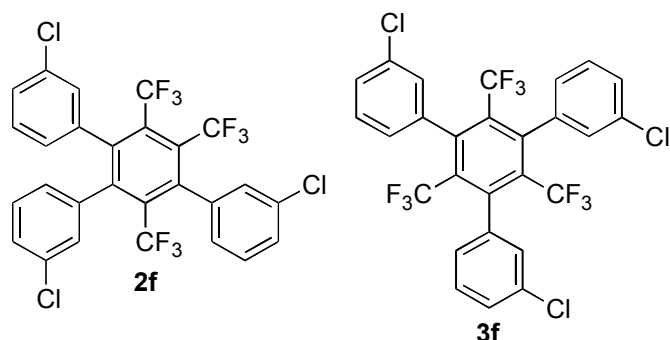

Combined yield : 93% ( $^{19}\text{F}$  NMR yield), 80% (isolated yield); Isomeric ratio (**2f** : **3f**) = 82:18 (inseparable); HRMS (FAB) calcd for ( $M^+$ )  $\text{C}_{27}\text{H}_{12}\text{ClF}_9$ : 611.9853, Found 611.9861;  $^1\text{H}$  NMR ( $\text{CDCl}_3$ )  $\delta = 6.80 \sim 7.47$  (m, 12H); **2f**:  $^{19}\text{F}$  NMR ( $\text{CDCl}_3$ )  $\delta = -51.48$  (q,  $J = 16.2$  Hz, 3F),  $-50.26$  (q,  $J = 16.2$  Hz, 3F),  $-48.41$  (s, 3F); **3f**:  $^{19}\text{F}$  NMR ( $\text{CDCl}_3$ )  $\delta = -46.80$  (s, 9F).

**General procedure for [2+2+2] cyclization of fluoroalkylated alkynes and non-fluorinated alkynes**

To a suspension of  $\text{RhCl}_3 \cdot 3\text{H}_2\text{O}$  (13 mg, 0.05 mmol) in toluene (0.5 mL) were added *i*- $\text{Pr}_2\text{NEt}$  (24 mg, 0.15 mmol) and fluoroalkylated alkynes (0.50 mmol), diphenylacetylene (1.0 mmol, 0.178 g), and then the mixture was stirred at the reflux temperature for 18 h. After being cooled to room temperature, the residue was purified by column chromatography on silica gel (EtOAc/Hexane) to afford the corresponding fluoroalkylated benzene derivatives.

**2-(4-Chlorophenyl)-1-trifluoromethyl-3,4,5,6-tetraphenylbenzene (5a)**

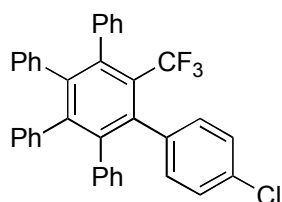

Yield : 51% ( $^{19}\text{F}$  NMR yield), 50% (isolated yield); m.p. 176~178 °C; HRMS (FAB) calcd for ( $M^+$ )  $\text{C}_{37}\text{H}_{24}\text{ClF}_3$ : 560.1514, Found 560.1519;  $^1\text{H}$  NMR ( $\text{CDCl}_3$ )  $\delta = 6.77 \sim 6.87$  (m, 15H), 7.08 ~ 7.15 (m, 9H);  $^{13}\text{C}$  NMR ( $\text{CDCl}_3$ )  $\delta = 125.66, 125.76, 125.87, 126.50, 126.56, 126.63, 126.78, 127.00$  (q,  $J = 25.6$

Hz), 127.06, 128.91 (q,  $J = 285.9$  Hz), 130.04 (q,  $J = 1.7$  Hz), 130.45, 130.79, 130.84, 131.42 (q,  $J = 1.6$  Hz), 137.79, 138.78, 138.84 (q,  $J = 1.6$  Hz), 138.93, 139.05, 139.25, 140.33 (q,  $J = 1.6$  Hz), 142.50, 142.90, 144.51;  $^{19}\text{F}$  NMR ( $\text{CDCl}_3$ )  $\delta = -47.96$  (s, 3F); IR (KBr) 1493, 1441, 1407, 1342, 1235, 1176, 1121, 806, 745, 697, 564  $\text{cm}^{-1}$ .

**2,4-Bis(4-chlorophenyl)-1,3-bis(trifluoromethyl)-5,6-diphenylbenzene,**  
**2,3-Bis(4-chlorophenyl)-1,4-bis(trifluoromethyl)-5,6-diphenylbenzene, and**  
**3,6-Bis(4-chlorophenyl)-1,2-bis(trifluoromethyl)-4,5-diphenylbenzene (6a)**

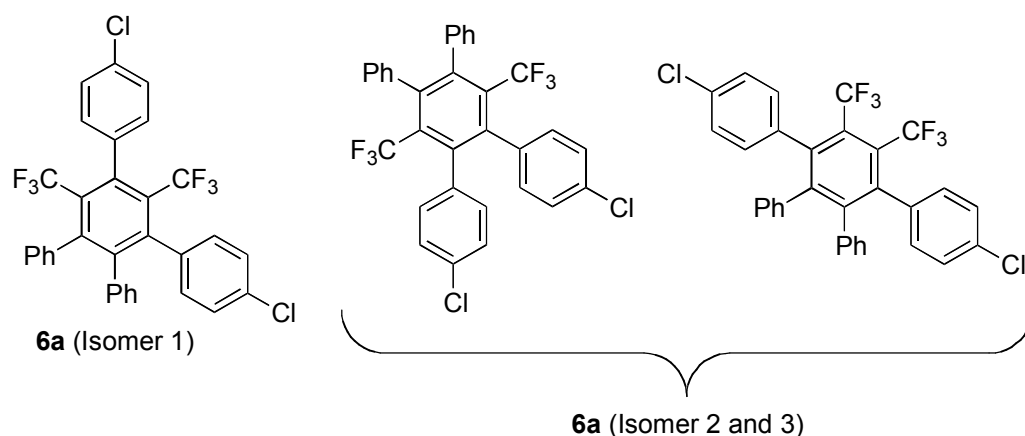

Combined yield : 41% ( $^{19}\text{F}$  NMR yield), Isomeric ratio = 38:15:47 (inseparable); HRMS (FAB) calcd for ( $\text{M}^+$ )  $\text{C}_{32}\text{H}_{18}\text{Cl}_2\text{F}_6$ : 586.0690, Found 586.0690;  $^1\text{H}$  NMR ( $\text{CDCl}_3$ )  $\delta = 6.87 \sim 7.43$  (m, 18H); (Isomer 1) :  $^{19}\text{F}$  NMR ( $\text{CDCl}_3$ )  $\delta = -47.61$  (s, 3F),  $-47.44$  (s, 3F); (Isomer 2) :  $^{19}\text{F}$  NMR ( $\text{CDCl}_3$ )  $\delta = -50.33$  (s, 6F); (Isomer 3) :  $^{19}\text{F}$  NMR ( $\text{CDCl}_3$ )  $\delta = -49.01$  (s, 6F).

**1-Trifluoromethyl-2,3,4,5,6-pentaphenylbenzene (5b)**

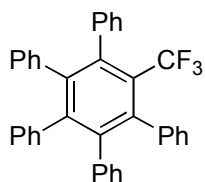

Yield : 47% ( $^{19}\text{F}$  NMR yield), 32% (isolated yield); m.p. 275-277  $^\circ\text{C}$ ; HRMS (FAB) calcd for ( $\text{M}^+$ )  $\text{C}_{37}\text{H}_{25}\text{F}_3$ : 526.1909, Found 526.1908;  $^1\text{H}$  NMR ( $\text{CDCl}_3$ )  $\delta = 6.78 \sim 6.85$  (m, 16H), 7.08  $\sim$  7.17 (m, 9H);  $^{13}\text{C}$  NMR ( $\text{CDCl}_3$ )  $\delta = 125.16, 125.58, 125.66, 126.42, 126.53, 126.55, 126.58, 126.74, 127.15$  (q,  $J = 281.1$  Hz), 130.13 (q,  $J = 1.7$  Hz), 130.54, 130.93, 131.39, 139.11, 140.15 (q,  $J = 1.6$  Hz), 140.59, 142.52;  $^{19}\text{F}$  NMR ( $\text{CDCl}_3$ )  $\delta = -48.05$  (s, 3F); IR (KBr) 2962, 2925, 2371, 1735, 1442, 1261, 1097, 1029, 802, 741, 697  $\text{cm}^{-1}$ .

**1,3-Bis(trifluoromethyl)-2,4,5,6-tetraphenylbenzene and  
1,4-bis(trifluoromethyl)-2,3,5,6-tetraphenylbenzene,  
1,2-bis(trifluoromethyl)-3,4,5,6-tetraphenylbenzene (6b)**

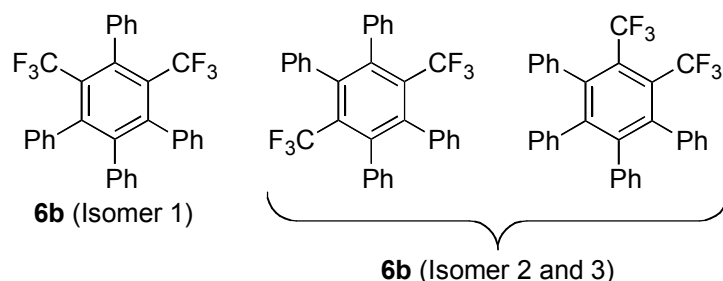

Combined yield : 36% ( $^{19}\text{F}$  NMR yield); Isomeric ratio = 33:15:52 (inseparable); HRMS (FAB) calcd for ( $\text{M}^+$ )  $\text{C}_{32}\text{H}_{20}\text{F}_6$ : 518.1475, Found 518.1469;  $^1\text{H}$  NMR ( $\text{CDCl}_3$ )  $\delta = 6.95 \sim 7.46$  (m, 20H); (Isomer 1) :  $^{19}\text{F}$  NMR ( $\text{CDCl}_3$ )  $\delta = -47.60$  (s, 6F); (Isomer 2) :  $^{19}\text{F}$  NMR ( $\text{CDCl}_3$ )  $\delta = -50.36$  (s, 6F); (Isomer 3) :  $^{19}\text{F}$  NMR ( $\text{CDCl}_3$ )  $\delta = -49.00$  (s, 6F).

**1-Trifluoromethyl-2-(4-methoxyphenyl)-3,4,5,6-tetraphenylbenzene (5c)**

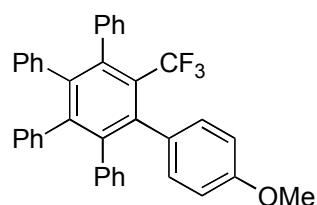

Yield : 45% ( $^{19}\text{F}$  NMR yield), 43% (isolated yield); m.p. 228~230 °C; HRMS (FAB) calcd for ( $\text{M}^+$ )  $\text{C}_{38}\text{H}_{27}\text{F}_3\text{O}$ : 556.2016, Found 556.2014;  $^1\text{H}$  NMR ( $\text{CDCl}_3$ )  $\delta = 6.65 \sim 6.67$  (m, 2H), 6.76 ~ 6.85 (m, 15H), 7.05 ~ 7.16 (m, 7H);  $^{13}\text{C}$  NMR ( $\text{CDCl}_3$ )  $\delta = 54.95, 124.4$  (q,  $J = 277.7$  Hz), 125.54, 125.62, 126.36, 126.50, 126.55, 126.59, 126.73, 127.01 (q,  $J = 26.4$  Hz), 130.08 (q,  $J = 1.6$  Hz), 130.52, 130.88, 130.93, 131.15, 131.16 (q,  $J = 1.7$  Hz), 131.54, 139.15, 139.25, 139.39, 139.54, 140.00 (q,  $J = 1.7$  Hz), 140.11 (q,  $J = 1.6$  Hz), 142.36, 142.93, 144.27;  $^{19}\text{F}$  NMR ( $\text{CDCl}_3$ )  $\delta = -48.04$  (s, 3F); IR (KBr) 1493, 1441, 1407, 1342, 1235, 1176, 1121, 806, 745, 697, 564  $\text{cm}^{-1}$ .

**1,3-Bis(trifluoromethyl)-2,4-bis(4-methoxyphenyl)-5,6-diphenylbenzene and  
1,4-Bis(trifluoromethyl)-2,3-bis(4-methoxyphenyl)-5,6-diphenylbenzene,  
1,2-Bis(trifluoromethyl)-3,6-bis(4-methoxyphenyl)-4,5-diphenylbenzene (6c)**

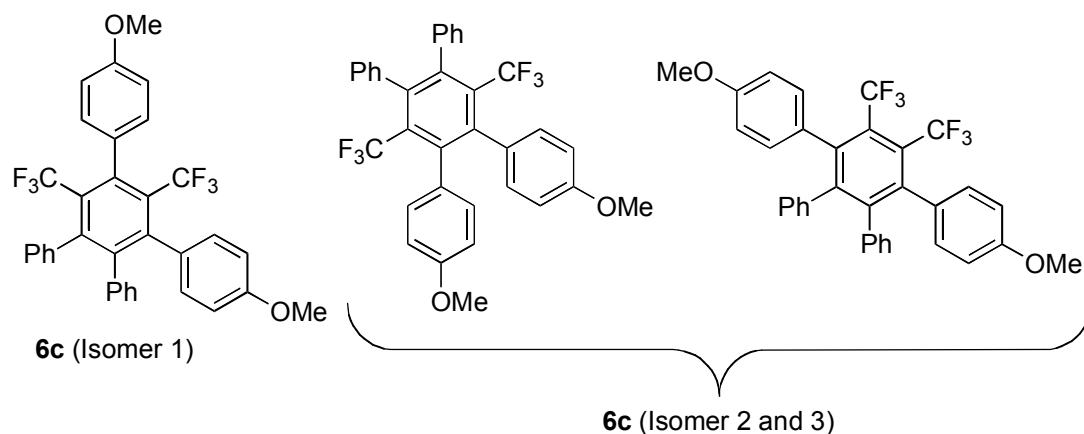

Combined yield : 37% ( $^{19}\text{F}$  NMR yield); Isomeric ratio = 49:13:38 (inseparable); HRMS (FAB) calcd for ( $\text{M}^+$ )  $\text{C}_{34}\text{H}_{24}\text{F}_6\text{O}_2$ : 578.1678, Found 578.1680; (Isomer 1) :  $^{19}\text{F}$  NMR ( $\text{CDCl}_3$ )  $\delta = -47.79$  (s, 3F),  $-47.64$  (s, 3F); (Isomer 2) :  $^{19}\text{F}$  NMR ( $\text{CDCl}_3$ )  $\delta = -50.50$  (s, 6F); (Isomer 3) :  $^{19}\text{F}$  NMR ( $\text{CDCl}_3$ )  $\delta = -49.05$  (s, 6F).

**2-(4-ethoxycarbonylphenyl)-1-trifluoromethyl-3,4,5,6-tetraphenylbenzene (5d)**

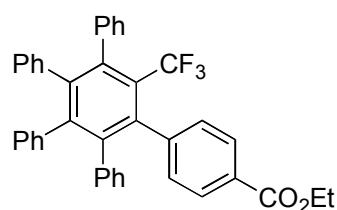

Combined yield : m.p. 228~230 °C; 45%; HRMS (FAB) calcd for ( $\text{M}^+$ )  $\text{C}_{40}\text{H}_{29}\text{F}_3\text{O}_2$ : 598.2116, Found 598.2120;  $^1\text{H}$  NMR ( $\text{CDCl}_3$ )  $\delta = 1.36$  (t,  $J = 7.6$  Hz, 3H), 4.31 (q,  $J = 7.2$  Hz, 2H), 6.77 ~ 6.84 (m, 16H), 7.10 ~ 7.14 (m, 4H), 7.25 ~ 7.26 (m, 2H), 7.81 ~ 7.83 (m, 2H);  $^{13}\text{C}$  NMR ( $\text{CDCl}_3$ )  $\delta = 14.23$ , 60.80, 124.22 (q,  $J = 276.9$  Hz), 125.66, 125.76, 125.90, 126.39, 126.51, 126.61, 126.73, 126.77, 128.08, 128.46, 130.05 (q,  $J = 1.7$  Hz), 130.17 (q,  $J = 1.6$  Hz), 130.44, 130.77, 130.82, 131.36, 138.59, 138.94, 139.04 (q,  $J = 1.7$  Hz), 139.17, 140.34 (q,  $J = 1.7$  Hz), 142.12, 142.99, 144.27, 144.53, 166.44;  $^{19}\text{F}$  NMR ( $\text{CDCl}_3$ )  $\delta = -48.00$  (s, 3F); IR (KBr) 3057, 2962, 2371, 1719, 1610, 1497, 1442, 1343, 1273, 1175, 1123, 1023



cm<sup>-1</sup>.

**2,4-Bis(4-ethoxycarbonylphenyl)-1,3-bis(trifluoromethyl)-5,6-diphenylbenzene,**  
**2,4-Bis(4-ethoxycarbonylphenyl)-1,3-bis(trifluoromethyl)-5,6-diphenylbenzene, and**  
**2,4-Bis(4-ethoxycarbonylphenyl)-1,3-bis(trifluoromethyl)-5,6-diphenylbenzene (6d)**

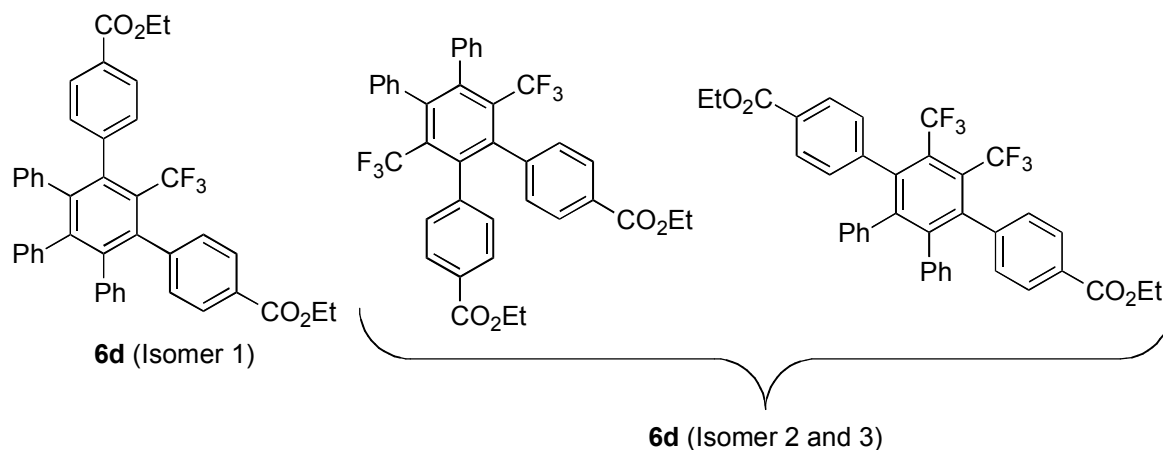

Combined yield : 32%; Isomeric ratio = 37:16:47; HRMS (FAB) calcd for (M+H) C<sub>38</sub>H<sub>29</sub>F<sub>6</sub>O<sub>4</sub>: 663.1967, Found 663.1970; (Isomer 1) : <sup>19</sup>F NMR (CDCl<sub>3</sub>) δ = -47.57 (s, 3F), -47.37 (s, 3F); (Isomer 2) : <sup>19</sup>F NMR (CDCl<sub>3</sub>) δ = -50.24 (s, 6F); (Isomer 3) : <sup>19</sup>F NMR (CDCl<sub>3</sub>) δ = -48.97 (s, 6F).

### **2-(Decyl)-1-trifluoromethyl-3,4,5,6-tetraphenylbenzene (5g)**

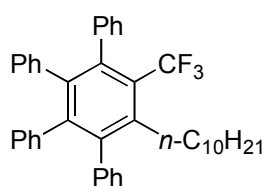

Yield : 41% (<sup>19</sup>F NMR yield), 33% (isolated yield); m.p. 106~108 °C; HRMS (FAB) calcd for (M<sup>+</sup>) C<sub>41</sub>H<sub>41</sub>F<sub>3</sub>: 590.3157, Found 590.3160; <sup>1</sup>H NMR (CDCl<sub>3</sub>) δ = 0.88 (t, *J* = 7.0 Hz, 3H), 1.03 ~ 1.47 (m, 16H), 2.68 ~ 2.75 (m, 2H), 6.66 ~ 6.81 (m, 9H), 7.04 ~ 7.17 (m, 11H); <sup>13</sup>C NMR (CDCl<sub>3</sub>) δ = 14.10, 22.67, 28.77, 29.28, 29.31, 29.49, 29.92, 31.29 (q, *J* = 1.5 Hz), 31.79 (q, *J* = 2.8 Hz), 31.89, 125.45, 126.25 (q, *J* = 23.5 Hz), 126.41, 126.41 (q, *J* = 275.9 Hz), 126.47, 126.69, 127.28, 129.87 (q, *J* = 1.8 Hz), 130.02, 130.38, 130.42, 130.56, 131.01, 131.23, 131.50, 139.31, 139.55, 140.24 (q, *J* = 1.4 Hz), 140.33 (q, *J* = 1.5 Hz), 140.68, 143.06, 144.61; <sup>19</sup>F NMR (CDCl<sub>3</sub>) δ = -49.77 (s, 3F); IR (KBr) 2371, 1654, 1542,

1509, 1117  $\text{cm}^{-1}$ .

**2,6-Didodecyl-1,3-bis(trifluoromethyl)-4,5-diphenylbenzene,  
5,6-didodecyl-1,4-bis(trifluoromethyl)-2,3-diphenylbenzene, and  
3,6-didodecyl-1,2-bis(trifluoromethyl)-3,4-diphenylbenzene (6g)**

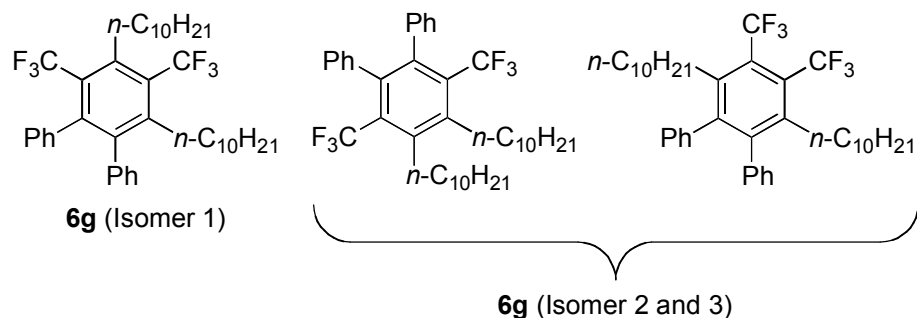

Combined yield : 32% ( $^{19}\text{F}$  NMR yield); Isomeric ratio = 31:13:56 (inseparable);  $^{19}\text{F}$  NMR ( $\text{CDCl}_3$ )  $\delta$  = -51.11 (s, 3F), -49.05 (s, 3F); (Isomer 2) :  $^{19}\text{F}$  NMR ( $\text{CDCl}_3$ )  $\delta$  = -52.49 (s, 3F); (Isomer 3) :  $^{19}\text{F}$  NMR ( $\text{CDCl}_3$ )  $\delta$  = -50.44 (s, 3F).

**Diethyl (1-trifluoromethyl-2,3,4,5-tetraphenyl)phenylphosphonate (5i)**

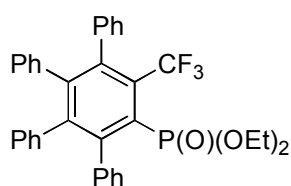

Yield : 16% ( $^{19}\text{F}$  NMR yield); HRMS (FAB) calcd for (M+H)  $\text{C}_{35}\text{H}_{31}\text{F}_3\text{O}_3\text{P}$ : 587.1965, Found 587.1963;  $^1\text{H}$  NMR ( $\text{CDCl}_3$ )  $\delta$  = 1.17 (t,  $J$  = 6.8 Hz, 6H), 3.54 ~ 3.61 (m, 2H), 3.88 ~ 3.96 (m, 2H), 6.54 ~ 6.85 (m, 4H), 6.79 ~ 6.85 (m, 6H), 7.02 ~ 7.14 (m, 10H);  $^{13}\text{C}$  NMR ( $\text{CDCl}_3$ )  $\delta$  = 16.02, 16.09, 61.90, 61.97, 125.75, 125.80, 126.49 (q,  $J$  = 271.9 Hz), 126.71, 126.74, 126.82, 126.87, 126.93, 130.52, 130.75, 131.34, 138.41, 138.52, 140.06, 140.11, 141.61, 141.72, 144.54, 144.68, 145.83, 145.87, 146.34, 146.42;  $^{19}\text{F}$  NMR ( $\text{CDCl}_3$ )  $\delta$  = -49.09 (s, 3F);  $^{31}\text{P}$  NMR ( $\text{CDCl}_3$ )  $\delta$  = -109.30; IR (KBr) 2985, 2371, 1637, 1492, 1443, 1393, 1334, 1254, 1227, 1161, 1130, 1058, 1021, 966, 872  $\text{cm}^{-1}$ .

### 6-(4-Chlorophenyl)-1-trifluoromethyl-2,3,4,5-tetramethoxycarbonylbenzene (5j)

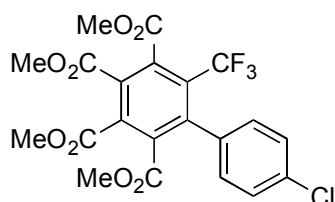

Yield : 17% ( $^{19}\text{F}$  NMR yield), 11% (isolated yield); HRMS (FAB) calcd for ( $\text{M}^+$ )  $\text{C}_{21}\text{H}_{16}\text{F}_3\text{ClO}_8$ : 488.0482, Found 488.0486;  $^1\text{H}$  NMR ( $\text{CDCl}_3$ )  $\delta$  = 3.50 (s, 3H), 3.87 (s, 3H), 3.90 (s, 3H), 3.94 (s, 3H), 7.17 (d,  $J$  = 8.4 Hz, 2H), 7.37 (d,  $J$  = 8.8 Hz, 2H);  $^{13}\text{C}$  NMR ( $\text{CDCl}_3$ )  $\delta$  = 52.74, 53.52, 122.09 (q,  $J$  = 276.0 Hz), 127.76, 129.14 (q,  $J$  = 30.6 Hz), 130.81, 131.62, 132.41, 133.05, 133.86, 133.88, 135.19, 137.62, 141.30, 141.31, 164.93, 165.19, 165.52, 165.81;  $^{19}\text{F}$  NMR ( $\text{CDCl}_3$ )  $\delta$  = -53.88 (s, 3F); IR (KBr) 2345, 1736, 1638, 1442, 1257, 1227  $\text{cm}^{-1}$ .

### 2,6-Bis(4-chlorophenyl)-1,3-bis(trifluoromethyl)-4,5-dimethoxycarbonylbenzene, 5,6-Bis(4-chlorophenyl)-1,4-bis(trifluoromethyl)-2,3-dimethoxycarbonylbenzene, and 3,6-Bis(4-chlorophenyl)-1,2-bis(trifluoromethyl)-4,5-dimethoxycarbonylbenzene (6j)

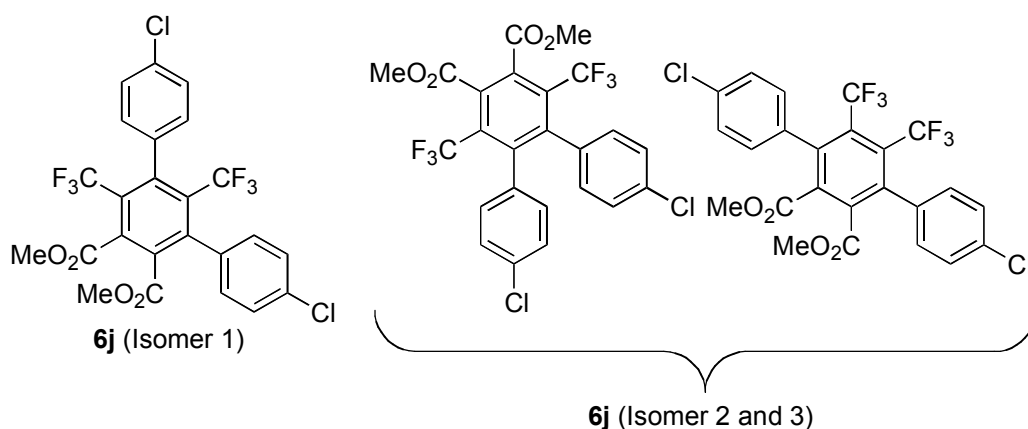

Combined yield : 17% ( $^{19}\text{F}$  NMR yield); Isomeric ratio = 35:24:41 (inseparable); HRMS (FAB) calcd for ( $\text{M}^+$ )  $\text{C}_{24}\text{H}_{14}\text{F}_6\text{Cl}_2\text{O}_4$ : 550.0176, Found 550.0173;  $^1\text{H}$  NMR ( $\text{CDCl}_3$ )  $\delta$  = 1.25 ~ 1.39 (m, 4H), 3.49 ~ 3.96 (m, 6H), 5.72 ~ 7.43 (m, 18H); (Isomer 1) :  $^{19}\text{F}$  NMR ( $\text{CDCl}_3$ )  $\delta$  = -52.67 (s, 3F), -48.46 (s, 3F); (Isomer

2) :  $^{19}\text{F}$  NMR ( $\text{CDCl}_3$ )  $\delta = -53.88$  (s, 3F); (Isomer 3) :  $^{19}\text{F}$  NMR ( $\text{CDCl}_3$ )  $\delta = -50.84$  (s, 3F).

**2-(4-Chlorophenyl)-1-trifluoromethyl-3,4,5,6-tetrapropylbenzene (5I)**

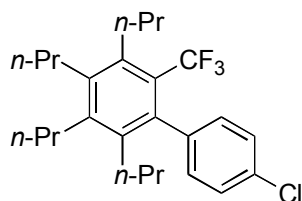

Yield : 21% ( $^{19}\text{F}$  NMR yield), 11% (isolated yield); HRMS (FAB) calcd for ( $\text{M}^+$ )  $\text{C}_{25}\text{H}_{32}\text{ClF}_3$ : 424.2149, Found 424.2145;  $^1\text{H}$  NMR ( $\text{CDCl}_3$ )  $\delta = 1.06$  (t,  $J = 7.6$  Hz, 12H), 1.50 ~ 1.60 (m, 10H), 2.46 ~ 2.50 (m, 6H), 7.09 (d,  $J = 8.8$  Hz, 2H), 7.33 (d,  $J = 8.4$  Hz, 2H);  $^{19}\text{F}$  NMR ( $\text{CDCl}_3$ )  $\delta = -49.41$  (s, 3F).

**2,6-Bis(4-chlorophenyl)-1,3-trifluoromethyl-4,5-dipropylbenzene,  
2,3-Bis(4-chlorophenyl)-1,4-trifluoromethyl-5,6-dipropylbenzene, and  
3,6-Bis(4-chlorophenyl)-1,2-trifluoromethyl-4,5-dipropylbenzene (6I)**

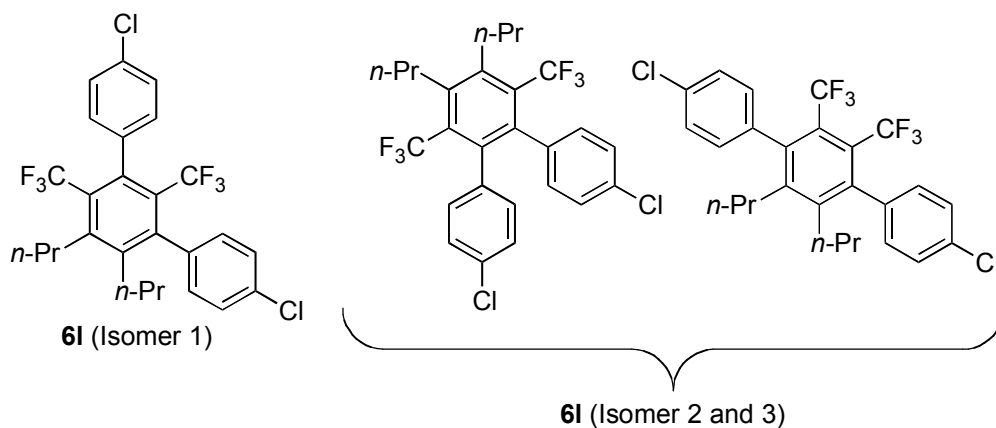

Combined yield : 69% ( $^{19}\text{F}$  NMR yield);  $^{19}\text{F}$  NMR ( $\text{CDCl}_3$ )  $\delta = -49.18$  (s, 3F),  $-47.25$  (s, 3F); (Isomer 2) :  $^{19}\text{F}$  NMR ( $\text{CDCl}_3$ )  $\delta = -50.56$  (s, 3F); (Isomer 3) :  $^{19}\text{F}$  NMR ( $\text{CDCl}_3$ )  $\delta = -50.44$  (s, 3F).

**General procedure for [2+2+2] cycloaddition of fluoroalkylated alkynes and non-fluorinated diynes**

To a suspension of  $\text{RhCl}_3 \cdot 3\text{H}_2\text{O}$  (13 mg, 0.05 mmol) in toluene (0.5 mL) were added *i*- $\text{Pr}_2\text{NEt}$  (24 mg, 0.15 mmol) and fluoroalkylated alkynes (0.50 mmol), non-fluorinated diynes (0.5 mmol). The

mixture was stirred at the reflux temperature for 18 h. After being cooled to room temperature, the residue was purified by column chromatography on silica gel (EtOAc/Hexane) to afford the corresponding fluoroalkylated benzene derivatives.

### 7-Trifluoromethyl-8-(4-chlorophenyl)-1,2,3,4-tetrahydronaphthalene (7a)

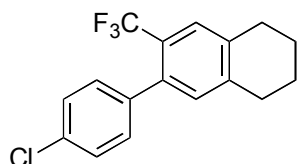

Yield : 15% ( $^{19}\text{F}$  NMR yield);  $^1\text{H}$  NMR ( $\text{CDCl}_3$ )  $\delta$  = 1.78 ~ 1.86 (m, 4H), 2.80 ~ 2.84 (m, 4H), 6.98 (s, 1H), 7.22 ~ 7.25 (m, 2H), 7.33 ~ 7.37 (m, 2H), 7.43 (s, 1H);  $^{19}\text{F}$  NMR ( $\text{CDCl}_3$ )  $\delta$  = -57.03 (s, 3F).

### Diethyl 6-(4-chlorophenyl)-5-trifluoromethyl-1H-indene-2,2(3H)-dicarboxylate (8a)

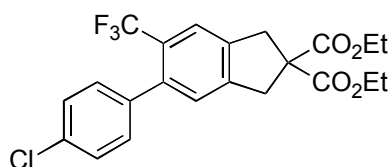

Yield : 20% ( $^{19}\text{F}$  NMR yield); HRMS (FAB) calcd for (M+H)  $\text{C}_{22}\text{H}_{21}\text{F}_3\text{ClO}_4$ : 441.1080, Found 440.1071;  $^1\text{H}$  NMR ( $\text{CDCl}_3$ )  $\delta$  = 1.30 (t,  $J$  = 7.2 Hz, 6H), 3.65 (s, 2H), 3.69 (s, 2H), 4.25 (q,  $J$  = 6.8 Hz, 4H), 7.13 (s, 1H), 7.24 (d,  $J$  = 8.4 Hz, 2H), 7.37 (d,  $J$  = 8.4 Hz, 2H), 7.58 (s, 1H);  $^{13}\text{C}$  NMR ( $\text{CDCl}_3$ )  $\delta$  = 13.97, 40.08, 40.26, 60.30, 61.98, 121.96 (q,  $J$  = 5.8 Hz), 124.10 (q,  $J$  = 273.6 Hz), 127.37 (q,  $J$  = 30.6 Hz), 127.67, 127.87;  $^{19}\text{F}$  NMR ( $\text{CDCl}_3$ )  $\delta$  = -57.02 (s, 3F); IR (KBr) 3467, 2982, 2318, 1906, 1732, 1597, 1485, 1297, 1135, 911  $\text{cm}^{-1}$ .

### 7-(4-Chlorophenyl)-6-trifluoromethyl-2-p-toluenesulfonylisindoline (9a)

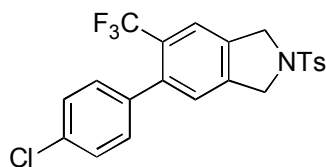

Yield : 21% ( $^{19}\text{F}$  NMR yield); m.p. 192~193 °C; HRMS (FAB) calcd for (M+H)  $\text{C}_{22}\text{H}_{18}\text{ClF}_3\text{NO}_2\text{S}$ : 452.0696, Found 452.0699;  $^1\text{H}$  NMR ( $\text{CDCl}_3$ )  $\delta$  = 2.42 (s, 3H), 4.67 (s, 2H), 4.69 (s, 2H), 7.10 (s, 1H),

7.17 (d,  $J = 8.4$  Hz, 2H), 7.33 ~ 7.36 (m, 4H), 7.55 (s, 1H), 7.79 (d,  $J = 8.4$  Hz, 2H);  $^{13}\text{C}$  NMR ( $\text{CDCl}_3$ )  $\delta = 21.78, 53.64, 53.73, 120.94$  (q,  $J = 5.7$  Hz),  $124.19$  (q,  $J = 273.6$  Hz),  $126.50, 127.87, 128.34, 130.24, 130.49, 130.50, 133.65, 133.34, 136.32, 137.78, 140.21, 140.43, 144.32$ ;  $^{19}\text{F}$  NMR ( $\text{CDCl}_3$ )  $\delta = -57.26$  (s, 3F); IR (KBr)  $3449, 2370, 1638, 1342, 1158, 1102$   $\text{cm}^{-1}$ .

### General procedure for the synthesis of fluoroalkylated diynes

To stirred and cooled ( $0$  °C) solution of  $\gamma$ -fluoroalkylated propargyl alcohol (1.0 mmol), propargyl bromide (0.179 g, 1.5 mmol), and tetrabutylammonium iodide (0.018 g, 0.05 mmol) in  $\text{CH}_2\text{Cl}_2$  (2 mL) was added slowly a solution of NaOH (0.006 g, 1.5 mmol) in water (1 mL). The cooling bath was removed and the mixture was vigorously stirred at room temperature until completion of the reaction (5 d). The organic layer was extracted with  $\text{CH}_2\text{Cl}_2$ , and the combined  $\text{CH}_2\text{Cl}_2$  extracts were washed with brine, dried ( $\text{Na}_2\text{SO}_4$ ) and filtered. The filtrate was concentrated under reduced pressure and the residue was purified by column chromatography on silica gel (EtOAc/Hexane) to afford the corresponding fluoroalkylated diynes.

### 4,4,4-Trifluoro-1-methyl-1-phenyl-2-butyn-1-yl 2-propyn-1-yl ether (10A)

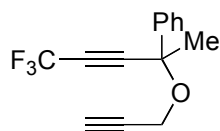

Yield : 80% ( $^{19}\text{F}$  NMR yield), 64% (isolated yield); HRMS (EI) calcd for (M-CH<sub>3</sub>)  $\text{C}_{13}\text{H}_8\text{F}_3\text{O}$ : 237.0521, Found 237.0527;  $^1\text{H}$  NMR ( $\text{CDCl}_3$ )  $\delta = 1.83$  (s, 3H), 2.45 (t,  $J = 2.4$  Hz, 1H), 3.86 (dd,  $J = 2.4, 15.2$  Hz, 1H), 4.16 (dd,  $J = 2.4, 14.4$  Hz, 1H), 7.37 ~ 7.44 (m, 3H), 7.53 ~ 7.55 (m, 2H);  $^{13}\text{C}$  NMR ( $\text{CDCl}_3$ )  $\delta = 31.98, 31.99, 53.84, 74.46, 76.30, 79.26, 86.58$  (q,  $J = 5.8$  Hz),  $114.03$  (q,  $J = 257.9$  Hz),  $125.55, 128.84, 128.87, 139.54$ ;  $^{19}\text{F}$  NMR ( $\text{CDCl}_3$ )  $\delta = -50.82$  (s, 3F); IR (neat)  $3312, 2963, 2271, 1703, 1492, 1448, 1375, 1279, 1149, 1096, 1046, 804, 765, 700, 501$   $\text{cm}^{-1}$ .

### 4,4,4-Trifluoro-1,1-diphenyl-2-butyn-1-yl 2-propyn-1-yl ether (10B)

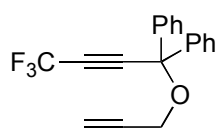

Yield : 40% ( $^{19}\text{F}$  NMR yield), 21% (isolated yield); m.p.  $31\sim 32$  °C; HRMS (FAB) calcd for (M<sup>+</sup>)

C<sub>19</sub>H<sub>13</sub>F<sub>3</sub>O: 314.0912, Found 314.0918; <sup>1</sup>H NMR (CDCl<sub>3</sub>) δ = 2.46 (t, *J* = 2.4 Hz, 1H), 4.16 (d, *J* = 2.4 Hz, 2H), 7.31 ~ 7.39 (m, 6H), 7.47 ~ 7.50 (m, 4H); <sup>13</sup>C NMR (CDCl<sub>3</sub>) δ = 53.91, 74.59, 76.45, 79.15, 80.27 (q, *J* = 1.7 Hz), 85.96 (q, *J* = 5.8 Hz), 114.08 (q, *J* = 257.8 Hz), 126.59, 128.60, 128.66, 140.40; <sup>19</sup>F NMR (CDCl<sub>3</sub>) δ = -50.83 (s, 3F); IR (neat) 3300, 3063, 3031, 2925, 2867, 2258, 1957, 1726, 159, 1492, 1450, 1375, 1270, 1216, 1146, 1063, 826 cm<sup>-1</sup>.

#### 4,4-Difluoro-1-methyl-1-phenyl-2-butyn-1-yl 2-propyn-1-yl ether (10C)

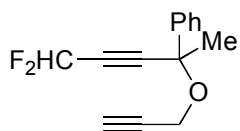

Yield : 68% (<sup>19</sup>F NMR yield), 50% (isolated yield); HRMS (EI) calcd for (M<sup>+</sup>) C<sub>14</sub>H<sub>12</sub>F<sub>2</sub>O: 234.0863, Found 234.0856; <sup>1</sup>H NMR (CDCl<sub>3</sub>) δ = 1.70 (s, 3H), 2.32 (t, *J* = 2.4 Hz, 1H), 3.73 (dd, *J* = 2.4, 14.4 Hz, 1H), 4.08 (dd, *J* = 2.4, 14.8 Hz, 1H), 6.24 (t, *J* = 54.4 Hz, 1H), 7.23 ~ 7.31 (m, 3H), 7.45 ~ 7.47 (m, 2H); <sup>13</sup>C NMR (CDCl<sub>3</sub>) δ = 32.06 (t, *J* = 1.6 Hz), 53.51, 74.18, 76.31 (t, *J* = 1.6 Hz), 79.15 (t, *J* = 33.9 Hz), 79.52, 88.09 (t, *J* = 7.4 Hz), 103.50 (t, *J* = 232.2 Hz), 125.58, 128.52, 128.64, 140.13 (t, *J* = 1.6 Hz); <sup>19</sup>F NMR (CDCl<sub>3</sub>) δ = -106.68 (d, *J* = 53.8 Hz, 2F); IR (neat) 3306, 3064, 3030, 2993, 2934, 2866, 2260, 2131, 1602, 1494, 1447, 1191, 1117, 1013 cm<sup>-1</sup>.

#### 1-(3,3-Trifluoropropynyl)-1-prop-2-ynyloxy-cyclohexane (10D)

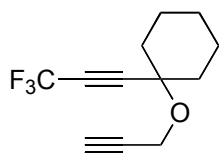

Yield : 70% (<sup>19</sup>F NMR yield), 15% (isolated yield); <sup>1</sup>H NMR (CDCl<sub>3</sub>) δ 1.25 ~ 1.34 (m, 1H), 1.44 ~ 1.55 (m, 3H), 1.68 ~ 1.74 (m, 4H), 1.95 ~ 1.98 (m, 2H), 2.45 (t, *J* = 2.4 Hz, 2H), 4.26 (d, *J* = 2.4 Hz, 2H); <sup>13</sup>C NMR (CDCl<sub>3</sub>) δ 22.30, 24.84, 24.85, 36.19, 52.20, 52.22, 73.55 (q, *J* = 2.5 Hz), 74.07 (q, *J* = 2.5 Hz), 74.24, 79.93, 87.91 (q, *J* = 6.6 Hz), 114.02 (q, *J* = 257.1 Hz); <sup>19</sup>F NMR (CDCl<sub>3</sub>) δ -50.55 (s, 3F); IR (neat) 3314, 2942, 2864, 2267, 1451, 1362, 1298, 1266, 1217, 1145, 1081, 1027, 938, 906, 861, 813 cm<sup>-1</sup>.

#### 4,4,4-Trifluoro-1-methyl-1-phenyl-2-butyn-1-yl 2-butyn-1-yl ether (10E)

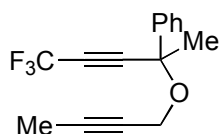

Yield : 48% ( $^{19}\text{F}$  NMR yield) (This compound could not be given in a pure form. A small amount of unidentified materials was contaminated.); HRMS (CI) calcd for (M+H)  $\text{C}_{15}\text{H}_{14}\text{F}_3\text{O}$ : 267.0993, Found 267.0997;  $^1\text{H}$  NMR ( $\text{CDCl}_3$ )  $\delta$  = 1.82 (s, 3H), 1.85 (t,  $J$  = 2.4 Hz, 3H), 3.81 (dd,  $J$  = 2.4, 14.4 Hz, 1H), 4.12 (dd,  $J$  = 2.0, 14.2 Hz, 1H), 7.33 ~ 7.43 (m, 3H), 7.52 ~ 7.54 (m, 2H);  $^{19}\text{F}$  NMR ( $\text{CDCl}_3$ )  $\delta$  = -50.71 (s, 3F).

#### 4,4,4-Trifluoro-1-hexyl-2-butyn-1-yl 2-propyn-1-yl ether (10F)

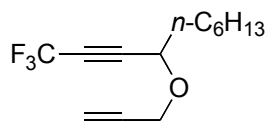

Yield : 57% ( $^{19}\text{F}$  NMR yield) (This compound could not be given in a pure form. A small amount of unidentified materials was contaminated.); HRMS (EI) calcd for (M+)  $\text{C}_{13}\text{H}_{17}\text{F}_3\text{O}$ : 246.1228, Found 246.1231;  $^1\text{H}$  NMR ( $\text{CDCl}_3$ )  $\delta$  = 1.27 ~ 1.36 (m, 7H), 1.43 ~ 1.50 (m, 3H), 1.73 ~ 1.85 (m, 3H), 2.46 (t,  $J$  = 2.5 Hz, 1H), 4.22 (dd,  $J$  = 2.5, 15.8 Hz, 1H), 4.33 (dd,  $J$  = 2.5, 15.8 Hz, 1H), 4.38 ~ 4.42 (m, 1H);  $^{19}\text{F}$  NMR ( $\text{CDCl}_3$ )  $\delta$  = -50.80 (s, 3F).

#### General procedure for fluoroalkylated 1,3-dihydroisobenzofuran derivatives

To a suspension of  $\text{RhCl}_3 \cdot 3\text{H}_2\text{O}$  (8 mg, 0.03 mmol) were added *i*- $\text{Pr}_2\text{NEt}$  (14 mg, 0.09 mmol) and fluoroalkylated diynes (0.30 mmol), diphenylacetylene (0.530 g, 3.0 mmol). The mixture was stirred at 130 °C (bath temp.) for 2 h. After being cooled to room temperature, the residue was purified by column chromatography on silica gel to afford corresponding fluoroalkylated 1,3-dihydroisobenzofuran derivatives.

#### 5-Trifluoromethyl-3-methyl-3,6,7-triphenyl-1,3-dihydroisobenzofuran (13a)

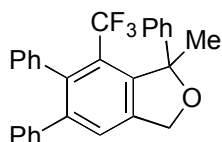

Yield : 73% ( $^{19}\text{F}$  NMR yield), 68% (isolated yield); m.p. 165-166 °C; HRMS (FAB) calcd for (M+Na)  $\text{C}_{28}\text{H}_{21}\text{F}_3\text{NaO}$ : 453.1449, Found 453.1442;  $^1\text{H}$  NMR ( $\text{CDCl}_3$ )  $\delta$  = 2.13 (s, 3H), 5.11 (d,  $J$  = 12.8 Hz, 1H), 5.16 (d,  $J$  = 12.4 Hz, 1H), 6.99 ~ 7.01 (m, 3H), 7.03 ~ 7.17 (m, 7H), 7.33 ~ 7.35 (m, 5H), 7.46 (s, 1H);



$^{13}\text{C}$  NMR ( $\text{CDCl}_3$ )  $\delta = 24.62$  (q,  $J = 4.1$  Hz), 69.91, 91.27, 123.78 (q,  $J = 276.9$  Hz), 124.73 (q,  $J = 29.7$  Hz), 125.72, 126.07, 126.67, 126.94, 127.50, 127.52, 128.04, 129.56, 130.51 (q,  $J = 1.7$  Hz), 130.63 (q,  $J = 1.6$  Hz), 137.91, 140.15 (q,  $J = 2.4$  Hz), 140.41, 141.61, 142.89 (q,  $J = 2.2$  Hz), 143.87 (q,  $J = 1.6$  Hz), 144.06;  $^{19}\text{F}$  NMR ( $\text{CDCl}_3$ )  $\delta = -49.94$  (s, 3F); IR (KBr) 2963, 2345, 1654, 1261, 1095  $\text{cm}^{-1}$ .

### 5-Trifluoromethyl-3-methyl-3-phenyl-6,7-propyl-1,3-dihydroisobenzofuran (13b)

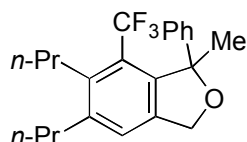

Yield : 49% ( $^{19}\text{F}$  NMR yield), 31% (isolated yield); HRMS (FAB) calcd for (M-H)  $\text{C}_{26}\text{H}_{24}\text{F}_3\text{O}_9$ : 361.1773, Found 361.1777;  $^1\text{H}$  NMR ( $\text{CDCl}_3$ )  $\delta = 0.97$  (q,  $J = 8.8$  Hz, 6H), 1.43 ~ 1.48 (m, 2H), 1.56 ~ 1.66 (m, 2H), 1.93 (s, 3H), 2.61 (q,  $J = 7.6$  Hz, 4H), 4.92 (d,  $J = 12.0$  Hz, 1H), 4.96 (d,  $J = 12.0$  Hz, 1H), 7.12 ~ 7.23 (m, 6H);  $^{13}\text{C}$  NMR ( $\text{CDCl}_3$ )  $\delta = 14.37$ , 14.73, 24.49, 24.65 (q,  $J = 7.4$  Hz), 24.94 (q,  $J = 1.7$  Hz), 32.07 (q,  $J = 2.4$  Hz), 34.56, 70.06, 91.42, 125.10, 125.80, 127.25, 127.43 (q,  $J = 276.1$  Hz), 127.98, 139.64, 140.02 (q,  $J = 2.5$  Hz), 141.41 (q,  $J = 1.7$  Hz), 143.14, 144.54 (q,  $J = 1.6$  Hz);  $^{19}\text{F}$  NMR ( $\text{CDCl}_3$ )  $\delta = -52.35$  (s, 3F); IR (neat) 2962, 2873, 1730, 1447, 1358, 1311, 1179, 1151, 1114  $\text{cm}^{-1}$ .

### 7-(4,4,4-Trifluoro-1-methyl-1-phenyl)but-2-ynyl-5-Trifluoromethyl-3-methyl-3-phenyl-1,3-dihydroisobenzofuran (15a)

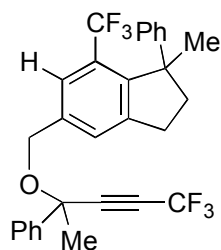

Yields are shown in Table 5. HRMS (FAB) calcd for ( $\text{M}^+$ )  $\text{C}_{28}\text{H}_{22}\text{F}_6\text{O}_2$ : 504.1528, Found 504.1524;  $^1\text{H}$  NMR ( $\text{CDCl}_3$ )  $\delta = 1.91$  (s, 3H), 2.01 (s, 3H), 4.32 (d,  $J = 11.2$  Hz, 1H), 4.63 (d,  $J = 11.6$  Hz, 1H), 5.07 (d,  $J = 12.8$  Hz, 1H), 5.12 (d,  $J = 12.8$  Hz, 1H), 7.21 ~ 7.31 (m, 5H), 7.38 ~ 7.49 (m, 5H), 7.59 ~ 7.61 (m, 2H);  $^{19}\text{F}$  NMR ( $\text{CDCl}_3$ )  $\delta = -58.18$  (s, 3F), -50.63 (s, 3F); IR (neat) 3062, 3032, 2989, 2961, 2936, 2855, 2270, 1729, 1602, 1495, 1349, 1323, 1278, 1194, 1144, 1076  $\text{cm}^{-1}$ .

**6-(4,4,4-Trifluoro-1-methyl-1-phenyl)but-2-ynyl-5-Trifluoromethyl-3-methyl-3-phenyl-1,3-dihydroisobenzofuran (15b)**

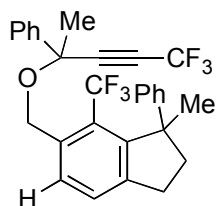

Yields are shown in Table 5. HRMS (FAB) calcd for ( $M^+$ )  $C_{28}H_{22}F_6O_2$ : 504.1522, Found 504.1524;  $^1H$  NMR ( $CDCl_3$ )  $\delta$  = 1.88 (d,  $J$  = 1.6 Hz, 3H), 2.01 (d,  $J$  = 4.8 Hz, 3H), 4.41 (t,  $J$  = 11.2 Hz, 1H), 4.74 (t,  $J$  = 11.2 Hz, 1H), 5.07 (d,  $J$  = 6.0 Hz, 2H), 7.18 ~ 7.59 (m, 11H), 7.75 (t,  $J$  = 8.4 Hz, 1H);  $^{19}F$  NMR ( $CDCl_3$ )  $\delta$  = -53.32 (d,  $J$  = 19.6 Hz, 3F), -50.79 (d,  $J$  = 12.4 Hz, 3F); IR (neat) 3031, 2932, 2853, 2270, 1727, 1592, 1495, 1448, 1375, 1353, 1302, 1277, 1222, 1148, 1079  $cm^{-1}$ .

**5-Trifluoromethyl-3-methyl-6,7-bis(trimethylsilyl)-3-phenyl-1,3-dihydroisobenzofuran (13c)**

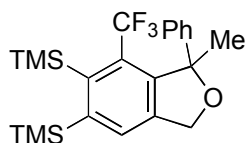

This compound could not be given in a pure form.

Yield : 10% ( $^{19}F$  NMR yield); HRMS (FAB) calcd for ( $M+Na$ )  $C_{22}H_{29}F_3NaOSi_2$ : 445.1606, Found 445.1607;  $^1H$  NMR ( $CDCl_3$ )  $\delta$  = 0.08 (s, 9H), 0.38 (s, 9H), 0.43 (s, 9H), 2.07 (s, 3H), 4.94 (d,  $J$  = 12.4 Hz, 1H), 5.01 (d,  $J$  = 12.8 Hz, 1H), 7.15 ~ 7.55 (m, 7H), 7.72 (s, 1H);  $^{19}F$  NMR ( $CDCl_3$ )  $\delta$  = -50.20 (s, 3F).

**5-Trifluoromethyl-6,7-dimethoxycarbonyl-3-methyl-3-phenyl-1,3-dihydroisobenzofuran (13d)**

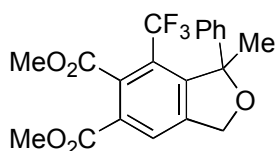

Yield : 47% ( $^{19}F$  NMR yield), 35% (isolated yield); HRMS (FAB) calcd for ( $M+H$ )  $C_{20}H_{18}F_3O_5$ : 395.1101, Found 395.1106;  $^1H$  NMR ( $CDCl_3$ )  $\delta$  = 2.04 (s, 3H), 3.94 (s, 6H), 5.06 (d,  $J$  = 13.2 Hz, 1H), 5.12 (d,  $J$  = 13.2 Hz, 1H), 7.16 ~ 7.19 (m, 2H), 7.26 ~ 7.32 (m, 3H), 8.11 (s, 1H);  $^{13}C$  NMR ( $CDCl_3$ )  $\delta$  = 24.07 (q,  $J$  = 3.2 Hz), 53.00, 53.13, 69.49, 90.94, 122.57 (q,  $J$  = 276.1 Hz), 123.78 (q,  $J$  = 33.0 Hz), 126.17, 126.34, 127.99, 128.12, 129.73, 134.36 (q,  $J$  = 2.5 Hz), 142.30 (q,  $J$  = 1.6 Hz), 144.21, 148.49 (q,  $J$  = 1.6 Hz), 164.74, 167.36;  $^{19}F$  NMR ( $CDCl_3$ )  $\delta$  = -54.26 (s, 3F); IR (neat) 2954, 2849, 1739, 1610, 1570, 1496, 1436,

1362, 1323, 1238, 1180, 1144, 1055, 1010, 972  $\text{cm}^{-1}$ .

**4,4,4-Trifluoro-1-methyl-1-phenylbut-2-ynyl 2,3,4,5-tetramethoxycarbonylbenzyl ether (16)**

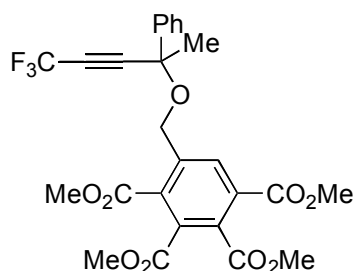

Yield : 41% ( $^{19}\text{F}$  NMR yield); HRMS (FAB) calcd for (M+H)  $\text{C}_{26}\text{H}_{24}\text{F}_3\text{O}_9$ : 537.1364, Found 537.1372;  $^1\text{H}$  NMR ( $\text{CDCl}_3$ )  $\delta$  = 1.84 (s, 3H), 3.81 (s, 3H), 3.85 (s, 3H), 3.92 (s, 3H), 3.93 (s, 3H), 4.32 (d,  $J$  = 12.8 Hz, 1H), 4.70 (d,  $J$  = 12.4 Hz, 1H), 7.34 ~ 7.43 (m, 3H), 7.50 ~ 7.52 (m, 2H), 8.14 (s, 1H);  $^{13}\text{C}$  NMR ( $\text{CDCl}_3$ )  $\delta$  = 23.16, 31.68, 52.74, 52.97, 52.99, 53.13, 64.37, 75.25 (q,  $J$  = 52.9 Hz), 76.38, 86.78 (q,  $J$  = 5.7 Hz), 113.99 (q,  $J$  = 257.9 Hz), 128.38, 128.85, 130.34, 130.41, 132.29, 134.46, 135.56, 138.08, 139.62, 164.93, 165.65, 166.59, 167.26;  $^{19}\text{F}$  NMR ( $\text{CDCl}_3$ )  $\delta$  = -50.71 (s, 3F); IR (neat) 2954, 2270, 1738, 1600, 1442, 1372, 1334, 1278, 1149, 1112, 1025, 998  $\text{cm}^{-1}$ .

**5-Trifluoromethyl-3-methyl-3,7-diphenyl-1,3-dihydroisobenzofuran (13e) and 5-Trifluoromethyl-3-methyl-3,6-diphenyl-1,3-dihydroisobenzofuran (14e)**

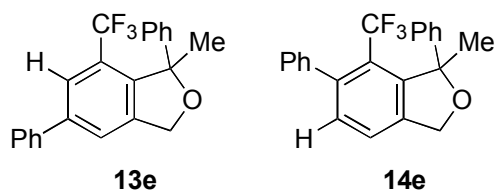

Combined yield : 99% ( $^{19}\text{F}$  NMR yield), 86% (isolated yield); Isomeric ratio (**13e** : **14e**) = 71 : 29 (inseparable); **13e** : HRMS (FAB) calcd for ( $\text{M}^+$ )  $\text{C}_{22}\text{H}_{17}\text{F}_3\text{O}$ : 354.1230, Found 354.1231;  $^1\text{H}$  NMR ( $\text{CDCl}_3$ )  $\delta$  = 2.06 (s, 3H), 5.13 (d,  $J$  = 12.8 Hz, 1H), 5.18 (d,  $J$  = 12.8 Hz, 1H), 7.27 ~ 7.51 (m, 8H), 7.61 ~ 7.63 (m, 2H), 7.67 (s, 1H), 7.78 (s, 1H);  $^{13}\text{C}$  NMR ( $\text{CDCl}_3$ )  $\delta$  = 24.62 (q,  $J$  = 4.1 Hz), 70.30, 89.78, 123.13, 124.86 (q,  $J$  = 245.5 Hz), 124.87 (q,  $J$  = 5.0 Hz), 125.62 (q,  $J$  = 32.2 Hz), 126.45, 127.16, 127.69, 127.93, 128.17, 129.04, 139.26, 141.91, 141.94, 143.47, 143.53;  $^{19}\text{F}$  NMR ( $\text{CDCl}_3$ )  $\delta$  = -58.11 (s, 3F); **14e** : HRMS (FAB) calcd for ( $\text{M}^+$ )  $\text{C}_{22}\text{H}_{17}\text{F}_3\text{O}$ : 354.1230, Found 354.1231;  $^1\text{H}$  NMR ( $\text{CDCl}_3$ )  $\delta$  = 2.11 (s, 3H), 5.08 (d,  $J$  = 12.8 Hz, 1H), 5.14 (d,  $J$  = 13.2 Hz, 1H), 7.26 ~ 7.79 (m, 12H);  $^{19}\text{F}$  NMR ( $\text{CDCl}_3$ )  $\delta$  =

-50.21 (s, 3F).

**5-Trifluoromethyl-3-methyl-3-phenyl-7-decyl-1,3-dihydroisobenzofuran (13f)** and  
**5-Trifluoromethyl-3-methyl-3-phenyl-6-decyl-1,3-dihydroisobenzofuran (14f)**

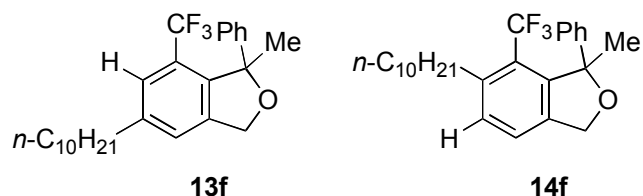

Combined yield : 87% ( $^{19}\text{F}$  NMR yield), 80% (isolated yield); Isomeric ratio (**13f** : **14f**) = 79 : 21 (inseparable); **13f** : HRMS (FAB) calcd for (M+Na)  $\text{C}_{26}\text{H}_{33}\text{F}_3\text{ONa}$ : 441.2378, Found 441.2381;  $^1\text{H}$  NMR ( $\text{CDCl}_3$ )  $\delta$  = 0.89 (t,  $J$  = 7.6 Hz, 4H), 1.27 ~ 1.34 (m, 13H), 1.62 ~ 1.67 (m, 2H), 2.01 (s, 3H), 2.69 (t,  $J$  = 8.4 Hz, 2H), 5.03 (d,  $J$  = 12.0 Hz, 1H), 5.09 (d,  $J$  = 12.4 Hz, 1H), 7.21 ~ 7.31 (m, 6H), 7.36 (s, 1H);  $^{13}\text{C}$  NMR ( $\text{CDCl}_3$ )  $\delta$  = 14.07, 22.66, 24.66 (q,  $J$  = 3.3 Hz), 29.30, 29.42, 29.52, 29.58, 31.29, 31.88, 35.50, 70.22, 89.66, 123.77 (q,  $J$  = 273.6 Hz), 124.47, 124.93 (q,  $J$  = 32.2 Hz), 125.84 (q,  $J$  = 5.7 Hz), 126.39, 127.52, 127.83, 140.35 (q,  $J$  = 2.5 Hz), 142.79, 143.65, 143.75 (q,  $J$  = 1.7 Hz);  $^{19}\text{F}$  NMR ( $\text{CDCl}_3$ )  $\delta$  = -58.03 (s, 3F); IR (neat) 2926, 2855, 1726, 1602, 1496, 1466, 1364, 1321, 1251, 1193, 1163, 1127, 1057  $\text{cm}^{-1}$ ; **14f** : HRMS (FAB) calcd for (M+Na)  $\text{C}_{26}\text{H}_{33}\text{F}_3\text{ONa}$ : 441.2392, Found 441.2381;  $^1\text{H}$  NMR ( $\text{CDCl}_3$ )  $\delta$  = 0.88 (t,  $J$  = 6.8 Hz, 4H), 1.20 ~ 1.40 (m, 13H), 1.55 ~ 1.63 (m, 2H), 2.02 (s, 3H), 2.75 (t,  $J$  = 8.0 Hz, 2H), 5.04 (d,  $J$  = 5.2 Hz, 2H), 7.20 ~ 7.36 (m, 7H);  $^{19}\text{F}$  NMR ( $\text{CDCl}_3$ )  $\delta$  = -52.76 (s, 3F).

**5-Trifluoromethyl-3-methyl-7-trimethylsilyl-3-phenyl-1,3-dihydroisobenzofuran (13g)**

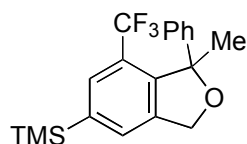

Yield : 16% ( $^{19}\text{F}$  NMR yield); HRMS (FAB) calcd for ( $\text{M}^+$ )  $\text{C}_{19}\text{H}_{21}\text{F}_3\text{OSi}$ : 350.1321, Found 350.1314;  $^1\text{H}$  NMR ( $\text{CDCl}_3$ )  $\delta$  = 0.01 (s, 9H), 1.69 (s, 3H), 4.75 (d,  $J$  = 13.2 Hz, 1H), 4.80 (d,  $J$  = 12.8 Hz, 1H), 6.89 ~ 6.99 (m, 5H), 7.28 (s, 1H), 7.34 (s, 1H);  $^{19}\text{F}$  NMR ( $\text{CDCl}_3$ )  $\delta$  = -57.82 (s, 3F).

**5-Trifluoromethyl-3,6-dimethyl-3,7-diphenyl-1,3-dihydroisobenzofuran (13h)** and  
**5-Trifluoromethyl-3,7-dimethyl-3,6-diphenyl-1,3-dihydroisobenzofuran (14h)**

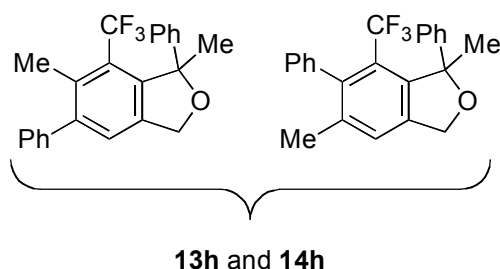

Combined yield : 48% (<sup>19</sup>F NMR yield); Isomeric ratio (**13h** : **14h**) = 60 : 40 (inseparable); (Isomer 1) HRMS (FAB) calcd for (M<sup>+</sup>) C<sub>23</sub>H<sub>19</sub>F<sub>3</sub>O: 368.1378, Found 368.1388; <sup>1</sup>H NMR (CDCl<sub>3</sub>) δ = 2.07 (s, 3H), 2.33 (s, 3H), 5.06 (d, *J* = 12.4 Hz, 1H), 5.10 (d, *J* = 12.0 Hz, 1H), 7.26 ~ 7.48 (m, 11H); <sup>19</sup>F NMR (CDCl<sub>3</sub>) δ = -54.13 (s, 3F); (Isomer 2) HRMS (FAB) calcd for (M<sup>+</sup>) C<sub>23</sub>H<sub>19</sub>F<sub>3</sub>O: 368.1383, Found 368.1388; <sup>1</sup>H NMR (CDCl<sub>3</sub>) δ = 2.02 (s, 3H), 2.07 (s, 3H), 5.07 (d, *J* = 12.8 Hz, 1H), 5.12 (d, *J* = 12.8 Hz, 1H), 7.14 ~ 7.61 (m, 11H); <sup>19</sup>F NMR (CDCl<sub>3</sub>) δ = -50.57 (s, 3F).

**5-Trifluoromethyl-3,3,6,7-tetraphenyl-1,3-dihydroisobenzofuran (17)**

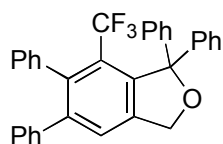

Yield : 55% (<sup>19</sup>F NMR yield); HRMS (FAB) calcd for (M+H) C<sub>33</sub>H<sub>24</sub>F<sub>3</sub>O: 493.1778, Found 493.1779; <sup>1</sup>H NMR (CDCl<sub>3</sub>) δ = 4.96 (s, 2H), 7.00 ~ 7.07 (m, 4H), 7.13 ~ 7.15 (m, 6H), 7.35 (s, 10H), 7.49 (s, 1H); <sup>19</sup>F NMR (CDCl<sub>3</sub>) δ = -49.23 (s, 3F).

**5-Difluoromethyl-3-methyl-3,6,7-triphenyl-1,3-dihydroisobenzofuran (18)**

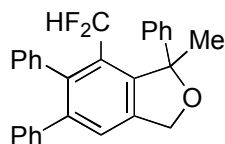

Yield : 53% (<sup>19</sup>F NMR yield), 39% (isolated yield); HRMS (FAB) calcd for (M<sup>+</sup>) C<sub>28</sub>H<sub>22</sub>F<sub>2</sub>O: 412.1635, Found 412.1639; <sup>1</sup>H NMR (CDCl<sub>3</sub>) δ = 2.17 (s, 3H), 5.16 (d, *J* = 12.0 Hz, 1H), 5.20 (d, *J* = 12.4 Hz, 1H), 6.29 (t, *J* = 54.0 Hz, 1H), 6.86 (s, 1H), 7.00 ~ 7.06 (m, 3H), 7.12 ~ 7.39 (m, 11H), 7.43 (s, 1H); <sup>13</sup>C NMR

(CDCl<sub>3</sub>)  $\delta$  = 25.67 (t,  $J$  = 1.6 Hz), 70.35, 90.16, 113.50 (t,  $J$  = 238.9 Hz), 124.78, 126.43, 126.54 (t,  $J$  = 139.7 Hz), 126.62, 127.20, 127.44, 127.48, 127.61, 128.03, 129.65, 130.74, 131.06, 131.39, 137.46, 140.60, 141.17, 142.91, 144.20; <sup>19</sup>F NMR (CDCl<sub>3</sub>)  $\delta$  = -108.38 (dd,  $J$  = 53.8, 309.9 Hz, 1F), -103.58 (dd,  $J$  = 53.8, 300.1 Hz, 1F); IR (neat) 2345, 1655, 1638, 1037, 766 cm<sup>-1</sup>.

### 5-Trifluoromethyl-6,7-diphenyl-1,3-dihydroisobenzofuran-3-spiro-cyclohexane (19)

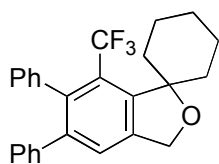

Yield : 71% (<sup>19</sup>F NMR yield), 53% (isolated yield); m.p. 139~140 °C; HRMS (FAB) calcd for (M+Na) C<sub>26</sub>H<sub>23</sub>F<sub>3</sub>NaO: 431.1606, Found 431.1599; <sup>1</sup>H NMR (CDCl<sub>3</sub>)  $\delta$  = 1.26 ~ 1.34 (m, 2H), 1.68 ~ 1.91 (m, 6H), 2.13 ~ 2.21 (m, 2H), 5.06 (s, 2H), 6.91 ~ 6.94 (m, 2H), 7.02 ~ 7.05 (m, 2H), 7.10 ~ 7.12 (m, 3H), 7.13 ~ 7.16 (m, 3H), 7.36 (s, 1H); <sup>13</sup>C NMR (CDCl<sub>3</sub>)  $\delta$  = 22.78, 24.90, 33.28 (q,  $J$  = 4.1 Hz), 68.83, 90.35, 124.15 (q,  $J$  = 29.1 Hz), 124.45 (q,  $J$  = 276.1 Hz), 125.92, 126.50, 126.75, 126.96, 127.43, 129.53, 130.43 (q,  $J$  = 1.6 Hz), 138.64, 139.56 (q,  $J$  = 2.5 Hz), 140.64, 141.56, 143.38, 144.26 (q,  $J$  = 2.4 Hz); <sup>19</sup>F NMR (CDCl<sub>3</sub>)  $\delta$  = -48.00 (s, 3F); IR (KBr) 2954, 2812, 2345, 1655, 1543, 1509, 1165, 1120 cm<sup>-1</sup>.

The compound **22** could not be isolated in a pure form. <sup>1</sup>H NMR (CDCl<sub>3</sub>)  $\delta$  = 4.22 (1H), 4.63 (1H), 4.94 ~ 4.96 (2H), 6.84 ~ 7.35 (m, 22H).

### 7-(4,4,4-Trifluoro-1,1-diphenyl)but-2-ynyl-5-Trifluoromethyl-3,3-phenyl-1,3-dihydroisobenzofuran (22)

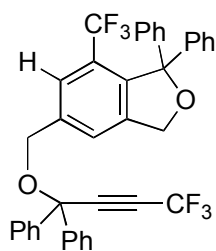

The determination of the chemical structure was carried out mainly on the basis of the analogy of the chemical shift of **15a** due to their structural similarities.

Yield : 19% (<sup>19</sup>F NMR yield); <sup>19</sup>F NMR (CDCl<sub>3</sub>)  $\delta$  = -57.61 (s, 3F), -50.63 (s, 3F).

**6-(4,4,4-Trifluoro-1,1-diphenyl)but-2-ynyl-5-Trifluoromethyl-3,3-phenyl-1,3-dihydroisobenzofuran (23)**

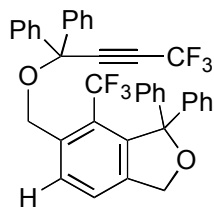

This compound could not be isolated in a pure form. The determinations of the chemical structures were carried out on the basis of the analogy of the chemical shift of **15b** due to their structural similarities.

Yield : 8% ( $^{19}\text{F}$  NMR yield);  $^{19}\text{F}$  NMR ( $\text{CDCl}_3$ )  $\delta = -52.60$  (s, 3F),  $-50.71$  (s, 3F).

**4,4,4-Trifluoro-1,1-phenylbut-2-ynyl 2,3,4,5-tetraphenylbenzyl ether (24)**

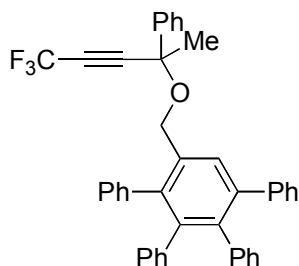

Yield : 16% ( $^{19}\text{F}$  NMR yield); HRMS (FAB) calcd for ( $\text{M}^+$ )  $\text{C}_{47}\text{H}_{33}\text{F}_3\text{O}$ : 670.2485, Found 670.2484;  $^1\text{H}$  NMR ( $\text{CDCl}_3$ )  $\delta = 4.36$  (s, 2H), 6.75 ~ 7.39 (m, 30H), 7.63 (s, 1H);  $^{19}\text{F}$  NMR ( $\text{CDCl}_3$ )  $\delta = -50.51$  (s, 3F); IR (neat) 2345, 1638, 1449, 1263, 1093, 803  $\text{cm}^{-1}$ .

**General procedure for fluoroalkylated 1,3-dihydrofuro[3,4-c]pyridine derivatives**

To a suspension of  $\text{RhCl}_3 \cdot 3\text{H}_2\text{O}$  (8 mg, 0.03 mmol) were added *i*- $\text{Pr}_2\text{NEt}$  (14 mg, 0.09 mmol) and fluoroalkylated diynes (0.30 mmol), nitriles (6.0 mmol). The mixture was stirred at 130  $^\circ\text{C}$  (bath temp.) for 2 h. After being cooled to room temperature, the residue was purified by column chromatography on silica gel (EtOAc/Hexane) to afford corresponding fluoroalkylated 1,3-dihydrofuro[3,4-c]pyridine derivatives.

#### 4-Trifluoromethyl-2-methyl-2,6-diphenyl-1,3-dihydrofuro[3,4-c]pyridine (25)

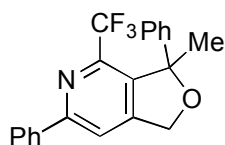

Yield : 39% ( $^{19}\text{F}$  NMR yield), 25% (isolated yield); HRMS (FAB) calcd for (M+H)  $\text{C}_{21}\text{H}_{17}\text{F}_3\text{NO}$ : 356.1266, Found 356.1262;  $^1\text{H}$  NMR ( $\text{CDCl}_3$ )  $\delta$  = 2.07 (s, 3H), 5.15 (d,  $J$  = 14.0 Hz, 1H), 5.20 (d,  $J$  = 14.0 Hz, 1H), 7.26 ~ 7.33 (m, 5H), 7.47 ~ 7.53 (m, 3H), 7.86 (s, 1H), 8.08 ~ 8.11 (m, 2H);  $^{13}\text{C}$  NMR ( $\text{CDCl}_3$ )  $\delta$  = 24.72 (q,  $J$  = 3.3 Hz), 69.95, 89.28, 115.59, 121.25 (q,  $J$  = 274.4 Hz), 126.31, 127.12, 128.01, 128.13, 128.93, 129.89, 137.37, 138.03, 142.76, 154.12, 156.60;  $^{19}\text{F}$  NMR ( $\text{CDCl}_3$ )  $\delta$  = -63.68 (s, 3F); IR (neat) 2927, 2345, 1719, 1610, 1446, 1375, 1261, 1224, 1191, 1136, 1049  $\text{cm}^{-1}$ .

#### 6-(4-methylphenyl)-4-trifluoromethyl-2-methyl-2-diphenyl-1,3-dihydrofuro[3,4-c]pyridine (26)

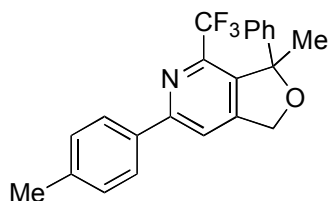

Yield : 44% ( $^{19}\text{F}$  NMR yield), 43% (isolated yield);  $^1\text{H}$  NMR ( $\text{CDCl}_3$ )  $\delta$  = 2.07 (s, 3H), 2.44 (s, 3H), 5.13 (d,  $J$  = 14.0 Hz, 1H), 5.18 (d,  $J$  = 14.0 Hz, 1H), 7.26 ~ 7.36 (m, 7H), 7.83 (s, 1H), 8.00 (d,  $J$  = 8.0 Hz, 2H);  $^{13}\text{C}$  NMR ( $\text{CDCl}_3$ )  $\delta$  = 21.33, 24.74 (q,  $J$  = 2.4 Hz), 69.95, 89.26, 115.19, 121.28 (q,  $J$  = 275.2 Hz), 1256.31, 127.00, 127.99, 128.11, 129.66, 134.62, 137.67, 140.08, 141.83, 142.83, 153.99, 156.62;  $^{19}\text{F}$  NMR ( $\text{CDCl}_3$ )  $\delta$  = -63.68 (s, 3F); IR (neat) 2923, 2372, 1609, 1560, 1446, 1376, 1325, 1224, 1190, 1136, 1047  $\text{cm}^{-1}$ .

#### 6-Buthyl-4-trifluoromethyl-2-methyl-2-diphenyl-1,3-dihydrofuro[3,4-c]pyridine (27)

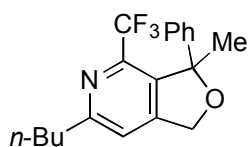

This compound could not be isolated in a pure form. The mixture of **27** and **15b** was obtained.

Yield : 10% ( $^{19}\text{F}$  NMR yield); HRMS (FAB) calcd for (M+H)  $\text{C}_{19}\text{H}_{21}\text{F}_3\text{NO}$ : 336.1576, Found 336.1575;  $^1\text{H}$  NMR ( $\text{CDCl}_3$ )  $\delta$  = 0.98 (t,  $J$  = 7.2 Hz, 3H), 1.41 ~ 1.47 (m, 3H), 1.73 ~ 1.80 (m, 3H), 2.02 (t,  $J$  = 1.6



Hz, 3H), 2.91 (t,  $J = 8.4$  Hz, 2H), 7.18 ~ 7.49 (m, 6H);  $^{19}\text{F}$  NMR ( $\text{CDCl}_3$ )  $\delta = -63.49$  (s, 3F).

7.431  
7.426  
7.414  
7.409  
7.384  
7.364  
7.301  
7.281  
7.260  
7.226  
7.205  
7.167  
7.161  
7.156  
7.149  
7.144  
7.139  
7.133  
7.128  
6.928  
6.907  
6.899  
6.893  
6.871  
5.300

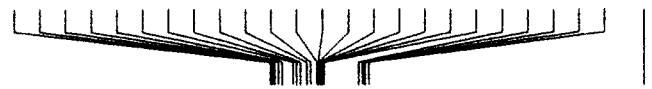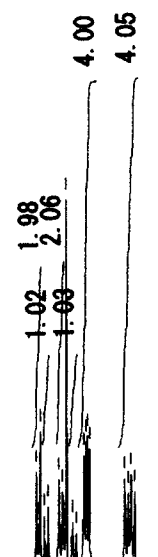

10.0 9.0 8.0 7.0 6.0 5.0 4.0 3.0 2.0 PPM

```

MENUF 1H
OBNUC 1H
OFR 399.65 MHz
OBSET 135.40 KHz
OBF IN 24.90 Hz
PW1 5.20 usec
DEADT 72.40 usec
PREDL 0.20000 msec
IWT 1.0000 msec
POINT 16384
SPO 16384
TIMES 8
DUMMY 1
FREQU 7992.01 Hz
FLT 4000 Hz
DELAY 50.00 usec
ACQTM 2.0501 sec
PD 4.9500 sec
ADBIT 16
RGAIN 22
BF 0.10 Hz
T1 0.00
T2 0.00
T3 90.00
T4 100.00
EXMOD NON
EXPCM NON:Single.coupled:PW1_ACQTM
IRNUC 1H
IFR 399.65 MHz
IRSET 136.90 KHz
IRFIN 97.50 Hz
IRRPW 45 usec
IRATN 511
DFILE trimer-p-Cl(1H).als
SF TH5ATFG2
LKSET 61.60 KHz
LKFIN 79.0 Hz
LKLEV 180
LGA IN 23
LKPHS 219
LKSIG 1007
CSPED 12 Hz
FILDC
FILDF
  
```

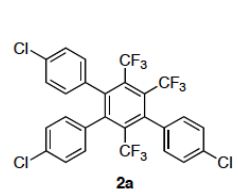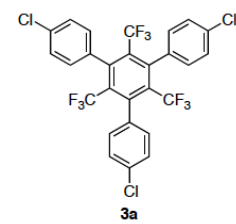

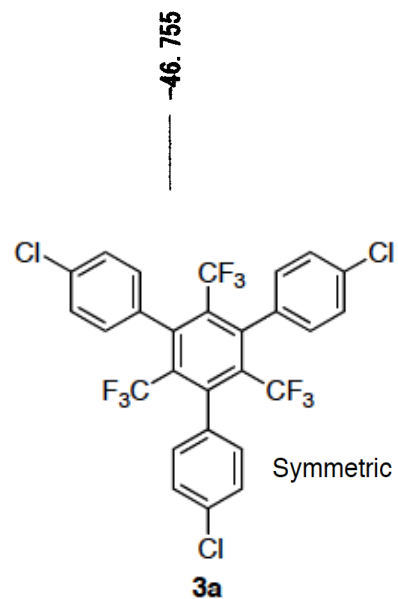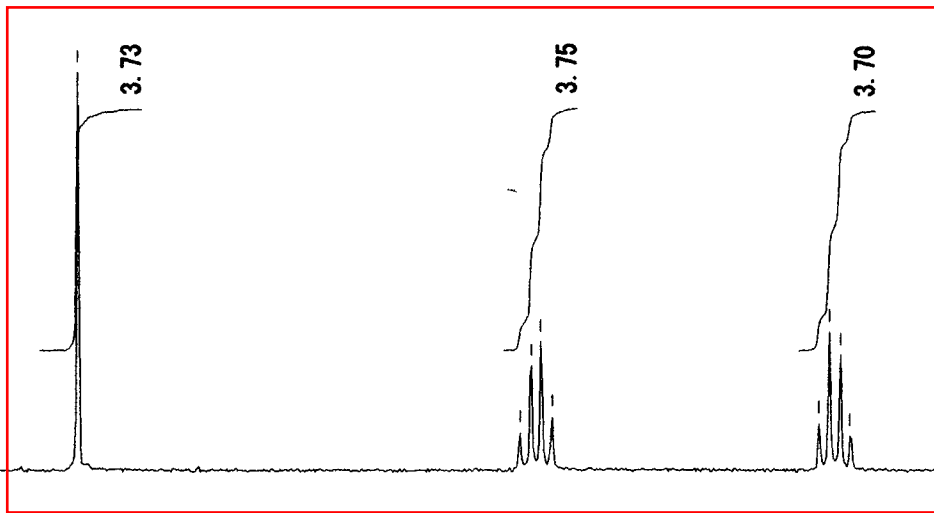

-50.0

PPM

```

MENUF 19F
OBNUC 19F
OFR 376.05 MHz
OBSET 139.60 KHz
OBFIN 36.10 Hz
PW1 6.00 usec
DEADT 10.00 usec
PREDL 0.20000 msec
IWT 1.0000 msec
POINT 32768
SPO 32768
TIMES 16
DUMMY 1
FREQU 80000.00 Hz
FLT 40000 Hz
DELAY 5.00 usec
ACQTM 0.4096 sec
PD 4.9500 sec
ADBIT 16
RGAIN 14
BF 0.10 Hz
T1 0.00
T2 0.00
T3 90.00
T4 100.00
EXMOD NON
EXPCM NON:Single.coupled:PW1_ACQTM
IRNUC 1H
IFR 399.65 MHz
IRSET 124.00 KHz
IRFIN 10500.00 Hz
IRRPW 45 usec
IRATN 511
DFILE 3 量体-p-Cl (19F).als
SF TH5ATFG2
LKSET 61.60 KHz
LKFIN 79.0 Hz
LKLEV 180
LGAIN 23
LKPHS 219
LKSIG 1003
CSPED 15 Hz
FILDC
FILDF
  
```

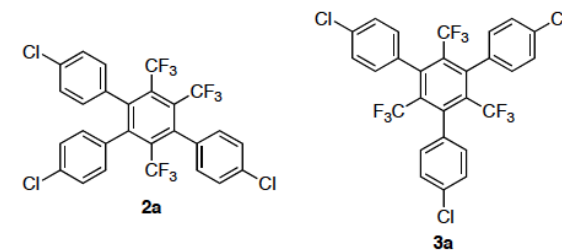

7.464  
7.460  
7.452  
7.449  
7.447  
7.441  
7.436  
7.431  
7.428  
7.421  
7.417  
7.413  
7.409  
7.399  
7.395  
7.391  
7.384  
7.381  
7.378  
7.372  
7.366  
7.358  
7.321  
7.316  
7.303  
7.260  
7.126  
7.120  
7.109  
7.104  
7.100  
7.093  
7.083  
7.065  
7.009  
7.004  
6.995  
6.984  
6.973  
6.966  
6.956  
6.949

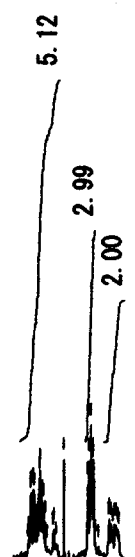

```

MENUF 1H
OBNUC 1H
OFR      399.65 MHz
OBSET    135.40 KHz
OBF IN   24.90 Hz
PW1      5.20 usec
DEADT    72.40 usec
PREDL    0.20000 msec
IWT      1.0000 msec
POINT    16384
SPO      16384
TIMES    8
DUMMY    1
FREQU    7992.01 Hz
FLT      4000 Hz
DELAY    50.00 usec
ACQTM    2.0501 sec
PD       4.9500 sec
ADBIT    16
RGAIN    17
BF       0.10 Hz
T1       0.00
T2       0.00
T3       90.00
T4       100.00
EXMOD    NON
EXPCM    NON:Single.coupled:PW1_ACQTM
IRNUC    1H
IFR      399.65 MHz
IRSET    136.90 KHz
IRF IN   97.50 Hz
IRRPW    45 usec
IRATN    511
DFILE    3置体-Ph(1H).als
SF       TH5ATFG2
LKSET    61.60 KHz
LKFIN    79.0 Hz
LKLEV    180
LGAIN    24
LKPHS    219
LKSIG    1638
CSPED    11 Hz
FILDC
FILDF
  
```

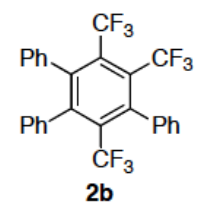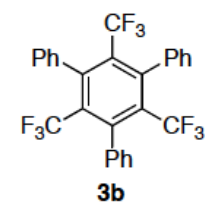

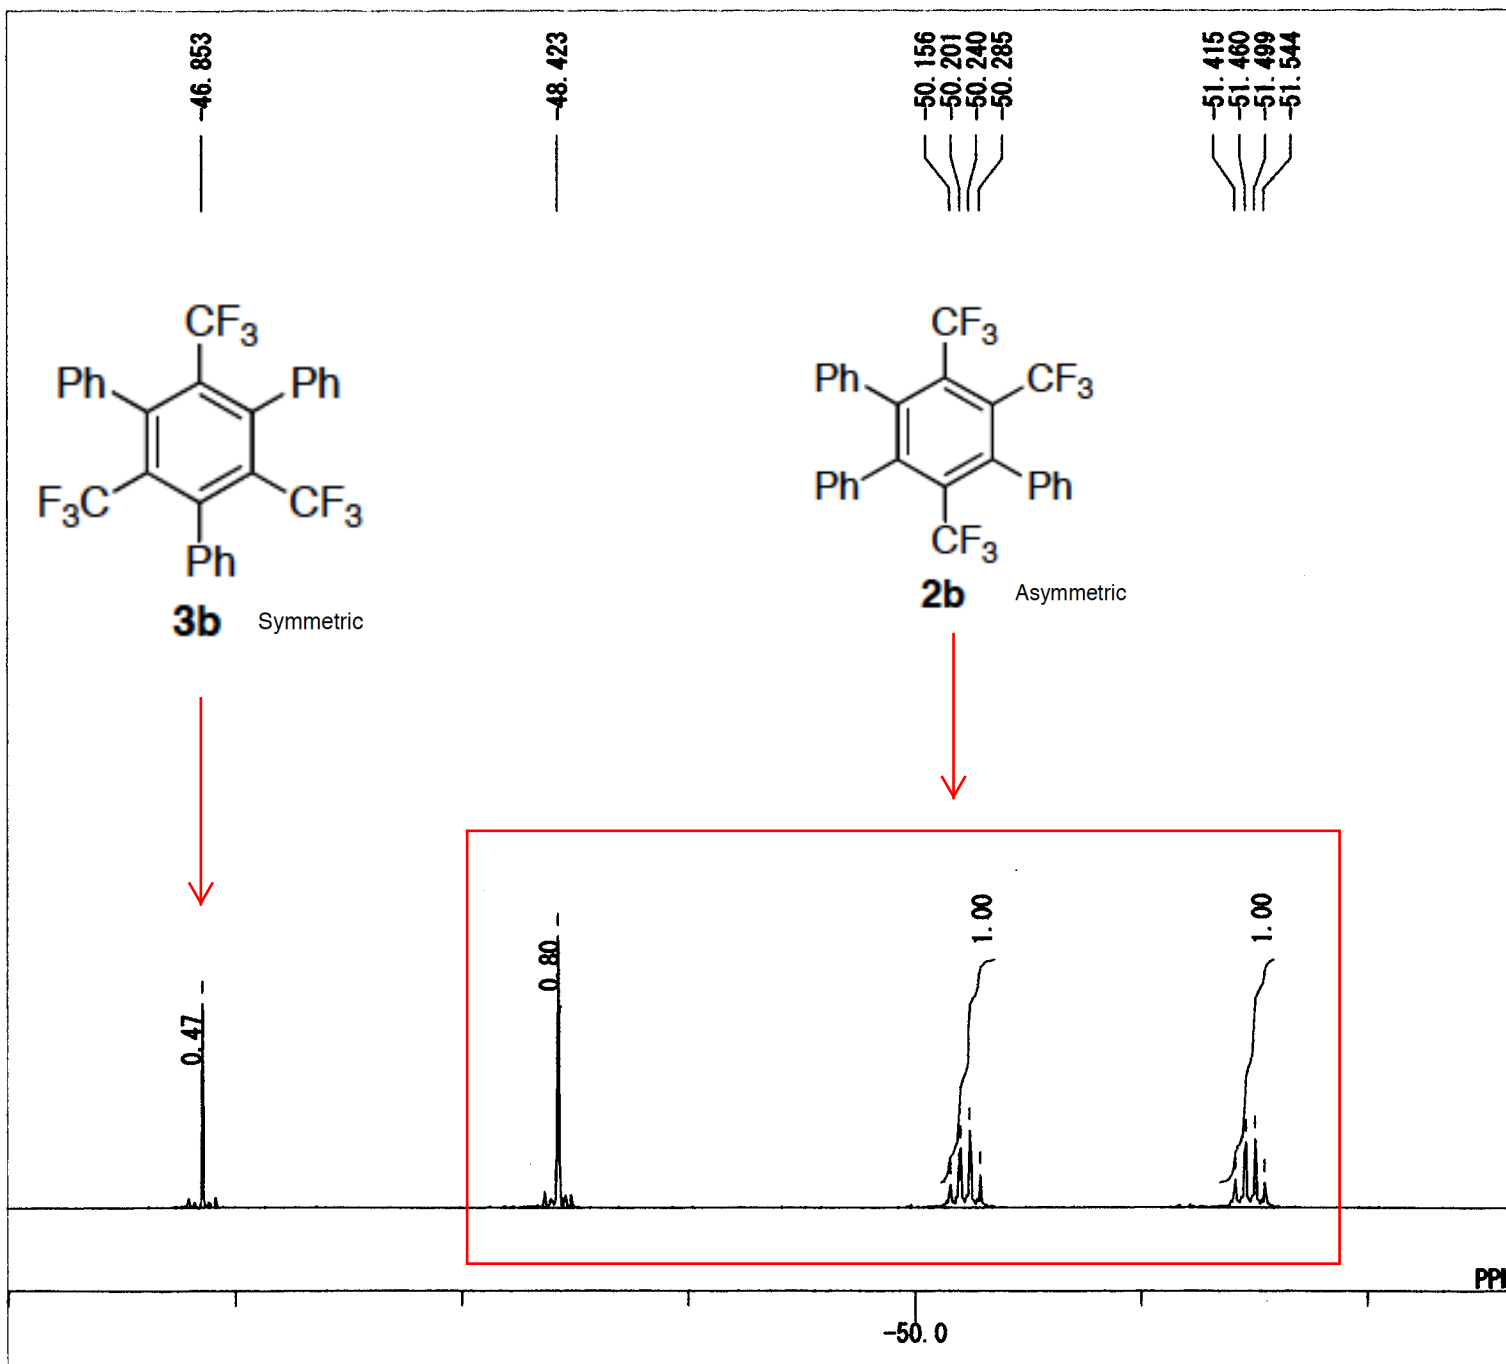

```

MNUF 19F
OBNUC 19F
OFR 376.05 MHz
OBSET 139.60 KHz
OBF IN 36.10 Hz
PW1 6.00 usec
DEADT 10.00 usec
PREDL 0.20000 msec
IWT 1.0000 msec
POINT 32768
SPO 32768
TIMES 16
DUMMY 1
FREQU 80000.00 Hz
FLT 40000 Hz
DELAY 5.00 usec
ACQTM 0.4096 sec
PD 4.9500 sec
ADBIT 16
RGAIN 14
BF 0.10 Hz
T1 0.00
T2 0.00
T3 90.00
T4 100.00
EXMOD NON
EXPCM NON:Single.coupled:PW1_ACQTM
IRNUC 1H
IFR 399.65 MHz
IRSET 124.00 KHz
IRFIN 10500.00 Hz
IRRPW 45 usec
IRATN 511
DFILE 3-量体-Ph(19F).als
SF TH5ATFG2
LKSET 61.60 KHz
LKFIN 79.0 Hz
LKLEV 180
LGAIN 24
LKPHS 219
LKSIG 1675
CSPED 12 Hz
FILDC
FILDF
  
```

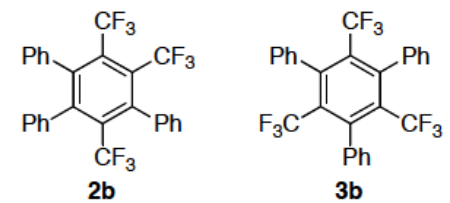

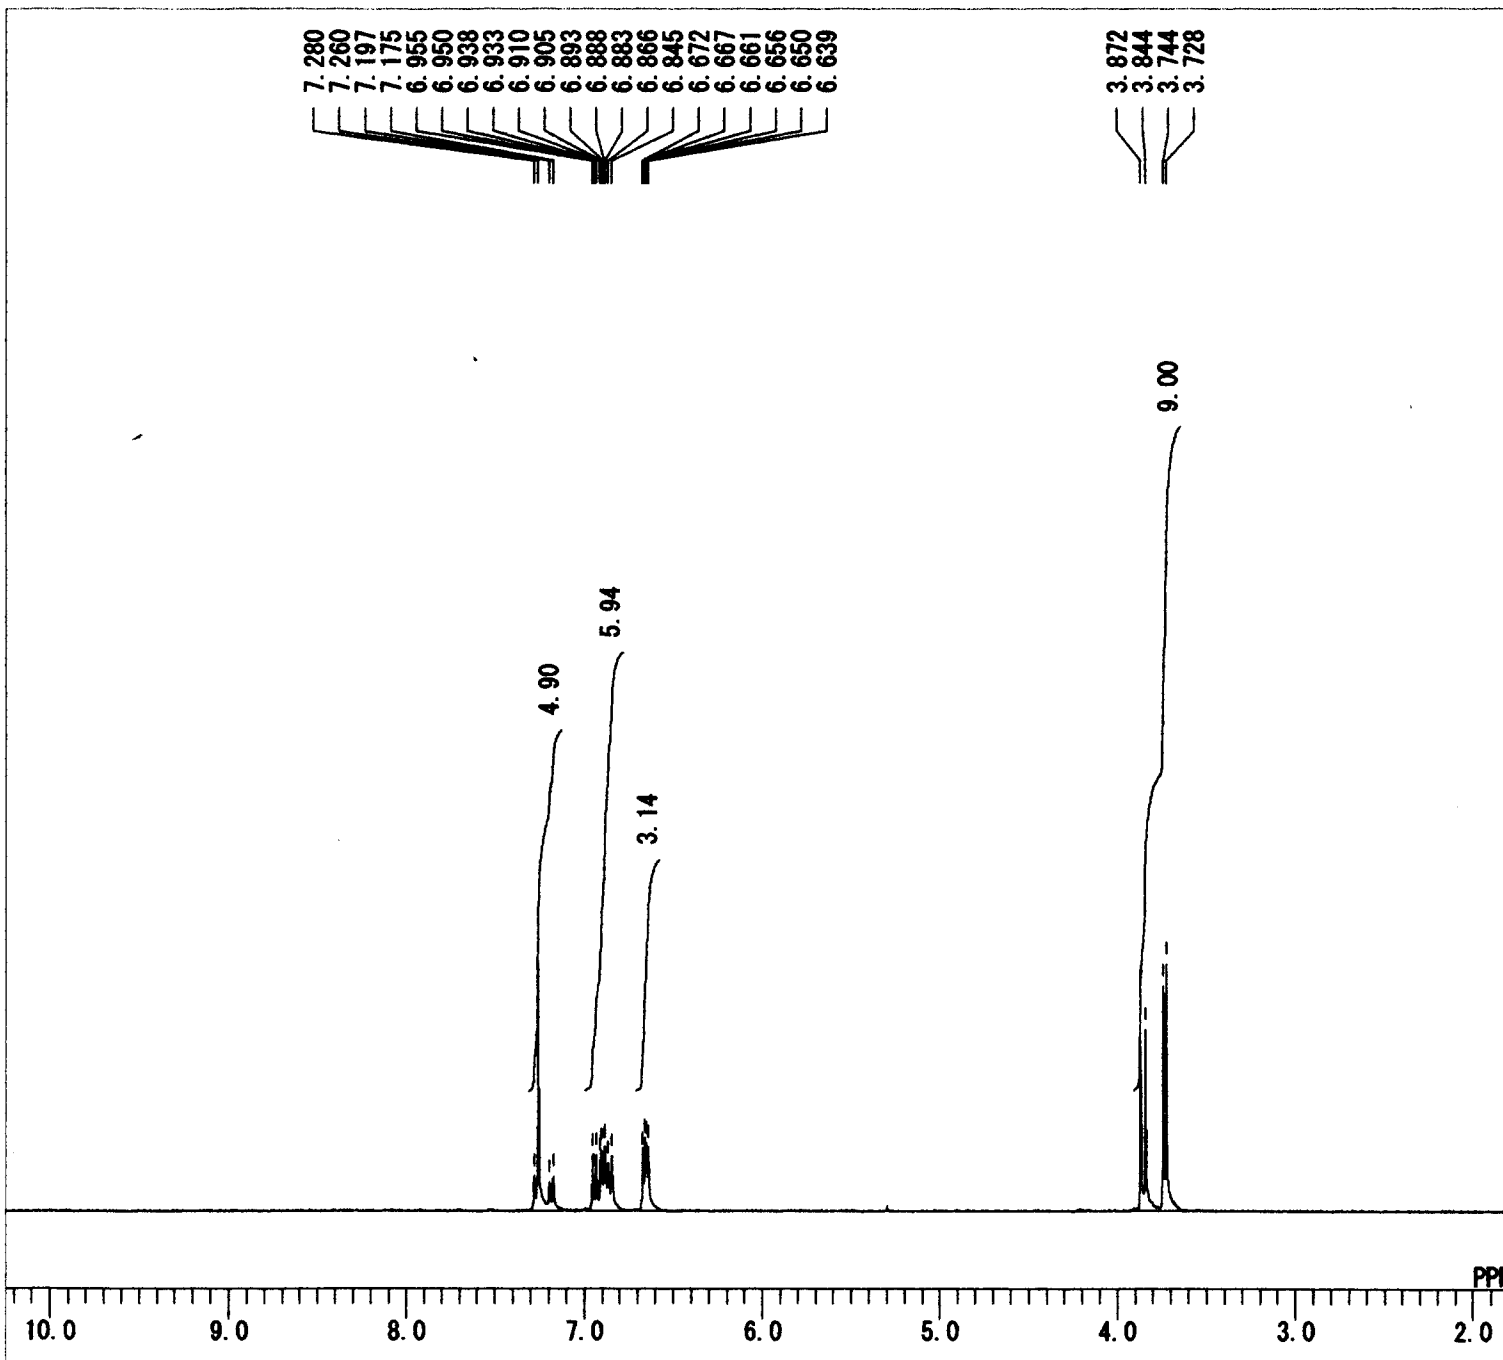

```

MENUMF 1H
OBNUC 1H
OFR 399.65 MHz
OBSET 135.40 KHz
OBFIN 24.90 Hz
PW1 5.20 usec
DEADT 72.40 usec
PREDL 0.20000 msec
IWT 1.0000 msec
POINT 16384
SPO 16384
TIMES 8
DUMMY 1
FREQU 7992.01 Hz
FLT 4000 Hz
DELAY 50.00 usec
ACQTM 2.0501 sec
PD 4.9500 sec
ADBIT 16
RGAIN 21
BF 0.10 Hz
T1 0.00
T2 0.00
T3 90.00
T4 100.00
EXMOD NON
EXPCM NON:Single.coupled:PW1_ACQTM
IRNUC 1H
IFR 399.65 MHz
IRSET 136.90 KHz
IRFIN 97.50 Hz
IRRPW 45 usec
IRATN 511
DFILE 3置体-Ph-OMe(1H).als
SF TH5ATFG2
LKSET 61.60 KHz
LKFIN 79.0 Hz
LKLEV 180
LGAIN 22
LKPHS 219
LKSIG 588
CSPED 13 Hz
FILDC
FILDF

```

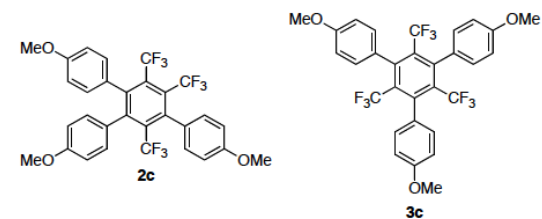

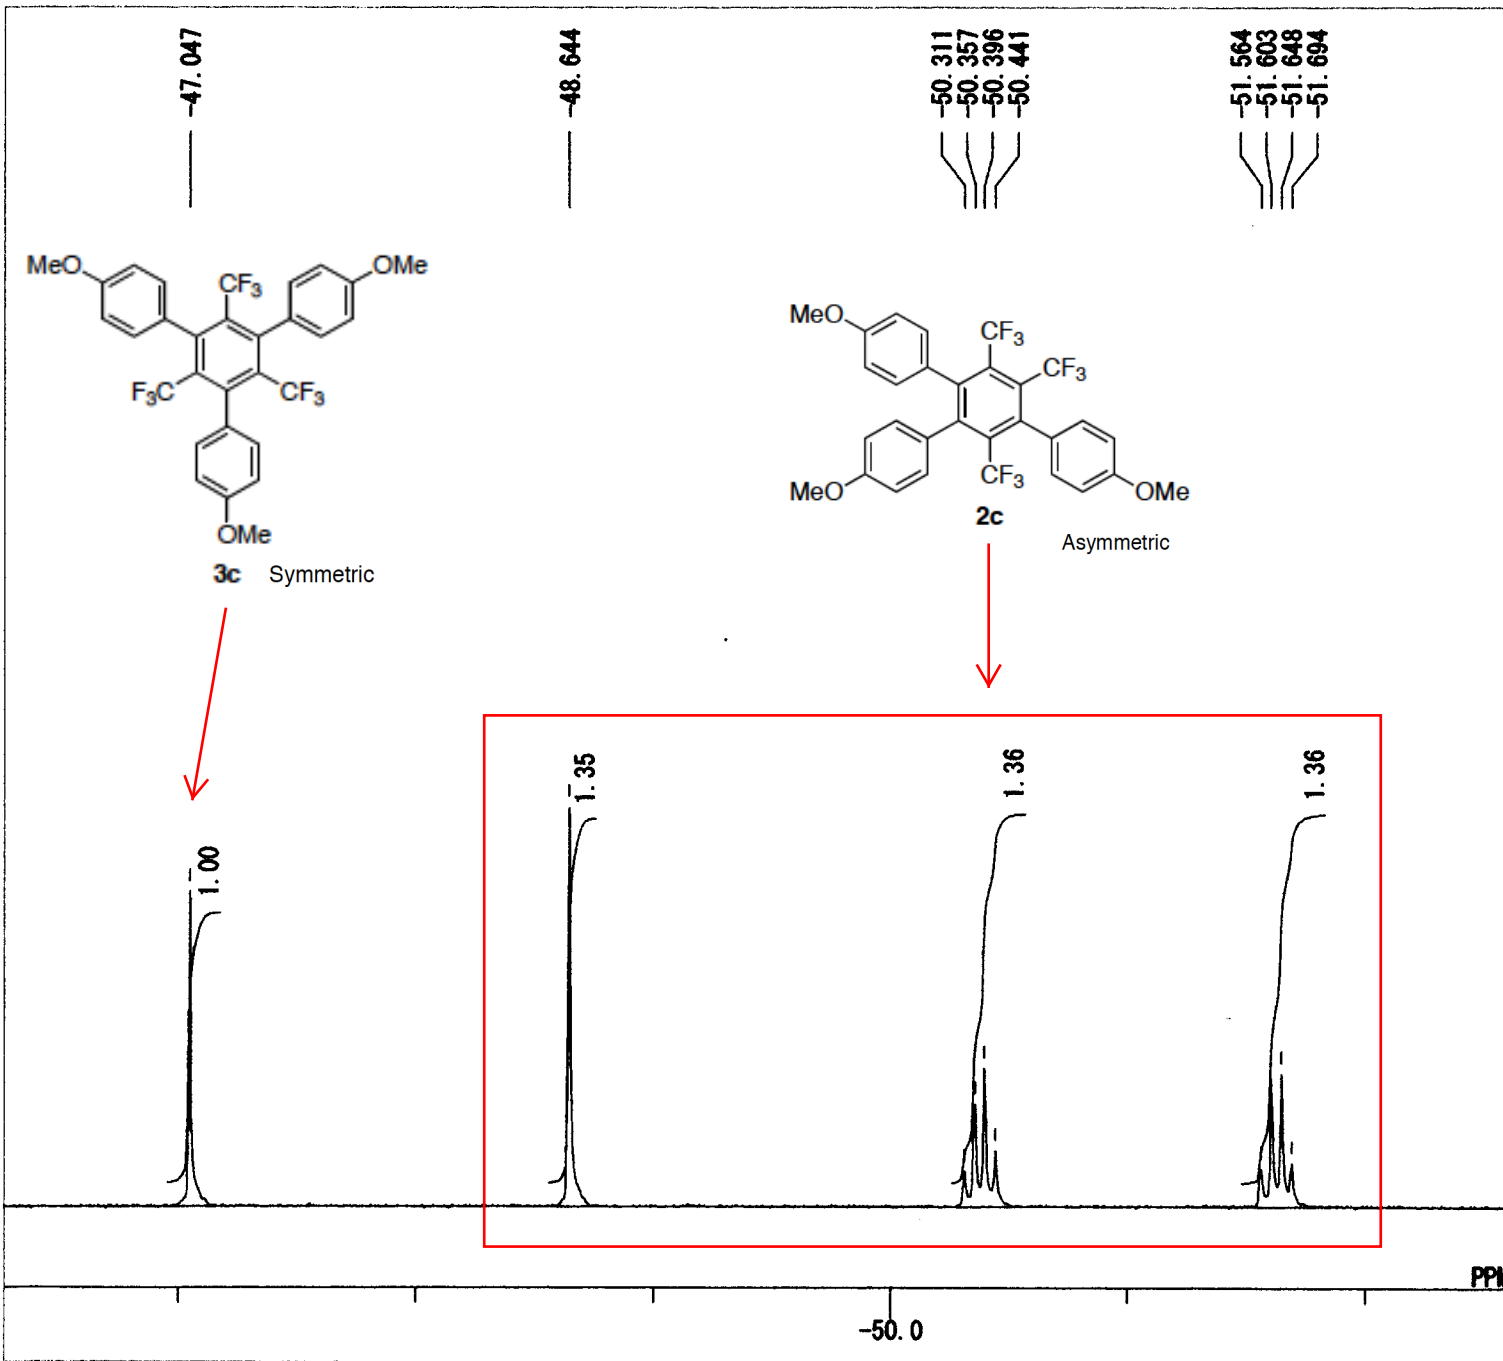

```

MENUF 19F
OBNUC 19F
OFR 376.05 MHz
OBSET 139.60 KHz
OBFIN 36.10 Hz
PW1 6.00 usec
DEADT 10.00 usec
PREDL 0.20000 msec
IWT 1.0000 msec
POINT 32768
SPO 32768
TIMES 16
DUMMY 1
FREQU 80000.00 Hz
FLT 40000 Hz
DELAY 5.00 usec
ACQTM 0.4096 sec
PD 4.9500 sec
ADBIT 16
RGAIN 14
BF 0.10 Hz
T1 0.00
T2 0.00
T3 90.00
T4 100.00
EXMOD NON
EXPCM NON:Single.coupled:PW1_ACQTM
IRNUC 1H
IFR 399.65 MHz
IRSET 124.00 KHz
IRFIN 10500.00 Hz
IRRPW 45 usec
IRATN 511
DFILE 3-置体-Ph-OMe(19F).als
SF TH5ATFG2
LKSET 61.60 KHz
LKFIN 79.0 Hz
LKLEV 180
LGAIN 22
LKPHS 219
LKSIG 588
CSPED 13 Hz
FILDC
FILDF
  
```

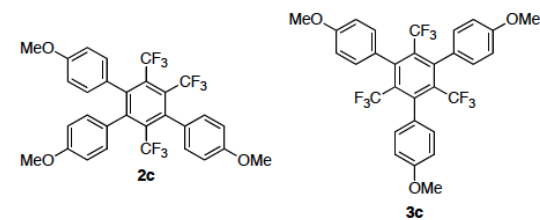

8.139  
8.119  
7.833  
7.820  
7.812  
7.800  
7.478  
7.458  
7.260  
7.259  
7.108  
7.088  
7.075  
7.054

4.431  
4.413  
4.348  
4.335  
4.330  
4.318

1.561  
1.555  
1.447  
1.429  
1.409  
1.395  
1.390  
1.383  
1.378  
1.366  
1.360  
1.348

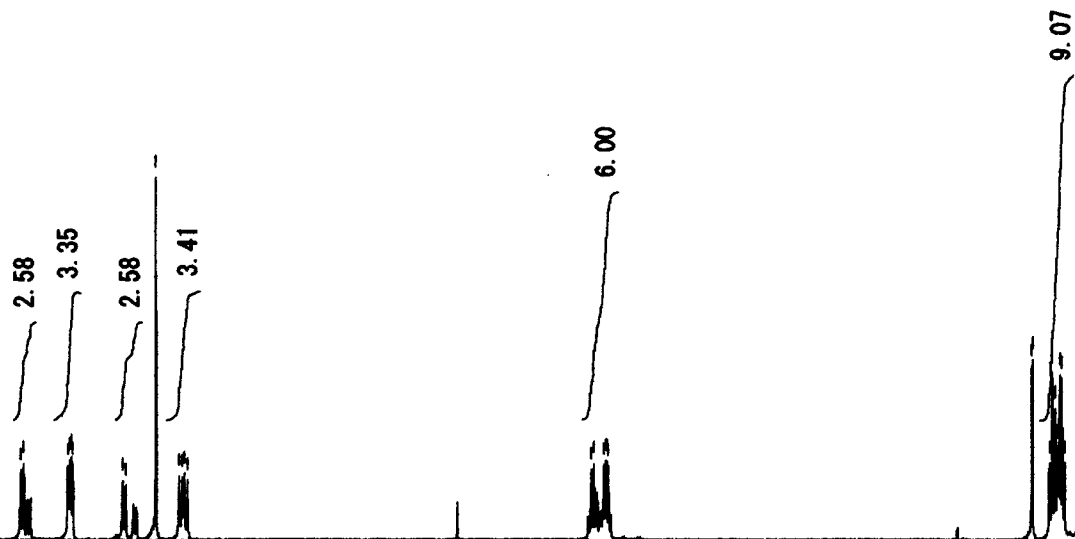

MENUF 1H  
OBNUC 1H  
OFR 399.65 MHz  
OBSET 135.40 KHz  
OBFIN 24.90 Hz  
PW1 5.20 usec  
DEADT 72.40 usec  
PREDL 0.20000 msec  
IWT 1.0000 msec  
POINT 65536  
SPO 16384  
TIMES 8  
DUMMY 1  
FREQU 7992.01 Hz  
FLT 4000 Hz  
DELAY 50.00 usec  
ACQTM 2.0501 sec  
PD 4.9500 sec  
ADBIT 16  
RGAIN 22  
BF 0.10 Hz  
T1 0.00  
T2 0.00  
T3 90.00  
T4 100.00  
EXMOD NON  
EXPCM NON:Single.coupled:PW1\_ACQTM  
IRNUC 1H  
IFR 399.65 MHz  
IRSET 136.90 KHz  
IRFIN 97.50 Hz  
IRRPW 45 usec  
IRATN 511  
DFILE 3-量体-Ph-CO2Et(1H).als  
SF TH5ATFG2  
LKSET 61.60 KHz  
LKFIN 79.0 Hz  
LKLEV 180  
LGAIN 24  
LKPHS 219  
LKSIG 1088  
CSPED 9 Hz  
FILDC  
FILDF

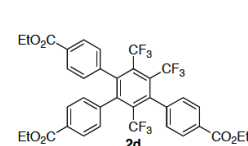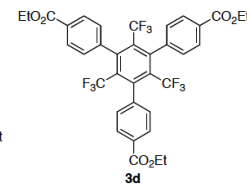

10.0

PPM



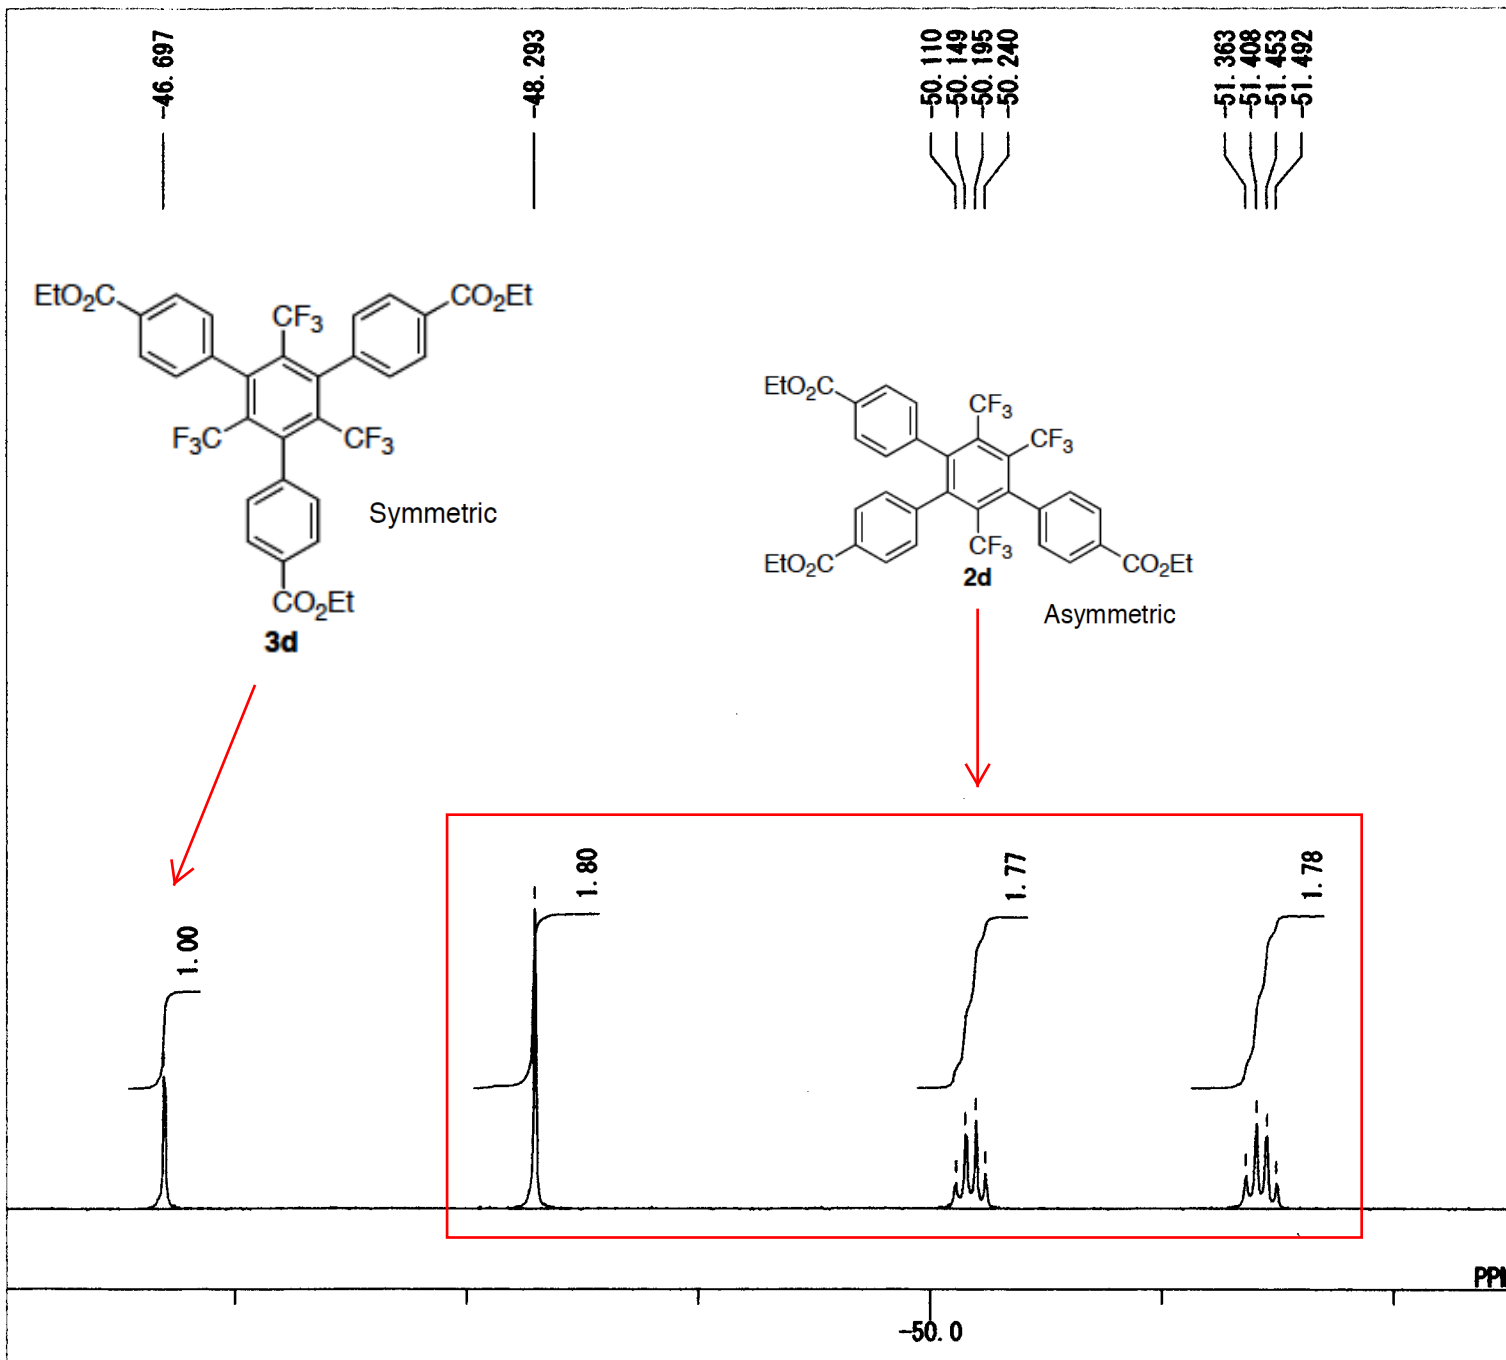

```

MENUF 19F
OBNUC 19F
OFR 376.05 MHz
OBSET 139.60 KHz
OBFIN 36.10 Hz
PW1 6.00 usec
DEADT 10.00 usec
PREDL 0.20000 msec
IWT 1.0000 msec
POINT 32768
SPO 32768
TIMES 16
DUMMY 1
FREQU 80000.00 Hz
FLT 40000 Hz
DELAY 5.00 usec
ACQTM 0.4096 sec
PD 4.9500 sec
ADBIT 16
RGAIN 14
BF 1.00 Hz
T1 0.00
T2 0.00
T3 90.00
T4 100.00
EXMOD NON
EXPCM NON:Single.coupled:PW1_ACQTM
IRNUC 1H
IFR 399.65 MHz
IRSET 124.00 KHz
IRFIN 10500.00 Hz
IRRPW 45 usec
IRATN 511
DFILE 3-置体-Ph-CO2Et(19F).als
SF TH5ATFG2
LKSET 61.60 KHz
LKFIN 79.0 Hz
LKLEV 180
LGA1N 24
LKP1S 219
LKS1G 1150 Hz
CSPED 13 Hz
FILDC
FILDF
  
```

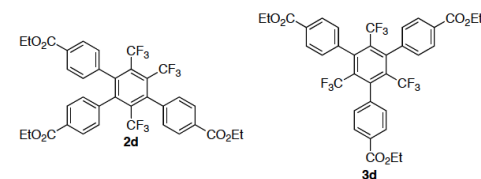

7.495  
7.492  
7.472  
7.419  
7.414  
7.376  
7.372  
7.358  
7.354  
7.260  
7.236  
7.232  
7.215  
7.212  
7.203  
7.199  
7.183  
7.181  
7.164  
7.159  
7.122  
7.118  
7.100  
7.095  
7.081  
7.076  
7.072  
7.065  
7.061  
7.057  
7.054

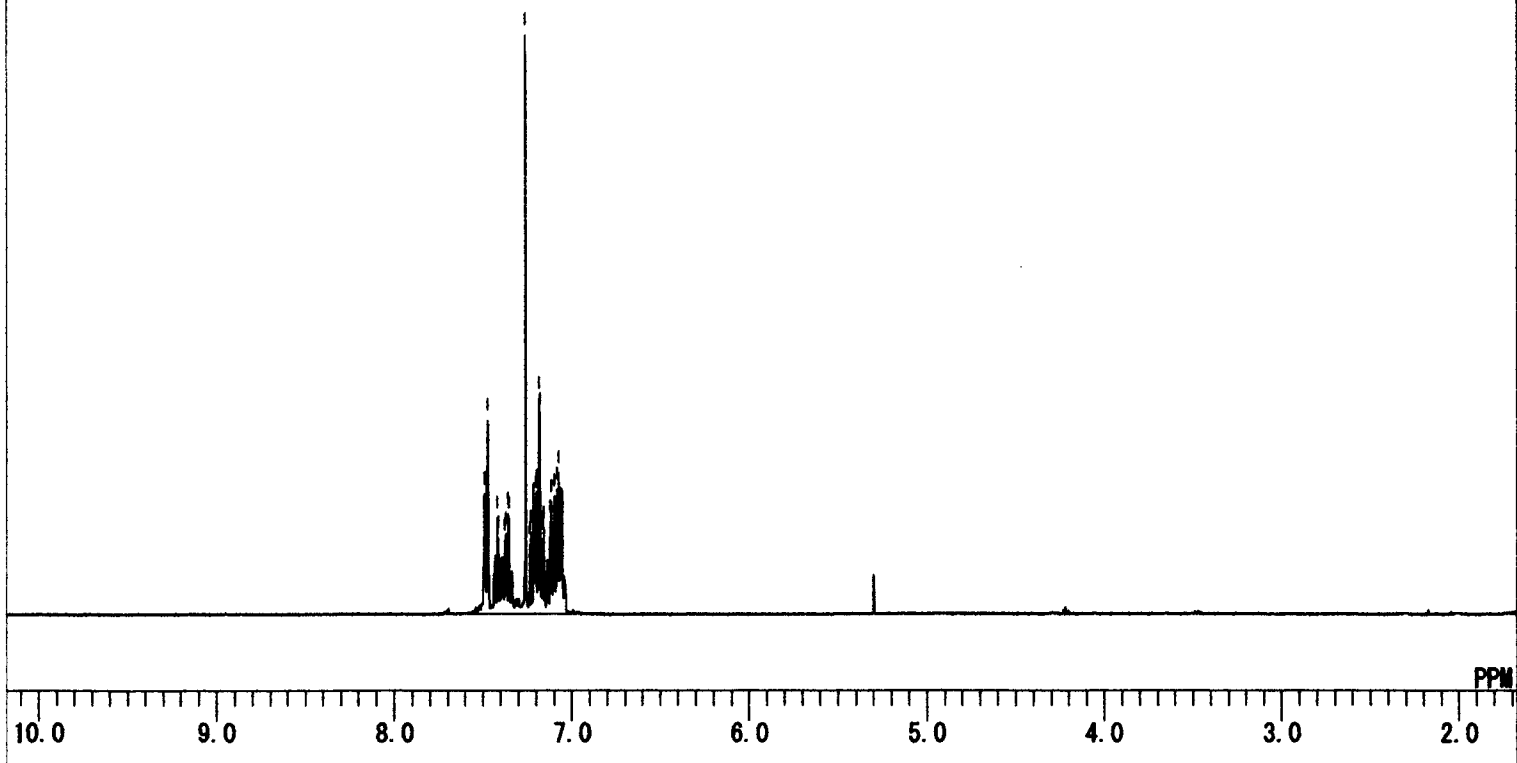

MENUF 1H  
 OBNUC 1H  
 OFR 399.65 MHz  
 OBSSET 135.40 KHz  
 OBF IN 24.90 Hz  
 PW1 5.20 usec  
 DEADT 72.40 usec  
 PREDL 0.20000 msec  
 IWT 1.0000 msec  
 POINT 16384  
 SPO 16384  
 TIMES 8  
 DUMMY 1  
 FREQU 7992.01 Hz  
 FLT 4000 Hz  
 DELAY 50.00 usec  
 ACQTM 2.0501 sec  
 PD 4.9500 sec  
 ADBIT 16  
 RGAIN 17  
 BF 0.00 Hz  
 T1 0.00  
 T2 0.00  
 T3 90.00  
 T4 100.00  
 EXMOD NON  
 EXPCM NON:Single.coupled:PW1\_ACQTM  
 IRNUC 1H  
 IFR 399.65 MHz  
 IRSET 136.90 KHz  
 IRF IN 97.50 Hz  
 IRRPW 45 usec  
 IRATN 511  
 DF FILE 3量体-o-ClPh(1H)-Part2.als  
 SF TH5ATFG2  
 LKSET 61.60 KHz  
 LKF IN 79.0 Hz  
 LKLEV 180  
 LGAIN 22  
 LKPHS 221  
 LKSIG 860  
 CSPED 14 Hz  
 FILDC  
 FILDF

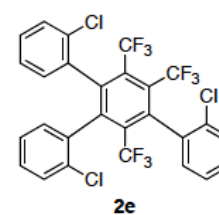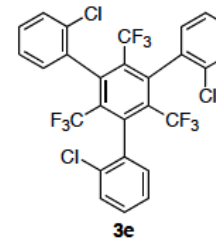

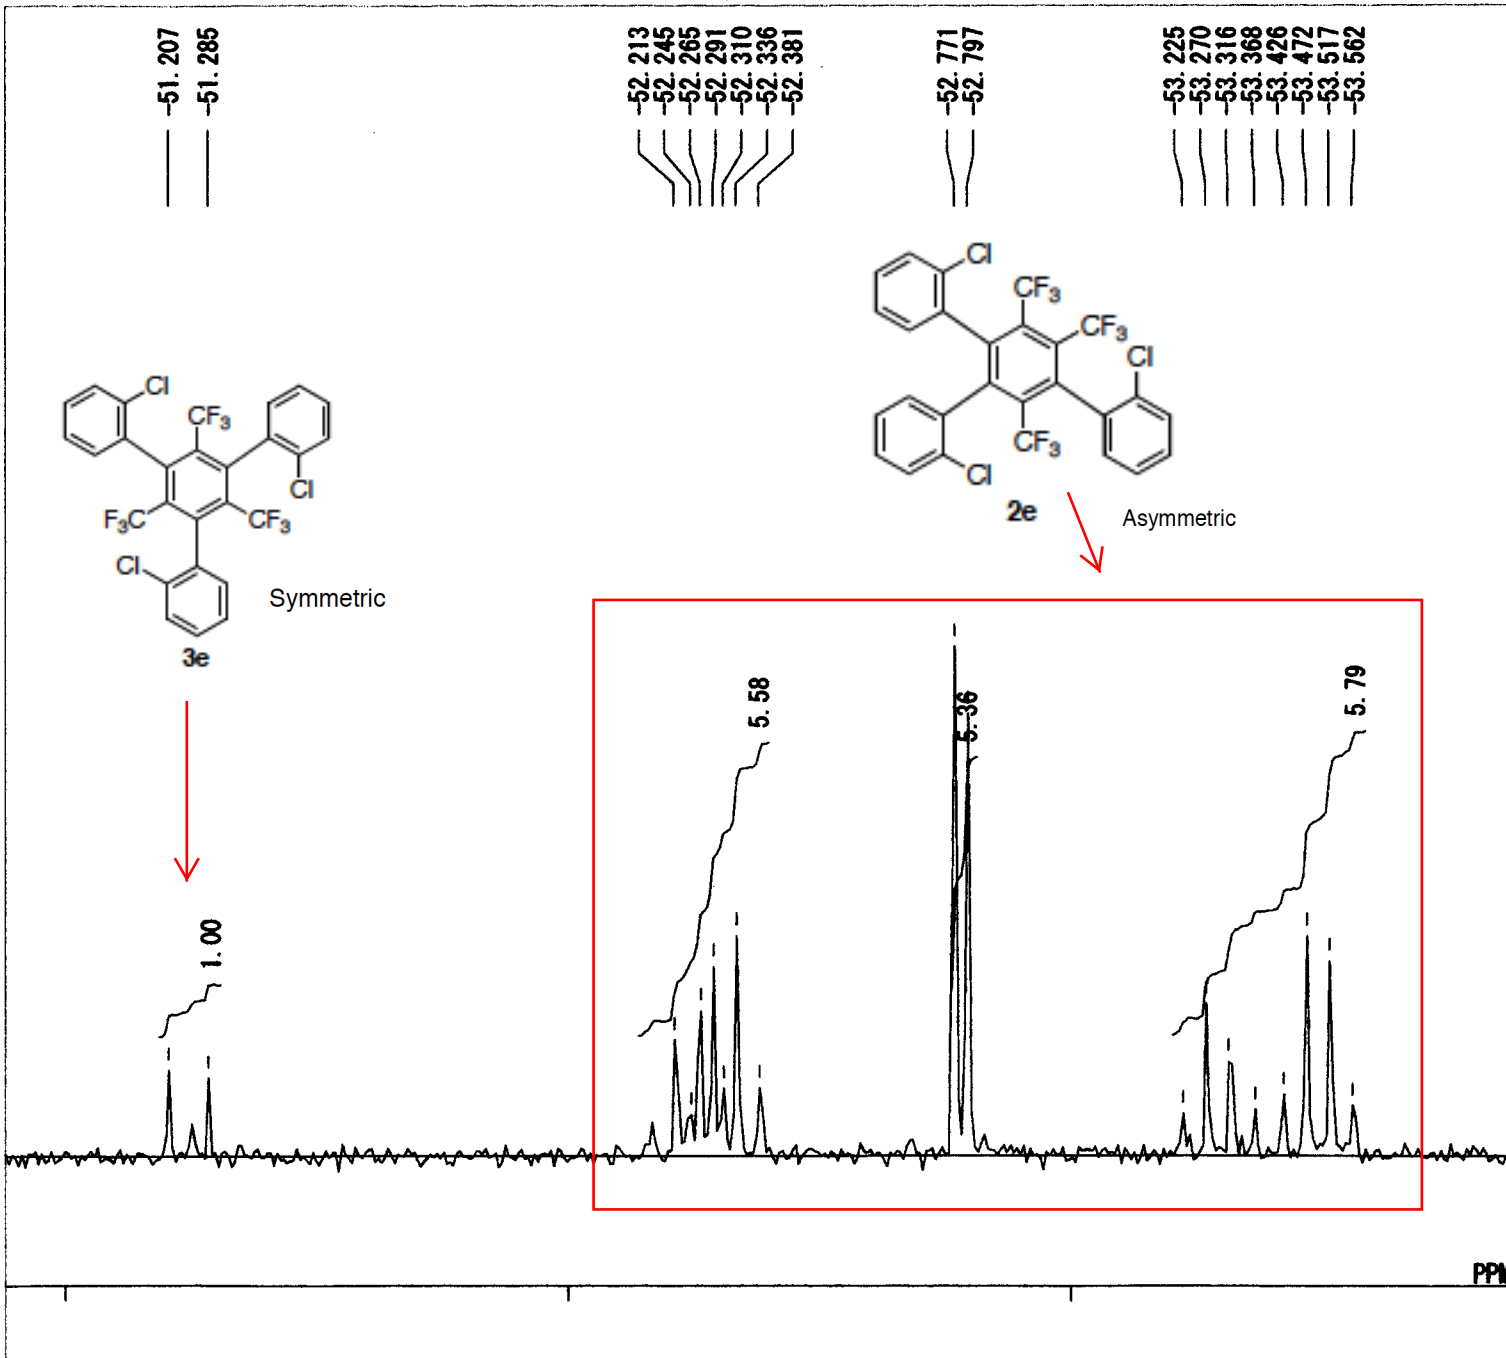

```

MENUF 19F
OBNUC 19F
OFR 376.05 MHz
OBSET 139.60 KHz
OBFIN 36.10 Hz
PW1 6.00 usec
DEADT 10.00 usec
PREDL 0.20000 msec
IWT 1.0000 msec
POINT 32768
SPO 32768
TIMES 16
DUMMY 1
FREQU 80000.00 Hz
FLT 40000 Hz
DELAY 5.00 usec
ACQTM 0.4096 sec
PD 4.9500 sec
ADBIT 16
RGAIN 14
BF 0.10 Hz
T1 0.00
T2 0.00
T3 90.00
T4 100.00
EXMOD NON
EXPCM NON:Single.coupled:PW1_ACQTM.
IRNUC 1H
IFR 399.65 MHz
IRSET 124.00 KHz
IRFIN 10500.00 Hz
IRRPW 45 usec
IRATN 511
DFILE 3重体-o-ClPh(19F)-Part1.als
SF TH5ATFG2
LKSET 61.60 KHz
LKFIN 79.0 Hz
LKLEV 180
LGAIN 21
LKPHS 221
LKSIG 715
CSPED 11 Hz
FILDC
FILDF
  
```

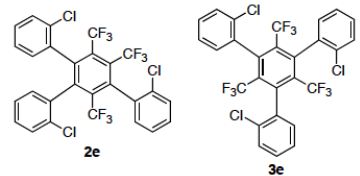

7.492  
7.472  
7.469  
7.426  
7.414  
7.409  
7.391  
7.386  
7.371  
7.367  
7.352  
7.332  
7.317  
7.314  
7.260  
7.183  
7.181  
7.175  
7.171  
7.153  
7.123  
7.118  
7.115  
7.109  
7.089  
7.084  
7.077  
7.070  
7.066  
7.059  
7.054  
7.037

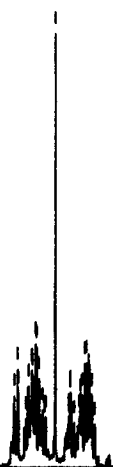

MENUF 1H  
OBNUC 1H  
OFR 399.65 MHz  
OBSET 135.40 KHz  
OBFIN 24.90 Hz  
PW1 5.20 usec  
DEADT 72.40 usec  
PREDL 0.20000 msec  
IWT 1.0000 msec  
POINT 16384  
SPO 16384  
TIMES 8  
DUMMY 1  
FREQU 7992.01 Hz  
FLT 4000 Hz  
DELAY 50.00 usec  
ACQTM 2.0501 sec  
PD 4.9500 sec  
ADBIT 16  
RGAIN 18  
BF 0.00 Hz  
T1 0.00  
T2 0.00  
T3 90.00  
T4 100.00  
EXMOD NON  
EXPCM NON:Single.coupled:PW1\_ACQTM  
IRNUC 1H  
IFR 399.65 MHz  
IRSET 136.90 KHz  
IRFIN 97.50 Hz  
IRRPW 45 usec  
IRATN 511  
DFILE 3量体-o-CIPh(1H)-Part1.als  
SF TH5ATFG2  
LKSET 61.60 KHz  
LKFIN 79.0 Hz  
LKLEV 180  
LGAIN 21  
LKPHS 221  
LKSIG 666  
CSPED 14 Hz  
FILDC  
FILDF

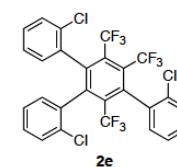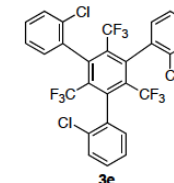

-52.206  
-52.258  
-52.304  
-52.349

-52.673

-52.972  
-53.017  
-53.063  
-53.108

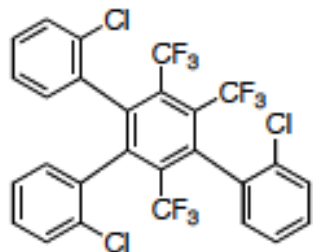

2e Asymmetric

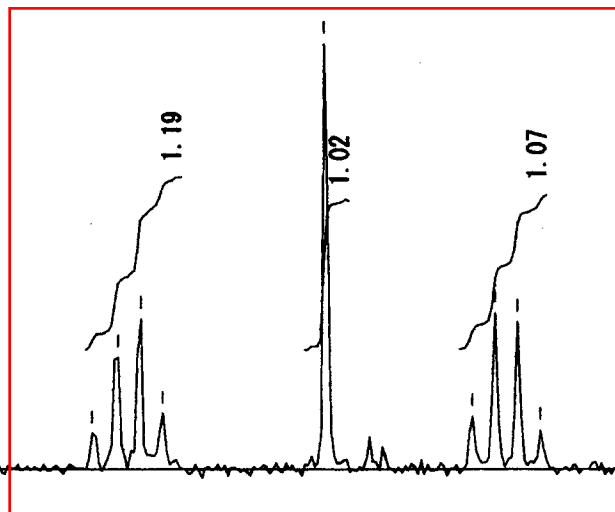

PPM

```

MENUF 19F
OBNUC 19F
OFR      376.05 MHz
OBSET    139.60 KHz
OBFIN    36.10 Hz
PW1       6.00 usec
DEADT    10.00 usec
PREDL    0.20000 msec
IWT      1.0000 msec
POINT    32768
SPO      32768
TIMES    16
DUMMY    1
FREQU    80000.00 Hz
FLT      40000 Hz
DELAY    5.00 usec
ACQTM    0.4096 sec
PD       4.9500 sec
ADBIT    16
RGAIN    14
BF       0.10 Hz
T1       0.00
T2       0.00
T3       90.00
T4       100.00
EXMOD    NON
EXPCM    NON:Single.coupled:PW1_ACQTM
IRNUC    1H
IFR      399.65 MHz
IRSET    124.00 KHz
IRFIN    10500.00 Hz
IRRPW    45 usec
IRATN    511
DFILE    3量体-o-CIPh(19F)-Part2.als
SF       TH5ATFG2
LKSET    61.60 KHz
LKFIN    79.0 Hz
LKLEV    180
LGAIN    23
LKPHS    221
LKSIG    1050
CSPED    10 Hz
FILDC
FILDF
  
```

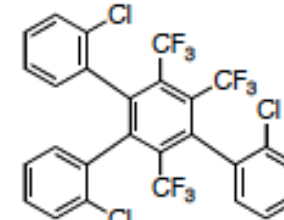

2e

7.471  
7.450  
7.422  
7.402  
7.388  
7.383  
7.362  
7.354  
7.349  
7.341  
7.334  
7.330  
7.315  
7.282  
7.260  
7.204  
7.179  
7.172  
7.154  
7.148  
7.140  
7.134  
7.129  
7.092  
7.075  
7.072  
7.060  
7.040  
6.988  
6.944  
6.922  
6.902  
6.889  
6.881  
6.866  
6.846  
6.822  
6.802

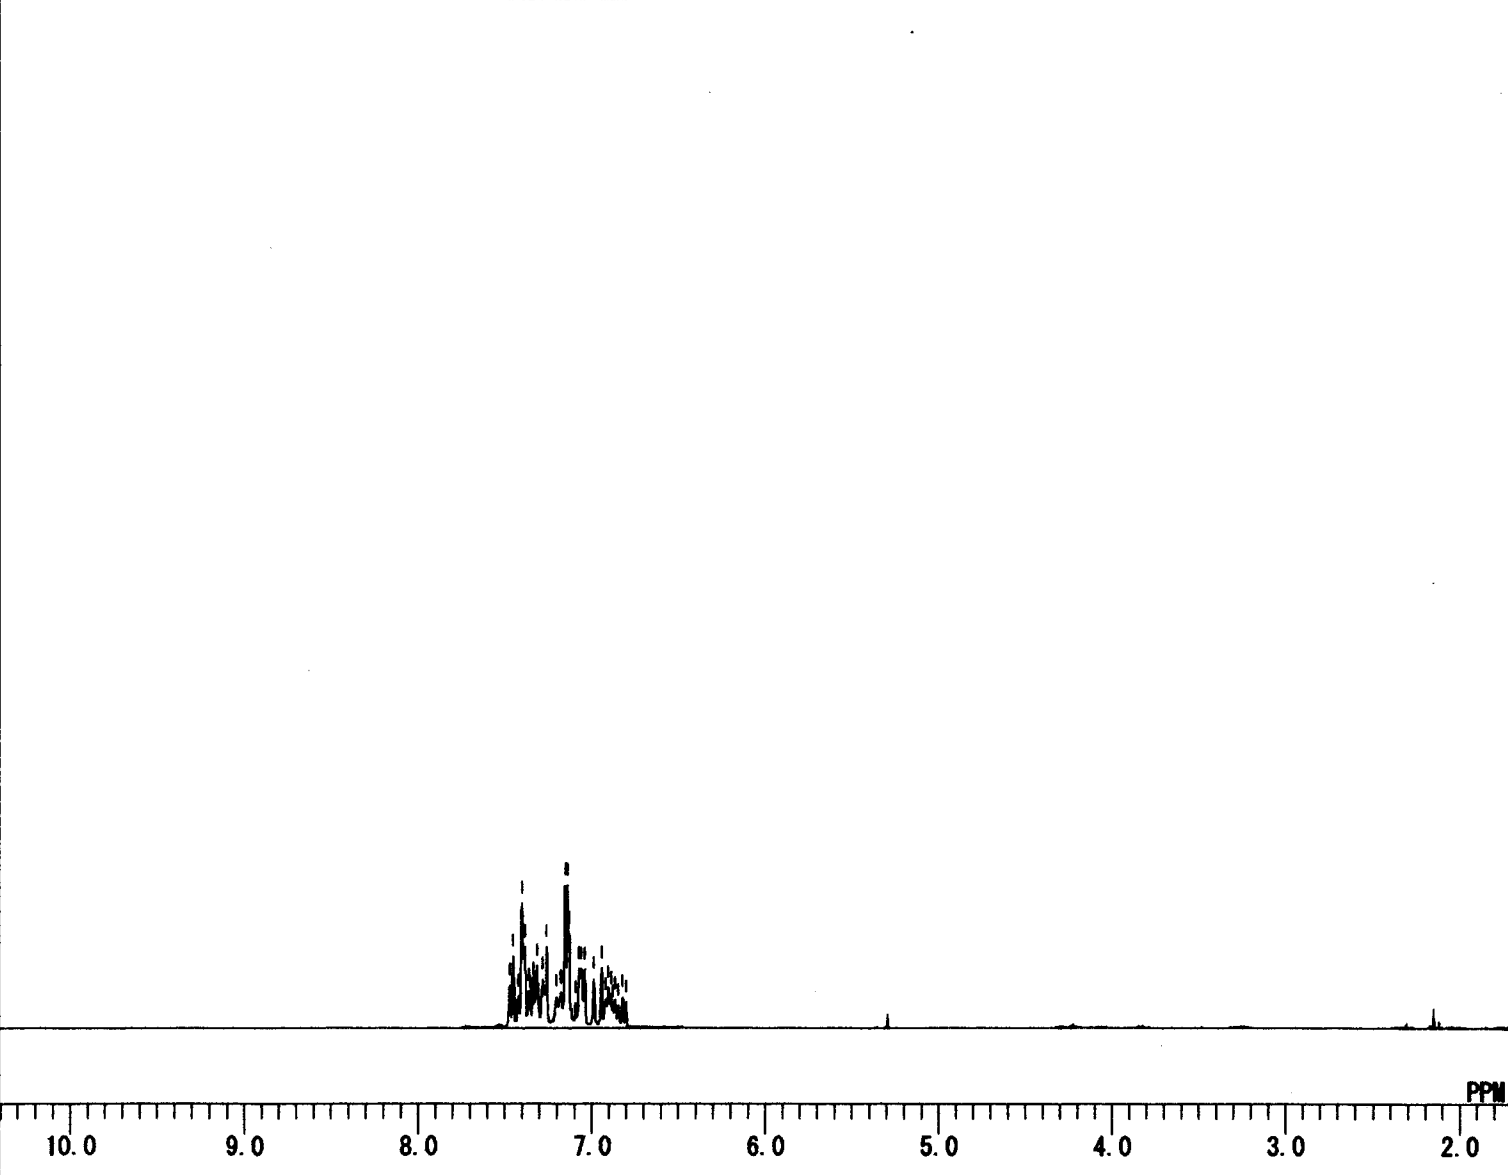

MENUF 1H  
OBNUC 1H  
OFR 399.65 MHz  
OBSET 135.40 KHz  
OBFIN 24.90 Hz  
PW1 5.20 usec  
DEADT 72.40 usec  
PREDL 0.20000 msec  
IWT 1.0000 msec  
POINT 16384  
SPO 16384  
TIMES 8  
DUMMY 1  
FREQU 7992.01 Hz  
FLT 4000 Hz  
DELAY 50.00 usec  
ACQTM 2.0501 sec  
PD 4.9500 sec  
ADBIT 16  
RGAIN 14  
BF 0.10 Hz  
T1 0.00  
T2 0.00  
T3 90.00  
T4 100.00  
EXMOD NON  
EXPCM NON:Single.coupled:PW1\_ACQTM  
IRNUC 1H  
IFR 399.65 MHz  
IRSET 136.90 KHz  
IRFIN 97.50 Hz  
IRRPW 45 usec  
IRATN 511  
DFILE 3重体-m-ClPh(1H).als  
SF TH5ATFG2  
LKSET 61.60 KHz  
LKFIN 79.0 Hz  
LKLEV 180  
LGAIN 22  
LKPHS 221  
LKSIG 727  
CSPED 12 Hz  
FILDC  
FILDF

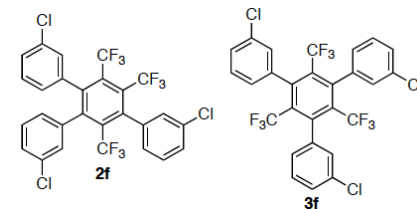

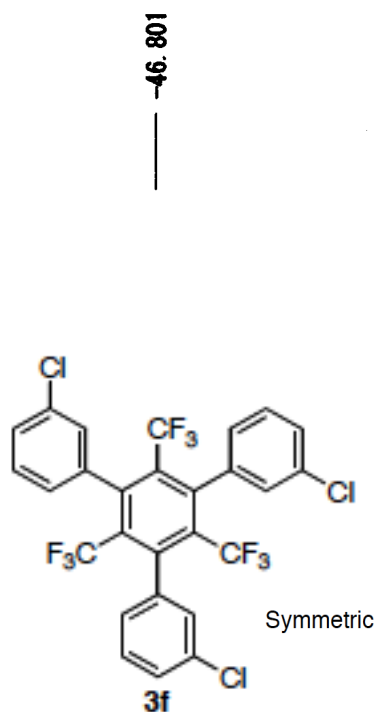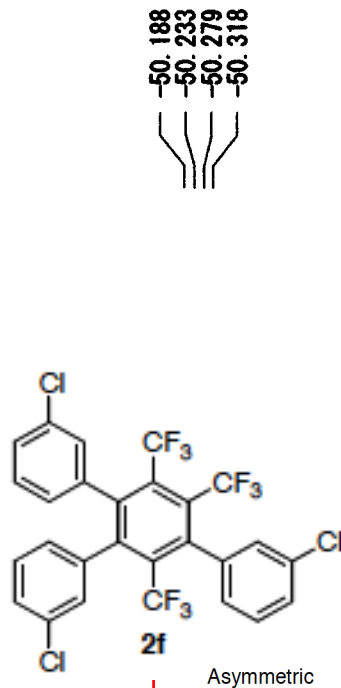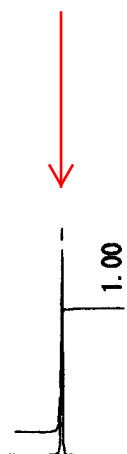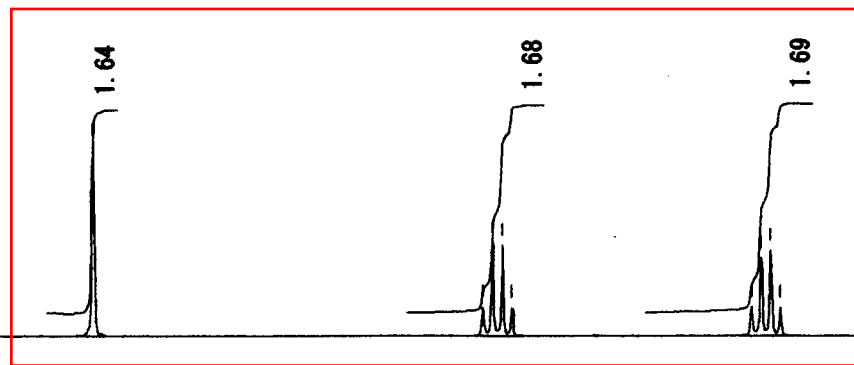

```

MENUF 19F
OBNUC 19F
OFR      376.05 MHz
OBSET    139.60 KHz
OBFIN    36.10 Hz
PW1      6.00 usec
DEADT    10.00 usec
PREDL    0.20000 msec
IWT      1.0000 msec
POINT    32768
SPO      32768
TIMES    16
DUMMY    1
FREQU    80000.00 Hz
FLT      40000 Hz
DELAY    5.00 usec
ACQTM    0.4096 sec
PD        4.9500 sec
ADBIT    16
RGAIN    14
BF        0.10 Hz
T1        0.00
T2        0.00
T3        90.00
T4        100.00
EXMOD    NON
EXPCM    NON:Single.coupled:PW1_ACQTM
IRNUC    1H
IFR      399.65 MHz
IRSET    124.00 KHz
IRFIN    10500.00 Hz
IRRPW    45 usec
IRATN    511
DFILE    3量体-m-ClPh(19F).als
SF        TH5ATFG2
LKSET    61.60 KHz
LKFIN    79.0 Hz
LKLEV    180
LGAIN    22
LKPHS    221
LKSIG    753
CSPED    11 Hz
FILDG
FILDF
  
```

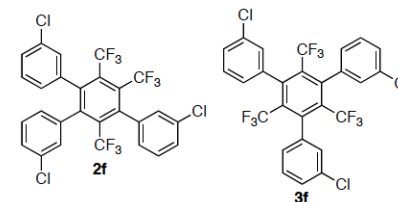

PPM

-50.0

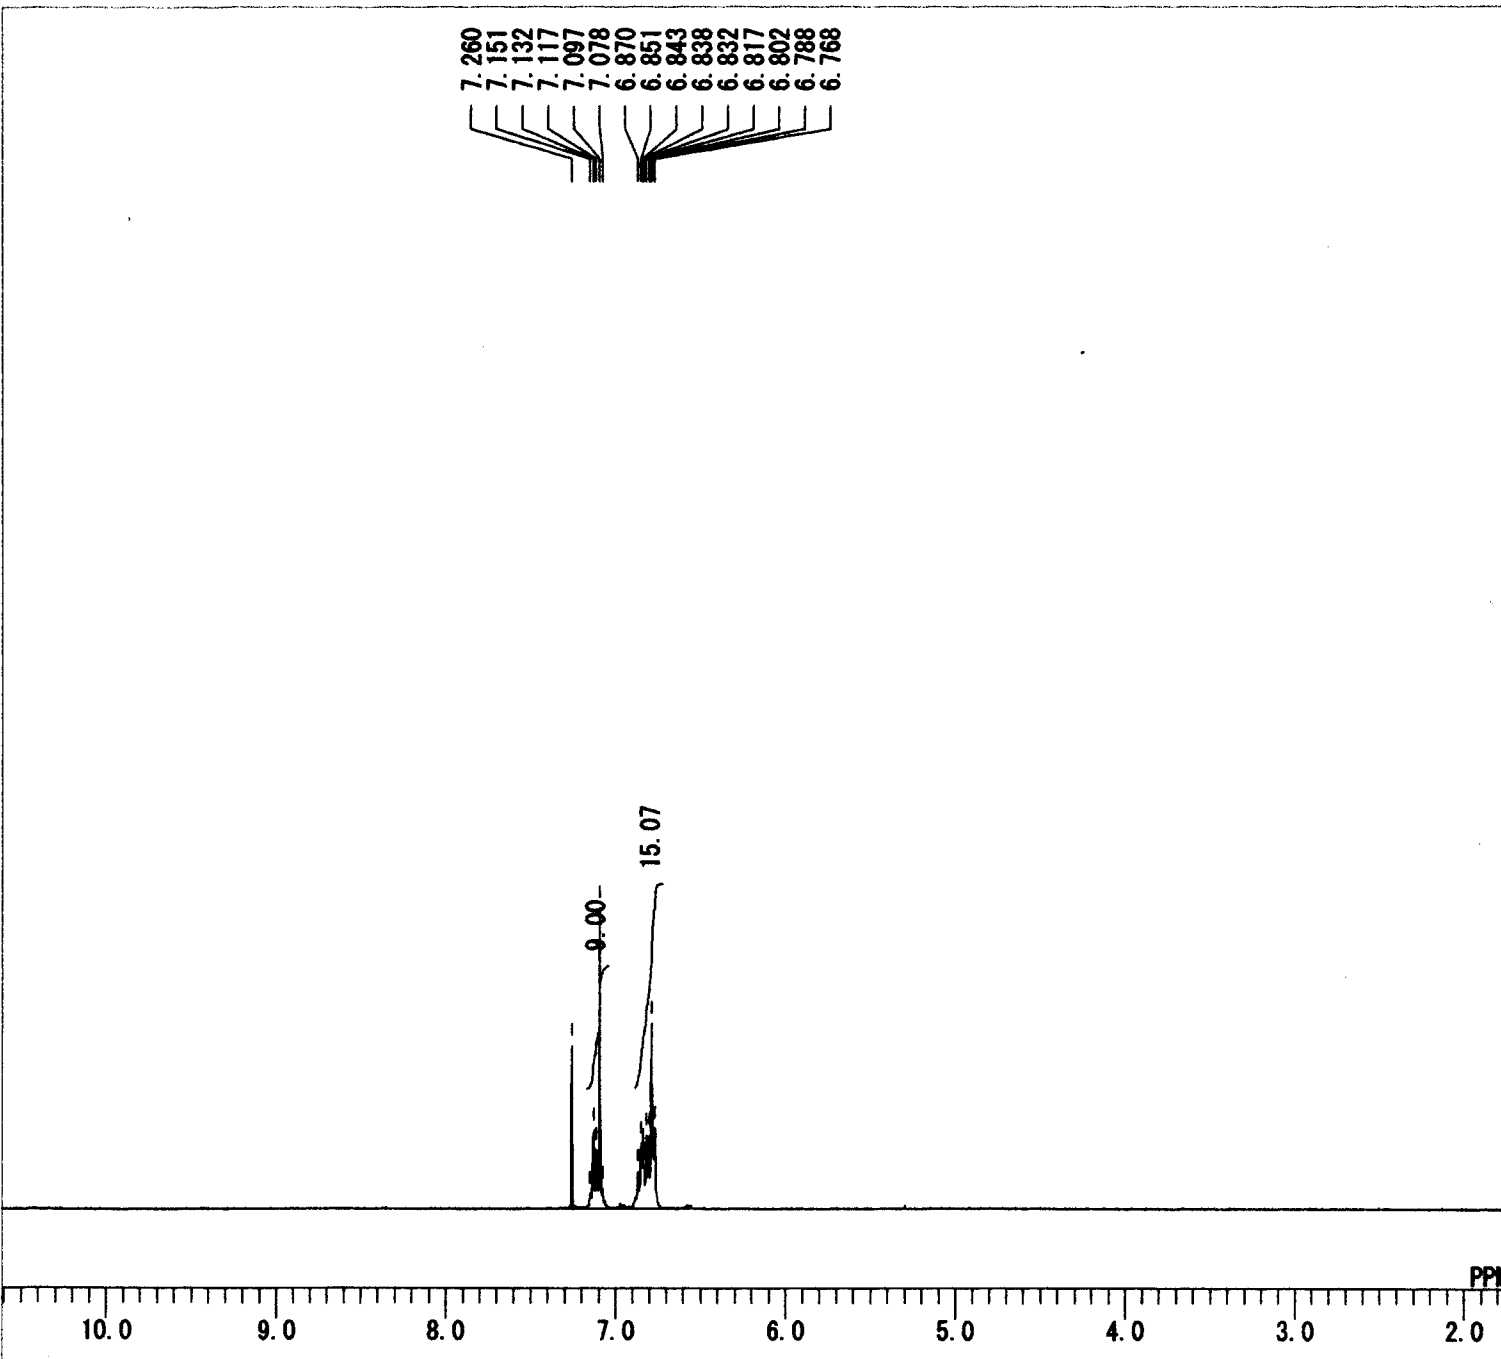

```

MENUF 1H
OBNUC 1H
OFR 399.65 MHz
OBSET 135.40 KHz
OBFIN 24.90 Hz
PW1 5.20 usec
DEADT 72.40 usec
PREDL 0.20000 msec
IWT 1.0000 msec
POINT 16384
SPO 16384
TIMES 8
DUMMY 1
FREQU 7992.01 Hz
FLT 4000 Hz
DELAY 50.00 usec
ACQTM 2.0501 sec
PD 4.9500 sec
ADBIT 16
RGAIN 19
BF 0.00 Hz
T1 0.00
T2 0.00
T3 90.00
T4 100.00
EXMOD NON
EXPCM NON:Single.coupled:PW1_ACQTM
IRNUC 1H
IFR 399.65 MHz
IRSET 136.90 KHz
IRFIN 97.50 Hz
IRRPW 45 usec
IRATN 511
DFILE CF3-PhCl+2diphenylacetylene(
SF TH5ATFG2
LKSET 61.60 KHz
LKFIN 79.0 Hz
LKLEV 180
LGAIN 23
LKPHS 221
LKSIG 949
CSPED 13 Hz
FILDC
FILDF

```

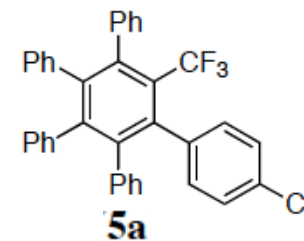



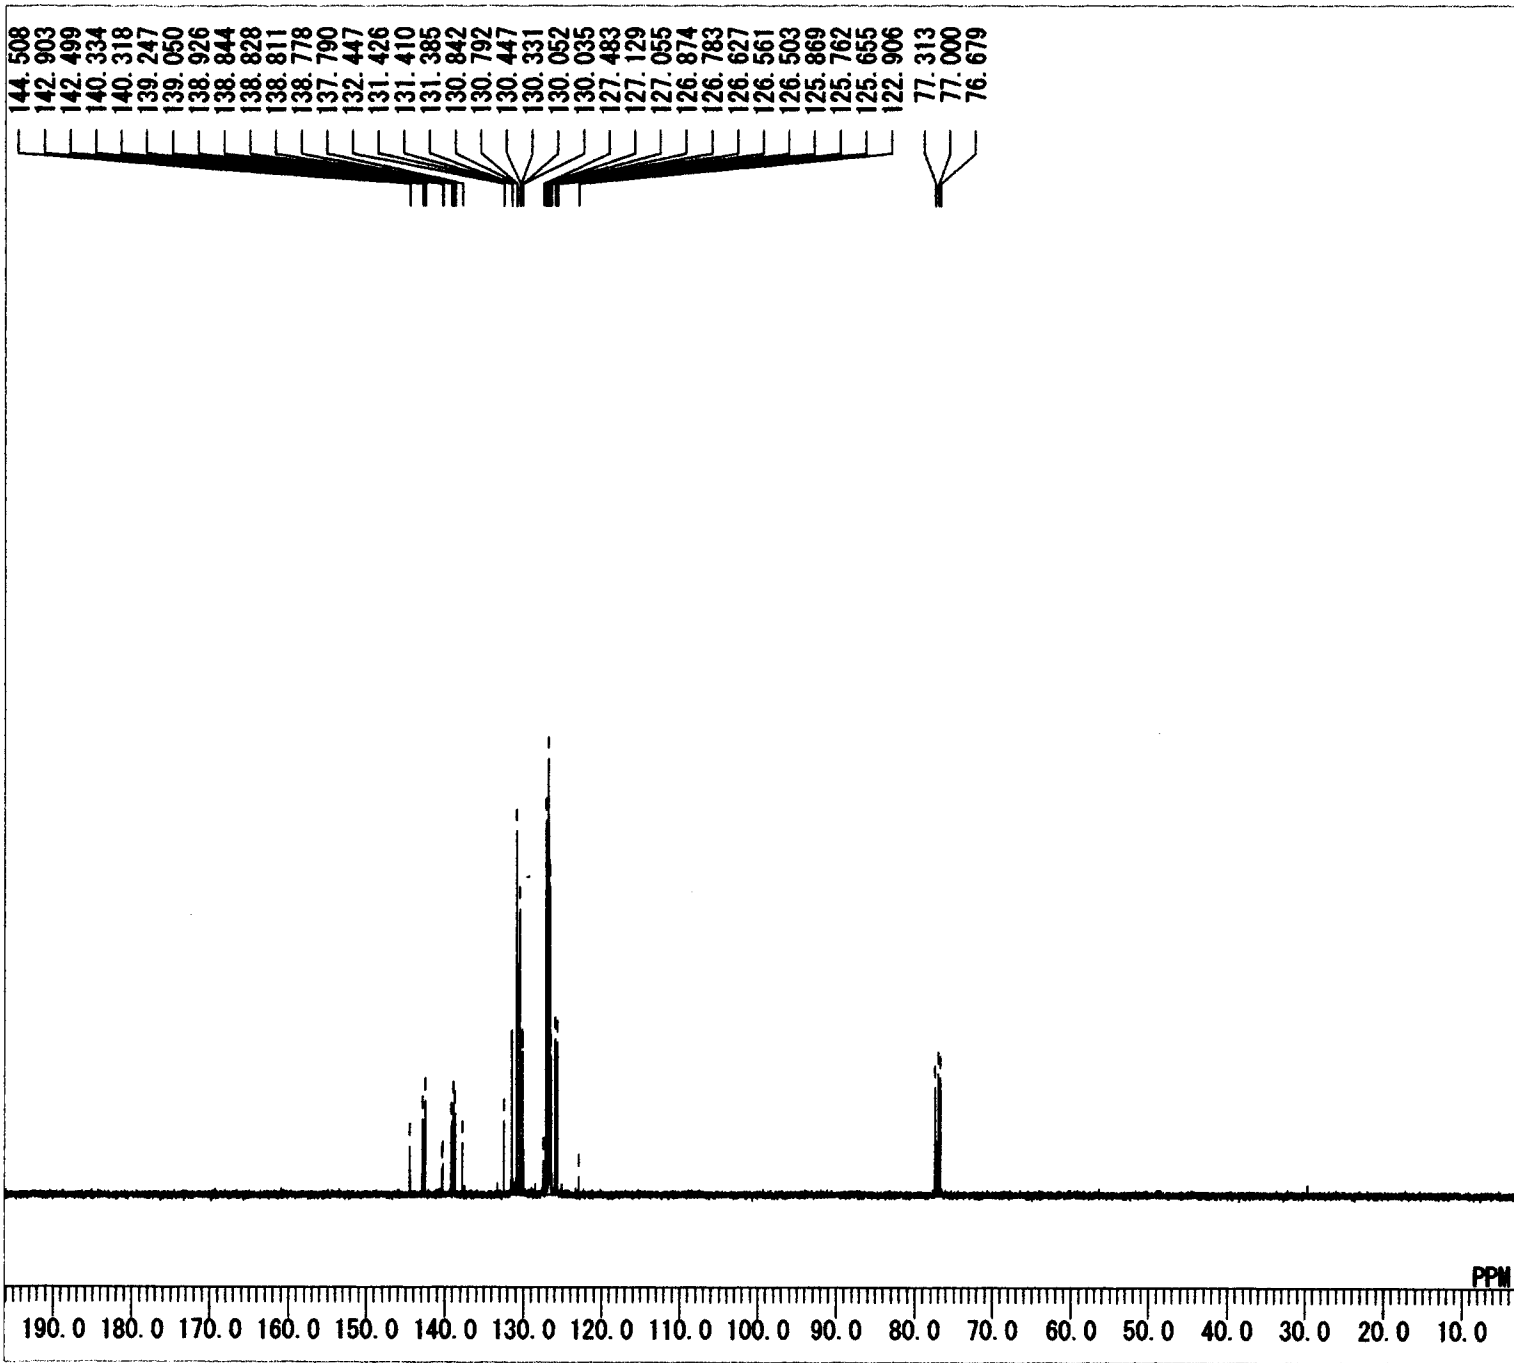

```

MENUF 13C
OBNUC 13C
OFR 100.40 MHz
OBSET 125.00 KHz
OBFIN 10500.00 Hz
PW1 6.00 usec
DEADT 19.10 usec
PREDL 0.20000 msec
IWT 1.0000 msec
POINT 32768
SPO 32768
TIMES 256
DUMMY 1
FREQU 27118.64 Hz
FLT 13550 Hz
DELAY 14.80 usec
ACQTM 1.2083 sec
PD 1.7920 sec
ADBIT 16
RGAIN 24
BF 0.10 Hz
T1 0.00
T2 0.00
T3 90.00
T4 100.00
EXMOD BCM
EXPCM Bilevel. complete. decoupling:
IRNUC 1H
IFR 399.65 MHz
IRSET 124.00 KHz
IRFIN 10500.00 Hz
IRRPW 45 usec
IRATN 511
DFILE CF3-PhCl+2diphenylacetylene (
SF TH5ATFG2
LKSET 61.60 KHz
LKFIN 79.0 Hz
LKLEV 180
LGAIN 24
LKPHS 221
LKSIG 894
CSPED 14 Hz
FILDC
FILDF

```

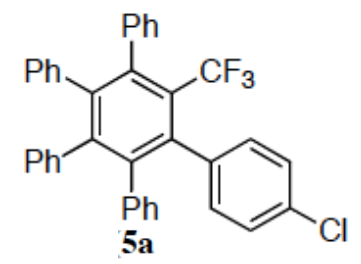

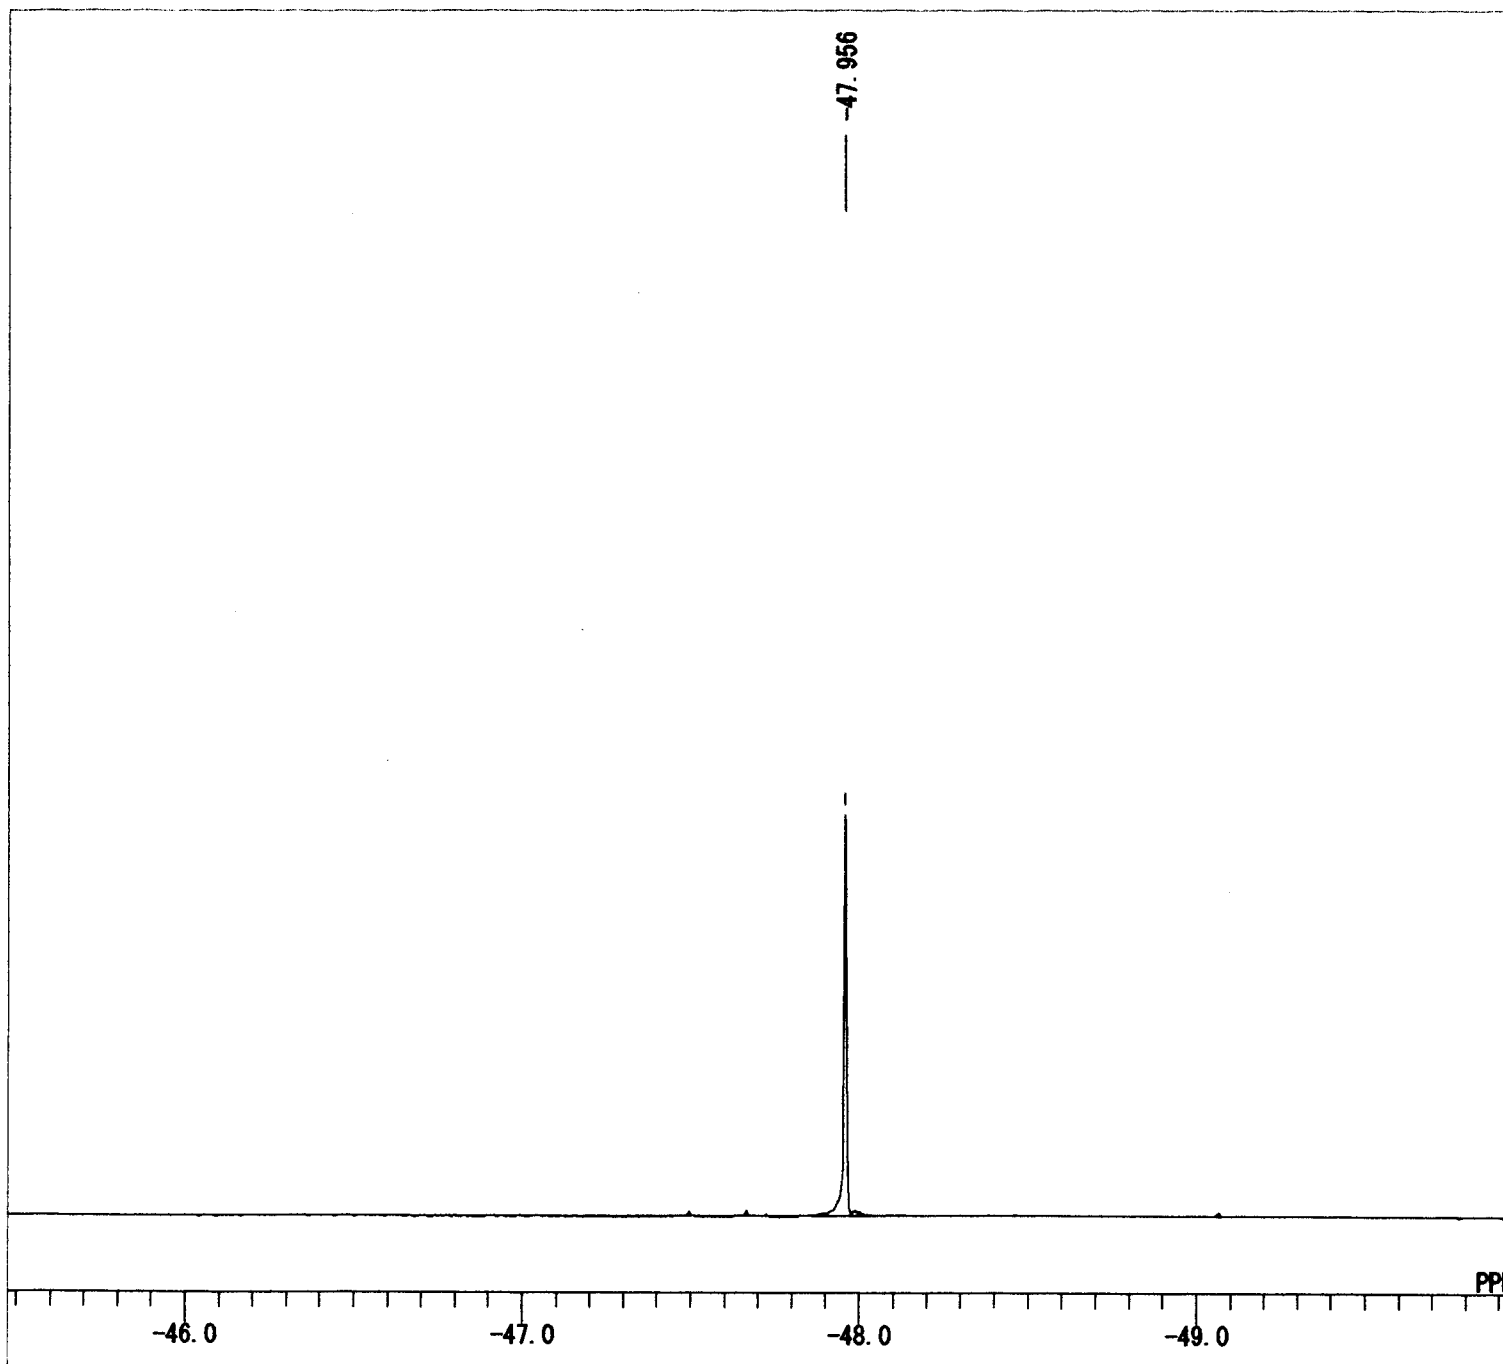

MENUF 19F  
 OBNUC 19F  
 OFR 376.05 MHz  
 OBSET 139.60 KHz  
 OBFIN 36.10 Hz  
 PW1 6.00 usec  
 DEADT 10.00 usec  
 PREDL 0.20000 msec  
 IWT 1.0000 msec  
 POINT 32768  
 SPO 32768  
 TIMES 16  
 DUMMY 1  
 FREQU 80000.00 Hz  
 FLT 40000 Hz  
 DELAY 5.00 usec  
 ACQTM 0.4096 sec  
 PD 4.9500 sec  
 ADBIT 16  
 RGAIN 14  
 BF 0.00 Hz  
 T1 0.00  
 T2 0.00  
 T3 90.00  
 T4 100.00  
 EXMOD NON  
 EXPCM NON:Single.coupled:PW1\_ACQTM.  
 IRNUC 1H  
 IFR 399.65 MHz  
 IRSET 124.00 KHz  
 IRFIN 10500.00 Hz  
 IRRPW 45 usec  
 IRATN 511  
 DFILE CF3-PhCl+2diphenylacetylene ( TH5ATFG2  
 SF TH5ATFG2  
 LKSET 61.60 KHz  
 LKFIN 79.0 Hz  
 LKLEV 180  
 LGAIN 25  
 LKPHS 221  
 LKSIG 1136  
 GSPED 14 Hz  
 FILDC  
 FILDF

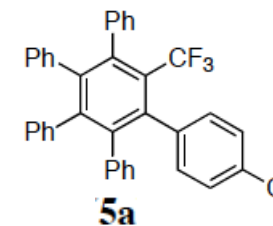

# <sup>19</sup>F NMR Analysis of the reaction mixture (Total yield for all CF<sub>3</sub>-containing compounds : 100% yield)

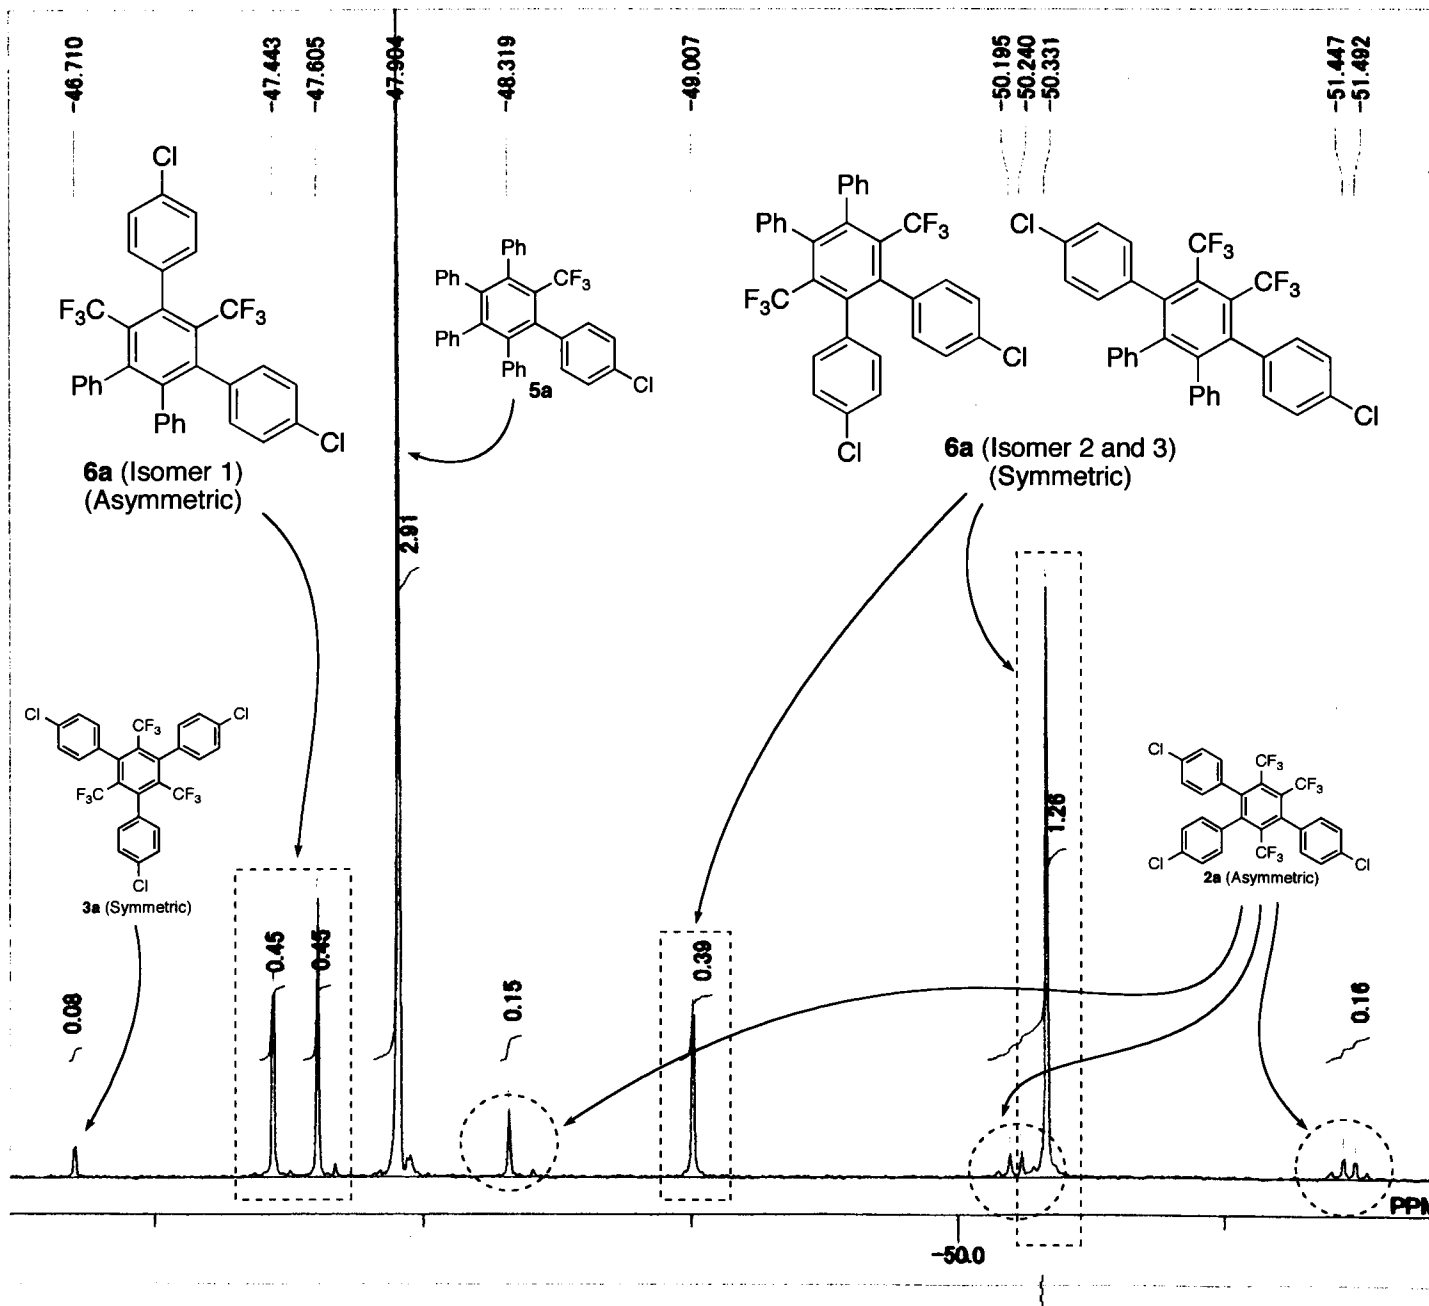

|       |                                  |
|-------|----------------------------------|
| MENU  | 19F                              |
| OBNUC | 19F                              |
| OFR   | 376.05 MHz                       |
| OBSET | 139.80 KHz                       |
| OBFIN | 38.10 Hz                         |
| PW1   | 6.00 usec                        |
| DEADT | 10.00 usec                       |
| PREDL | 0.20000 msec                     |
| IWT   | 1.0000 msec                      |
| POINT | 32768                            |
| SPO   | 32768                            |
| TIMES | 16                               |
| DUMMY | 1                                |
| FREQU | 80000.00 Hz                      |
| FLT   | 40000 Hz                         |
| DELAY | 5.00 usec                        |
| ACQTM | 0.4096 sec                       |
| PD    | 4.9500 sec                       |
| ADBIT | 16                               |
| RGAIN | 14                               |
| BF    | 0.60 Hz                          |
| T1    | 0.00                             |
| T2    | 0.00                             |
| T3    | 90.00                            |
| T4    | 100.00                           |
| EXMOD | NON                              |
| EXPCM | NON:Single.coupled:PW1_ACQTM_PD: |
| IRNUC | 1H                               |
| IFR   | 399.65 MHz                       |
| IRSET | 124.00 KHz                       |
| IRFIN | 10500.00 Hz                      |
| IRFPW | 45 usec                          |
| IRATN | 511                              |
| DFILE | DEFAULT.ALS                      |
| SF    | TH5ATFG2                         |
| LKSET | 61.90 KHz                        |
| LKFIN | 79.0 Hz                          |
| LKLEV | 180                              |
| LGAIN | 23                               |
| LKPHS | 222                              |
| LKSIG | 827                              |
| CSPED | 14 Hz                            |
| FILDC |                                  |
| FILDF |                                  |

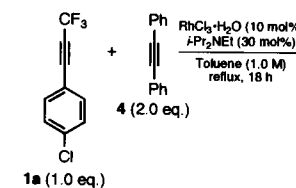

# After *one* silica gel column chromatography

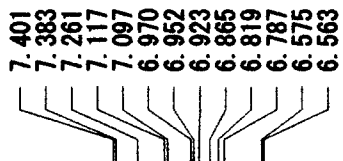

5.300

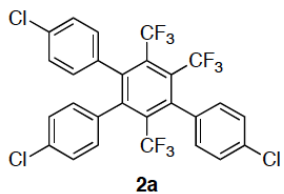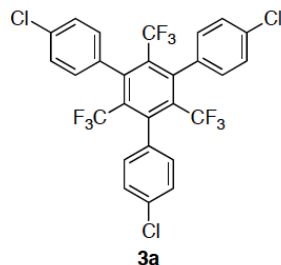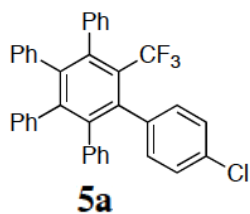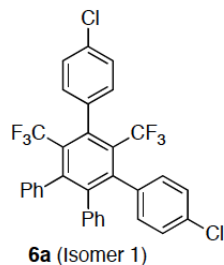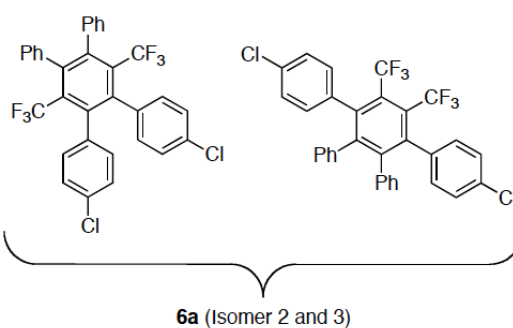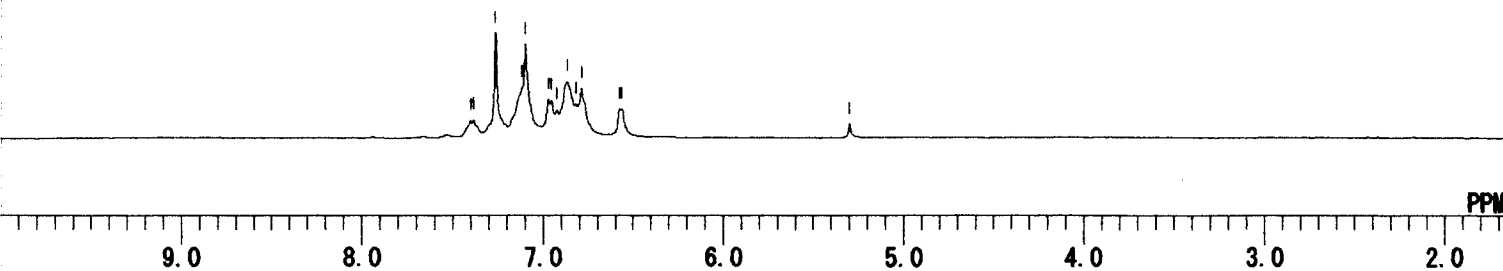

|       |                                |
|-------|--------------------------------|
| MENUF | 1H                             |
| OBNUC | 1H                             |
| OFR   | 399.65 MHz                     |
| OBSET | 135.40 KHz                     |
| OBFIN | 24.90 Hz                       |
| PW1   | 5.80 usec                      |
| DEADT | 72.10 usec                     |
| PREDL | 0.20000 msec                   |
| IWT   | 1.0000 msec                    |
| POINT | 16384                          |
| SPO   | 16384                          |
| TIMES | 64                             |
| DUMMY | 1                              |
| FREQU | 7992.01 Hz                     |
| FLT   | 4000 Hz                        |
| DELAY | 50.00 usec                     |
| ACQTM | 2.0501 sec                     |
| PD    | 4.9500 sec                     |
| ADBIT | 16                             |
| RGAIN | 20                             |
| BF    | 5.00 Hz                        |
| T1    | 0.00                           |
| T2    | 0.00                           |
| T3    | 90.00                          |
| T4    | 100.00                         |
| EXMOD | NON                            |
| EXPCM | NON: Single. coupled:PW1_ACQTM |
| IRNUC | 1H                             |
| IFR   | 399.65 MHz                     |
| IRSET | 136.90 KHz                     |
| IRFIN | 97.50 Hz                       |
| IRRPW | 45 usec                        |
| IRATN | 511                            |
| DFILE | bypro-p-Cl-diPh(1H).als        |
| SF    | TH5ATFG2                       |
| LKSET | 61.60 KHz                      |
| LKFIN | 79.0 Hz                        |
| LKLEV | 180                            |
| LGAIN | 25                             |
| LKPHS | 250                            |
| LKSIG | 1831                           |
| CSPED | 14 Hz                          |
| FILDC |                                |
| FILDF |                                |

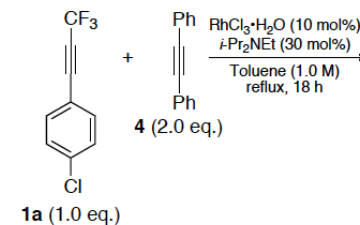

# After one silica gel column chromatography

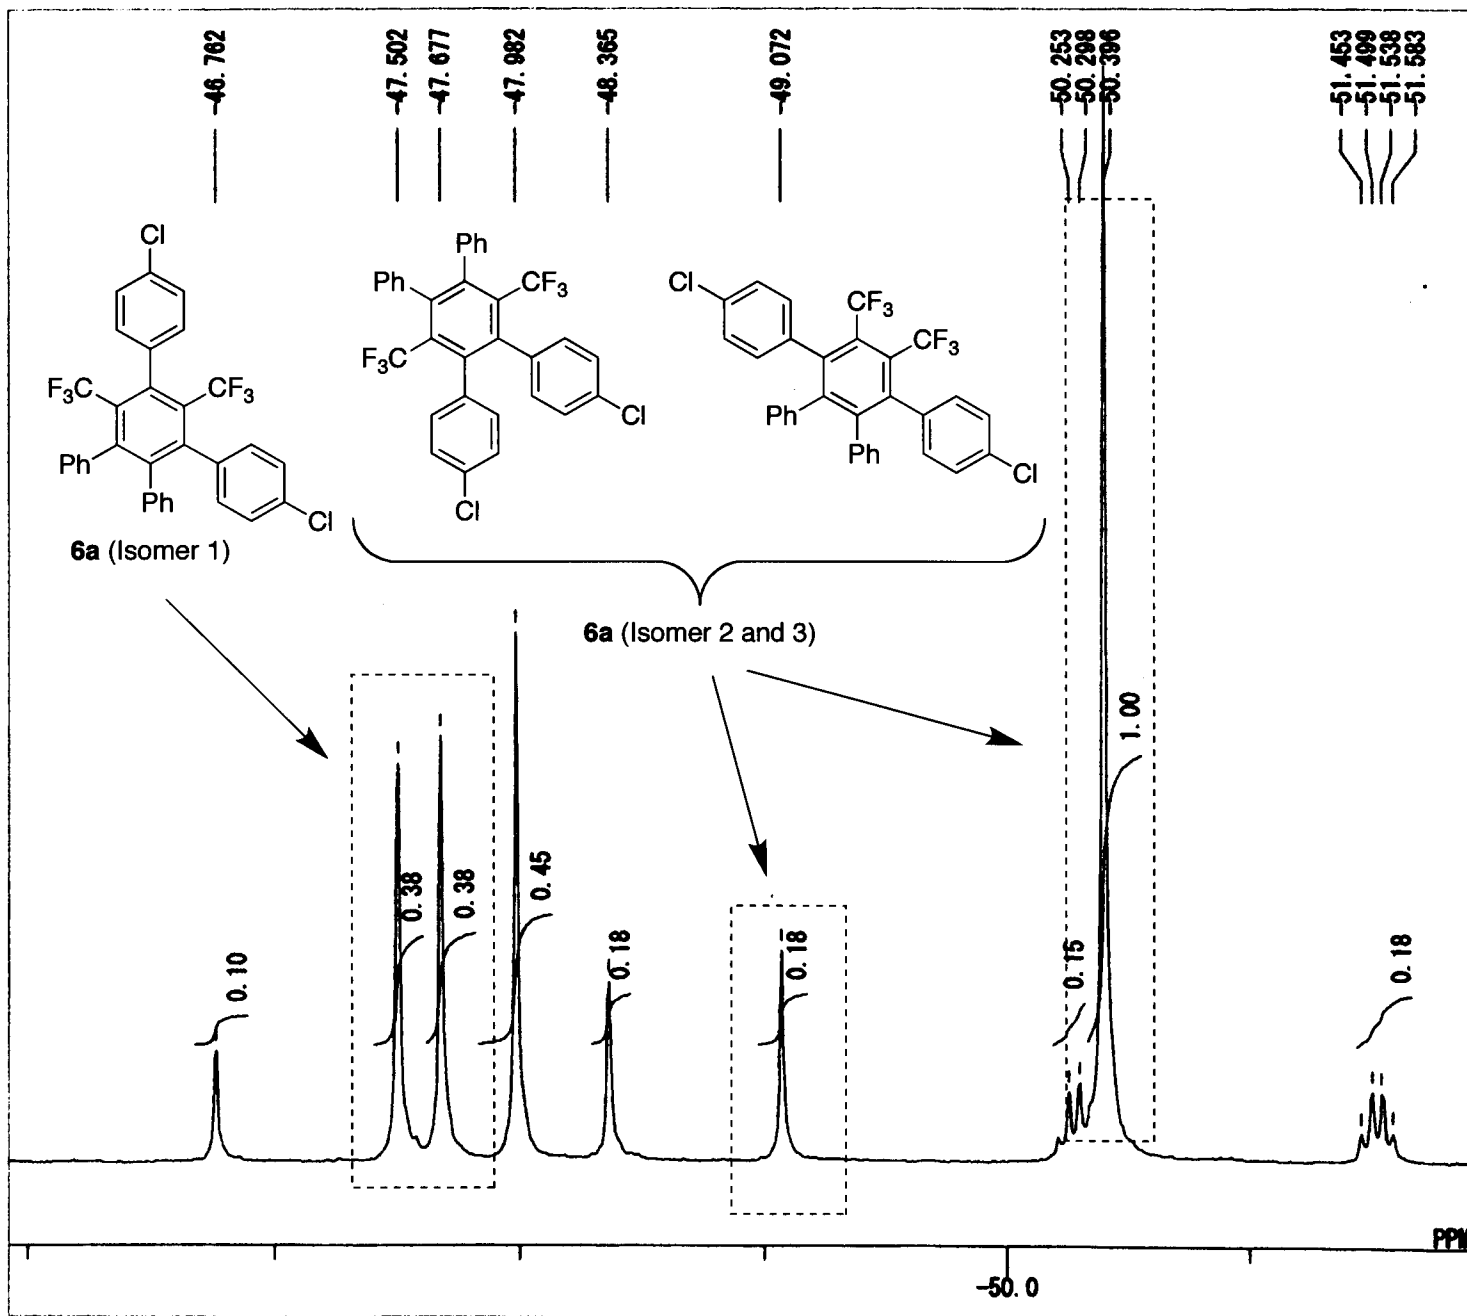

|       |                              |
|-------|------------------------------|
| MENUF | 19F                          |
| OBNUC | 19F                          |
| OFR   | 376.05 MHz                   |
| OBSET | 139.60 KHz                   |
| OBFIN | 36.10 Hz                     |
| PW1   | 6.00 usec                    |
| DEADT | 10.00 usec                   |
| PREDL | 0.20000 msec                 |
| IWT   | 1.0000 msec                  |
| POINT | 32768                        |
| SPO   | 32768                        |
| TIMES | 128                          |
| DUMMY | 1                            |
| FREQU | 80000.00 Hz                  |
| FLT   | 40000 Hz                     |
| DELAY | 5.00 usec                    |
| ACQTM | 0.4096 sec                   |
| PD    | 4.9500 sec                   |
| ADBIT | 16                           |
| RGAIN | 14                           |
| BF    | 5.00 Hz                      |
| T1    | 0.00                         |
| T2    | 0.00                         |
| T3    | 90.00                        |
| T4    | 100.00                       |
| EXMOD | NON                          |
| EXPCM | NON:Single.coupled:PW1_ACQTM |
| IRNUC | 1H                           |
| IFR   | 399.65 MHz                   |
| IRSET | 124.00 KHz                   |
| IRFIN | 10500.00 Hz                  |
| IRRPW | 45 usec                      |
| IRATN | 511                          |
| DFILE | DEFAULT.ALS                  |
| SF    | TH5ATFG2                     |
| LKSET | 61.60 KHz                    |
| LKFIN | 79.0 Hz                      |
| LKLEV | 180                          |
| LGAIN | 25                           |
| LKPHS | 250                          |
| LKSIG | 1814                         |
| CSPED | 13 Hz                        |
| FILDC |                              |
| FILDF |                              |

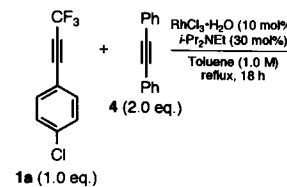

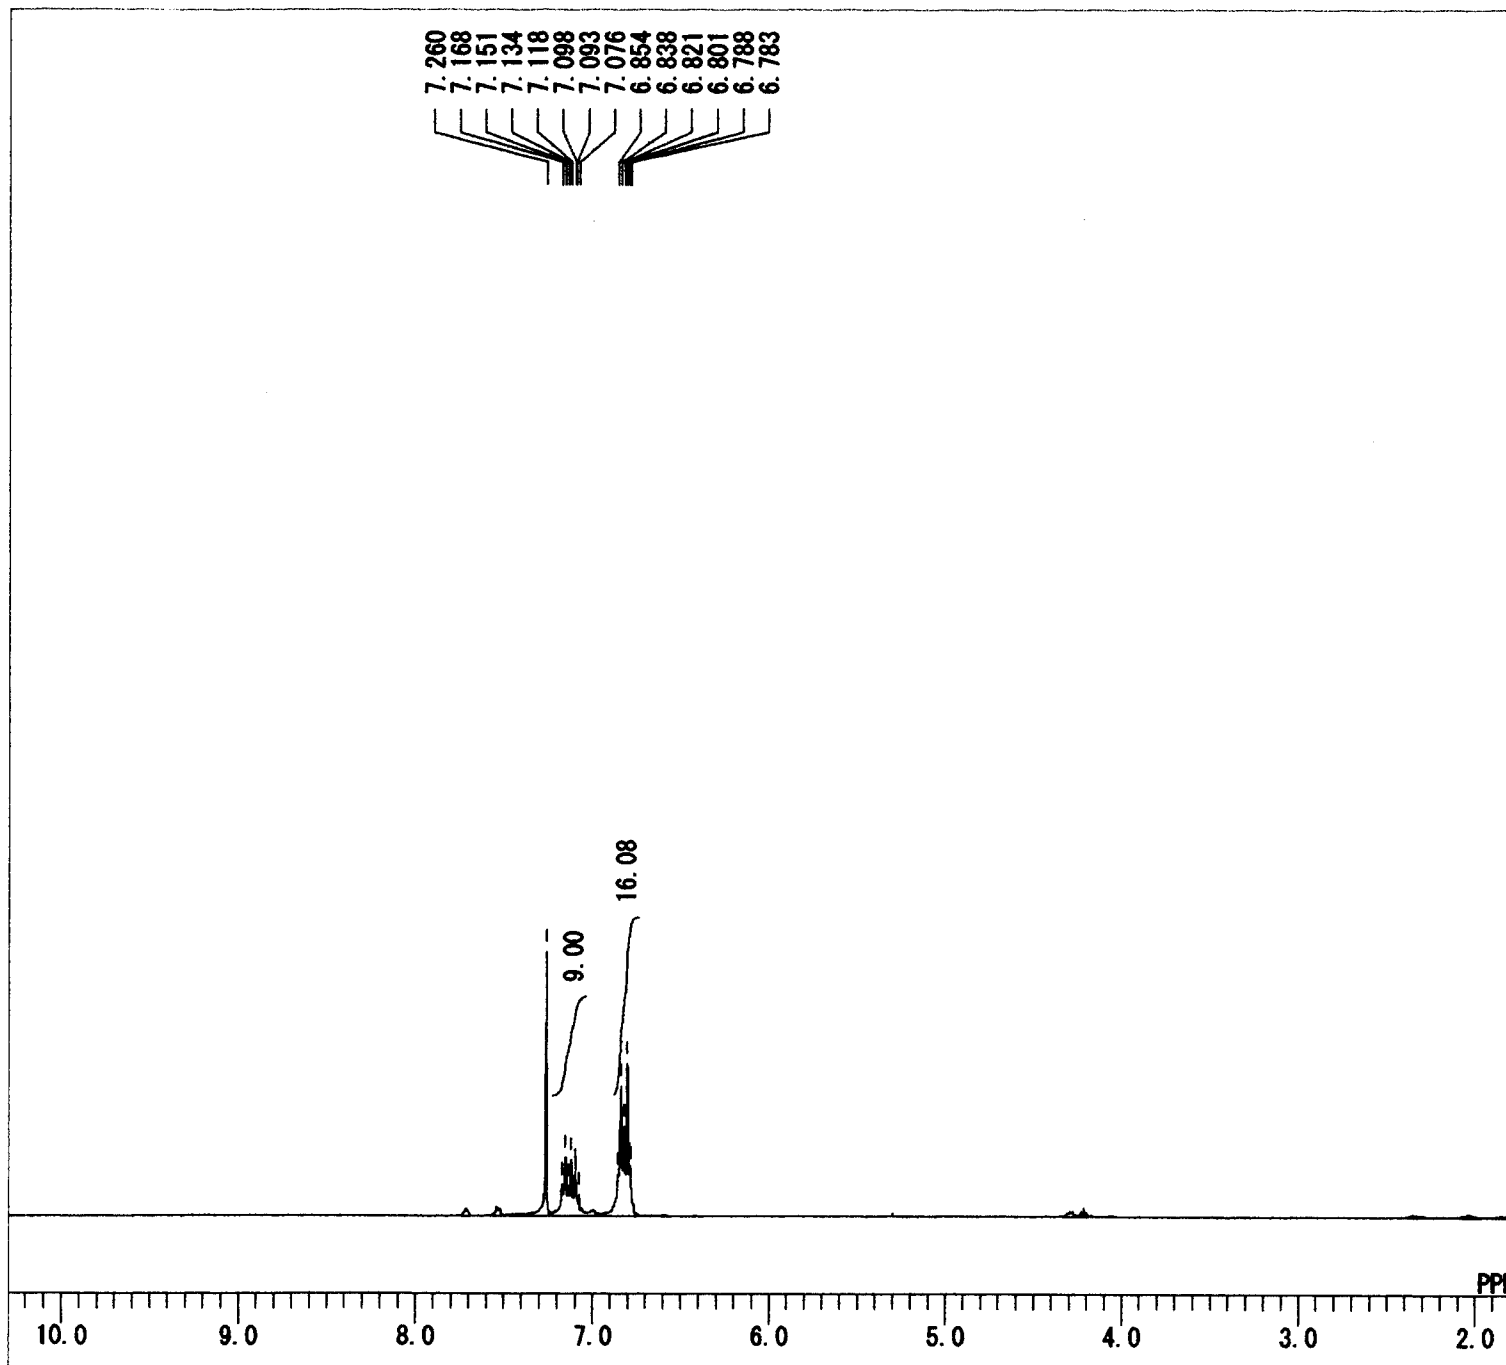

|       |                                |
|-------|--------------------------------|
| MENUF | 1H                             |
| OBNUC | 1H                             |
| OFR   | 399.65 MHz                     |
| OBSET | 135.40 KHz                     |
| OBFIN | 24.90 Hz                       |
| PW1   | 5.20 usec                      |
| DEADT | 72.40 usec                     |
| PREDL | 0.20000 msec                   |
| IWT   | 1.0000 msec                    |
| POINT | 16384                          |
| SPO   | 16384                          |
| TIMES | 8                              |
| DUMMY | 1                              |
| FREQU | 7992.01 Hz                     |
| FLT   | 4000 Hz                        |
| DELAY | 50.00 usec                     |
| ACQTM | 2.0501 sec                     |
| PD    | 4.9500 sec                     |
| ADBIT | 16                             |
| RGAIN | 19                             |
| BF    | 0.60 Hz                        |
| T1    | 0.00                           |
| T2    | 0.00                           |
| T3    | 90.00                          |
| T4    | 100.00                         |
| EXMOD | NON                            |
| EXPCM | NON:Single.coupled:PW1_ACQTM   |
| IRNUC | 1H                             |
| IFR   | 399.65 MHz                     |
| IRSET | 136.90 KHz                     |
| IRFIN | 97.50 Hz                       |
| IRRPW | 45 usec                        |
| IRATN | 511                            |
| DFILE | CF3-Ph+2diphenylacetylene (1H) |
| SF    | TH5ATFG2                       |
| LKSET | 61.60 KHz                      |
| LKFIN | 79.0 Hz                        |
| LKLEV | 180                            |
| LGAIN | 27                             |
| LKPHS | 222                            |
| LKSIG | 2703                           |
| CSPED | 14 Hz                          |
| FILDC |                                |
| FILDF |                                |

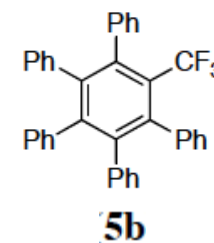

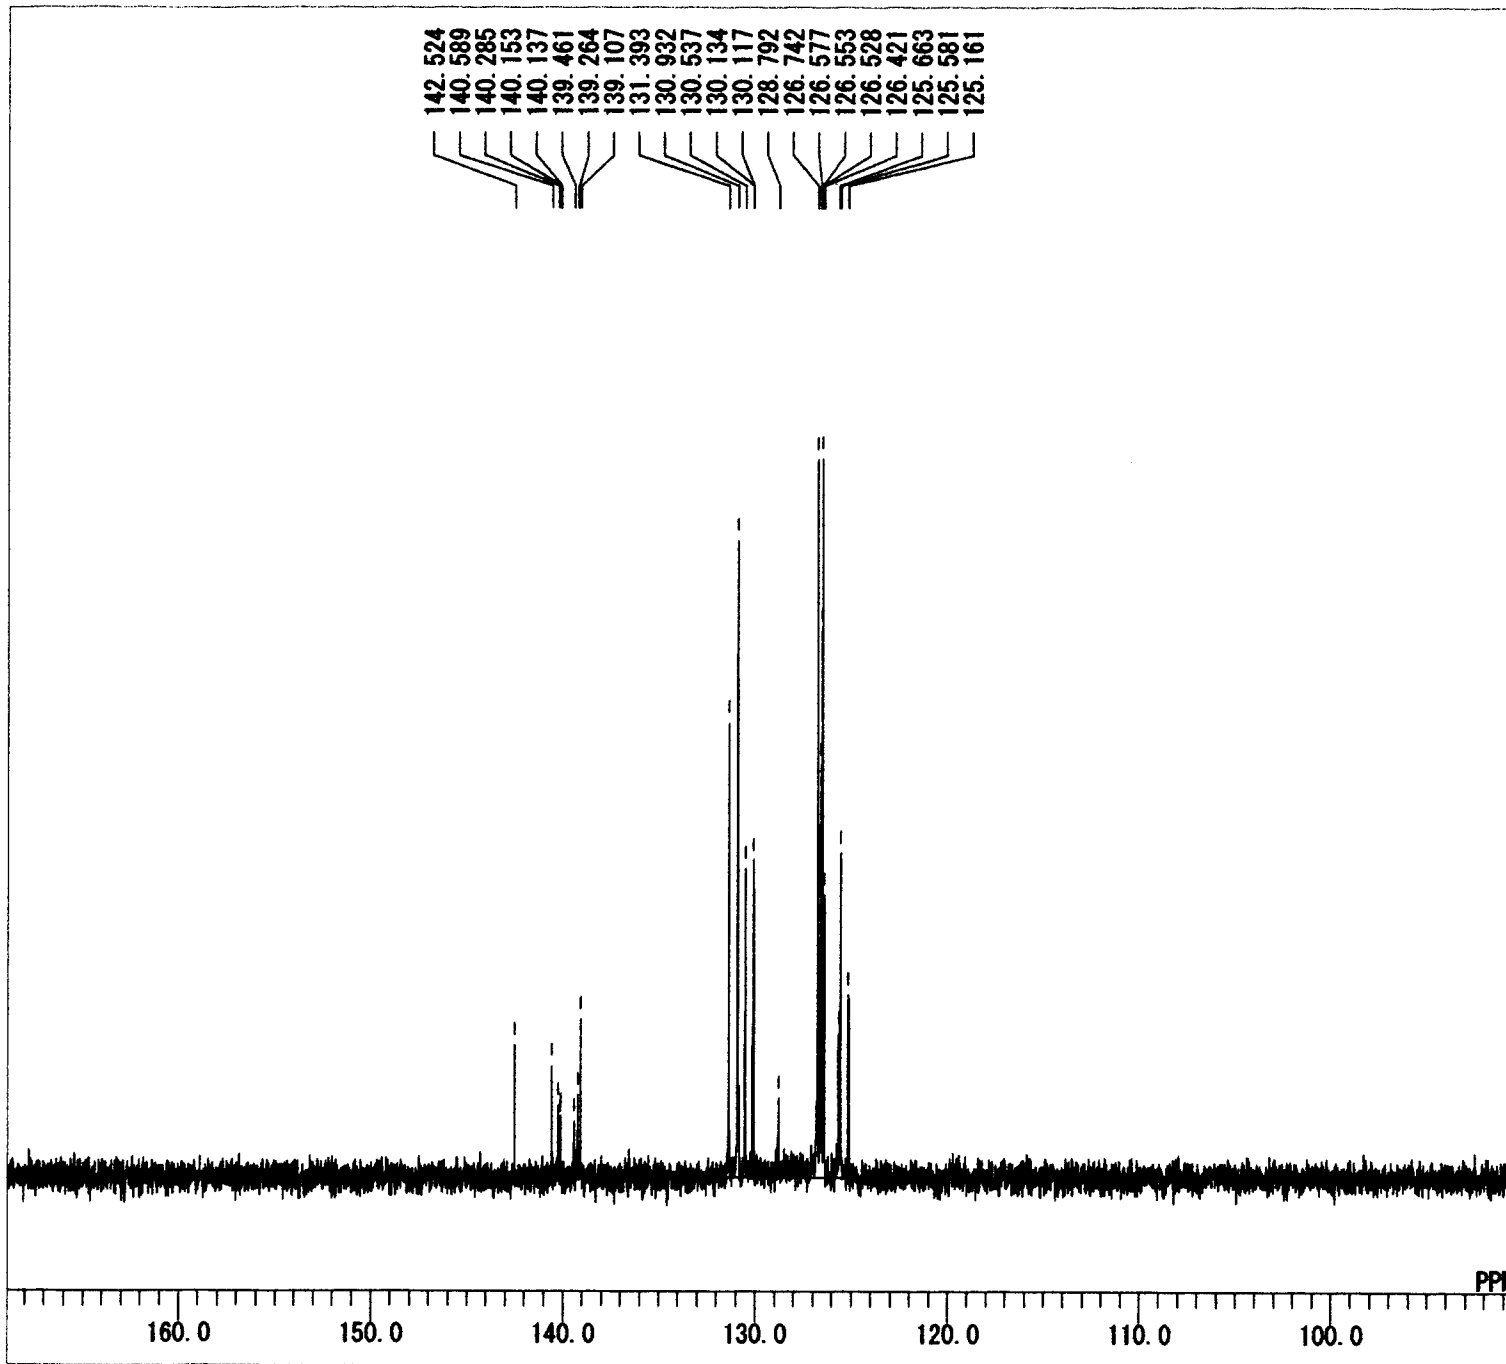

```

MNUF 13C
OBNUC 13C
OFR 100.40 MHz
OBSET 125.00 KHz
OBFIN 10500.00 Hz
PW1 6.00 usec
DEADT 19.10 usec
PREDL 0.20000 msec
IWT 1.0000 msec
POINT 32768
SPO 32768
TIMES 512
DUMMY 1
FREQU 27118.64 Hz
FLT 13550 Hz
DELAY 14.80 usec
ACQTM 1.2083 sec
PD 1.7920 sec
ADBIT 16
RGAIN 25
BF 0.60 Hz
T1 0.00
T2 0.00
T3 90.00
T4 100.00
EXMOD BCM
EXPCM Bilevel. complete. decoupling:
IRNUC 1H
IFR 399.65 MHz
IRSET 124.00 KHz
IRFIN 10500.00 Hz
IRRPW 45 usec
IRATN 511
DFILE CF3-Ph+2diphenylacetylene (13C
SF TH5ATFG2
LKSET 61.60 KHz
LKFIN 79.0 Hz
LKLEV 180
LGAIN 24
LKPHS 222
LKSIG 1049
CSPED 14 Hz
FILDC
FILDF

```

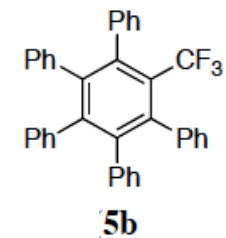

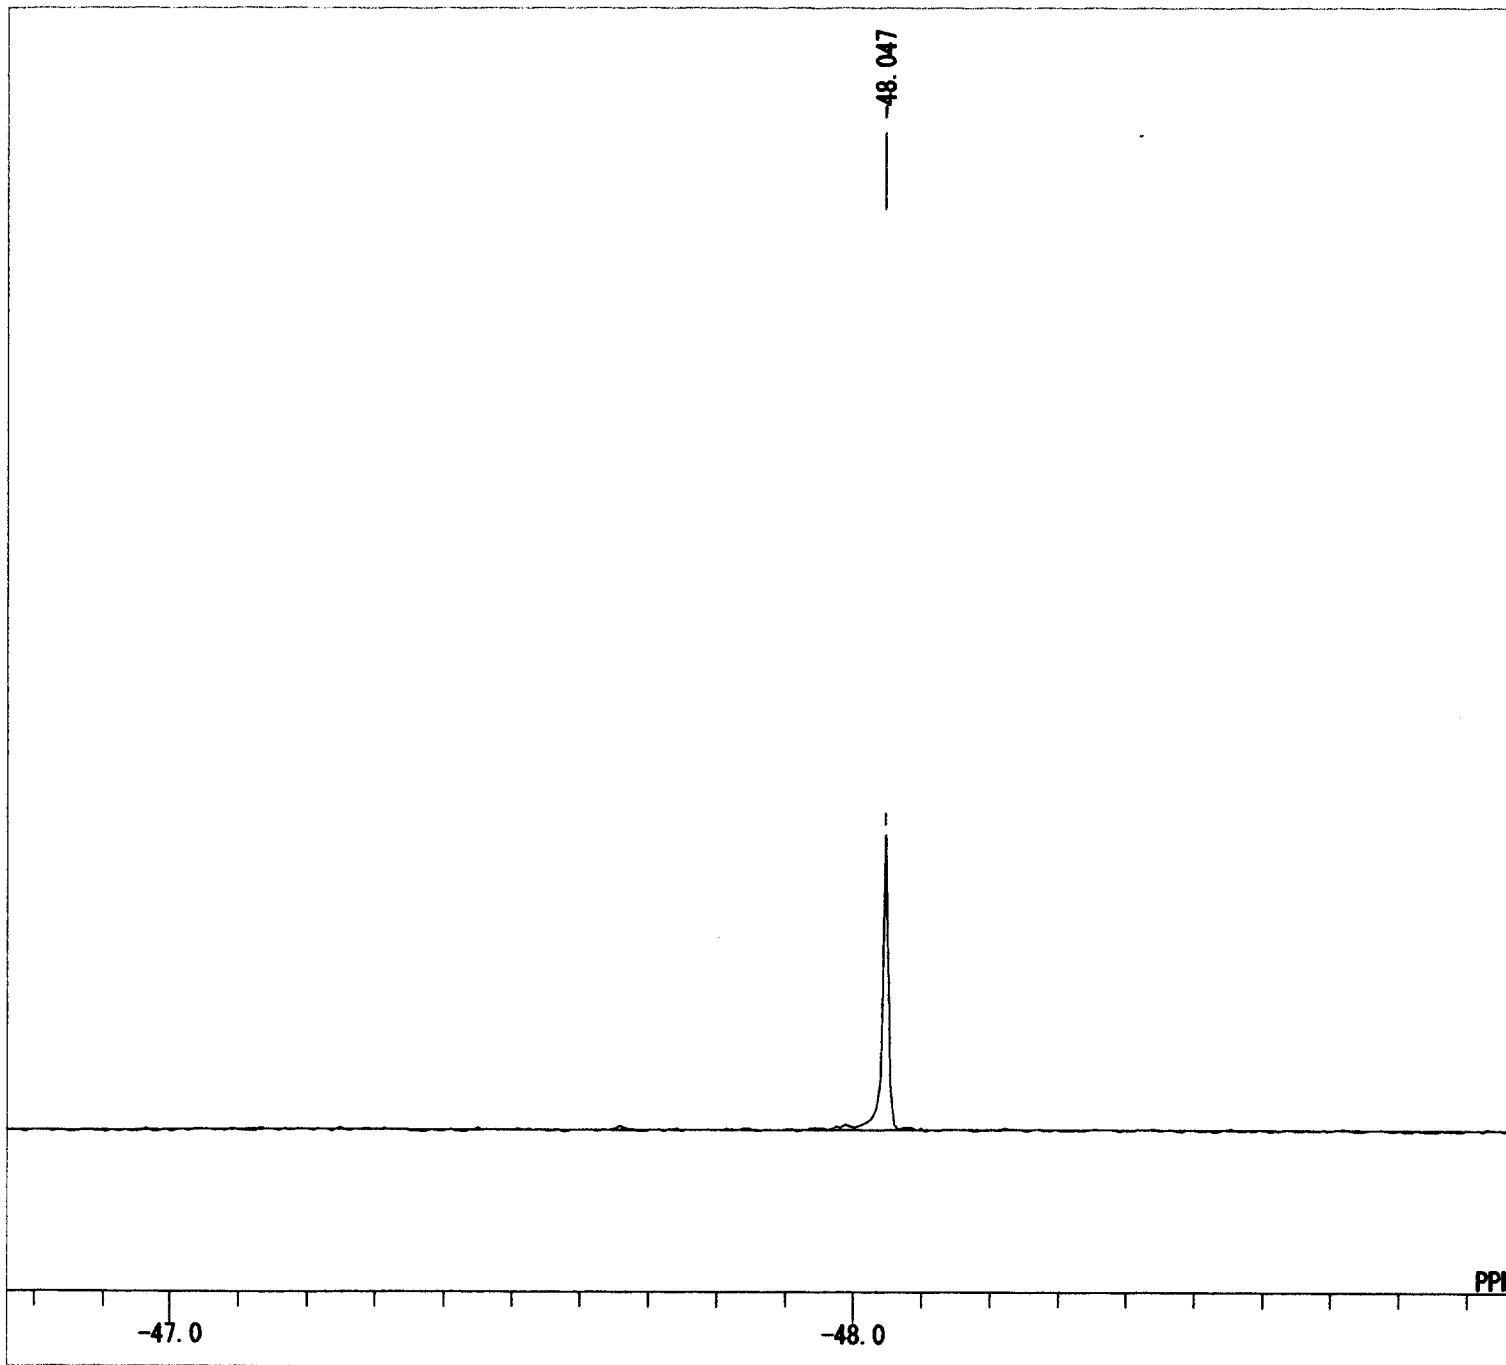

```

MENUF 19F
OBNUC 19F
OFR      376.05 MHz
OBSET    139.60 KHz
OBFIN    36.10 Hz
PW1      6.00 usec
DEADT    10.00 usec
PREDL    0.20000 msec
IWT      1.0000 msec
POINT    32768
SPO      32768
TIMES    16
DUMMY    1
FREQU    80000.00 Hz
FLT      40000 Hz
DELAY    5.00 usec
ACQTM    0.4096 sec
PD       4.9500 sec
ADBIT    16
RGAIN    14
BF       0.60 Hz
T1       0.00
T2       0.00
T3       90.00
T4       100.00
EXMOD    NON
EXPCM    NON:Single.coupled:PW1_ACQTM
IRNUC    1H
IFR      399.65 MHz
IRSET    124.00 KHz
IRFIN    10500.00 Hz
IRRPW    45 usec
IRATN    511
DFILE    CF3-Ph+2diphenylacetylene (19f
SF        TH5ATFG2
LKSET    61.60 KHz
LKFIN    79.0 Hz
LKLEV    180
LGA1N    27
LKPHS    222
LKSIG    2830
CSPED    14 Hz
FILDC
FILDF

```

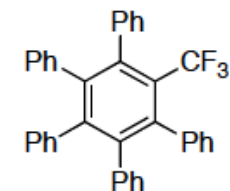

**5b**



# <sup>19</sup>F NMR Analysis of the reaction mixture (Total yield for all CF<sub>3</sub>-containing compounds : 90%)

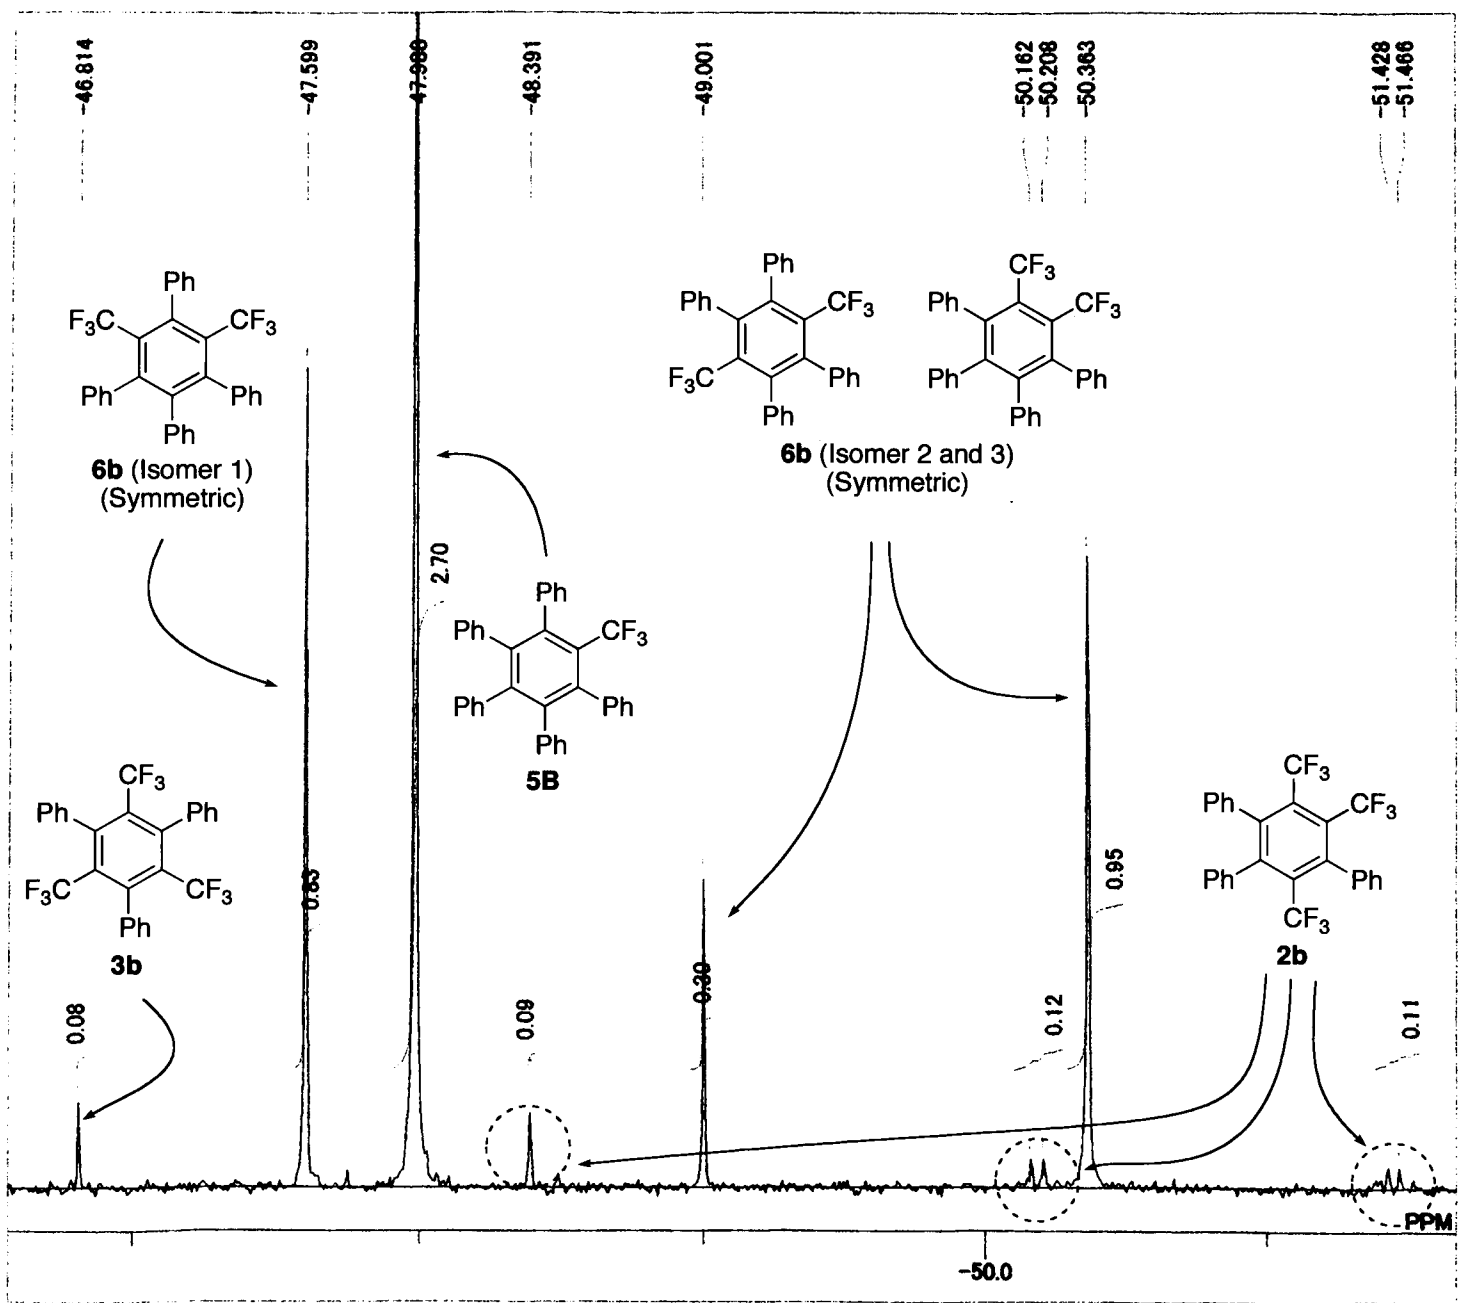

|       |                                  |
|-------|----------------------------------|
| MENUF | 19F                              |
| OBNUC | 19F                              |
| OFR   | 376.05 MHz                       |
| OBSET | 139.60 KHz                       |
| OBFIN | 36.10 Hz                         |
| PW1   | 6.00 usec                        |
| DEADT | 10.00 usec                       |
| PREDL | 0.20000 msec                     |
| IWT   | 1.0000 msec                      |
| POINT | 32768                            |
| SPO   | 32768                            |
| TIMES | 16                               |
| DUMMY | 1                                |
| FREQU | 80000.00 Hz                      |
| FLT   | 40000 Hz                         |
| DELAY | 5.00 usec                        |
| ACQTM | 0.4096 sec                       |
| PD    | 4.9500 sec                       |
| ADBIT | 16                               |
| RGAIN | 14                               |
| BF    | 0.60 Hz                          |
| T1    | 0.00                             |
| T2    | 0.00                             |
| T3    | 90.00                            |
| T4    | 100.00                           |
| EXMOD | NON                              |
| EXPCM | NON:Single.coupled:PW1_ACQTM_PD: |
| IRNUC | 1H                               |
| IFR   | 399.85 MHz                       |
| IRSET | 124.00 KHz                       |
| IRFIN | 10500.00 Hz                      |
| IRFPW | 45 usec                          |
| IRATN | 511                              |
| DFILE | _DEFAULT.ALS                     |
| SF    | TH5ATFG2                         |
| LKSET | 61.60 KHz                        |
| LKFIN | 79.0 Hz                          |
| LKLEV | 180                              |
| LGAIN | 24                               |
| LKPHS | 222                              |
| LKSIG | 1194                             |
| CSPED | 14 Hz                            |
| FILDC |                                  |
| FILDF |                                  |

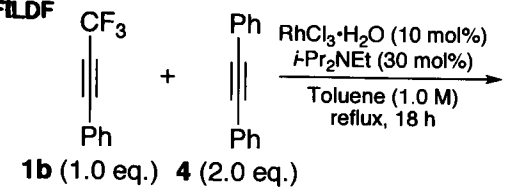

# After *one* silica gel column chromatography

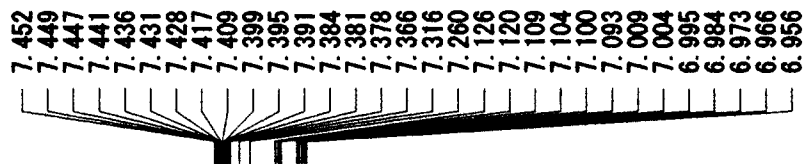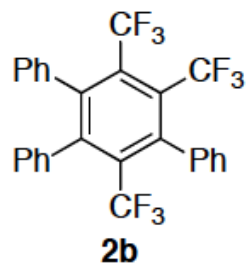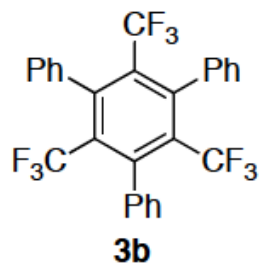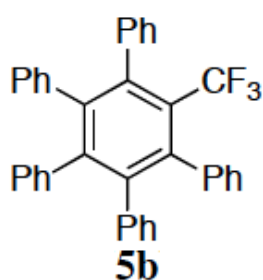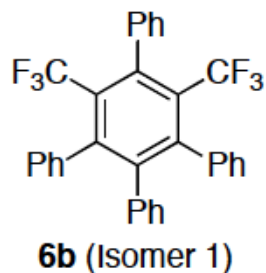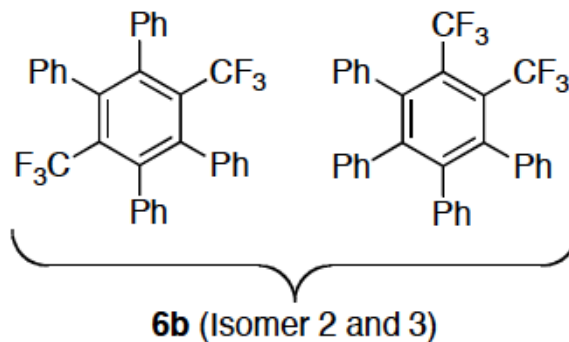

|       |                               |
|-------|-------------------------------|
| MENUF | 1H                            |
| OBNUC | 1H                            |
| OFR   | 399.65 MHz                    |
| OBSET | 135.40 KHz                    |
| OBFIN | 24.90 Hz                      |
| PW1   | 5.20 usec                     |
| DEADT | 72.40 usec                    |
| PREDL | 0.2000 msec                   |
| IWT   | 1.0000 msec                   |
| POINT | 16384                         |
| SPO   | 16384                         |
| TIMES | 8                             |
| DUMMY | 1                             |
| FREQU | 7992.01 Hz                    |
| FLT   | 4000 Hz                       |
| DELAY | 50.00 usec                    |
| ACQTM | 2.0501 sec                    |
| PD    | 4.9500 sec                    |
| ADBIT | 16                            |
| RGAIN | 17                            |
| BF    | 0.10 Hz                       |
| T1    | 0.00                          |
| T2    | 0.00                          |
| T3    | 90.00                         |
| T4    | 100.00                        |
| EXMOD | NON                           |
| EXPCM | NON:Single.coupled:PW1_ACQTM. |
| IRNUC | 1H                            |
| IFR   | 399.65 MHz                    |
| IRSET | 136.90 KHz                    |
| IRFIN | 97.50 Hz                      |
| IRRPW | 45 usec                       |
| IRATN | 511                           |
| DFILE | bypro-CF3-Ph-diPh(1H).als     |
| SF    | TH5ATFG2                      |
| LKSET | 61.60 KHz                     |
| LKFIN | 79.0 Hz                       |
| LKLEV | 180                           |
| LGAIN | 24                            |
| LKPHS | 219                           |
| LKSIG | 1638                          |
| CSPED | 11 Hz                         |
| FILDC |                               |
| FILDF |                               |

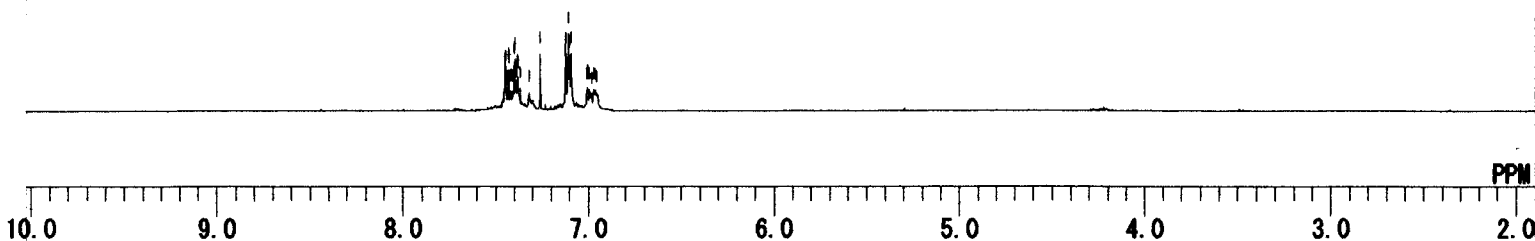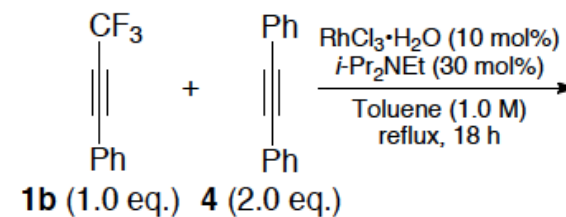

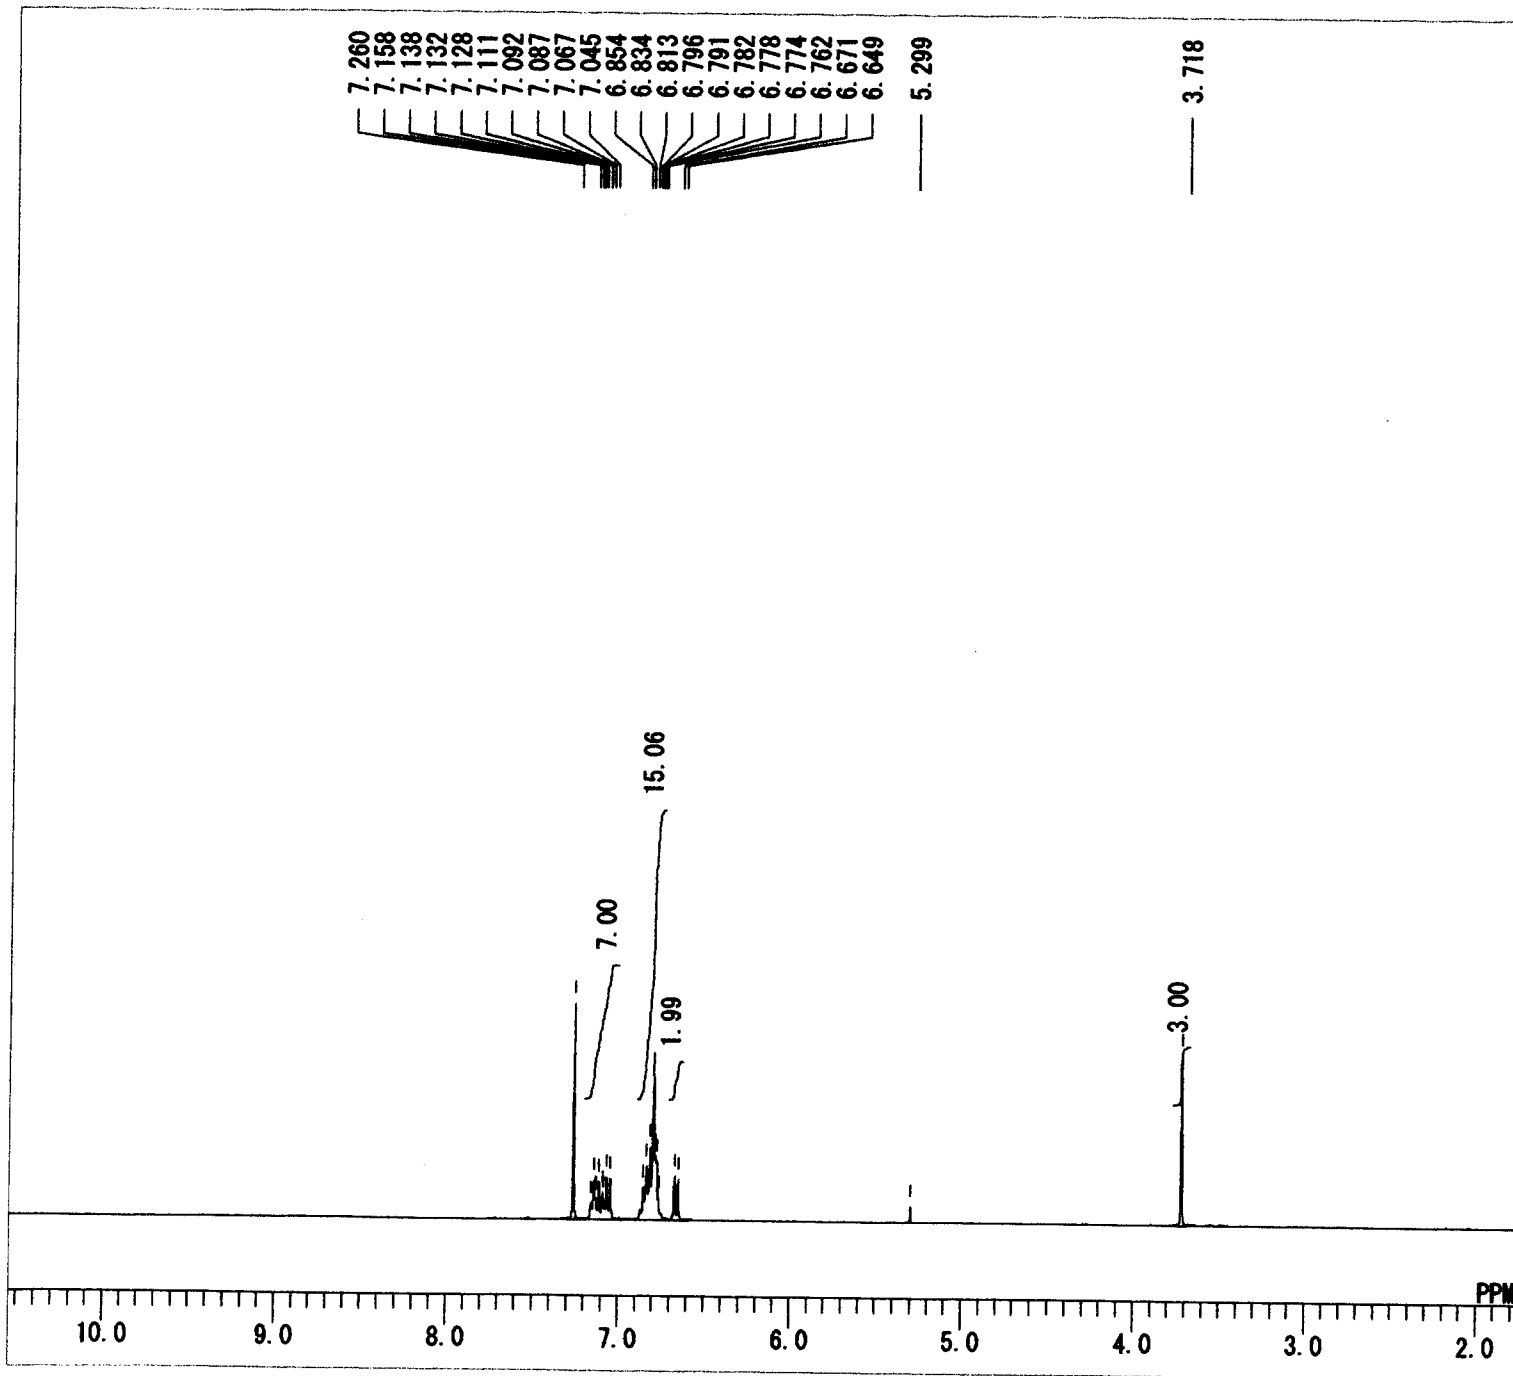

|       |                              |
|-------|------------------------------|
| MENUF | 1H                           |
| OBNUC | 1H                           |
| OFR   | 399.65 MHz                   |
| OBSET | 135.40 KHz                   |
| OBFIN | 24.90 Hz                     |
| PW1   | 5.20 usec                    |
| DEADT | 72.40 usec                   |
| PREDL | 0.20000 msec                 |
| IWT   | 1.0000 msec                  |
| POINT | 16384                        |
| SPO   | 16384                        |
| TIMES | 8                            |
| DUMMY | 1                            |
| FREQU | 7992.01 Hz                   |
| FLT   | 4000 Hz                      |
| DELAY | 50.00 usec                   |
| ACQTM | 2.0501 sec                   |
| PD    | 4.9500 sec                   |
| ADBIT | 16                           |
| RGAIN | 21                           |
| BF    | 0.60 Hz                      |
| T1    | 0.00                         |
| T2    | 0.00                         |
| T3    | 90.00                        |
| T4    | 100.00                       |
| EXMOD | NON                          |
| EXPCM | NON:Single.coupled:PW1_ACQTM |
| IRNUC | 1H                           |
| IFR   | 399.65 MHz                   |
| IRSET | 136.90 KHz                   |
| IRFIN | 97.50 Hz                     |
| IRRPW | 45 usec                      |
| IRATN | 511                          |
| DFILE | CF3-PhOMe+2diphenylacetylene |
| SF    | TH5ATFG2                     |
| LKSET | 61.60 KHz                    |
| LKFIN | 79.0 Hz                      |
| LKLEV | 180                          |
| LGAIN | 22                           |
| LKPHS | 222                          |
| LKSIG | 823                          |
| CSPED | 13 Hz                        |
| FILDC |                              |
| FILDF |                              |

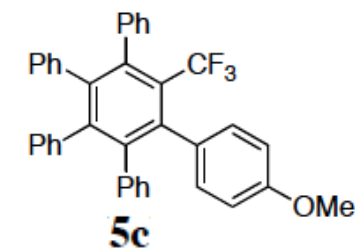

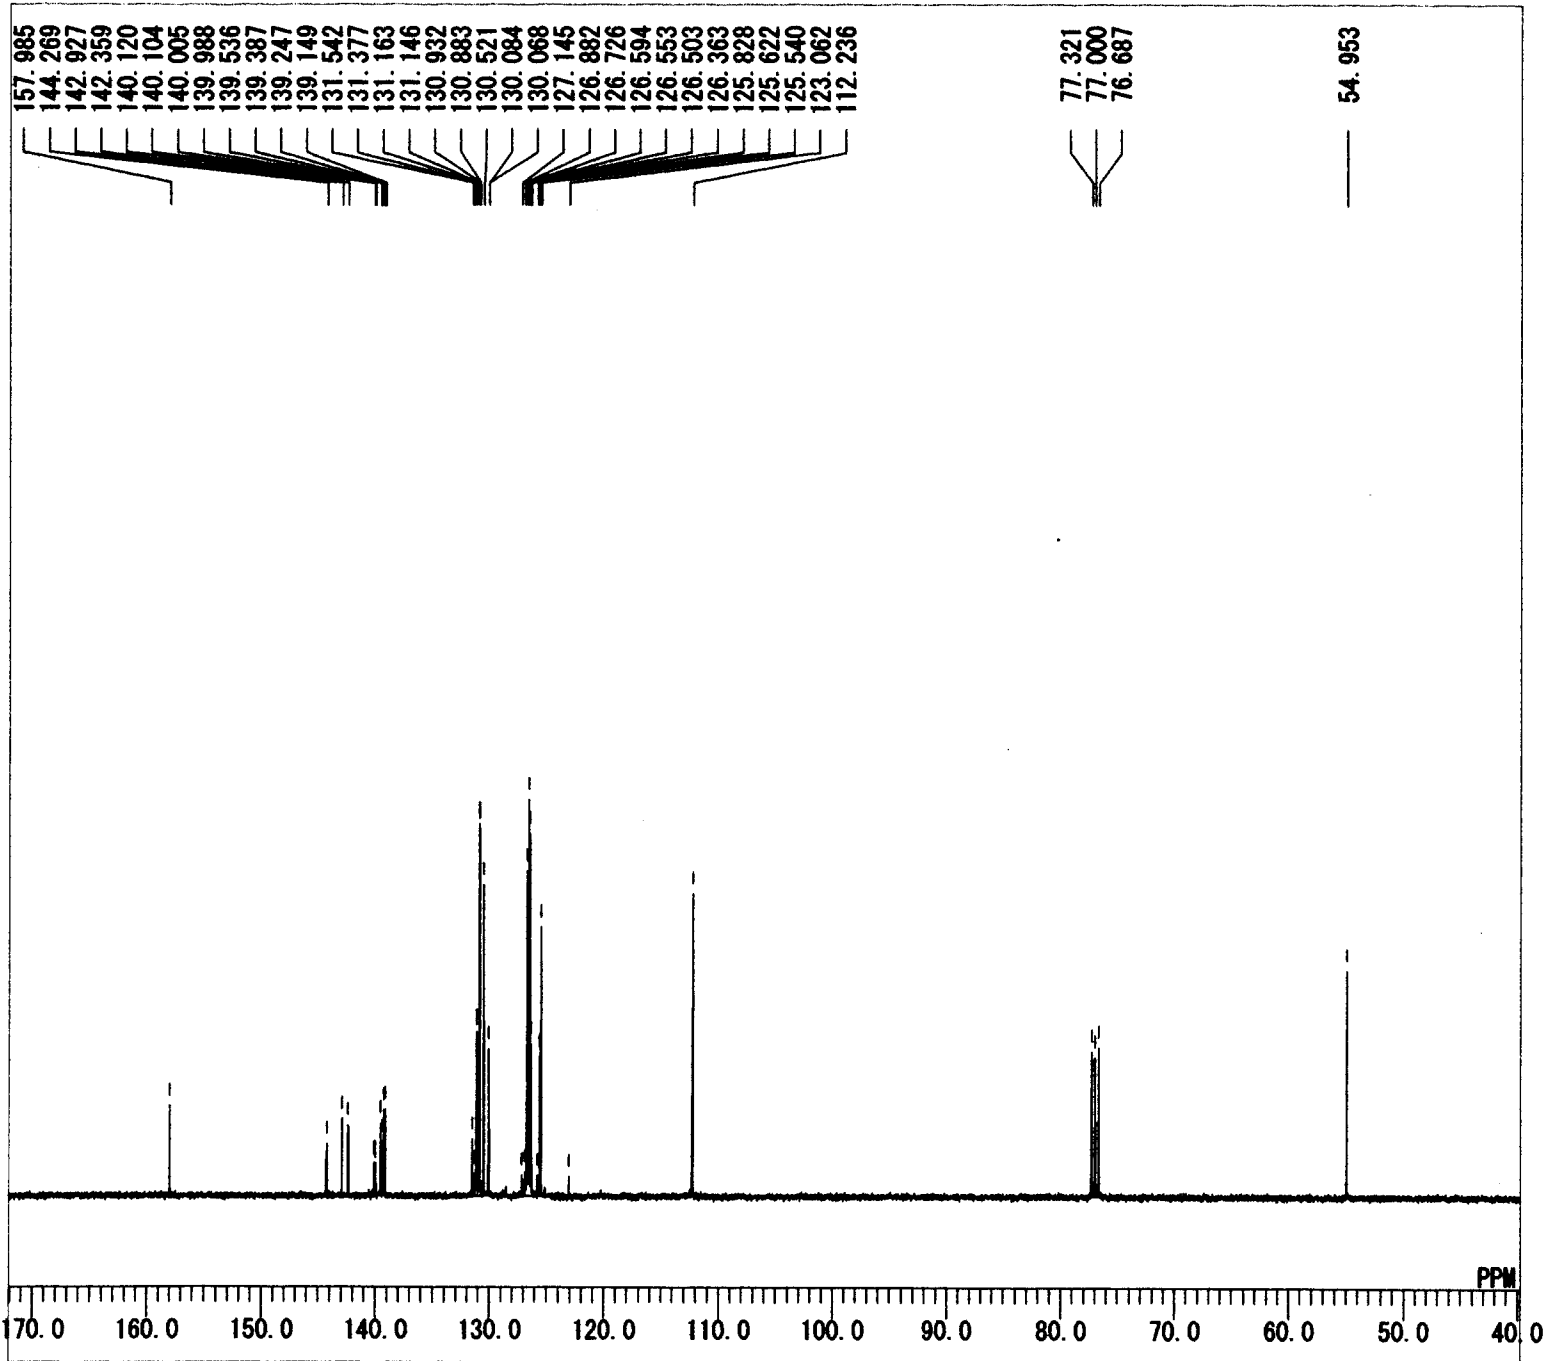

MENUF 13C  
 OBNUC 13C  
 OFR 100.40 MHz  
 OBSET 125.00 KHz  
 OBFIN 10500.00 Hz  
 PW1 6.00 usec  
 DEADT 19.10 usec  
 PREDL 0.20000 msec  
 IWT 1.0000 msec  
 POINT 32768  
 SPO 32768  
 TIMES 512  
 DUMMY 1  
 FREQU 27118.64 Hz  
 FLT 13550 Hz  
 DELAY 14.80 usec  
 ACQTM 1.2083 sec  
 PD 1.7920 sec  
 ADBIT 16  
 RGA IN 25  
 BF 0.60 Hz  
 T1 0.00  
 T2 0.00  
 T3 90.00  
 T4 100.00  
 EXMOD BCM  
 EXPCM Bilevel. complete. decoupling:  
 IRNUC 1H  
 IFR 399.65 MHz  
 IRSET 124.00 KHz  
 IRFIN 10500.00 Hz  
 IRRPW 45 usec  
 IRATN 511  
 DFILE CF3-PhOMe+2diphenylacetylene  
 SF TH5ATFG2  
 LKSET 61.60 KHz  
 LKFIN 79.0 Hz  
 LKLEV 180  
 LGAIN 23  
 LKPHS 222  
 LKSIG 732  
 CSPED 13 Hz  
 FILDC  
 FILDF

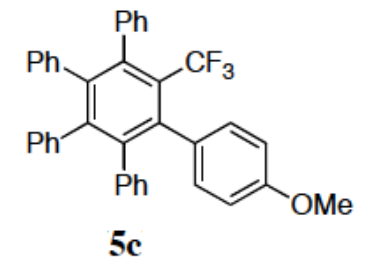

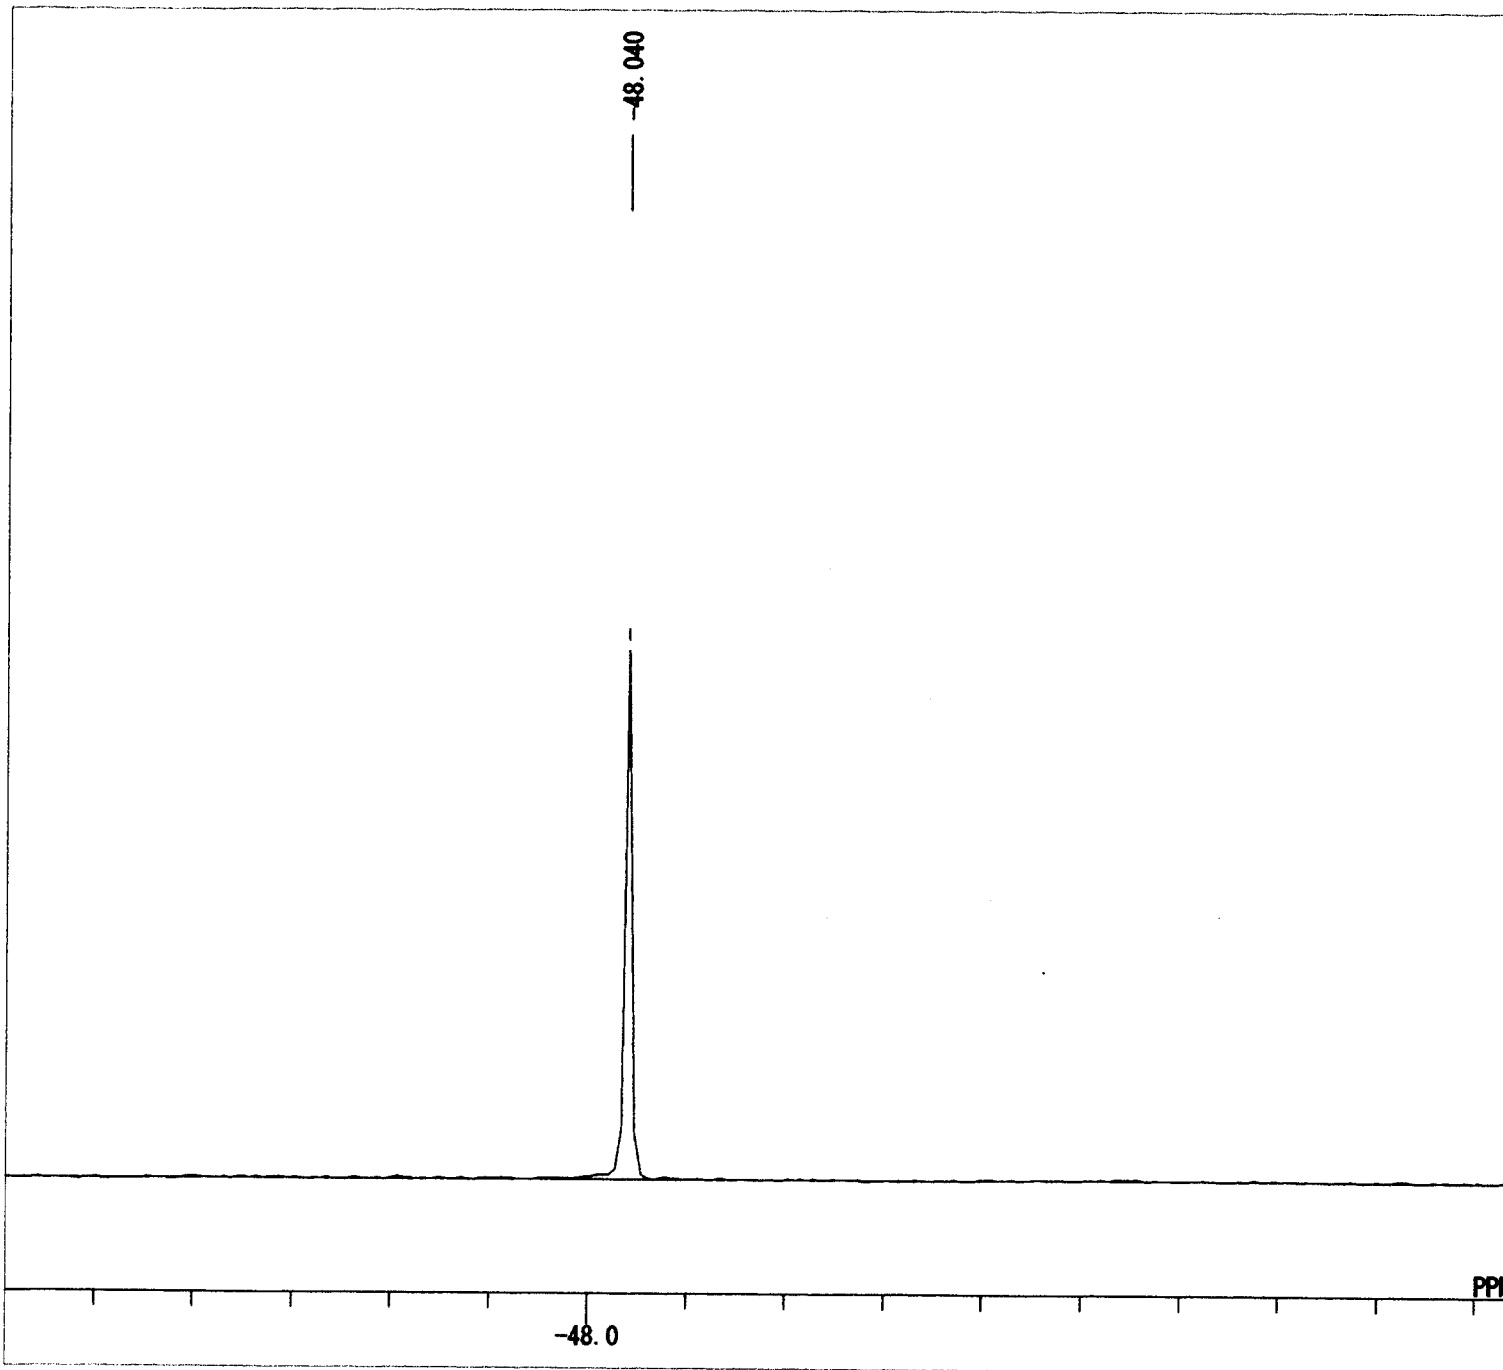

```

MENUF 19F
OBNUC 19F
OFR 376.05 MHz
OBSET 139.60 KHz
OBFIN 36.10 Hz
PW1 6.00 usec
DEADT 10.00 usec
PREDL 0.20000 msec
IWT 1.0000 msec
POINT 32768
SPO 32768
TIMES 16
DUMMY 1
FREQU 80000.00 Hz
FLT 40000 Hz
DELAY 5.00 usec
ACQTM 0.4096 sec
PD 4.9500 sec
ADBIT 16
RGAIN 14
BF 0.60 Hz
T1 0.00
T2 0.00
T3 90.00
T4 100.00
EXMOD NON
EXPCM NON:Single.coupled:PW1_ACQTM
IRNUC 1H
IFR 399.65 MHz
IRSET 124.00 KHz
IRFIN 10500.00 Hz
IRRPW 45 usec
IRATN 511
DFILE CF3-PhOMe+2diphenylacetylene
SF TH5ATFG2
LKSET 61.60 KHz
LKFIN 79.0 Hz
LKLEV 180
LGAIN 22
LKPHS 222
LKSIG 842
CSPED 13 Hz
FILDC
FILDF

```

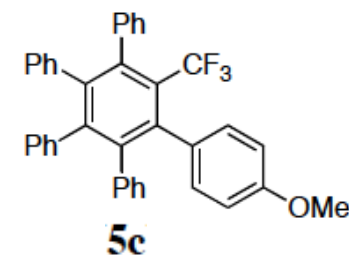

# <sup>19</sup>F NMR Analysis of the reaction mixture (Total yield for all CF<sub>3</sub>-containing compounds : 89%)

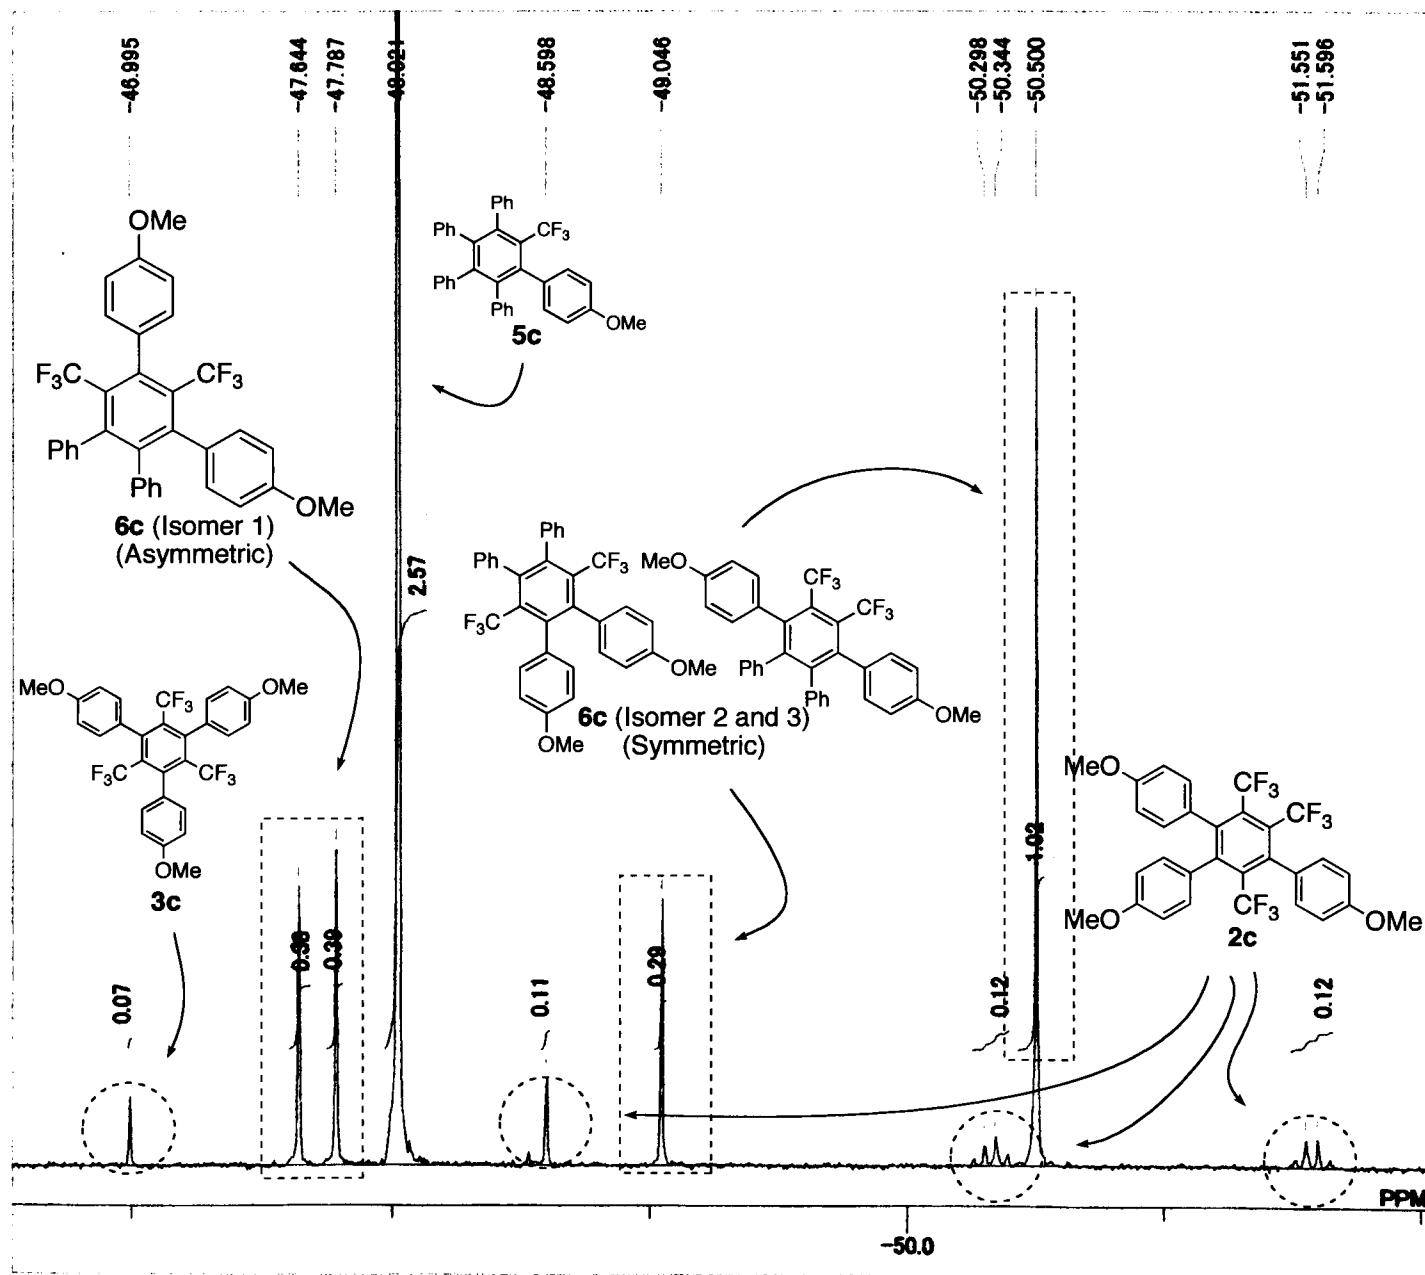

|       |                                  |
|-------|----------------------------------|
| MENUF | 19F                              |
| OBNUC | 19F                              |
| OFR   | 376.05 MHz                       |
| OBSET | 139.60 KHz                       |
| OBFIN | 36.10 Hz                         |
| PW1   | 6.00 usec                        |
| DEADT | 10.00 usec                       |
| PREDL | 0.20000 msec                     |
| IWT   | 1.0000 msec                      |
| POINT | 32768                            |
| SPO   | 32768                            |
| TIMES | 16                               |
| DUMMY | 1                                |
| FREQU | 80000.00 Hz                      |
| FLT   | 40000 Hz                         |
| DELAY | 5.00 usec                        |
| ACQTM | 0.4086 sec                       |
| PD    | 4.9500 sec                       |
| ADBIT | 16                               |
| RGAIN | 14                               |
| BF    | 0.60 Hz                          |
| T1    | 0.00                             |
| T2    | 0.00                             |
| T3    | 90.00                            |
| T4    | 100.00                           |
| EXMOD | NON                              |
| EXPCM | NON:Single.coupled:PW1_ACQTM_PD: |
| IRNUC | 1H                               |
| IFR   | 399.65 MHz                       |
| IRSET | 124.00 KHz                       |
| IRFIN | 10500.00 Hz                      |
| IRPW  | 45 usec                          |
| IRATN | 511                              |
| DFILE | _DEFAULT.ALS                     |
| SF    | TH5ATFG2                         |
| LKSET | 61.60 KHz                        |
| LKFIN | 79.0 Hz                          |
| LKLEV | 180                              |
| LGAIN | 24                               |
| LKPHS | 222                              |
| LKSIG | 1243                             |
| CSPED | 13 Hz                            |
| FILDC |                                  |
| FILDF |                                  |

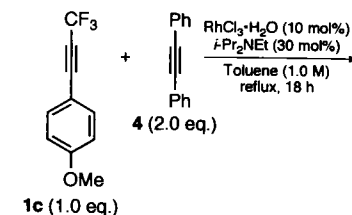

# After *one* silica gel column chromatography

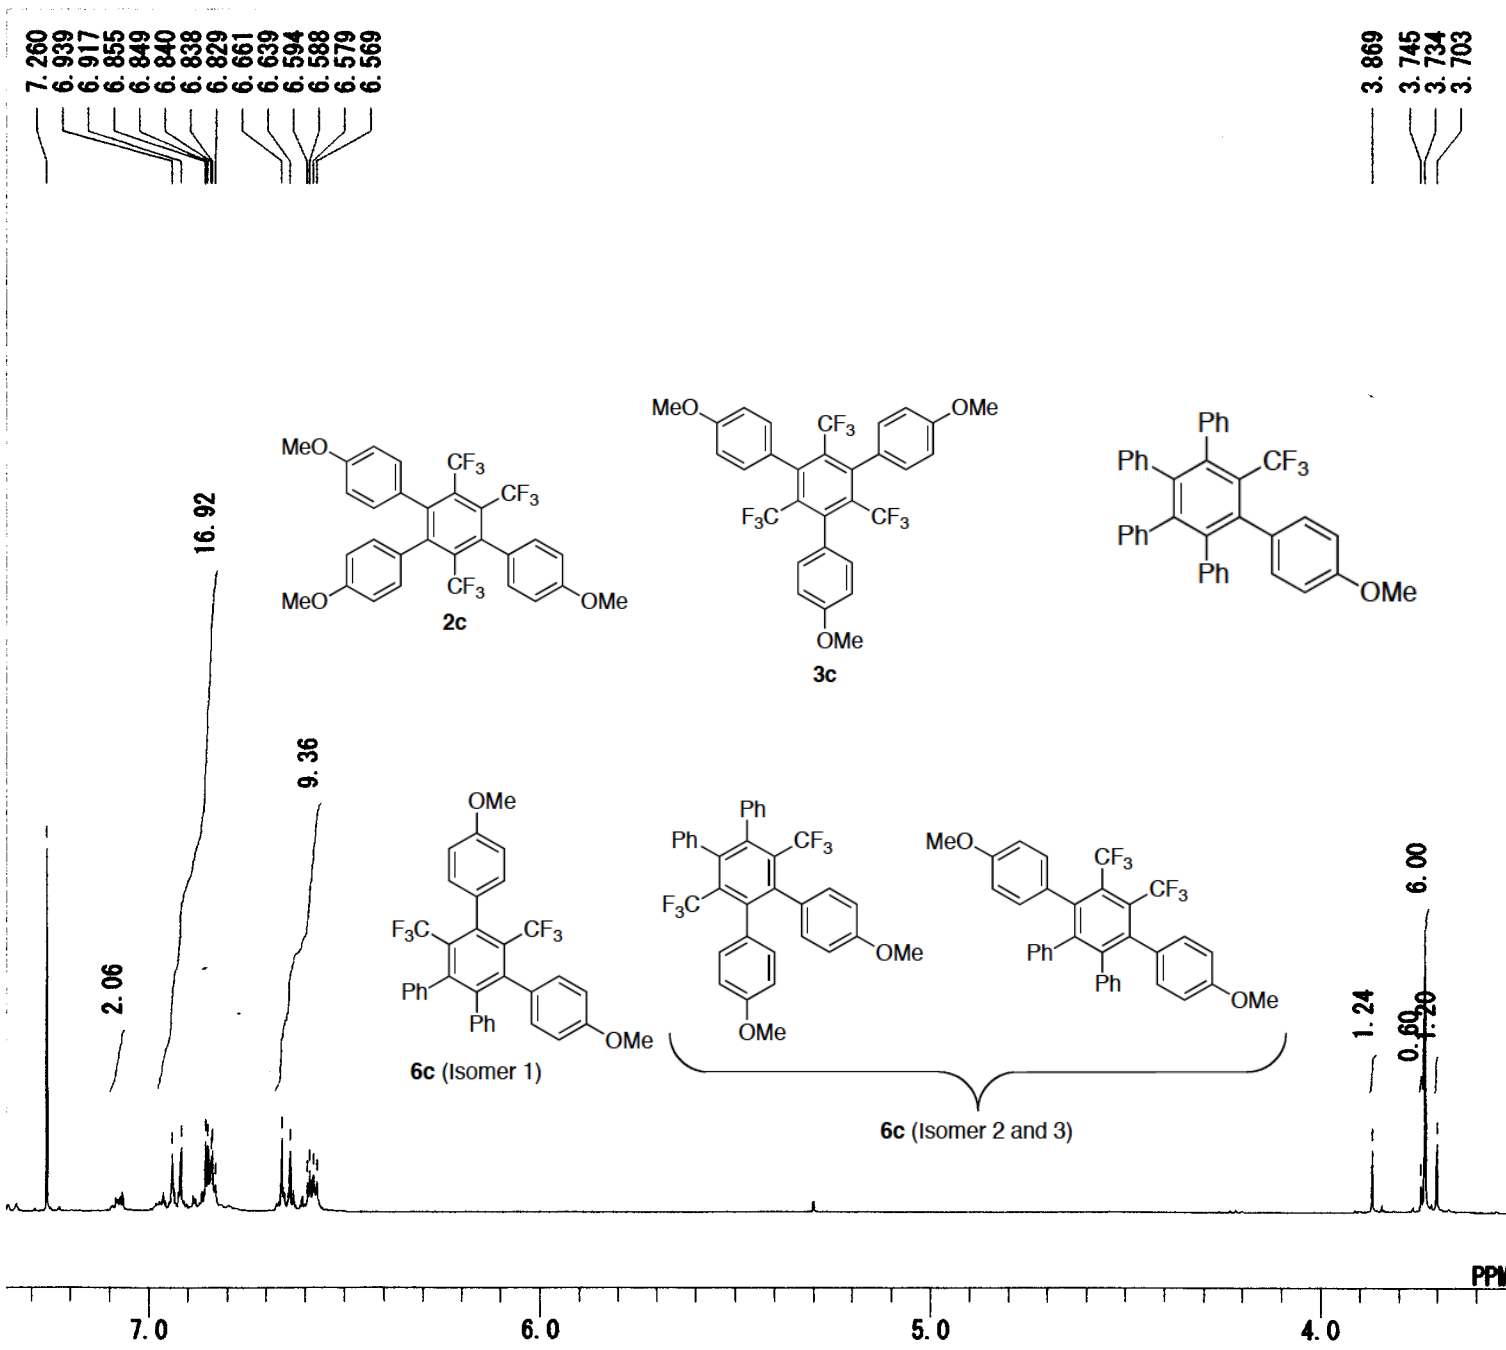

|       |                              |
|-------|------------------------------|
| MENUF | 1H                           |
| OBNUC | 1H                           |
| OFR   | 399.65 MHz                   |
| OBSET | 135.40 KHz                   |
| OBFIN | 24.90 Hz                     |
| PW1   | 5.80 usec                    |
| DEADT | 72.10 usec                   |
| PREDL | 0.20000 msec                 |
| IWT   | 1.0000 msec                  |
| POINT | 16384                        |
| SPO   | 16384                        |
| TIMES | 32                           |
| DUMMY | 1                            |
| FREQU | 7992.01 Hz                   |
| FLT   | 4000 Hz                      |
| DELAY | 50.00 usec                   |
| ACQTM | 2.0501 sec                   |
| PD    | 4.9500 sec                   |
| ADBIT | 16                           |
| RGAIN | 21                           |
| BF    | 0.10 Hz                      |
| T1    | 0.00                         |
| T2    | 0.00                         |
| T3    | 90.00                        |
| T4    | 100.00                       |
| EXMOD | NON                          |
| EXPCM | NON:Single.coupled:PW1_ACQTM |
| IRNUC | 1H                           |
| IFR   | 399.65 MHz                   |
| IRSET | 136.90 KHz                   |
| IRFIN | 97.50 Hz                     |
| IRRPW | 45 usec                      |
| IRATN | 511                          |
| DFILE | bypro-CF3-p-MeO-diPh(1H).als |
| SF    | TH5ATFG2                     |
| LKSET | 61.60 KHz                    |
| LKFIN | 79.0 Hz                      |
| LKLEV | 180                          |
| LGAIN | 23                           |
| LKPHS | 250                          |
| LKSIG | 1093                         |
| CSPED | 13 Hz                        |
| FILDC |                              |
| FILDF |                              |

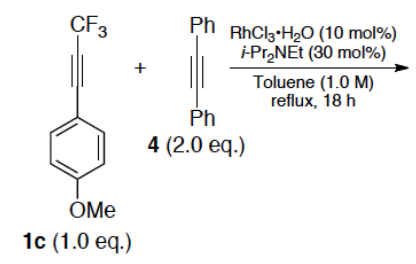

# After *one* silica gel column chromatography

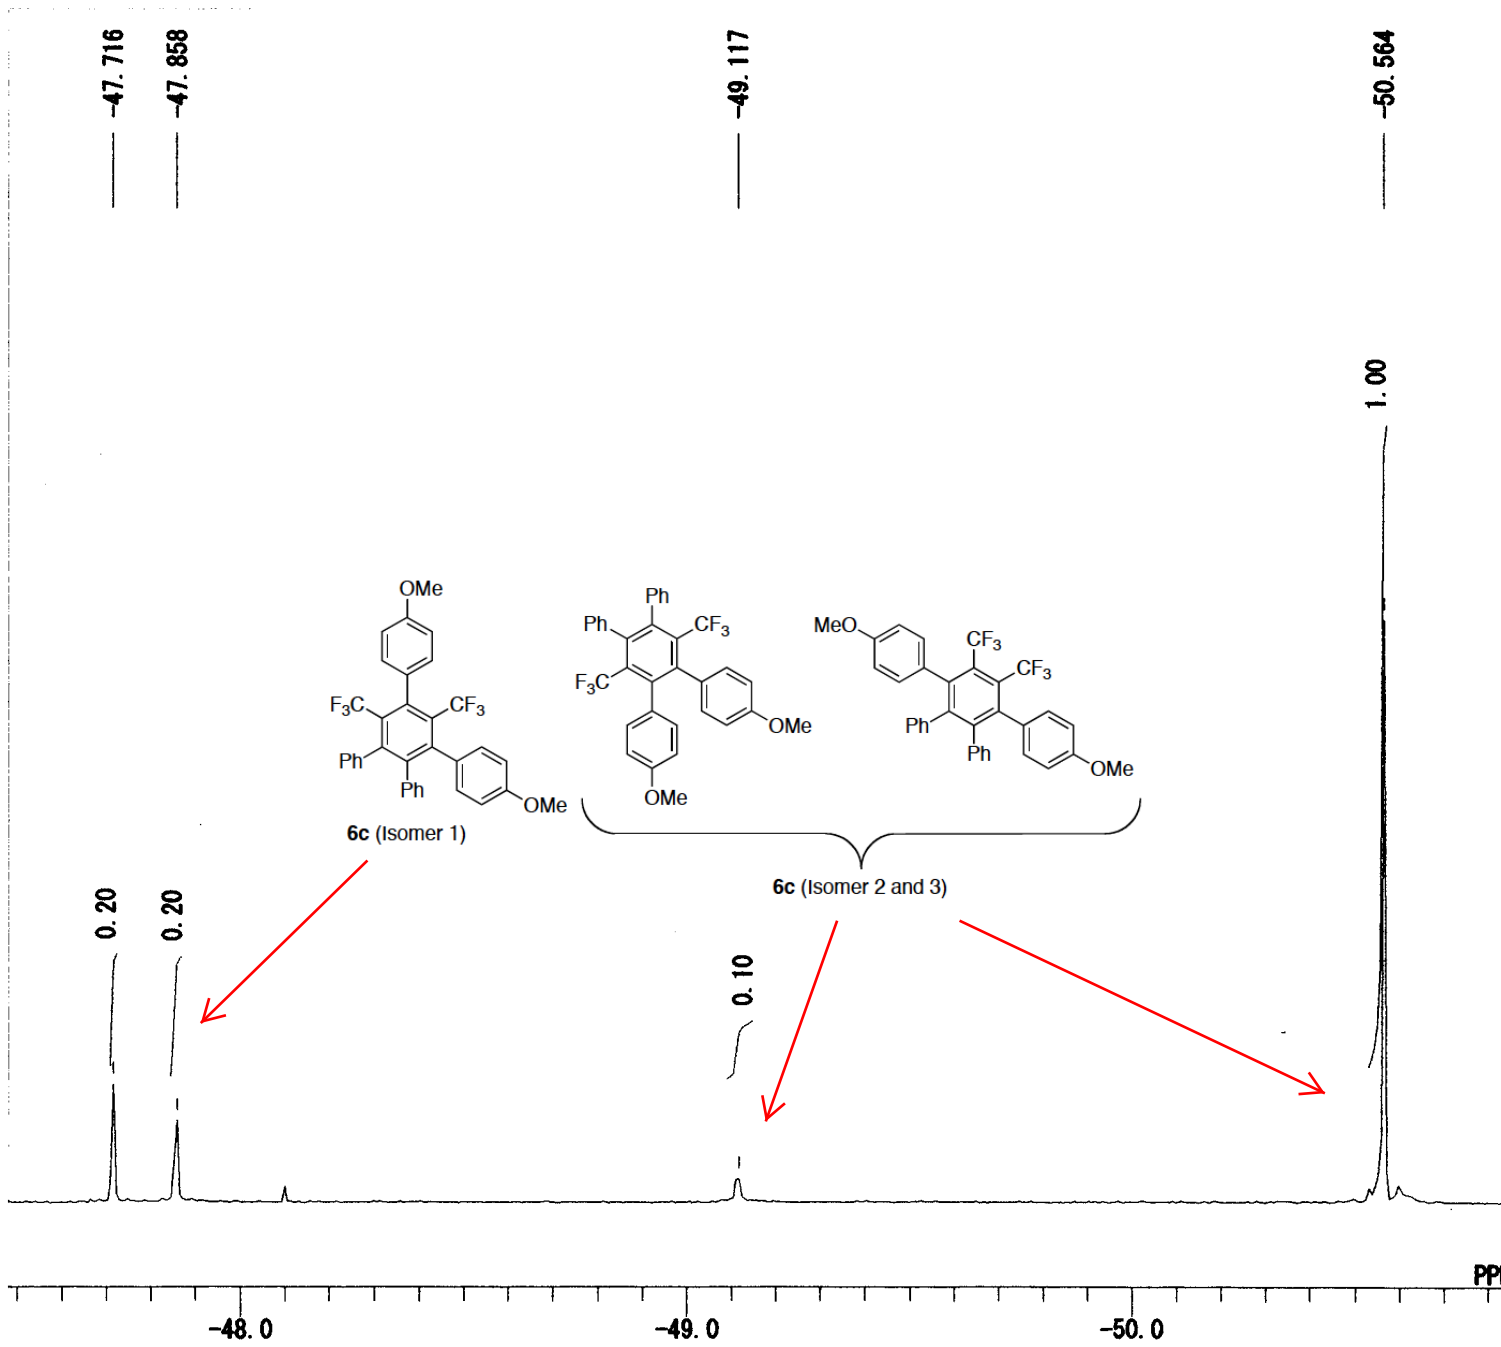

```

NAME      OBNUC      19F
OFR       376.05 MHz
OBSET     139.60 KHz
OBFIN     36.10 Hz
PW1       6.00 usec
DEADT     10.00 usec
PREDL     0.20000 msec
IWT       1.0000 msec
POINT     32768
SPO       32768
TIMES     16
DUMMY     1
FREQU     80000.00 Hz
FLT       40000 Hz
DELAY     5.00 usec
ACQTM     0.4096 sec
PD        4.9500 sec
ADBIT     16
RGAIN     14
BF        0.10 Hz
T1        0.00
T2        0.00
T3        90.00
T4        100.00
EXMOD     NON
EXPCM     NON:Single.coupled:PW1_ACQTM
IRNUC     1H
IFR       399.65 MHz
IRSET     124.00 KHz
IRFIN     10500.00 Hz
IRRPW     45 usec
IRATN     511
DFILE     bypro-CF3-p-MeO-diPh(19F).al:
SF        TH5ATFG2
LKSET     61.60 KHz
LKFIN     79.0 Hz
LKLEV     180
LGAIN     23
LKPHS     250
LKSIG     1080
CSPED     13 Hz
FILDC
FILDF
    
```

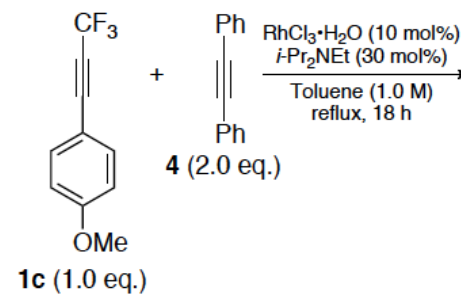



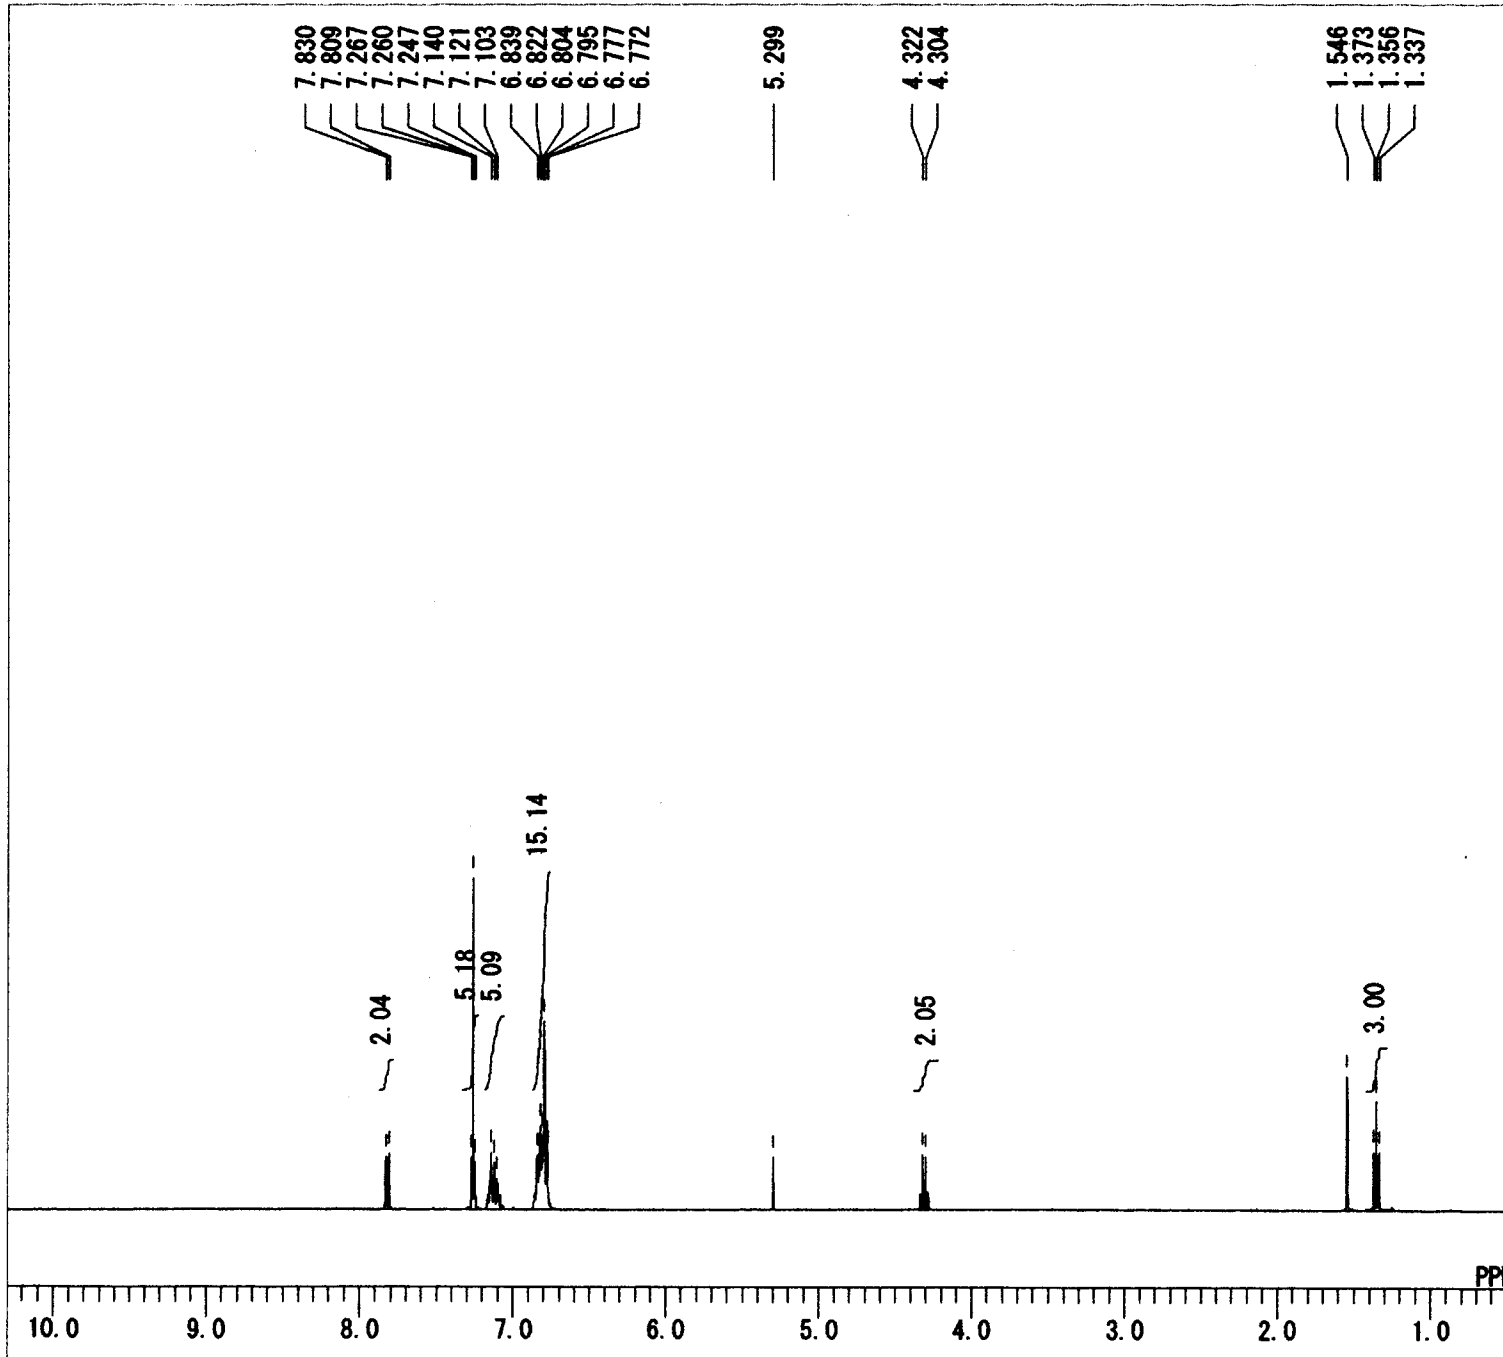

MENUF 1H  
 OBNUC 1H  
 OFR 399.65 MHz  
 OBSET 135.40 KHz  
 OBFIN 24.90 Hz  
 PW1 5.20 usec  
 DEADT 72.40 usec  
 PREDL 0.20000 msec  
 IWT 1.0000 msec  
 POINT 16384  
 SPO 16384  
 TIMES 8  
 DUMMY 1  
 FREQU 7992.01 Hz  
 FLT 4000 Hz  
 DELAY 50.00 usec  
 ACQTM 2.0501 sec  
 PD 4.9500 sec  
 ADBIT 16  
 RGAIN 21  
 BF 0.10 Hz  
 T1 0.00  
 T2 0.00  
 T3 90.00  
 T4 100.00  
 EXMOD NON  
 EXPCM NON:Single.coupled:PW1\_ACQTM.  
 IRNUC 1H  
 IFR 399.65 MHz  
 IRSET 136.90 KHz  
 IRFIN 97.50 Hz  
 IRRPW 45 usec  
 IRATN 511  
 DFILE CF3-PhCO2Et+2diphenylacetyler  
 SF TH5ATFG2  
 LKSET 61.60 KHz  
 LKFIN 79.0 Hz  
 LKLEV 180  
 LGAIN 20  
 LKPHS 222  
 LKSIG 544  
 CSPED 12 Hz  
 FILDC  
 FILDF

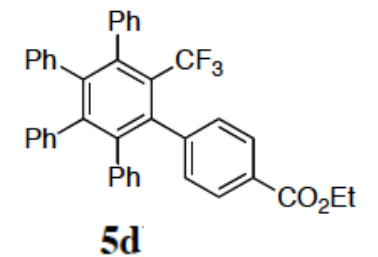

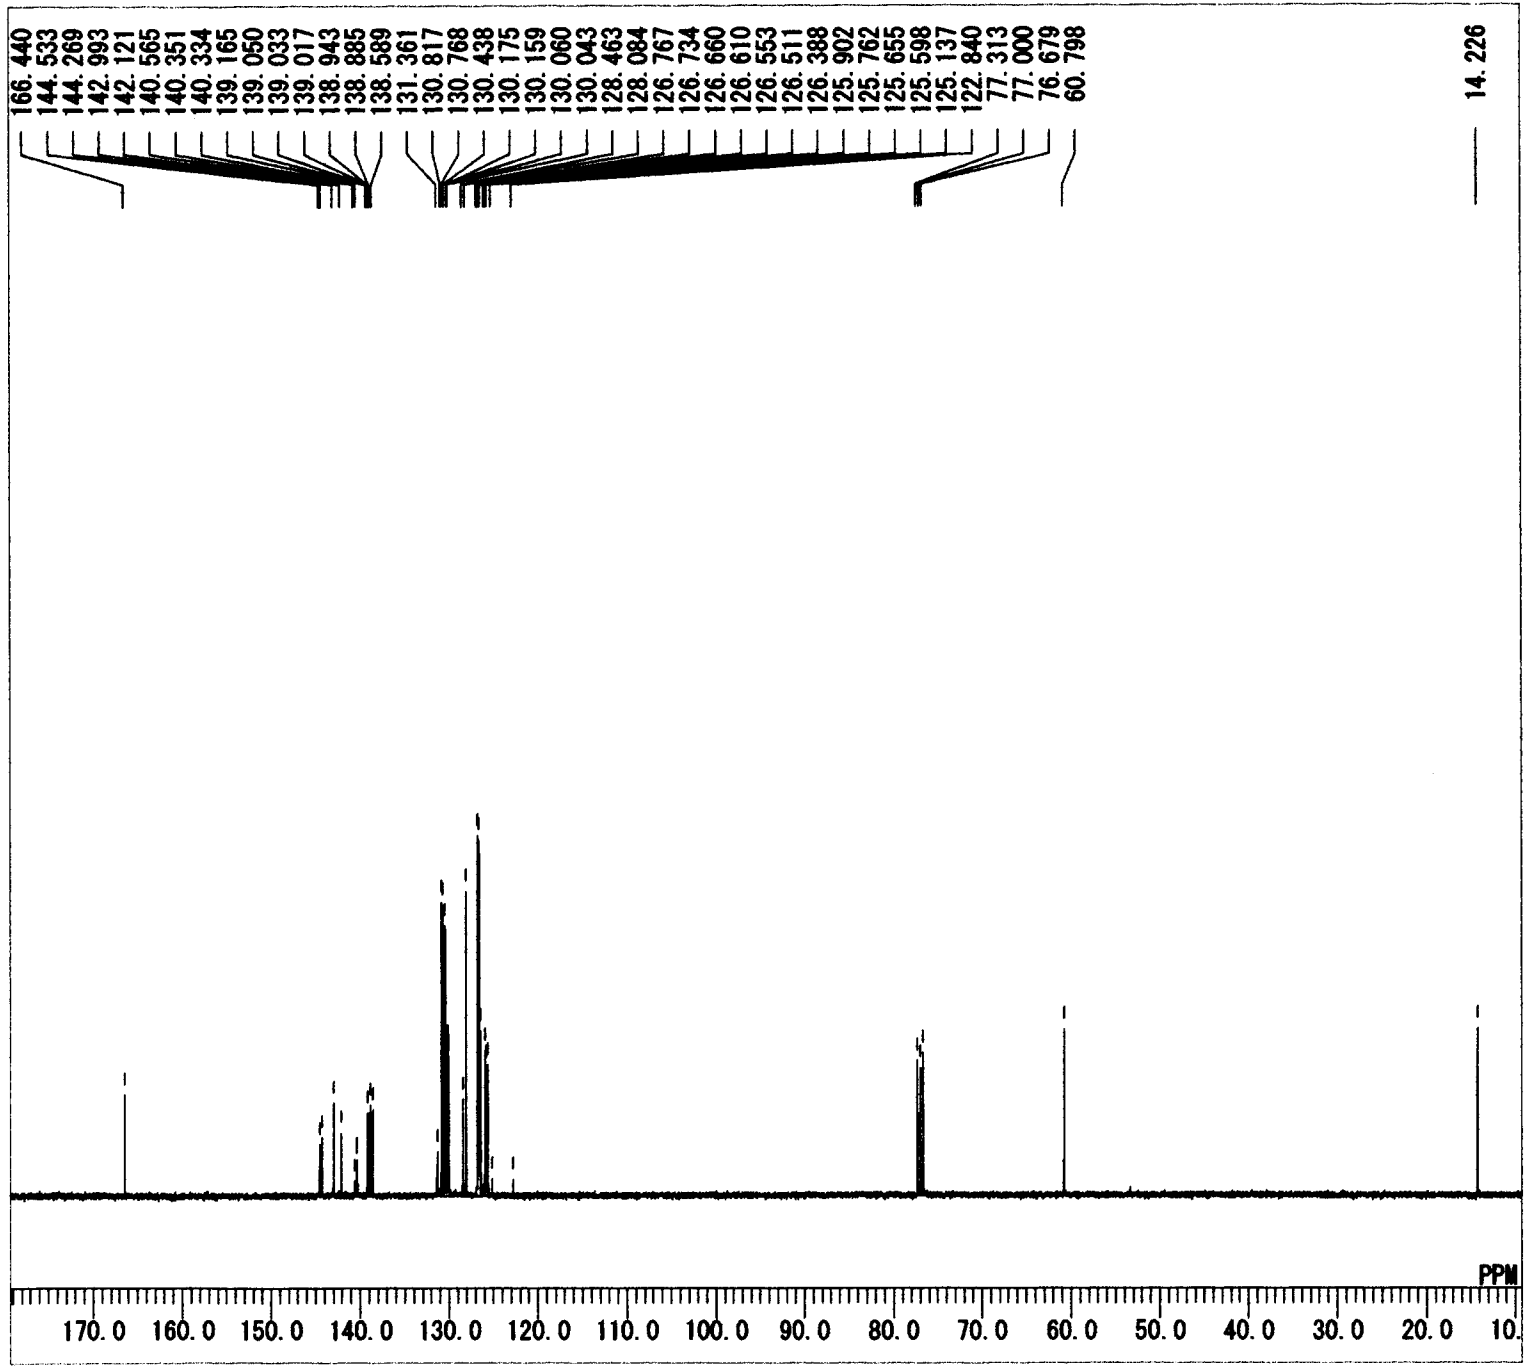

```

MENUF 13C
OBNUC 13C
OFR 100.40 MHz
OBSET 125.00 KHz
OBFIN 10500.00 Hz
PW1 6.00 usec
DEADT 19.10 usec
PREDL 0.20000 msec
IWT 1.0000 msec
POINT 32768
SPO 32768
TIMES 256
DUMMY 1
FREQU 27118.64 Hz
FLT 13550 Hz
DELAY 14.80 usec
ACQTM 1.2083 sec
PD 1.7920 sec
ADBIT 16
RGAIN 26
BF 0.60 Hz
T1 0.00
T2 0.00
T3 90.00
T4 100.00
EXMOD BCM
EXPCM Bilevel. complete. decoupling:
IRNUC 1H
IFR 399.65 MHz
IRSET 124.00 KHz
IRFIN 10500.00 Hz
IRRPW 45 usec
IRATN 511
DFILE CF3-PhCO2Et+2diphenylacetyler
SF TH5ATFG2
LKSET 61.60 KHz
LKFIN 79.0 Hz
LKLEV 180
LGAIN 24
LKPHS 222
LKSIG 1130
CSPED 11 Hz
FILDC
FILDF

```

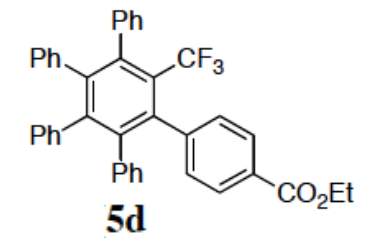

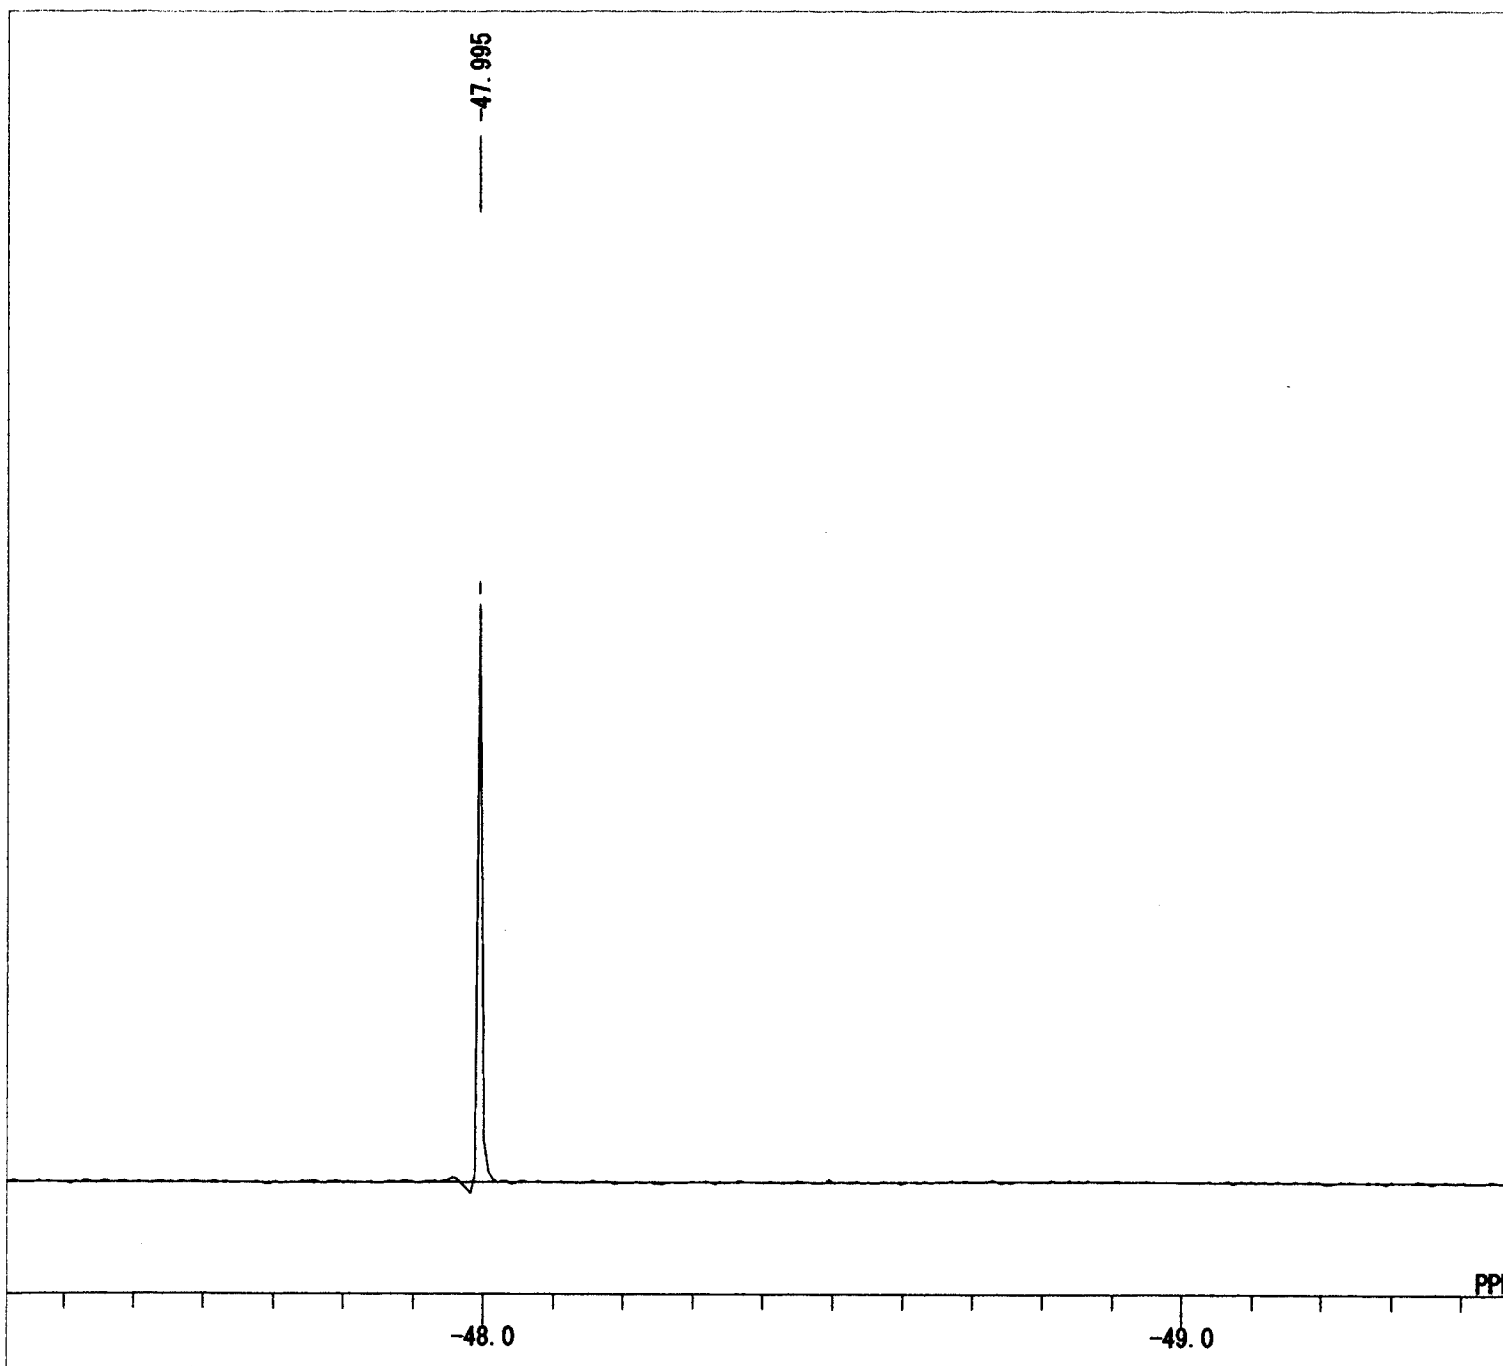

MENUF 19F  
 OBNUC 19F  
 OFR 376.05 MHz  
 OBSET 139.60 KHz  
 OBFIN 36.10 Hz  
 PW1 6.00 usec  
 DEADT 10.00 usec  
 PREDL 0.20000 msec  
 IWT 1.0000 msec  
 POINT 32768  
 SPO 32768  
 TIMES 16  
 DUMMY 1  
 FREQU 80000.00 Hz  
 FLT 40000 Hz  
 DELAY 5.00 usec  
 ACQTM 0.4096 sec  
 PD 4.9500 sec  
 ADBIT 16  
 RGAIN 14  
 BF 0.10 Hz  
 T1 0.00  
 T2 0.00  
 T3 90.00  
 T4 100.00  
 EXMOD NON  
 EXPCM NON:Single.coupled:PW1\_ACQTM  
 IRNUC 1H  
 IFR 399.65 MHz  
 IRSET 124.00 KHz  
 IRFIN 10500.00 Hz  
 IRRPW 45 usec  
 IRATN 511  
 DFILE CF3-PhCO2Et+2diphenylacetyl  
 SF TH5ATFG2  
 LKSET 61.60 KHz  
 LKFIN 79.0 Hz  
 LKLEV 180  
 LGAIN 20  
 LKPHS 222  
 LKSIG 551  
 CSPED 13 Hz  
 FILDC  
 FILDF

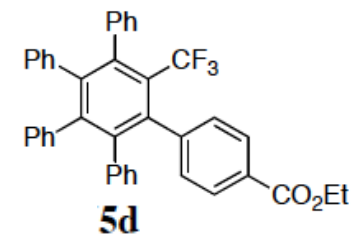

# <sup>19</sup>F NMR Analysis of the reaction mixture (Total yield for all CF<sub>3</sub>-containing compounds : 76%)

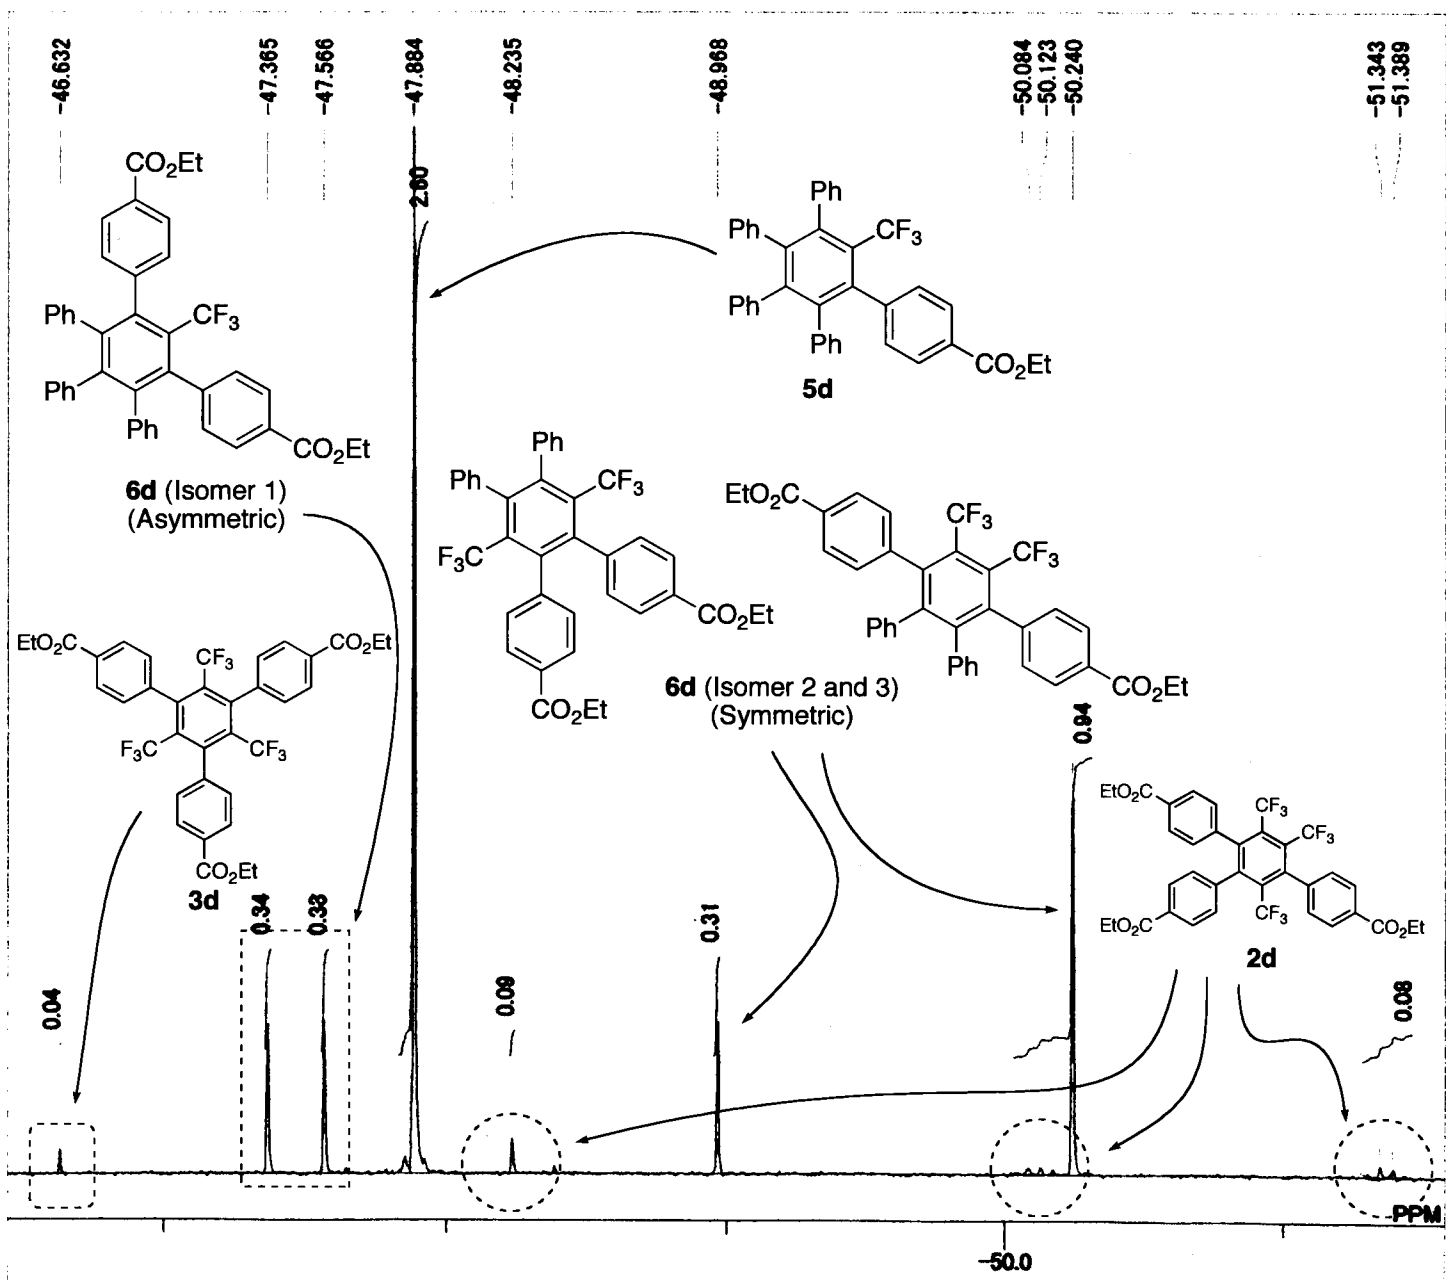

| Parameter | Value                            |
|-----------|----------------------------------|
| MENUF     | 19F                              |
| OBNUC     | 19F                              |
| OFR       | 376.05 MHz                       |
| OBSET     | 139.60 KHz                       |
| OBFIN     | 38.10 Hz                         |
| PW1       | 6.00 usec                        |
| DEADT     | 10.00 usec                       |
| PREDL     | 0.20000 msec                     |
| IWT       | 1.0000 msec                      |
| POINT     | 32768                            |
| SPO       | 32768                            |
| TIMES     | 16                               |
| DUMMY     | 1                                |
| FREQU     | 80000.00 Hz                      |
| FLT       | 40000 Hz                         |
| DELAY     | 5.00 usec                        |
| ACQTM     | 0.4096 sec                       |
| PD        | 4.9500 sec                       |
| ADBIT     | 16                               |
| RGAIN     | 14                               |
| BF        | 0.10 Hz                          |
| T1        | 0.00                             |
| T2        | 0.00                             |
| T3        | 90.00                            |
| T4        | 100.00                           |
| EXMOD     | NON                              |
| EXPCM     | NON:Single.coupled:PW1_ACQTM_PD: |
| IRNUC     | 1H                               |
| IFR       | 399.65 MHz                       |
| IRSET     | 124.00 KHz                       |
| IRFIN     | 10500.00 Hz                      |
| IRFPW     | 45 usec                          |
| IRATN     | 511                              |
| DFILE     | DEFAULT.ALS                      |
| SF        | TH5ATFG2                         |
| LKSET     | 61.60 KHz                        |
| LKFIN     | 79.0 Hz                          |
| LKLEV     | 180                              |
| LGAIN     | 23                               |
| LKPHS     | 222                              |
| LKSIG     | 926                              |
| CSPED     | 13 Hz                            |
| FILDC     |                                  |
| FILDF     |                                  |

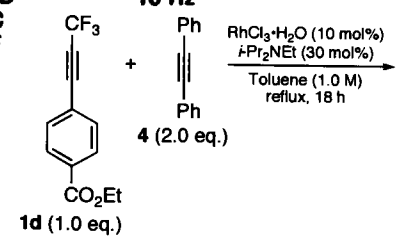

7.260  
7.147  
7.145  
7.133  
7.094  
7.082  
7.080  
7.072  
7.061  
7.057  
6.792  
6.778  
6.776  
6.764  
6.760  
6.757  
6.720  
6.717  
6.704  
6.681  
6.677  
6.664

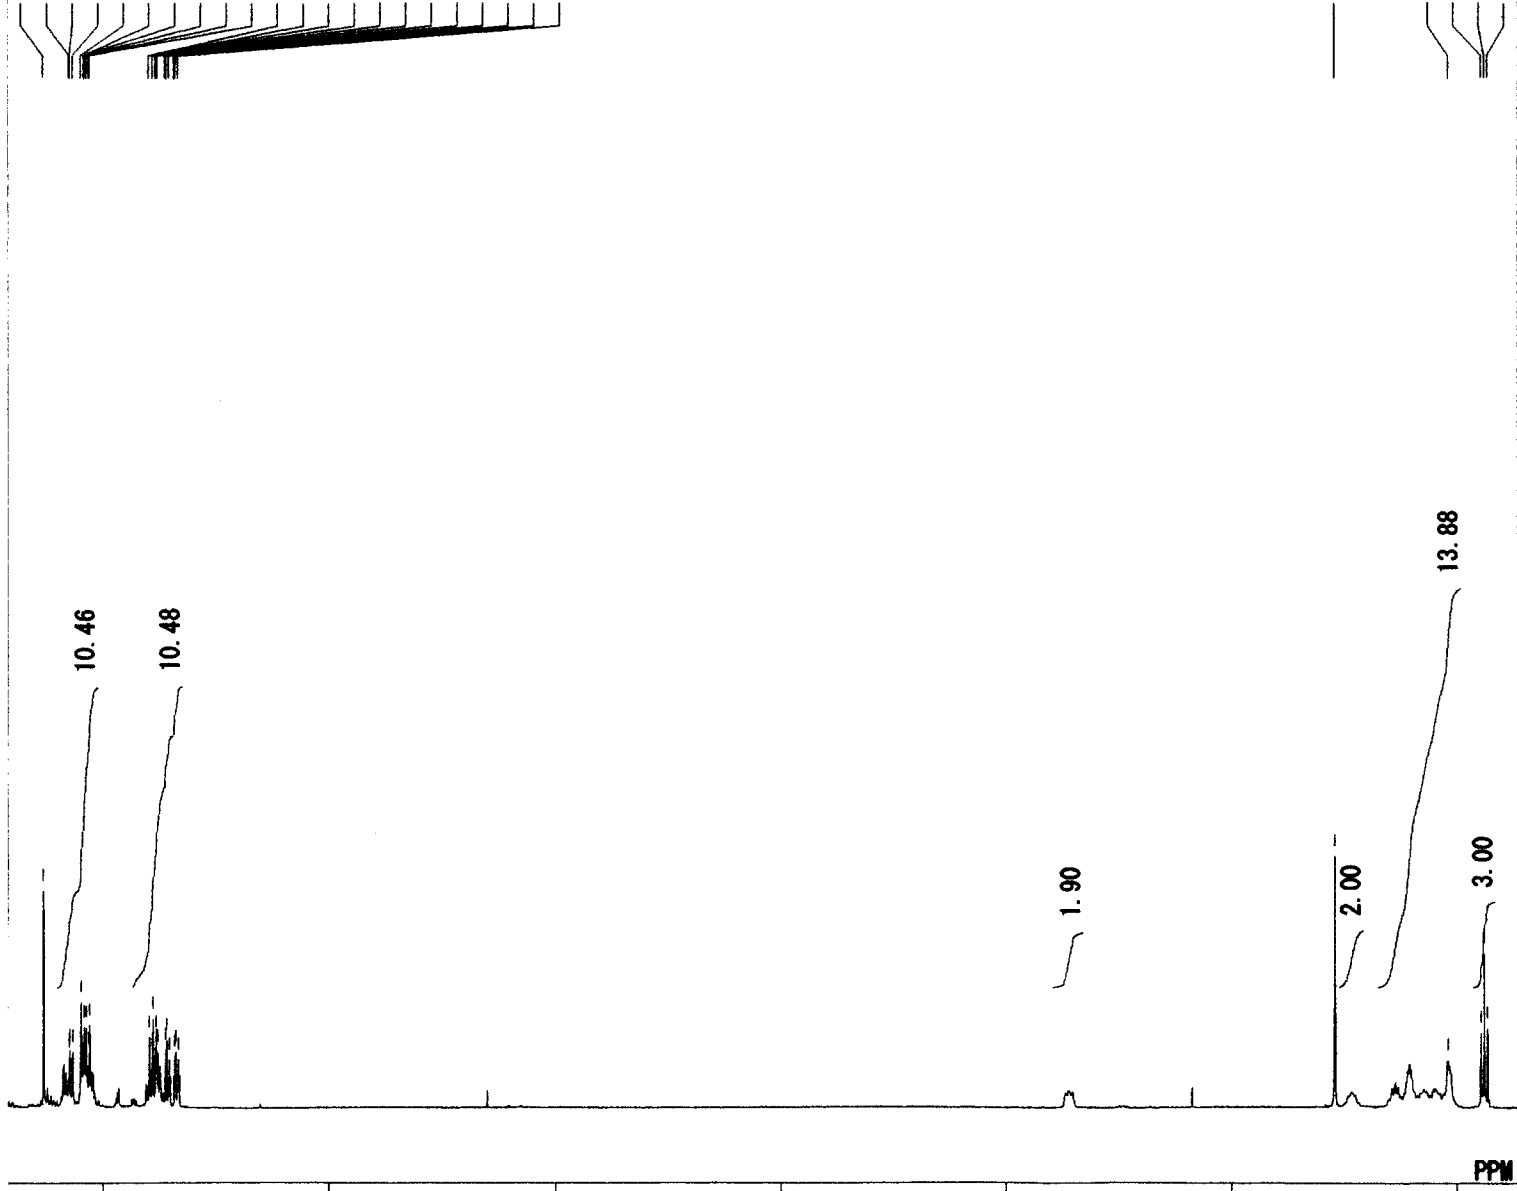

PPM

```

MENUF
OBNUC 1H
OFR 500.13 MHz
OBSET 3.08 KHz
OBF IN 8.51 Hz
PW1 10.00 usec
DEADT 6.00 usec
PREDL 1.00000 msec
IWT 1.0000 msec
POINT 32768
SPO 32768
TIMES 8
DUMMY 2
FREQU 10330.58 Hz
FLT 2000 Hz
DELAY 0.00 usec
ACQTM 0.0000 sec
PD 0.0000 sec
ADBIT 16
RGAIN 322
BF 0.10 Hz
T1 0.00
T2 0.00
T3 90.00
T4 100.00
EXMOD zg30
EXPCM
IRNUC
IFR 0.00 MHz
IRSET 0.00 KHz
IRFIN 0.00 Hz
IRRPW 0 usec
IRATN 0
DFILE CF3-C10H21-diPh(1H).als
SF
LKSET 0.00 KHz
LKFIN 0.0 Hz
LKLEV 0
LGA IN 0
LKPHS 0
LKSIG 0
CSPED 0 Hz
FILDC
FILDF
  
```

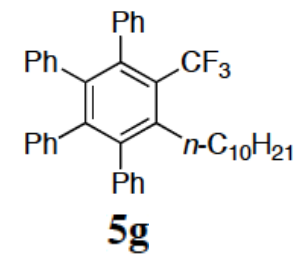

143.060  
140.677  
139.824  
139.548  
139.314  
131.502  
131.007  
130.555  
130.424  
130.016  
129.877  
129.863  
127.509  
127.283  
126.693  
126.474  
126.408  
126.387  
126.131  
125.446  
125.315

77.255  
77.000  
76.745

31.891  
29.924  
29.494  
29.311  
29.275  
28.765  
22.673

14.103

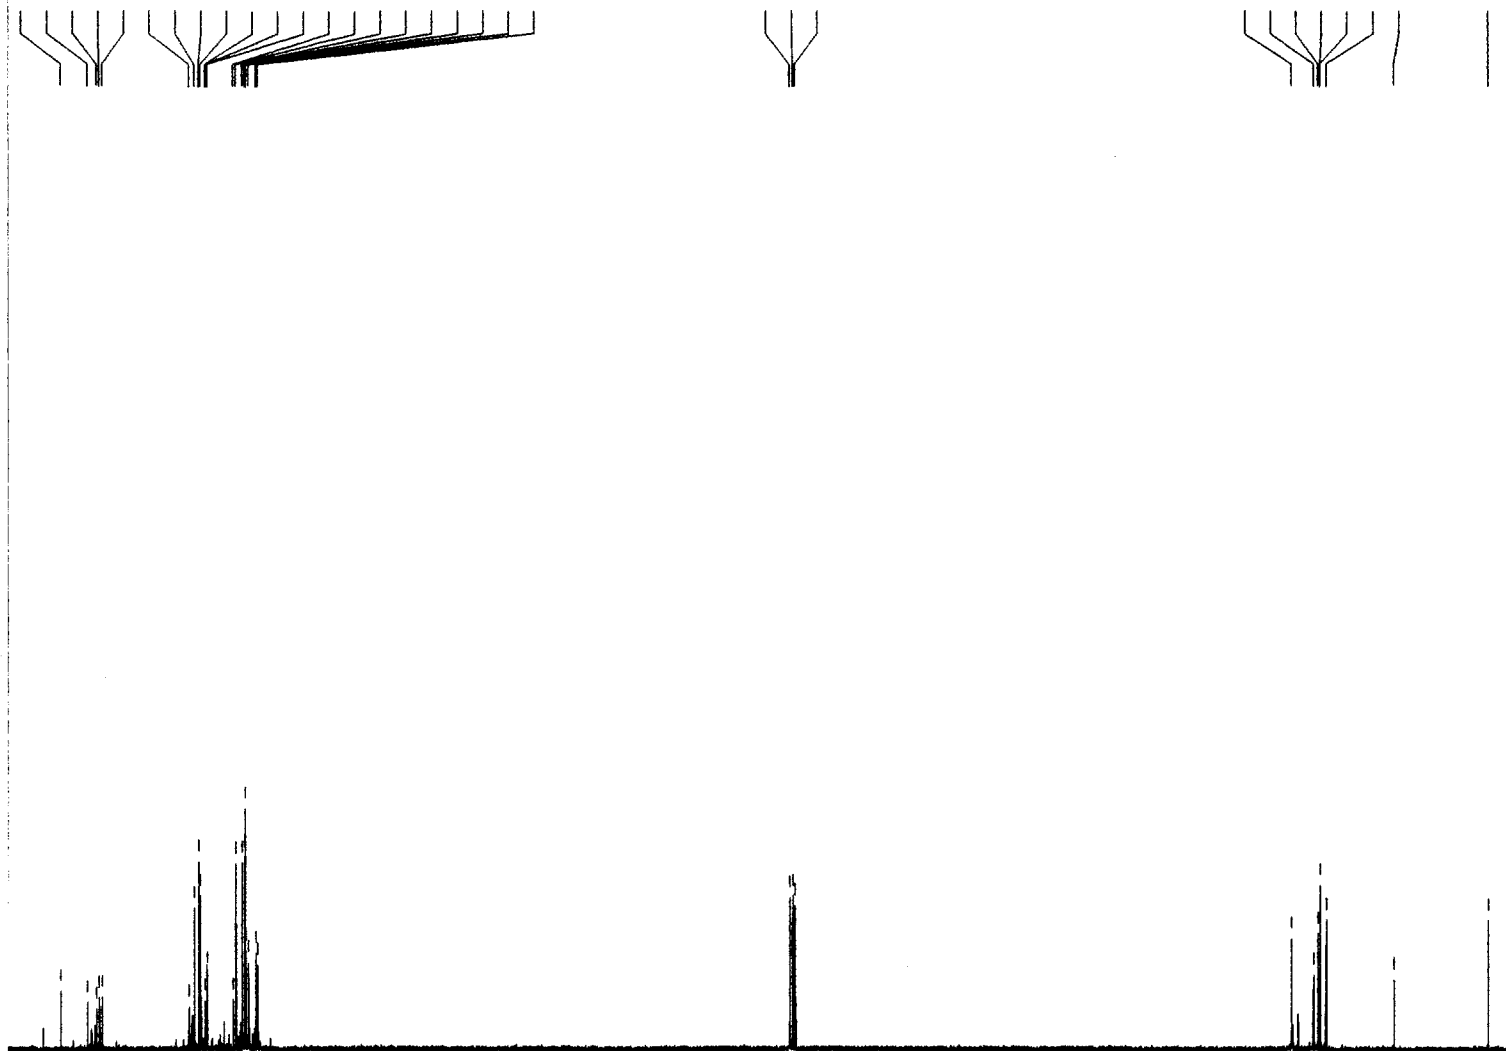

```

MENUF
OBNUC 13C
OFR 125.77 MHz
OBSET 0.36 KHz
OBF IN 4.30 Hz
PW1 10.00 usec
DEADT 6.00 usec
PREDL 1.0000 msec
IWT 1.0000 msec
POINT 32768
SPO 32768
TIMES 8
DUMMY 2
FREQU 30030.03 Hz
FLT 2000 Hz
DELAY 0.00 usec
ACQTM 0.0000 sec
PD 0.0000 sec
ADBIT 16
RGAIN 3649
BF 0.10 Hz
T1 0.00
T2 0.00
T3 90.00
T4 100.00
EXMOD zpg30
EXPCM
IRNUC
IFR 0.00 MHz
IRSET 0.00 KHz
IRF IN 0.00 Hz
IRRPW 0 usec
IRATN 0
DFILE CF3-C10H21-diPh(13C).als
SF
LKSET 0.00 KHz
LKF IN 0.0 Hz
LKLEV 0
LGA IN 0
LKPHS 0
LKSIG 0
CSPED 0 Hz
FILDC
FILDF
  
```

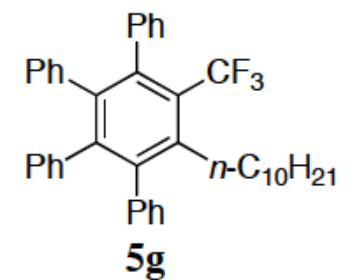

140.0 130.0 120.0 110.0 100.0 90.0 80.0 70.0 60.0 50.0 40.0 30.0 20.0 PPM

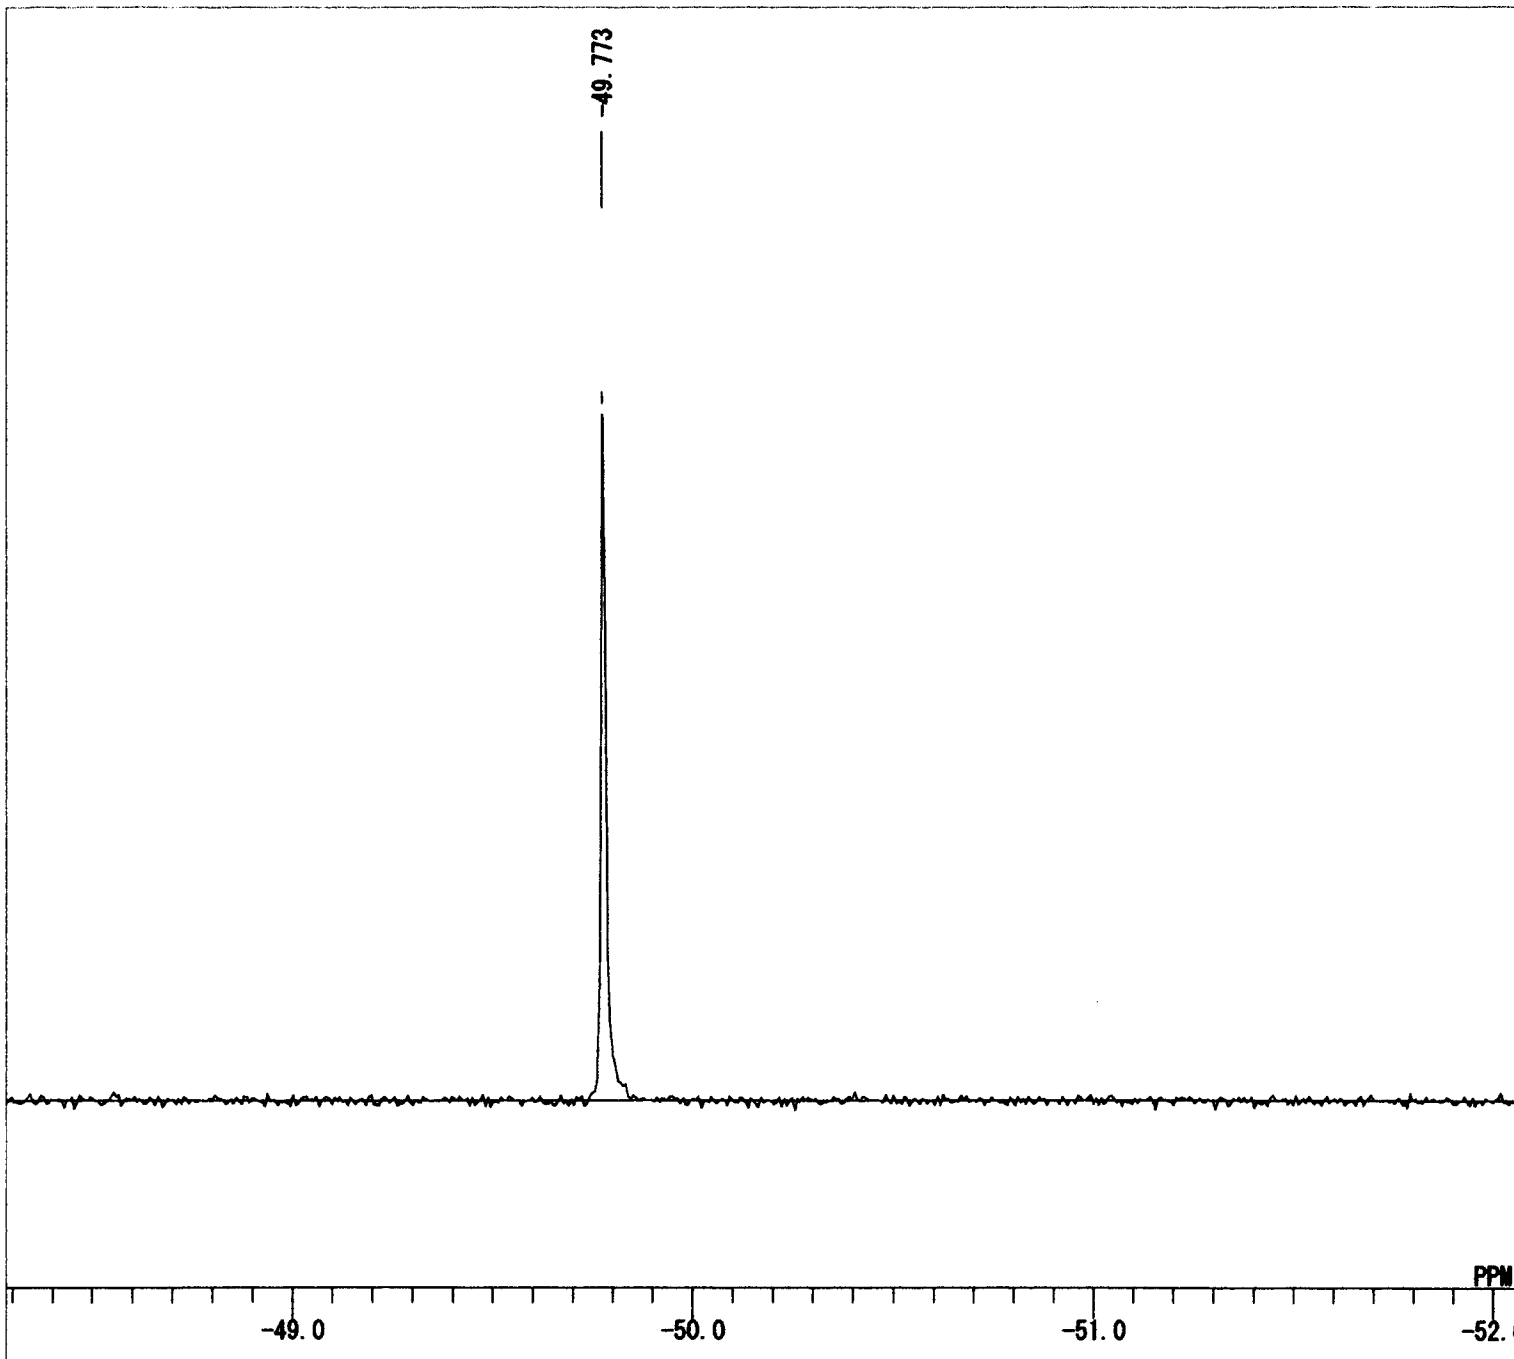

```

MENUF 19F
OBNUC 19F
OFR      376.05 MHz
OBSET    139.60 KHz
OBFIN    36.10 Hz
PW1      6.00 usec
DEADT    10.00 usec
PREDL    0.20000 msec
IWT      1.0000 msec
POINT    32768
SPO      32768
TIMES    16
DUMMY    1
FREQU    80000.00 Hz
FLT      40000 Hz
DELAY    5.00 usec
ACQTM    0.4096 sec
PD       4.9500 sec
ADBIT    16
RGAIN    15
BF       0.00 Hz
T1       0.00
T2       0.00
T3       90.00
T4       100.00
EXMOD    NON
EXPCM    NON:Single.coupled:PW1_ACQTM
IRNUC    1H
IFR      399.65 MHz
IRSET    124.00 KHz
IRFIN    10500.00 Hz
IRRPW    45 usec
IRATN    511
DFILE    CF3-C10H21+2diphenylacetylene
SF       TH5ATFG2
LKSET    61.60 KHz
LKFIN    79.0 Hz
LKLEV    180
LGAIN    22
LKPHS    212
LKSIG    671
CSPED    11 Hz
FILDC
FILDF
  
```

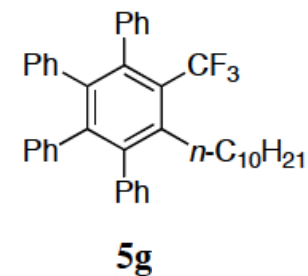

# <sup>19</sup>F NMR Analysis of the reaction mixture (Total yield for all CF<sub>3</sub>-containing compounds : 73%)

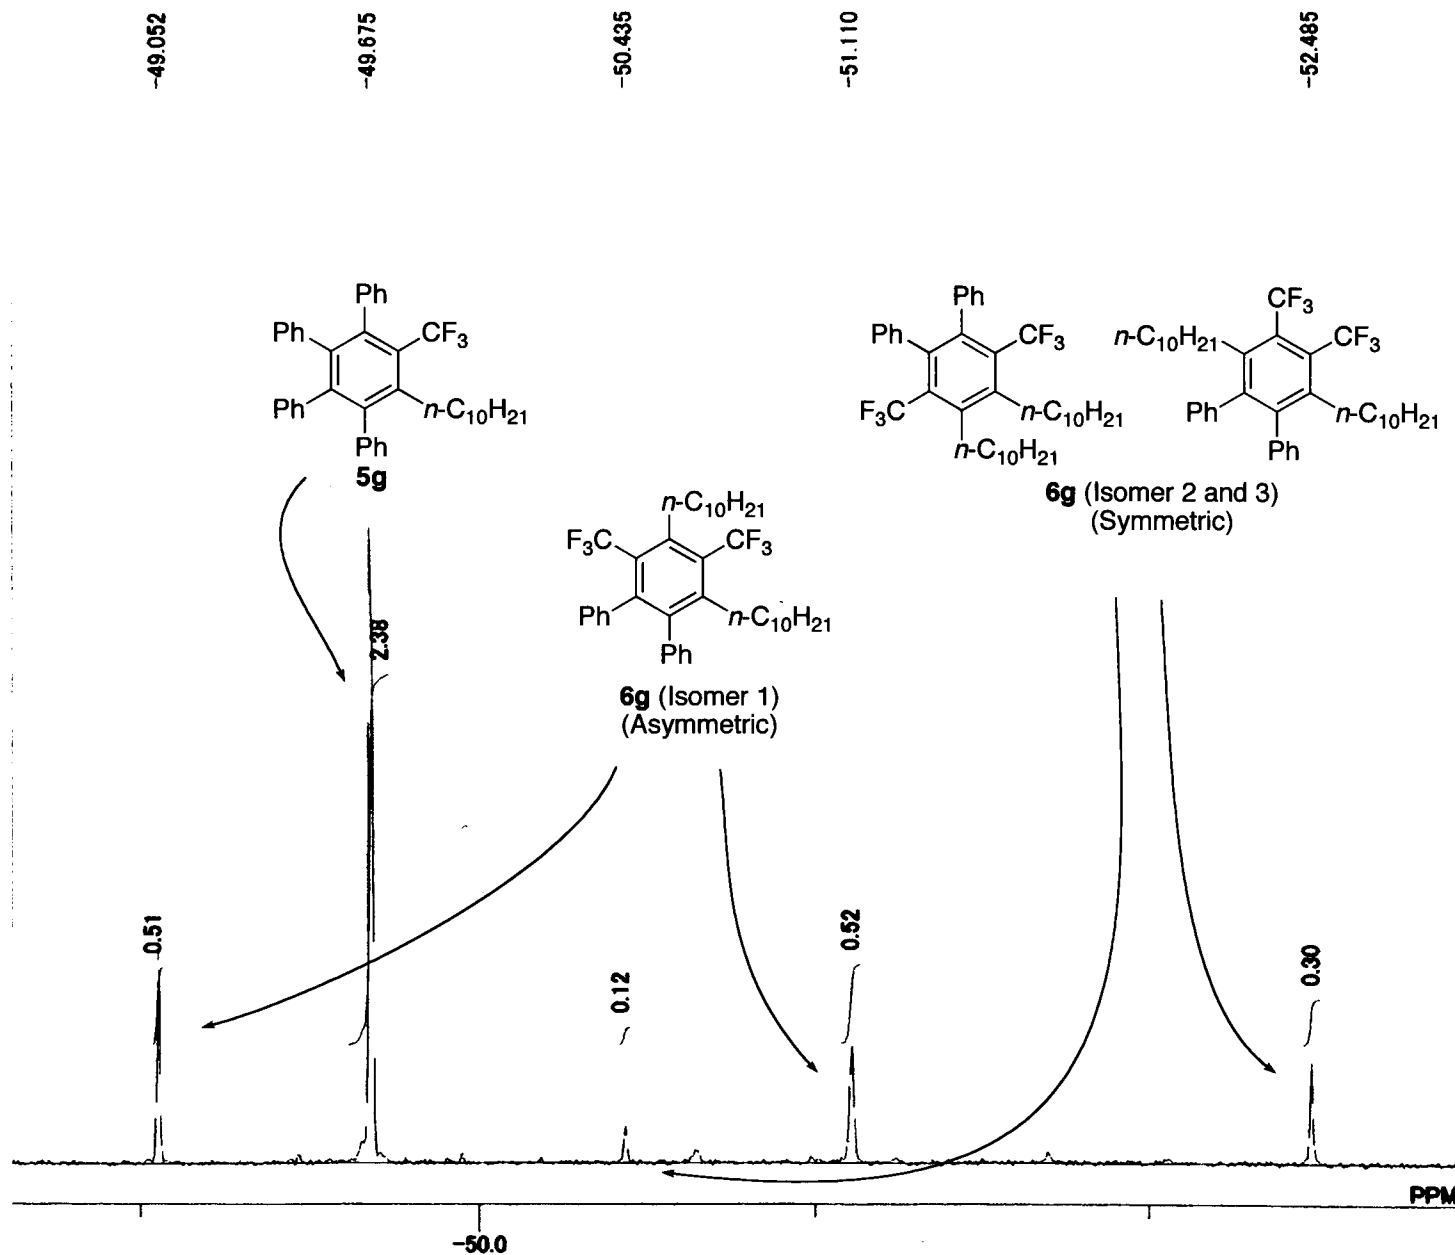

|       |                                  |
|-------|----------------------------------|
| MENUF | 19F                              |
| OBNUC | 19F                              |
| OFR   | 376.05 MHz                       |
| OBSET | 139.60 KHz                       |
| OBFIN | 36.10 Hz                         |
| PW1   | 6.00 usec                        |
| DEADT | 10.00 usec                       |
| PREDL | 0.20000 msec                     |
| IWT   | 1.0000 msec                      |
| POINT | 32768                            |
| SPO   | 32768                            |
| TIMES | 16                               |
| DUMMY | 1                                |
| FREQU | 80000.00 Hz                      |
| FLT   | 40000 Hz                         |
| DELAY | 5.00 usec                        |
| ACQTM | 0.4098 sec                       |
| PD    | 4.9500 sec                       |
| ADBIT | 16                               |
| RGAIN | 15                               |
| BF    | 0.00 Hz                          |
| T1    | 0.00                             |
| T2    | 0.00                             |
| T3    | 90.00                            |
| T4    | 100.00                           |
| EXMOD | NON                              |
| EXPCM | NON:Single.coupled:PW1_ACQTM_PD: |
| IRNUC | 1H                               |
| IFR   | 399.65 MHz                       |
| IRSET | 124.00 KHz                       |
| IRFIN | 10500.00 Hz                      |
| IRRPW | 45 usec                          |
| IRATN | 511                              |
| DFILE | DEFAULT.ALS                      |
| SF    | TH5ATFG2                         |
| LKSET | 61.60 KHz                        |
| LKFIN | 79.0 Hz                          |
| LKLEV | 180                              |
| LGAIN | 22                               |
| LKPHS | 212                              |
| LKSIG | 668                              |
| CSPED | 11 Hz                            |
| FILDC |                                  |
| FILDF |                                  |

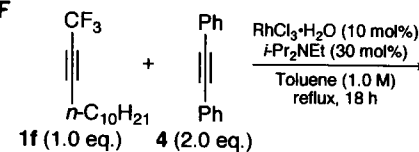



7.260  
7.131  
7.126  
7.115  
7.110  
7.104  
7.098  
7.098  
7.048  
7.042  
7.033  
6.850  
6.835  
6.822  
6.817  
6.810  
6.804  
6.795  
6.569  
6.565  
6.560  
6.545  
6.540

3.955  
3.936  
3.929  
3.918  
3.911  
3.894  
3.607  
3.590  
3.585  
3.568  
3.564  
3.559  
3.542

1.584  
1.182  
1.165  
1.147

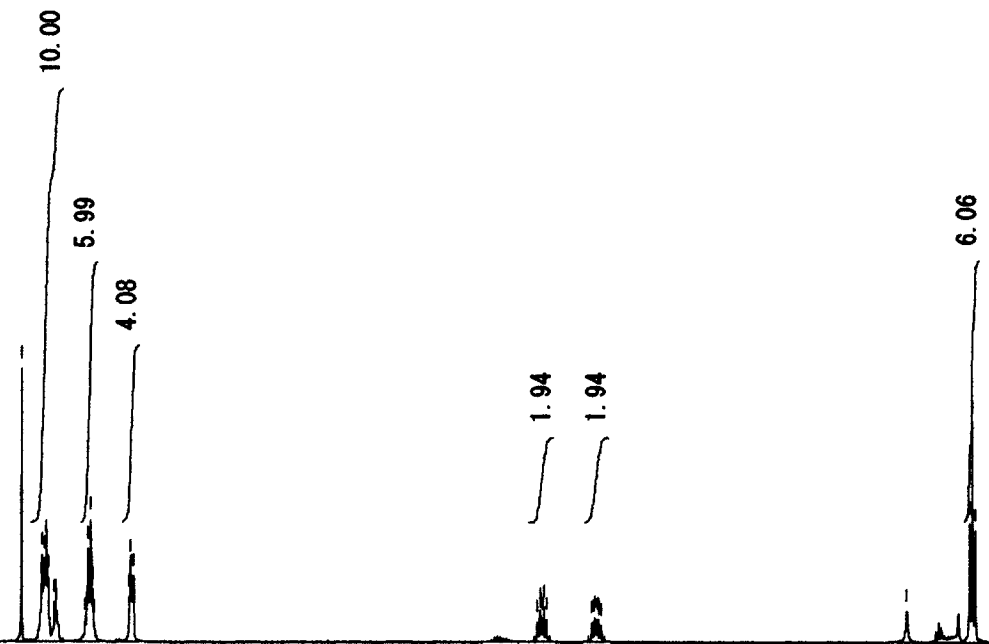

MENUF 1H  
OBNUC 1H  
OFR 399.65 MHz  
OBSET 135.40 KHz  
OBFIN 24.90 Hz  
PW1 5.80 usec  
DEADT 72.10 usec  
PREDL 0.20000 msec  
IWT 1.0000 msec  
POINT 16384  
SPO 16384  
TIMES 8  
DUMMY 1  
FREQU 7992.01 Hz  
FLT 4000 Hz  
DELAY 50.00 usec  
ACQTM 2.0501 sec  
PD 4.9500 sec  
ADBIT 16  
RGAIN 18  
BF 0.00 Hz  
T1 0.00  
T2 0.00  
T3 90.00  
T4 100.00  
EXMOD NON  
EXPCM NON:Single.coupled:PW1\_ACQTM.  
IRNUC 1H  
IFR 399.65 MHz  
IRSET 136.90 KHz  
IRFIN 97.50 Hz  
IRRPW 45 usec  
IRATN 511  
DFILE CF3-P(0)(OEt)2+2diphenylacet;  
SF TH5ATFG2  
LKSET 61.60 KHz  
LKFIN 79.0 Hz  
LKLEV 180  
LGAIN 22  
LKPHS 231  
LKSIG 739  
CSPED 12 Hz  
FILDC  
FILDF

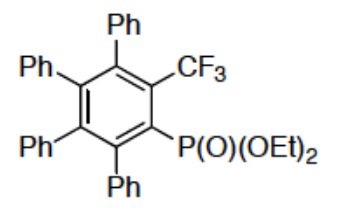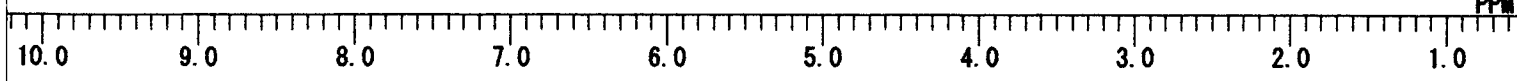

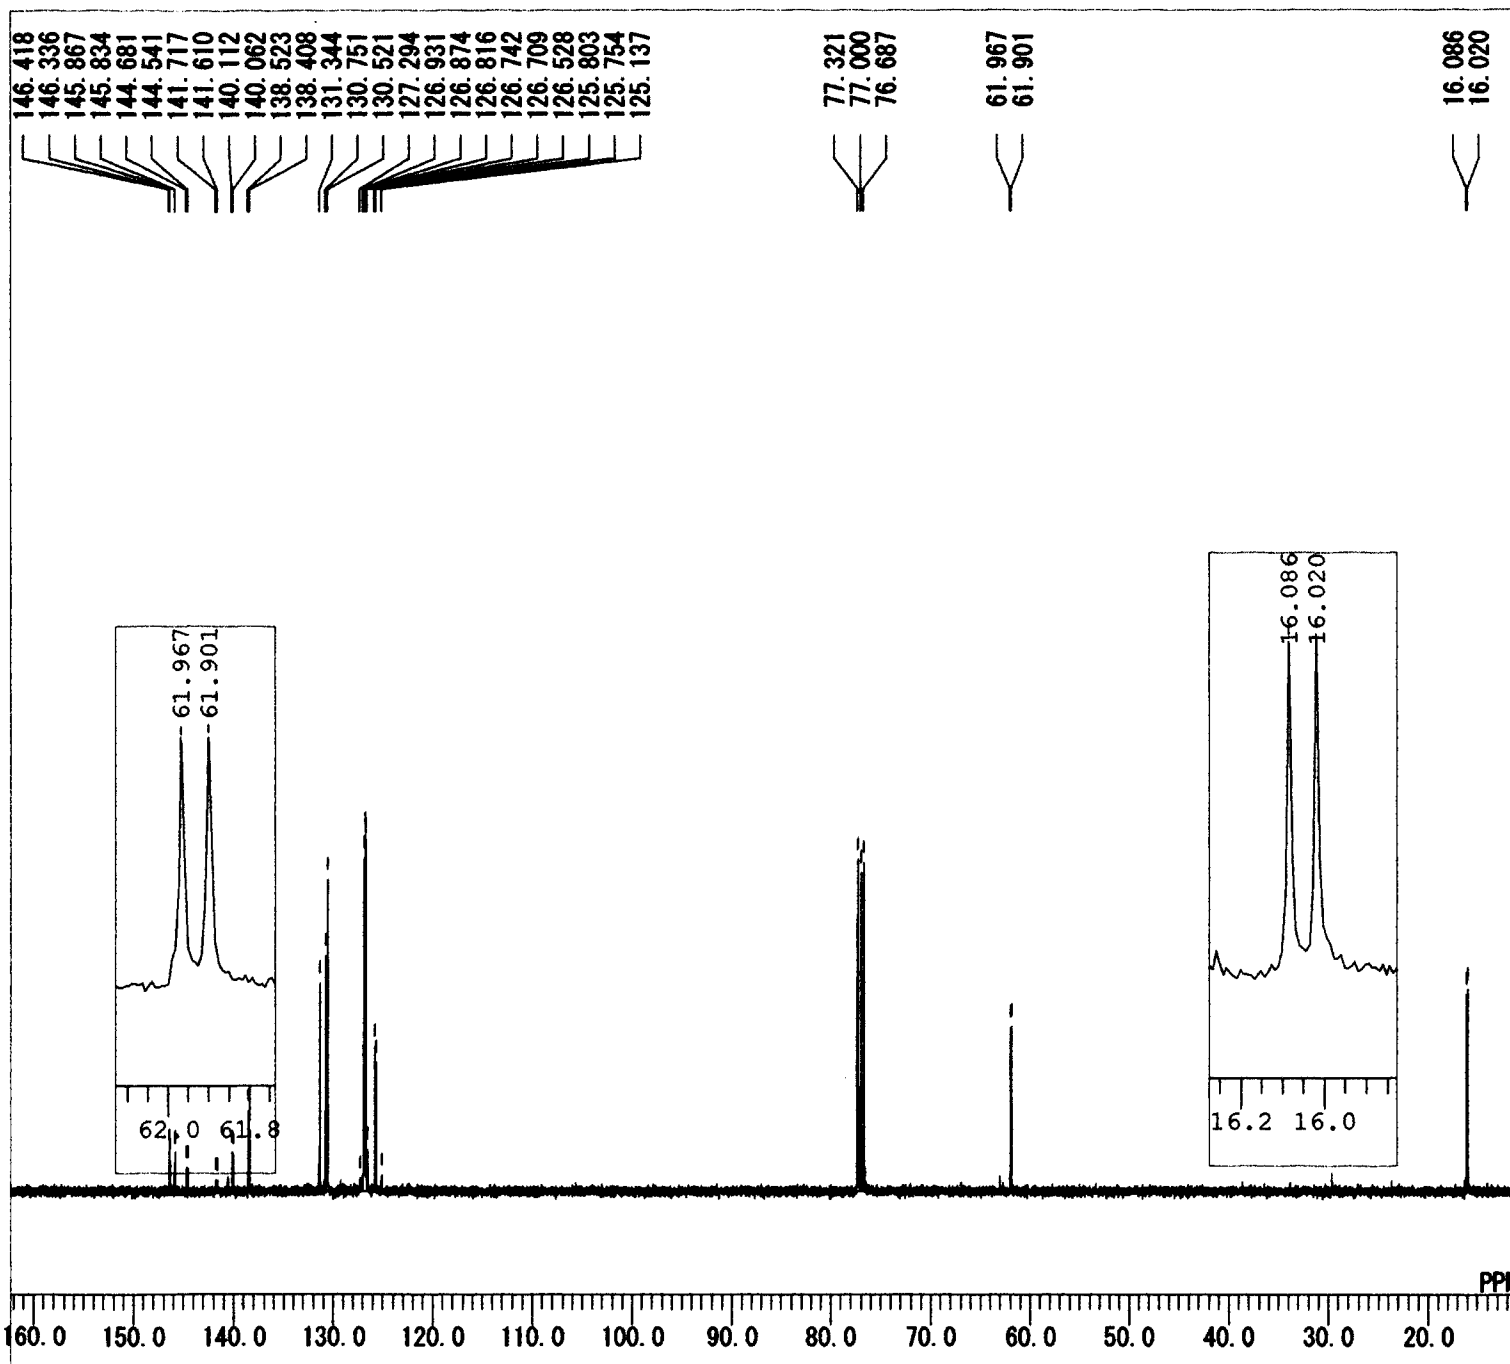

```

MENUF 13C
OBNUC 13C
OFR 100.40 MHz
OBSET 125.00 KHz
OBFIN 10500.00 Hz
PW1 6.00 usec
DEADT 19.10 usec
PREDL 0.20000 msec
IWT 1.0000 msec
POINT 32768
SPO 32768
TIMES 1024
DUMMY 1
FREQU 27118.64 Hz
FLT 13550 Hz
DELAY 14.80 usec
ACQTM 1.2083 sec
PD 1.7920 sec
ADBIT 16
RGAIN 26
BF 0.10 Hz
T1 0.00
T2 0.00
T3 90.00
T4 100.00
EXMOD BCM
EXPCM Bilevel, complete decoupling:
IRNUC 1H
IFR 399.65 MHz
IRSET 124.00 KHz
IRFIN 10500.00 Hz
IRRPW 45 usec
IRATN 511
DFILE CF3-P(O)(OEt)2+2diphenylacet
SF TH5ATFG2
LKSET 61.60 KHz
LKFIN 79.0 Hz
LKLEV 180
LGAIN 25
LKPHS 231
LKSIG 1153
CSPED 13 Hz
FILDC
FILDF
  
```

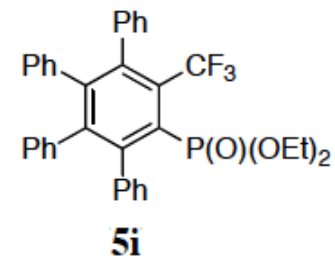

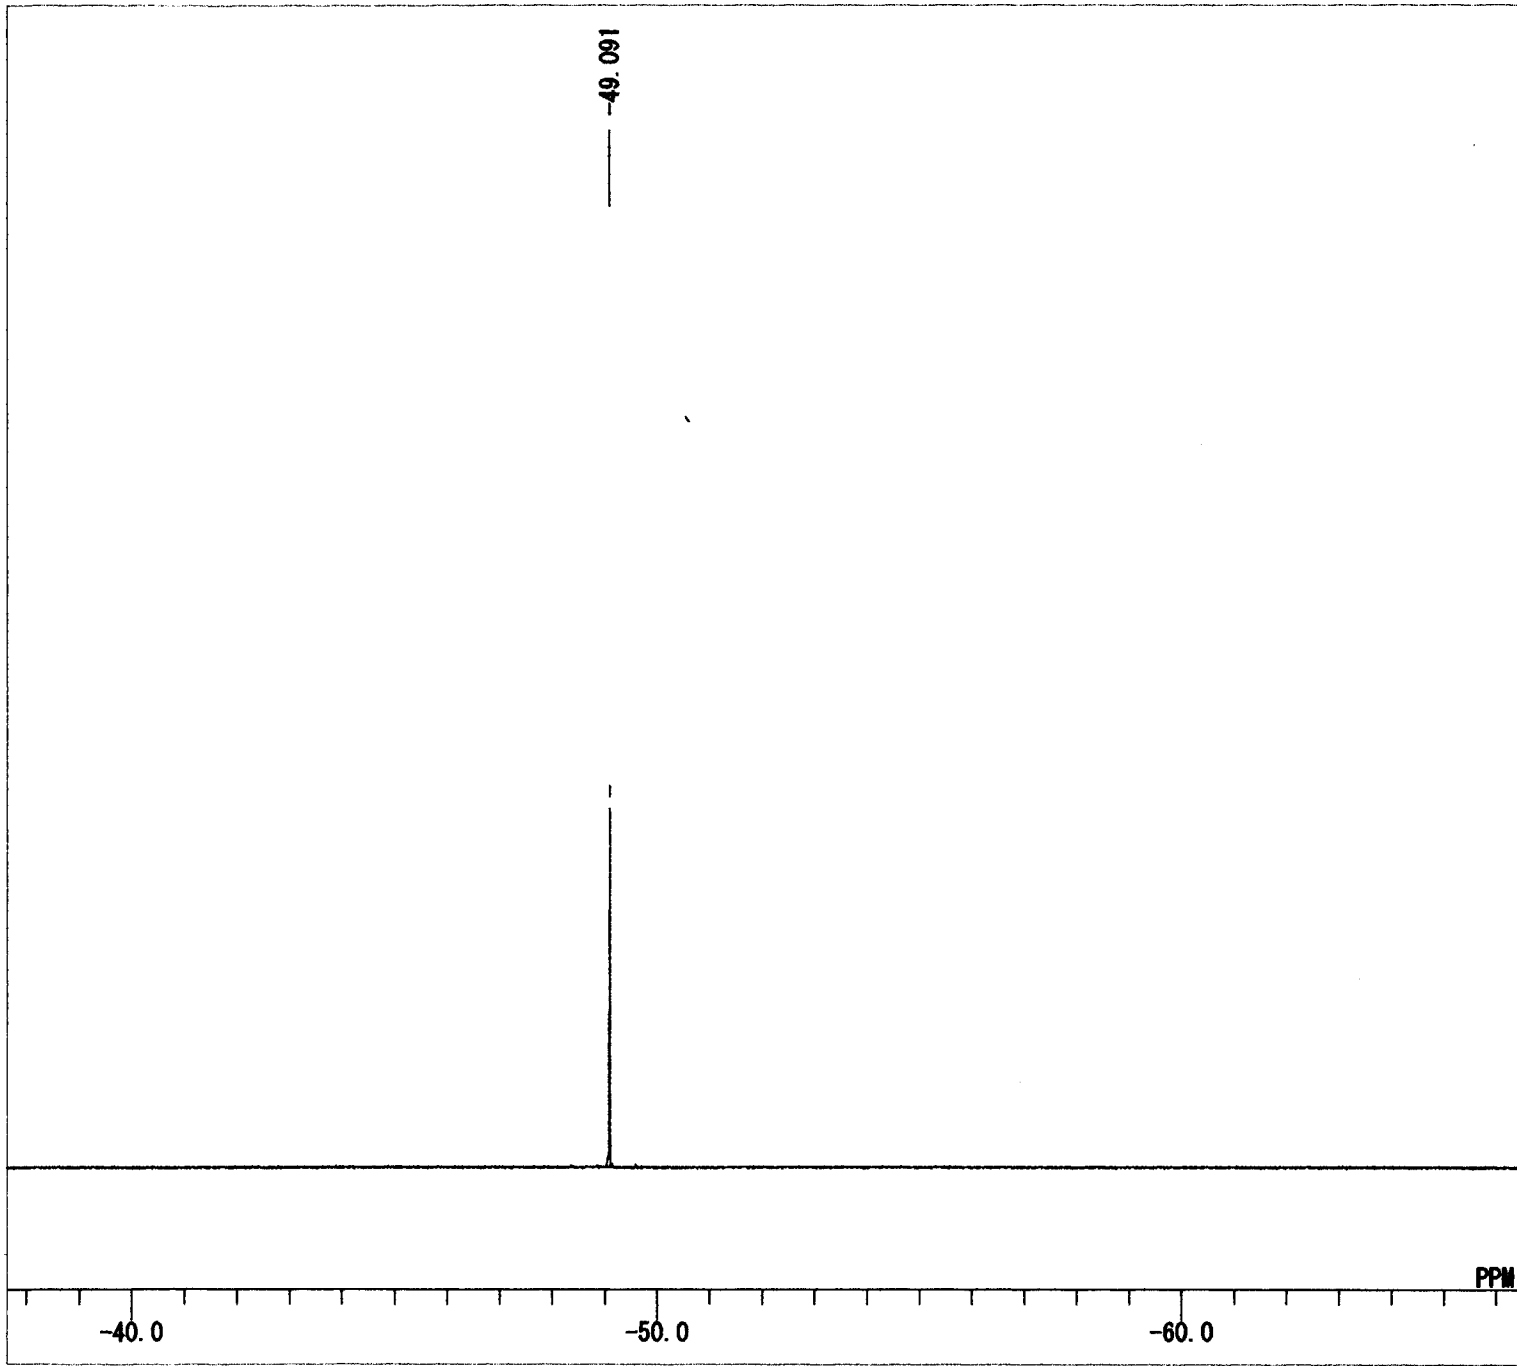

```

MNUF 19F
OBNUC 19F
OFR 376.05 MHz
OBSET 139.60 KHz
OBFIN 36.10 Hz
PW1 6.00 usec
DEADT 10.00 usec
PREDL 0.20000 msec
IWT 1.0000 msec
POINT 32768
SPO 32768
TIMES 16
DUMMY 1
FREQ 80000.00 Hz
FLT 40000 Hz
DELAY 5.00 usec
ACQTM 0.4096 sec
PD 4.9500 sec
ADBIT 16
RGAIN 14
BF 0.10 Hz
T1 0.00
T2 0.00
T3 90.00
T4 100.00
EXMOD NON
EXPCM NON:Single.coupled:PW1_ACQTM
IRNUC 1H
IFR 399.65 MHz
IRSET 124.00 KHz
IRFIN 10500.00 Hz
IRRPW 45 usec
IRATN 511
DFILE CF3-P(0)(OEt)2+2diphenylacet;
SF TH5ATFG2
LKSET 61.60 KHz
LKFIN 79.0 Hz
LKLEV 180
LGA IN 24
LKPHS 231
LKSIG 1510
CSPED 14 Hz
FILDC
FILDF

```

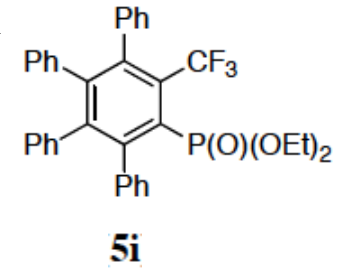

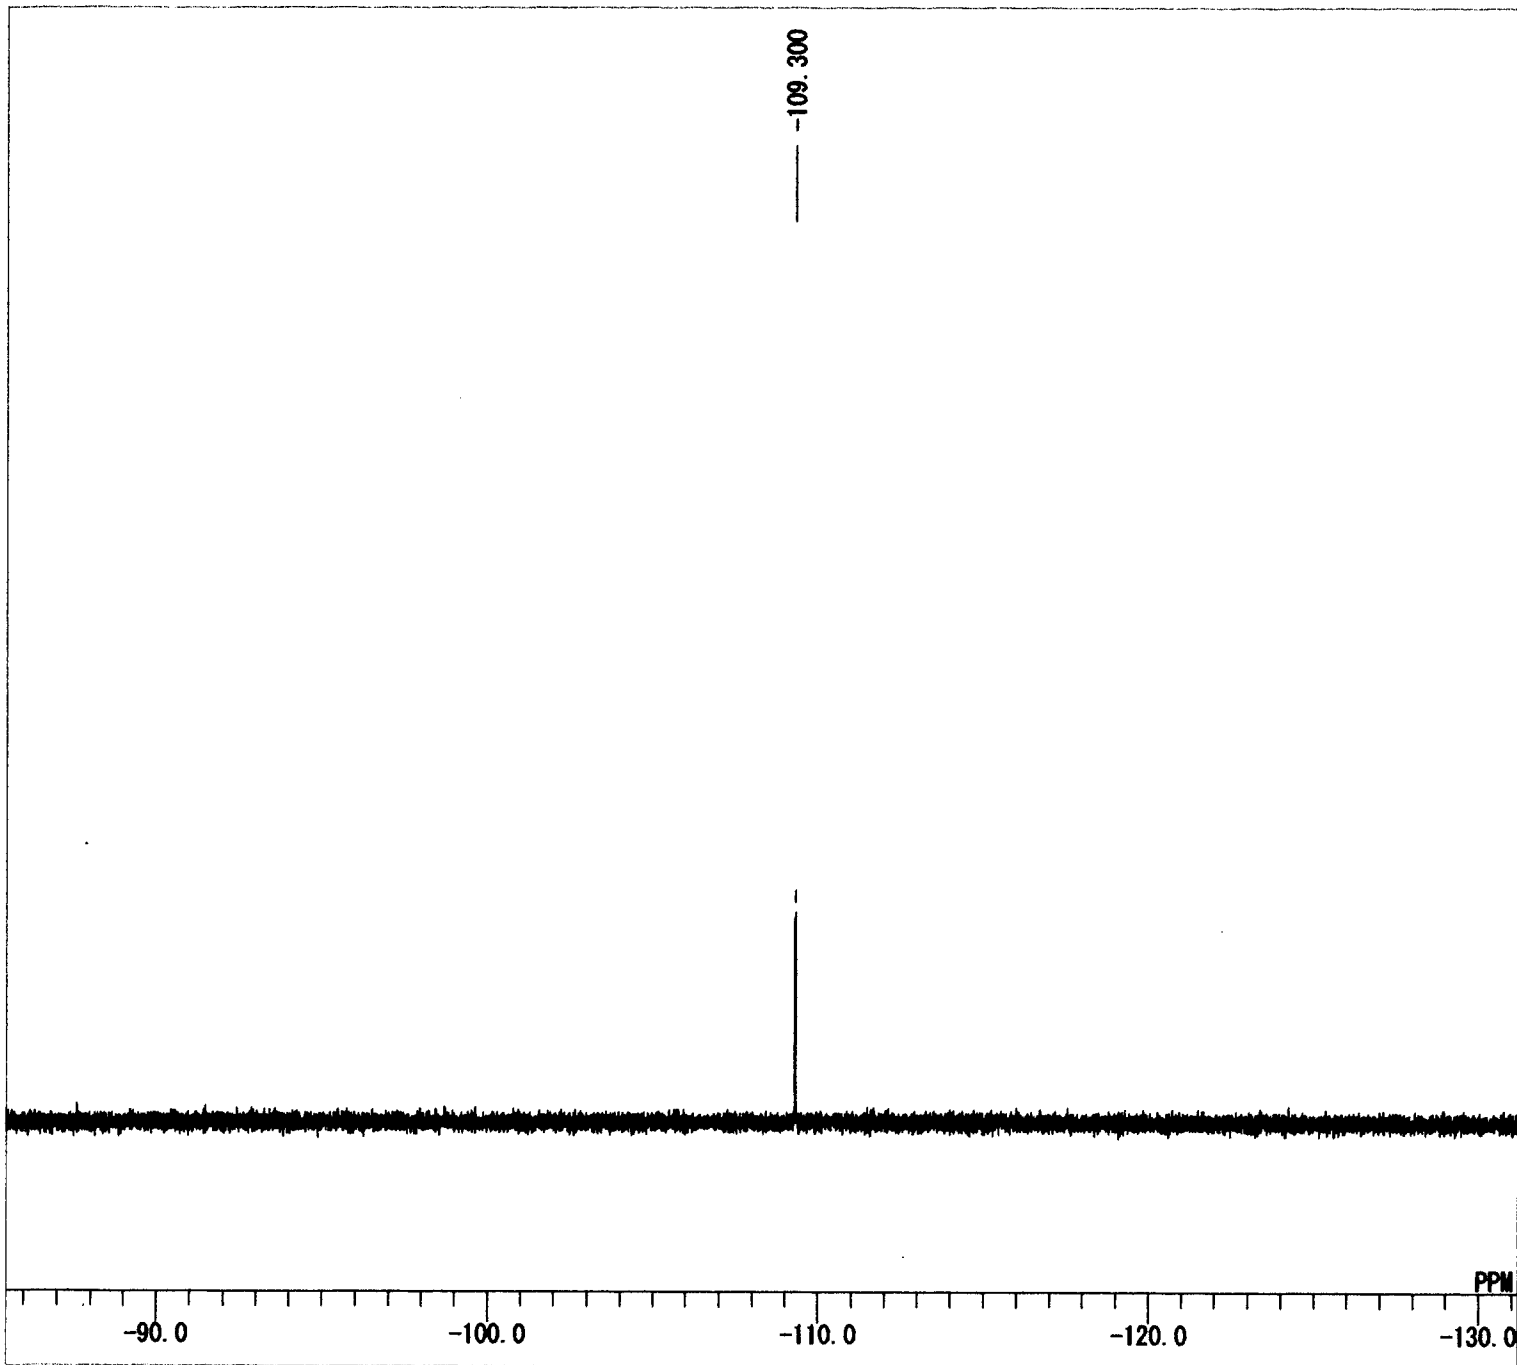

```

MENUF 31P
OBNUC 31P
OFR      161.70 MHz
OBSET    144.10 KHz
OBFIN    70.00 Hz
PW1      5.70 usec
DEADT    15.70 usec
PREDL    0.20000 msec
IWT      1.0000 msec
POINT    65536
SPO      65536
TIMES    32
DUMMY    1
FREQU    32258.06 Hz
FLT      16150 Hz
DELAY    12.40 usec
ACQTM    2.0316 sec
PD        1.7920 sec
ADBIT    16
RGAIN    25
BF        0.00 Hz
T1        0.00
T2        0.00
T3        90.00
T4       100.00
EXMOD    BCM
EXPCM    Bilevel. complete. decoupling:
IRNUC    1H
IFR      399.65 MHz
IRSET    124.00 KHz
IRFIN    10500.00 Hz
IRRPW    45 usec
IRATN    511
DFILE    CF3-P(0)(OEt)2+2diphenylacet;
SF        TH5ATFG2
LKSET    61.60 KHz
LKFIN    79.0 Hz
LKLEV    180
LGAIN    22
LKPHS    231
LKSIG    723
CSPED    12 Hz
FILDC
FILDF

```

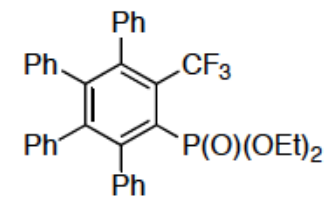

Si

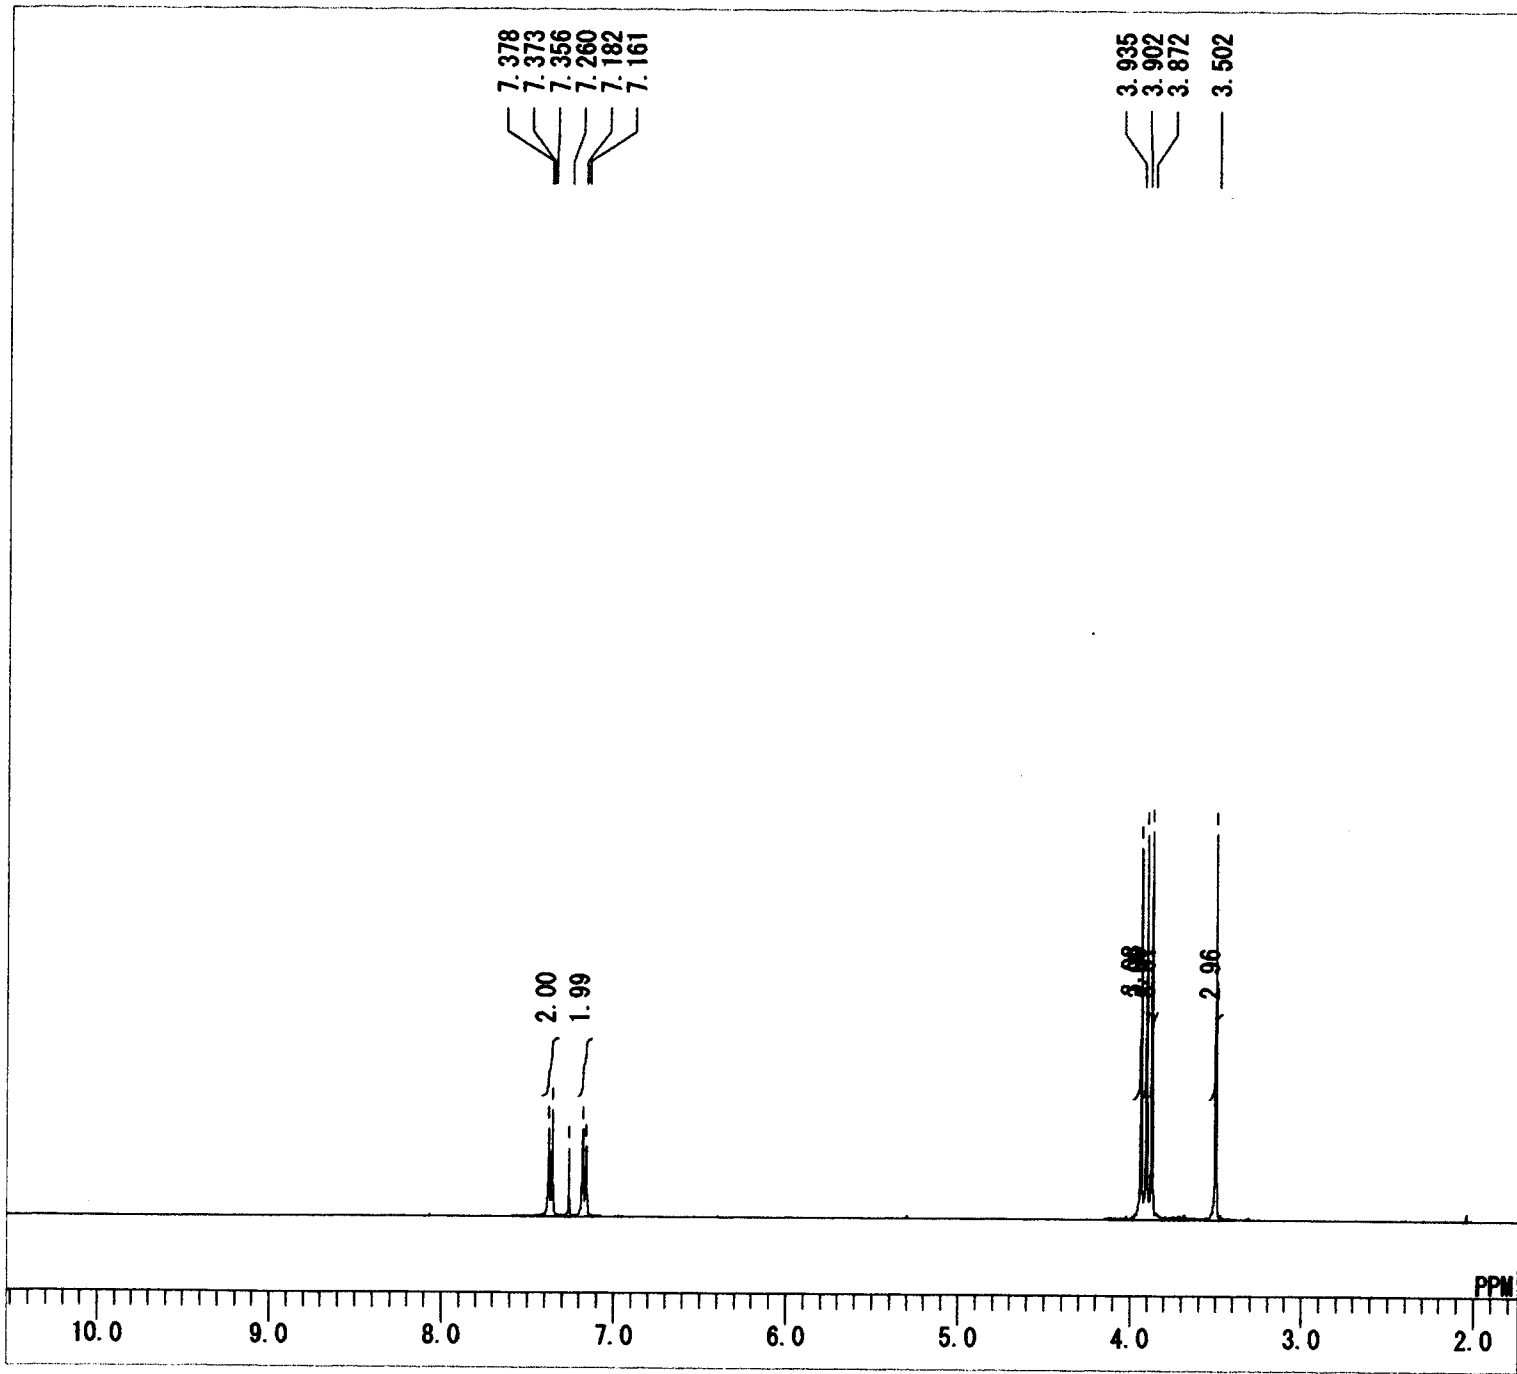

```

MENUF 1H
OBNUC 1H
OFR 399.65 MHz
OBSET 135.40 KHz
OBFIN 24.90 Hz
PW1 5.80 usec
DEADT 72.10 usec
PREDL 0.20000 msec
IWT 1.0000 msec
POINT 16384
SPO 16384
TIMES 8
DUMMY 1
FREQ 7992.01 Hz
FLT 4000 Hz
DELAY 50.00 usec
ACQTM 2.0501 sec
PD 4.9500 sec
ADBIT 16
RGAIN 17
BF 0.10 Hz
T1 0.00
T2 0.00
T3 90.00
T4 100.00
EXMOD NON
EXPCM NON:Single.coupled:PW1_ACQTM
IRNUC 1H
IFR 399.65 MHz
IRSET 136.90 KHz
IRFIN 97.50 Hz
IRRPW 45 usec
IRATN 511
DFILE CF3-PhCl+2diCO2Me-alkyne(1H).
SF TH5ATFG2
LKSET 61.60 KHz
LKFIN 79.0 Hz
LKLEV 180
LGAIN 25
LKPHS 231
LKSIG 1515
CSPED 10 Hz
FILDC
FILDF

```

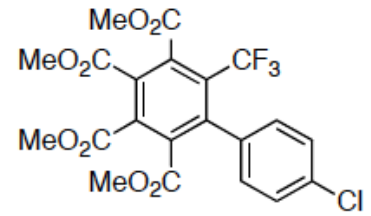

5j

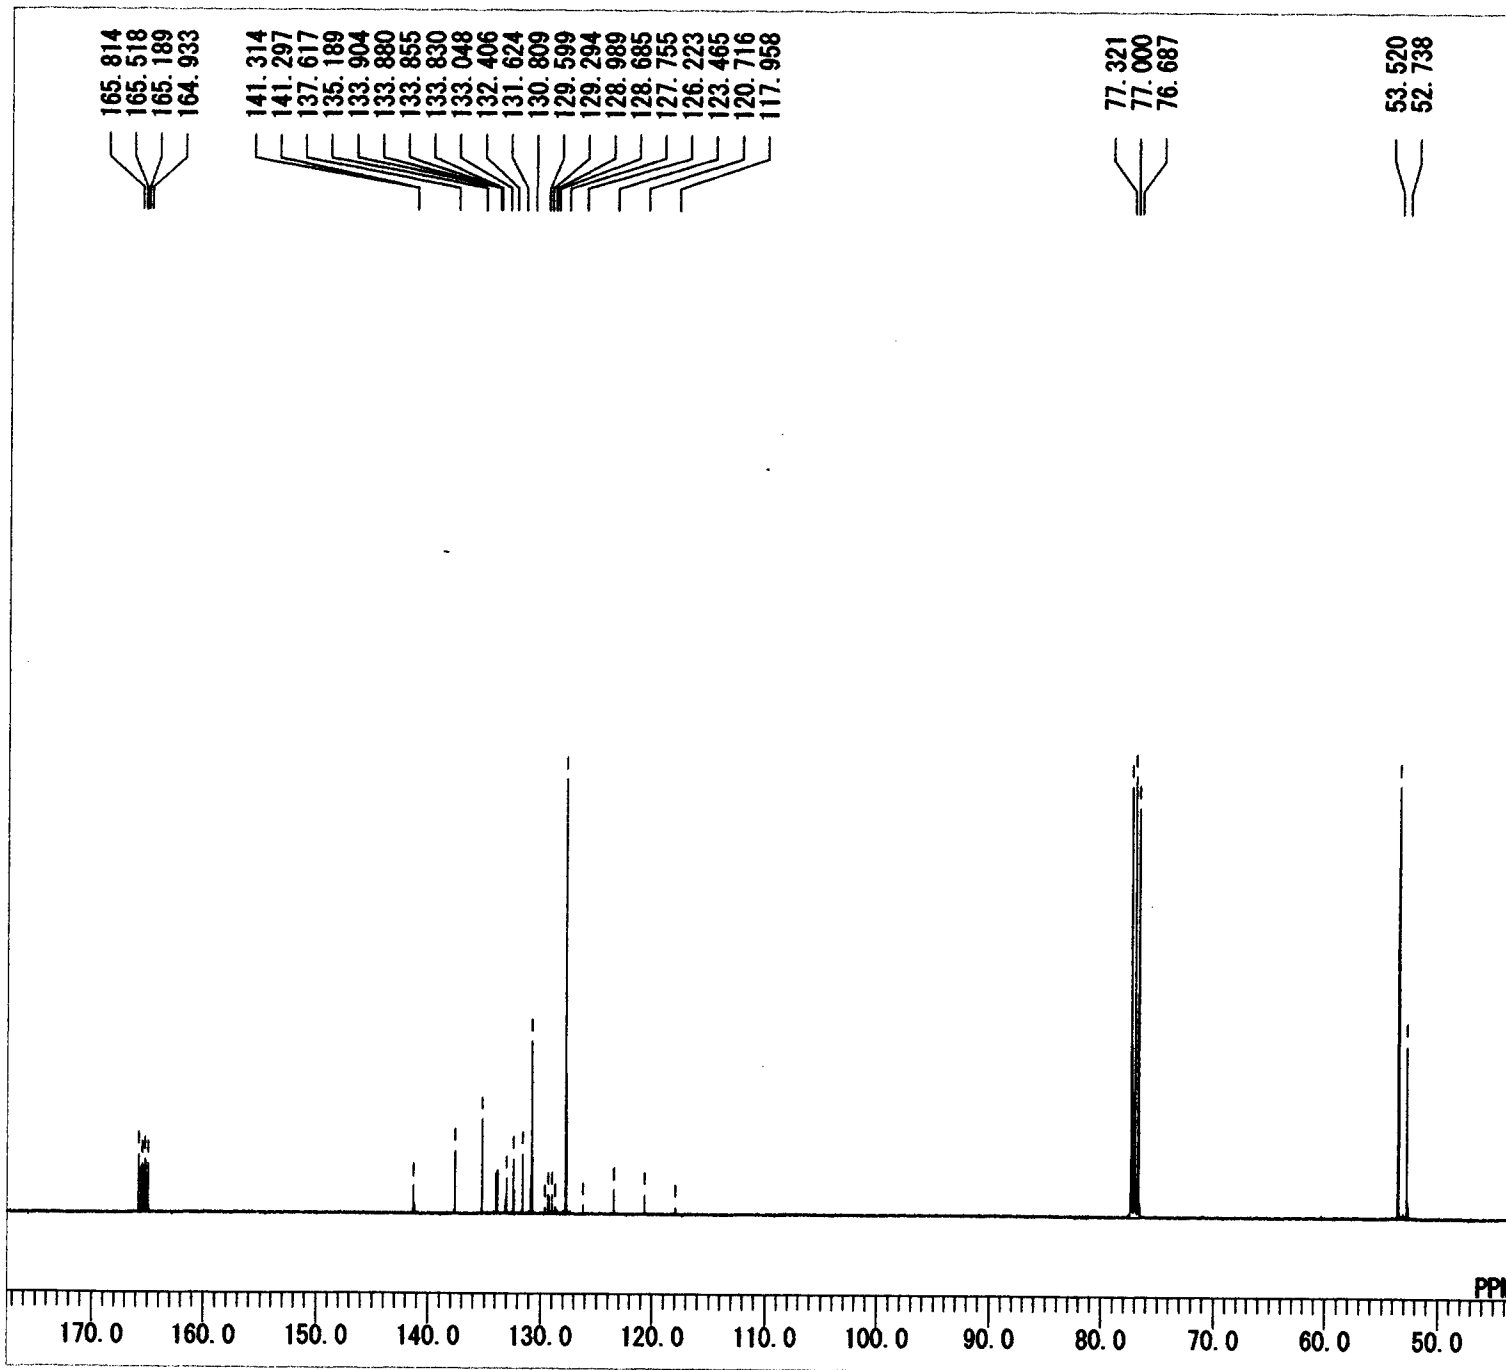

```

MENUF 13C
OBNUC 13C
OFR 100.40 MHz
OBSET 125.00 KHz
OBFIN 10500.00 Hz
PW1 6.00 usec
DEADT 19.10 usec
PREDL 0.20000 msec
IWT 1.0000 msec
POINT 32768
SPO 32768
TIMES 10000000
DUMMY 1
FREQ 27118.64 Hz
FLT 13550 Hz
DELAY 14.80 usec
ACQTM 1.2083 sec
PD 1.7920 sec
ADBIT 16
RGAIN 25
BF 0.60 Hz
T1 0.00
T2 0.00
T3 90.00
T4 100.00
EXMOD BCM
EXPCM Bilevel. complete. decoupling:
IRNUC 1H
IFR 399.65 MHz
IRSET 124.00 KHz
IRFIN 10500.00 Hz
IRRPW 45 usec
IRATN 511
DFILE CF3-PhCl+2diCO2Me-alkyne (13C)
SF TH5ATFG2
LKSET 61.60 KHz
LKFIN 79.0 Hz
LKLEV 180
LGA1N 25
LKPHS 231
LKSIG 1768
CSPED 14 Hz
FILDC
FILDF
  
```

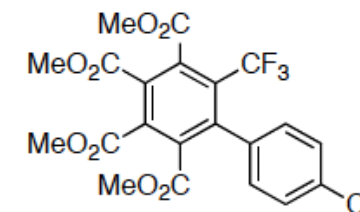

5j

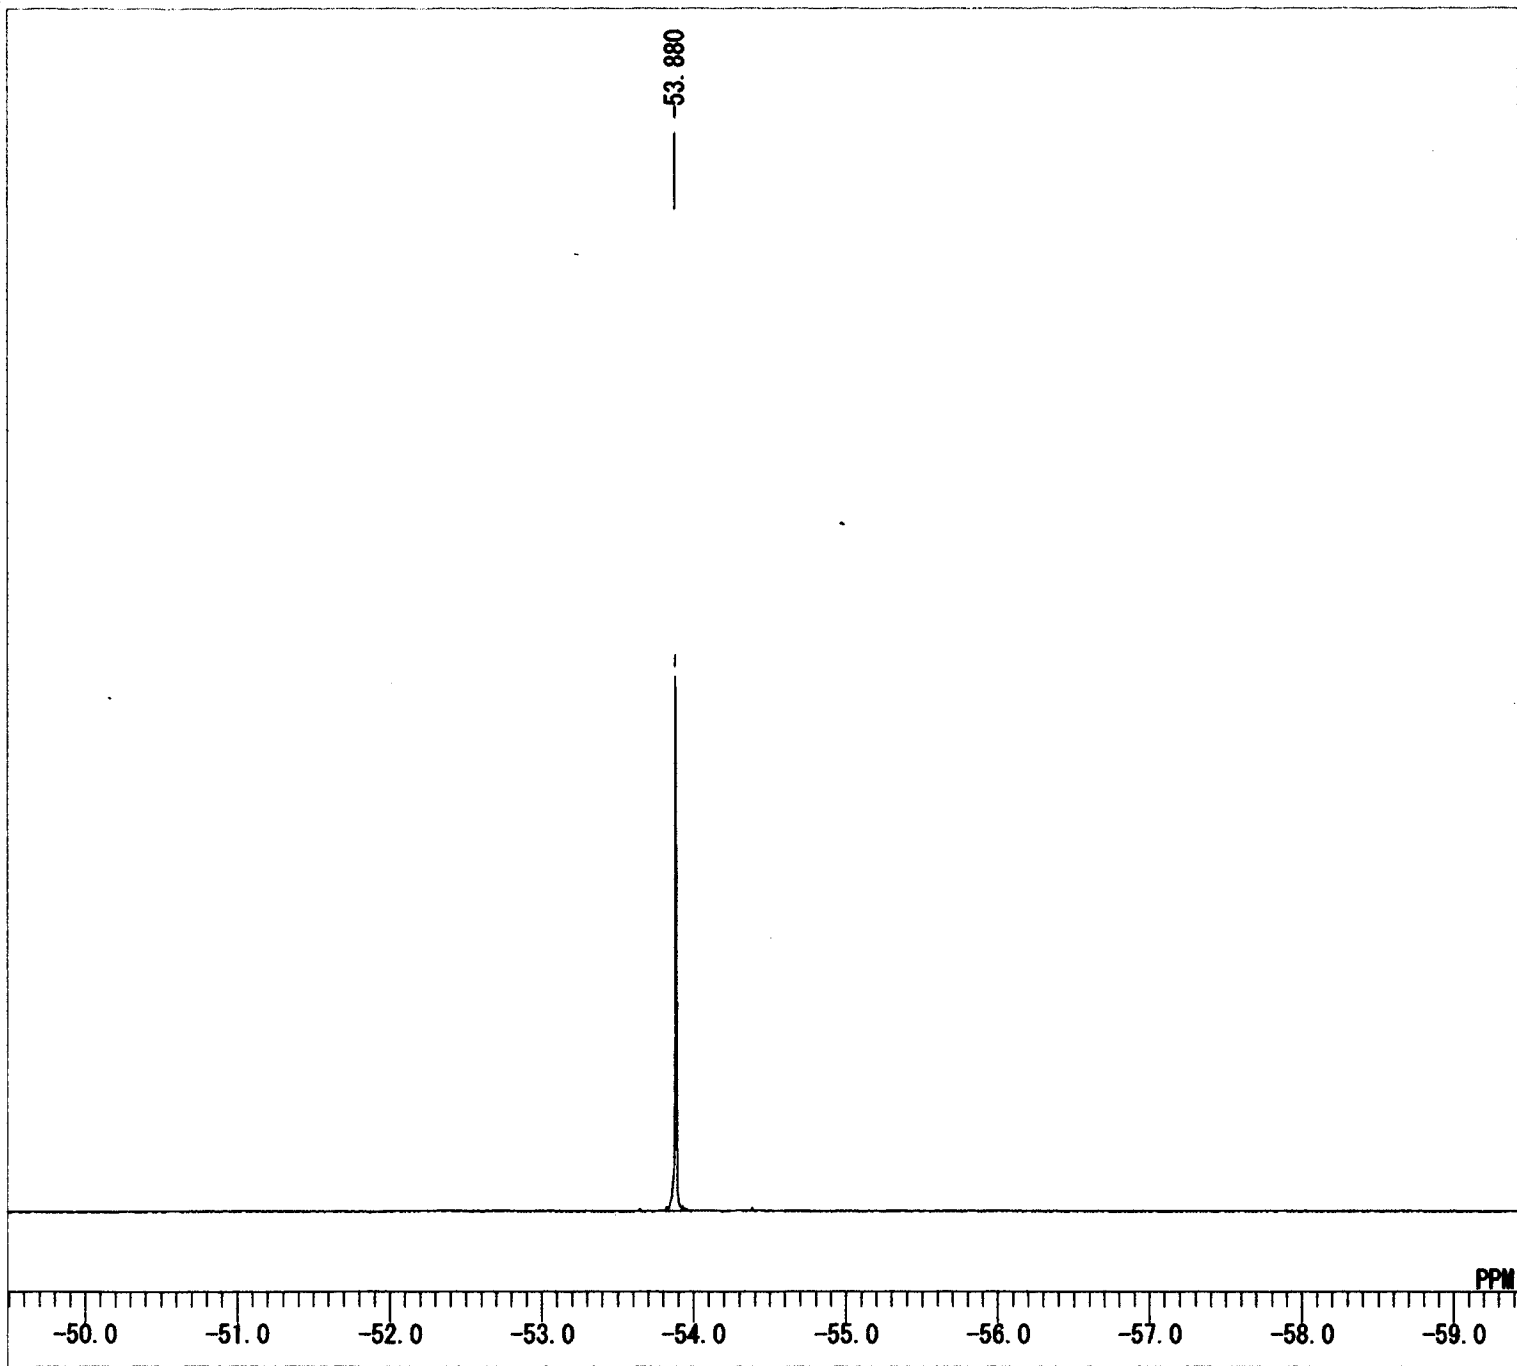

```

MENUF 19F
OBNUC 19F
OFR      376.05 MHz
OBSET    139.60 KHz
OBFIN    36.10 Hz
PW1      6.00 usec
DEADT    10.00 usec
PREDL    0.20000 msec
IWT      1.0000 msec
POINT    32768
SPO      32768
TIMES    16
DUMMY    1
FREQU    80000.00 Hz
FLT      40000 Hz
DELAY    5.00 usec
ACQTM    0.4096 sec
PD       4.9500 sec
ADBIT    16
RGAIN    14
BF        0.10 Hz
T1        0.00
T2        0.00
T3        90.00
T4       100.00
EXMOD    NON
EXPCM    NON:Single.coupled:PW1_ACQTM.
IRNUC    1H
IFR      399.65 MHz
IRSET    124.00 KHz
IRFIN    10500.00 Hz
IRRPW    45 usec
IRATN    511
DFILE    CF3-PhCl+2diC02Me-alkyne(19F)
SF       TH5ATFG2
LKSET    61.60 KHz
LKFIN    79.0 Hz
LKLEV    180
LGAIN    25
LKPHS    231
LKSIG    1506
CSPED    14 Hz
FILDC
FILDF
  
```

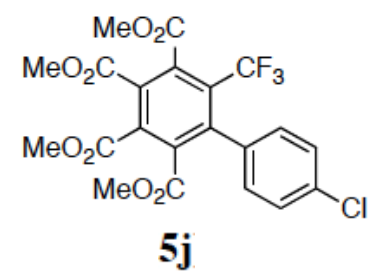

# <sup>19</sup>F NMR Analysis of the reaction mixture (Total yield for all CF<sub>3</sub>-containing compounds : 86%)

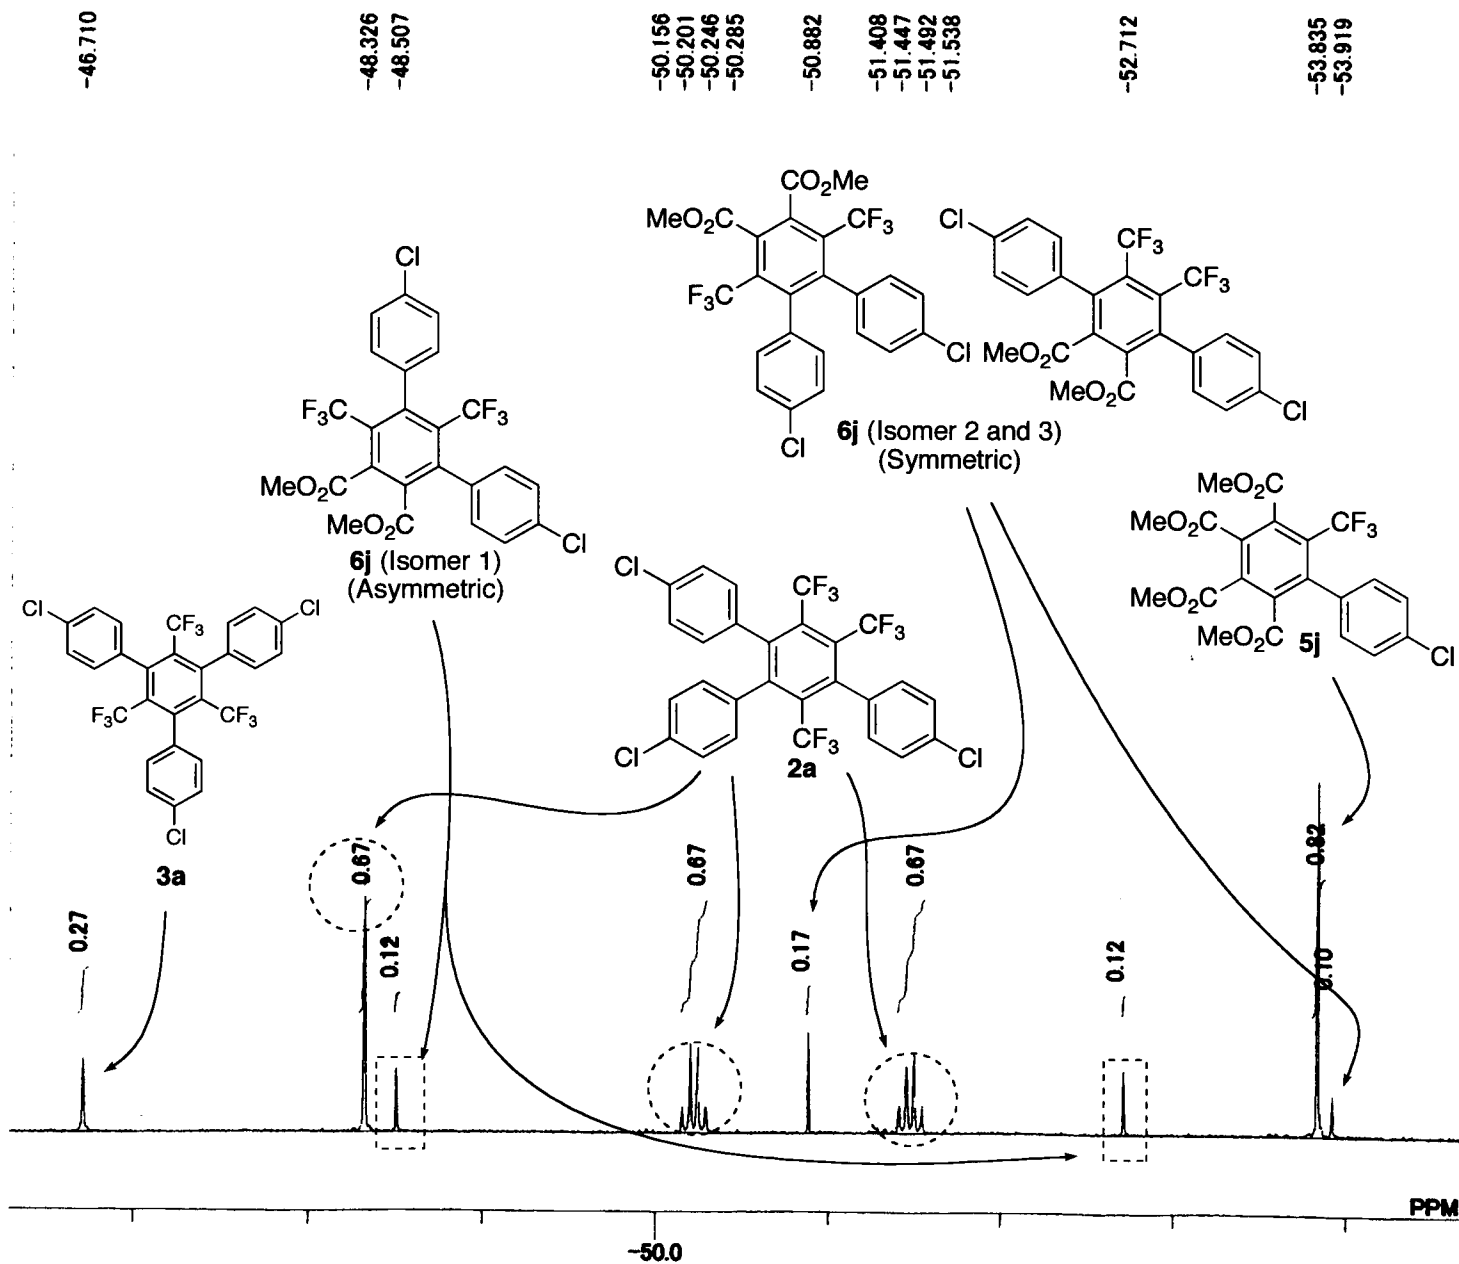

MENUF 19F  
 OBNUC 19F  
 OFR 376.05 MHz  
 OBSET 139.60 KHz  
 OBFIN 36.10 Hz  
 PW1 6.00 usec  
 DEADT 10.00 usec  
 PREDL 0.2000 msec  
 IWT 1.0000 msec  
 POINT 32768  
 SPO 32768  
 TIMES 16  
 DUMMY 1  
 FREQU 80000.00 Hz  
 FLT 40000 Hz  
 DELAY 5.00 usec  
 ACQTM 0.4096 sec  
 PD 4.9500 sec  
 ADBIT 16  
 RGAIN 14  
 BF 0.10 Hz  
 T1 0.00  
 T2 0.00  
 T3 90.00  
 T4 100.00  
 EXMOD NON  
 EXPCM NON:Single.coupled:PW1\_ACQTM\_PD:  
 IRNUC 1H  
 IFR 399.65 MHz  
 IRSET 124.00 KHz  
 IRFIN 10500.00 Hz  
 IRRPW 45 usec  
 IRATN 511  
 DFILE DEFAULT.ALS  
 SF TH5ATFG2  
 LKSET 61.60 KHz  
 LKFIN 79.0 Hz  
 LKLEV 180  
 LGAIN 25  
 LKPHS 231  
 LKSIG 1717  
 CSPED 10 Hz  
 FILDC  
 FILDF

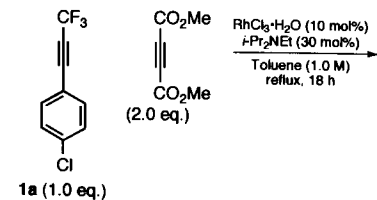



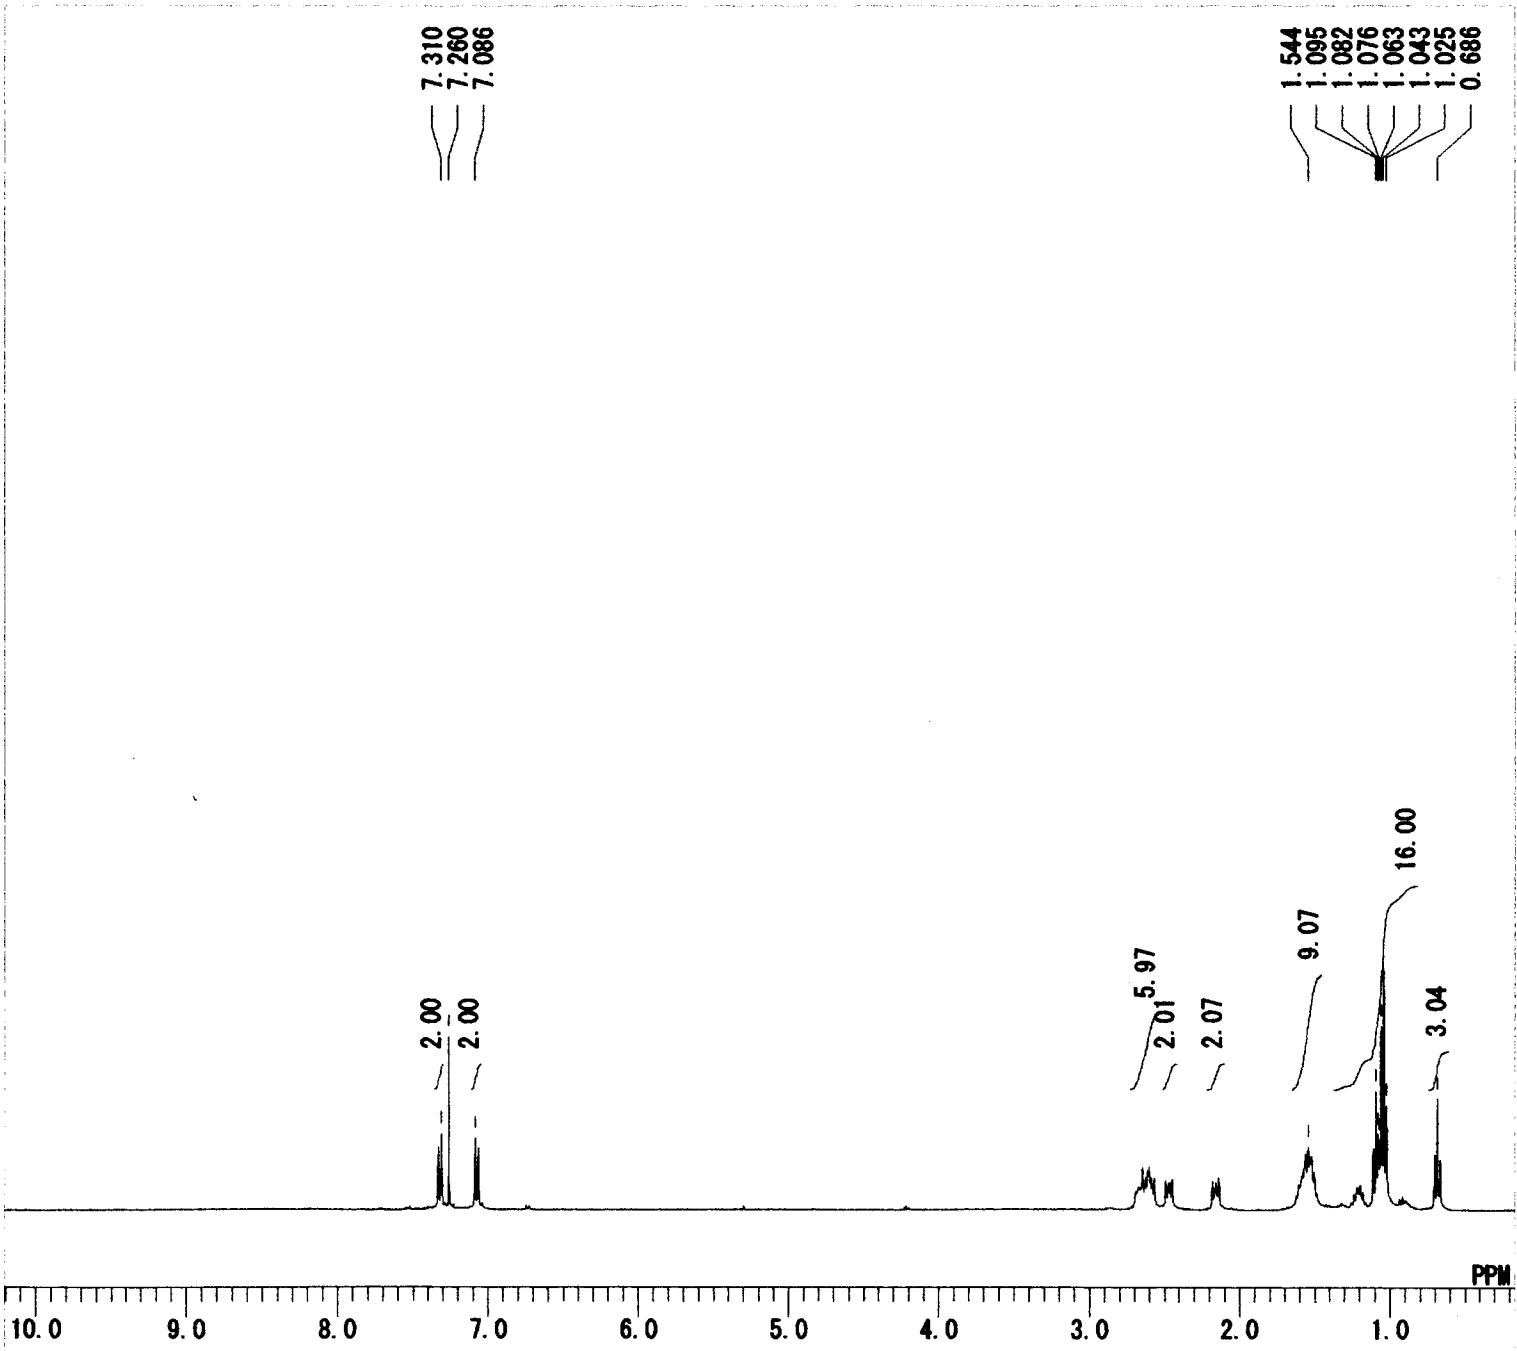

```

MENUF 1H
OBNUC 1H
OFR 399.65 MHz
OBSET 135.40 KHz
OBFIN 24.90 Hz
PW1 5.80 usec
DEADT 72.10 usec
PREDL 0.20000 msec
IWT 1.0000 msec
POINT 16384
SPO 16384
TIMES 8
DUMMY 1
FREQU 7992.01 Hz
FLT 4000 Hz
DELAY 50.00 usec
ACQTM 2.0501 sec
PD 4.9500 sec
ADBIT 16
RGAIN 17
BF 0.10 Hz
T1 0.00
T2 0.00
T3 90.00
T4 100.00
EXMOD NON
EXPCM NON:Single.coupled:PW1_ACQTM
IRNUC 1H
IFR 399.65 MHz
IRSET 136.90 KHz
IRFIN 97.50 Hz
IRRPW 45 usec
IRATN 511
DFILE product-alkyne-p-Cl-di(n-Pr)
SF TH5ATFG2
LKSET 61.60 KHz
LKFIN 79.0 Hz
LKLEV 180
LGAIN 22
LKPHS 250
LKSIG 730
CSPED 11 Hz
FILDC
FILDF

```

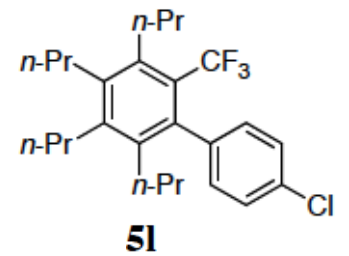

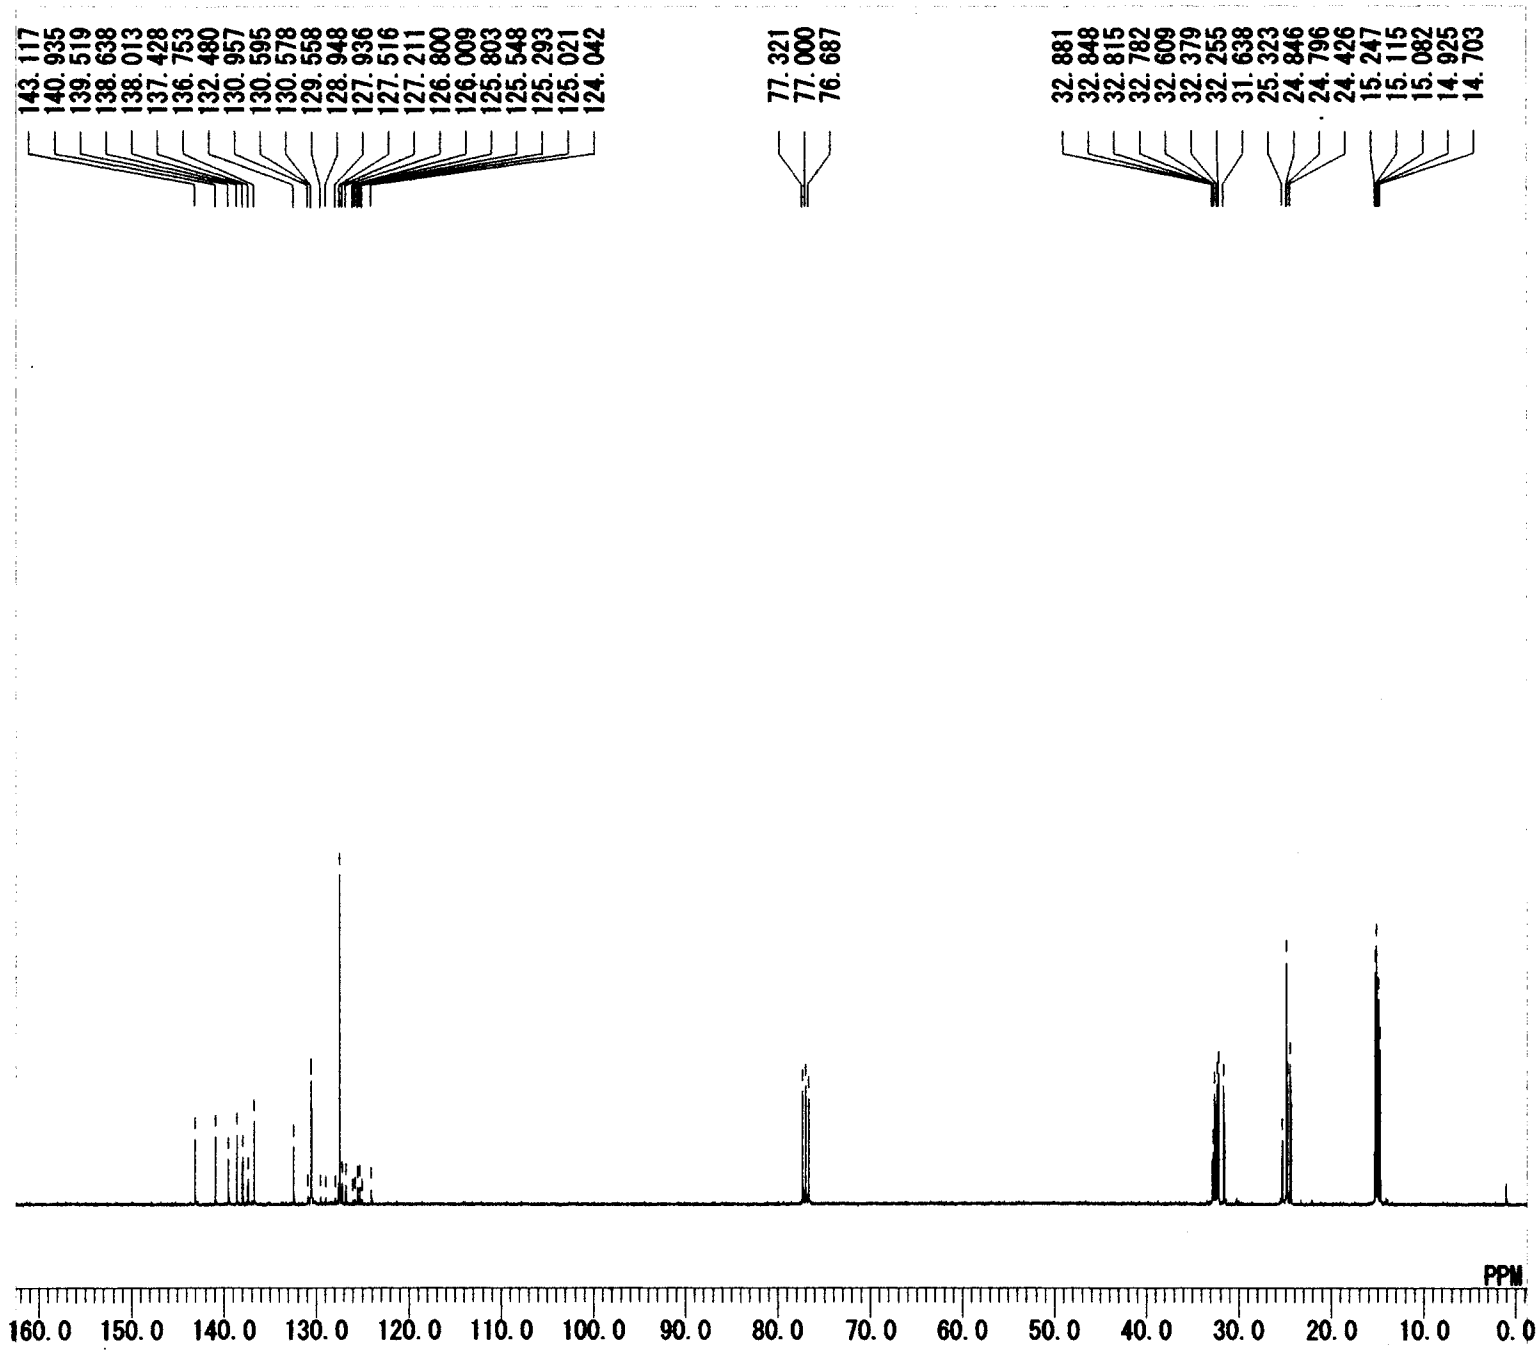

```

MENUF 13C
OBNUC 13C
OFR 100.40 MHz
OBSET 125.00 KHz
OBFIN 10500.00 Hz
PW1 6.00 usec
DEADT 19.10 usec
PREDL 0.20000 msec
IWT 1.0000 msec
POINT 32768
SPO 32768
TIMES 1024
DUMMY 1
FREQU 27118.64 Hz
FLT 13550 Hz
DELAY 14.80 usec
ACQTM 1.2083 sec
PD 1.7920 sec
ADBIT 16
RGAIN 24
BF 0.10 Hz
T1 0.00
T2 0.00
T3 90.00
T4 100.00
EXMOD BCM
EXPCM Bilevel. complete. decoupling:
IRNUC 1H
IFR 399.65 MHz
IRSET 124.00 KHz
IRFIN 10500.00 Hz
IRRPW 45 usec
IRATN 511
DFILE product-alkyne-p-Cl-di(n-Pr)
SF TH5ATFG2
LKSET 61.60 KHz
LKFIN 79.0 Hz
LKLEV 180
LGAIN 25
LKPHS 250
LKSIG 1111
CSPED 13 Hz
FILDC
FILDF

```

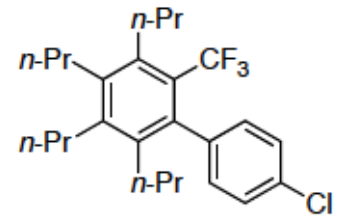



# <sup>19</sup>F NMR Analysis of the reaction mixture (Total yield for all CF<sub>3</sub>-containing compounds : 100%)

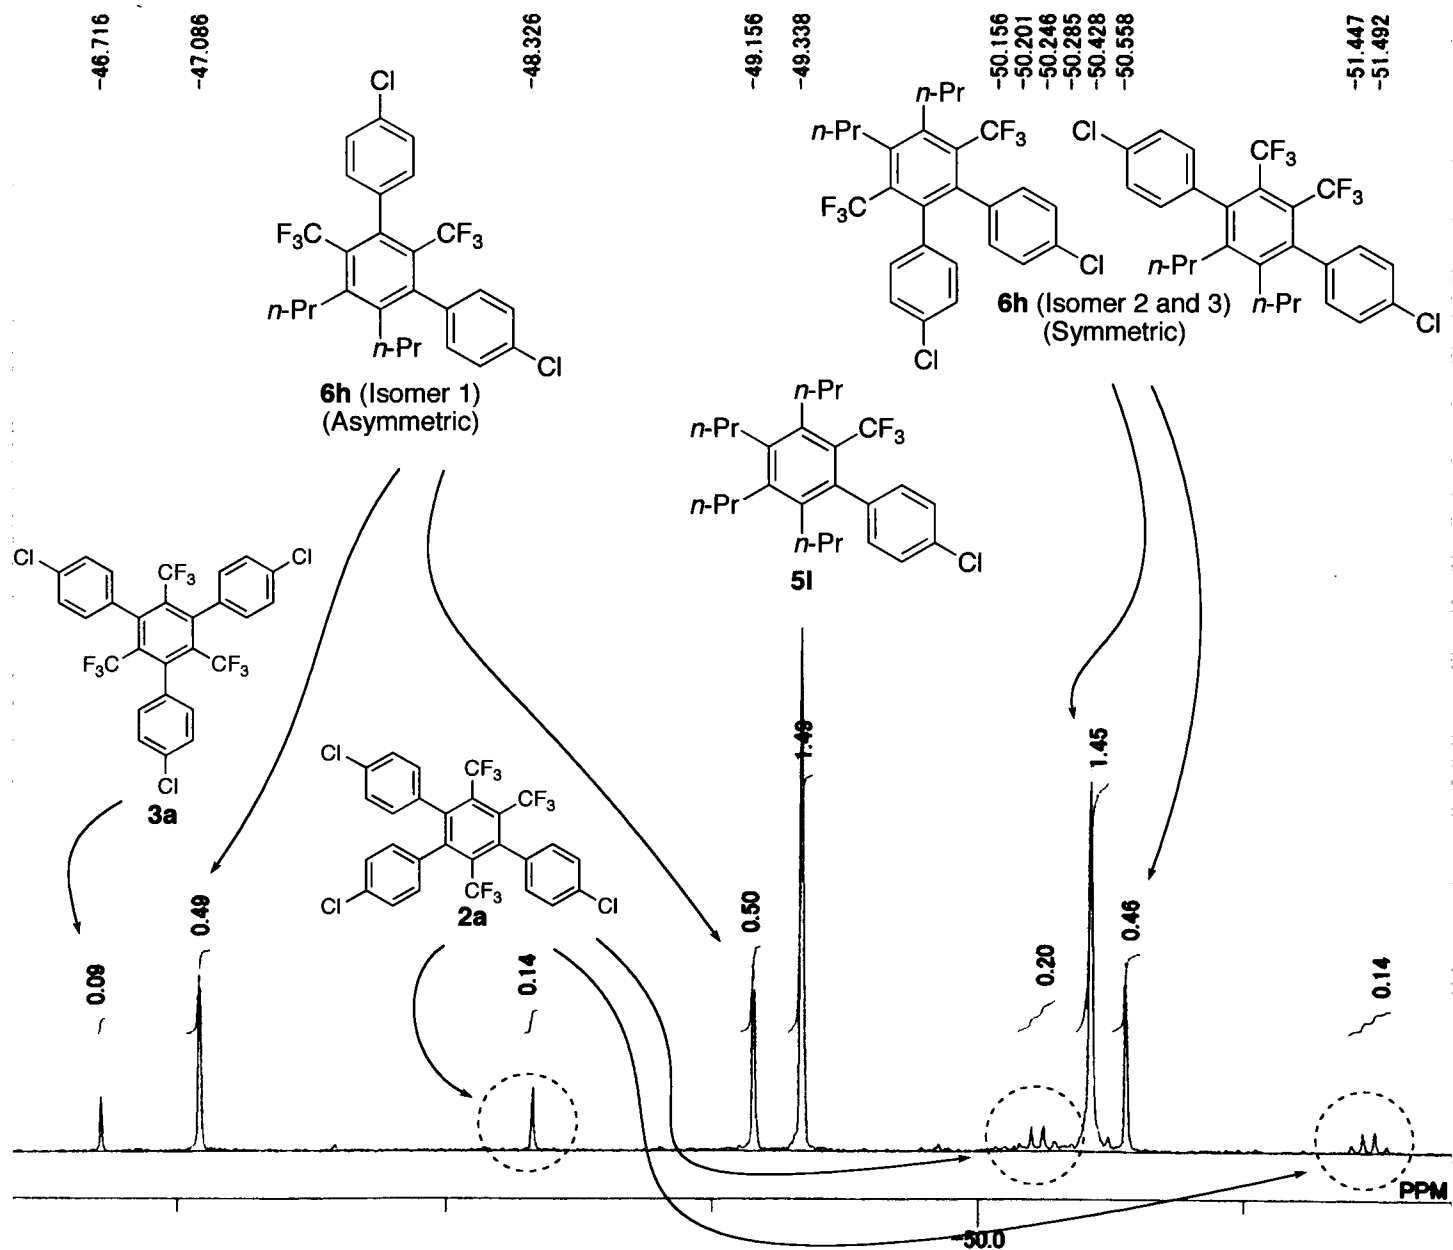

| MENUF | 19F                              |
|-------|----------------------------------|
| OBNUC | 19F                              |
| OFR   | 376.05 MHz                       |
| OBSET | 139.60 KHz                       |
| OBFIN | 36.10 Hz                         |
| PW1   | 6.00 usec                        |
| DEADT | 10.00 usec                       |
| PREDL | 0.20000 msec                     |
| IWT   | 1.0000 msec                      |
| POINT | 32768                            |
| SPO   | 32768                            |
| TIMES | 16                               |
| DUMMY | 1                                |
| FREQU | 80000.00 Hz                      |
| FLT   | 40000 Hz                         |
| DELAY | 5.00 usec                        |
| ACQTM | 0.4096 sec                       |
| PD    | 4.9500 sec                       |
| ADBIT | 16                               |
| RGAIN | 14                               |
| BF    | 0.10 Hz                          |
| T1    | 0.00                             |
| T2    | 0.00                             |
| T3    | 90.00                            |
| T4    | 100.00                           |
| EXMOD | NON                              |
| EXPCM | NON:Single.coupled:PW1_ACQTM_PD: |
| IRNUC | 1H                               |
| IFR   | 399.65 MHz                       |
| IRSET | 124.00 KHz                       |
| IRFIN | 10500.00 Hz                      |
| IRRPW | 45 usec                          |
| IRATN | 511                              |
| DFILE | _DEFAULT.ALS                     |
| SF    | TH5ATFG2                         |
| LKSET | 81.60 KHz                        |
| LKFIN | 79.0 Hz                          |
| LKLEV | 180                              |
| LGAIN | 21                               |
| LKPHS | 231                              |
| LKSIG | 570                              |
| CSPED | 12 Hz                            |
| FILDC |                                  |
| FILDF |                                  |

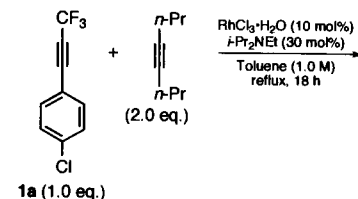

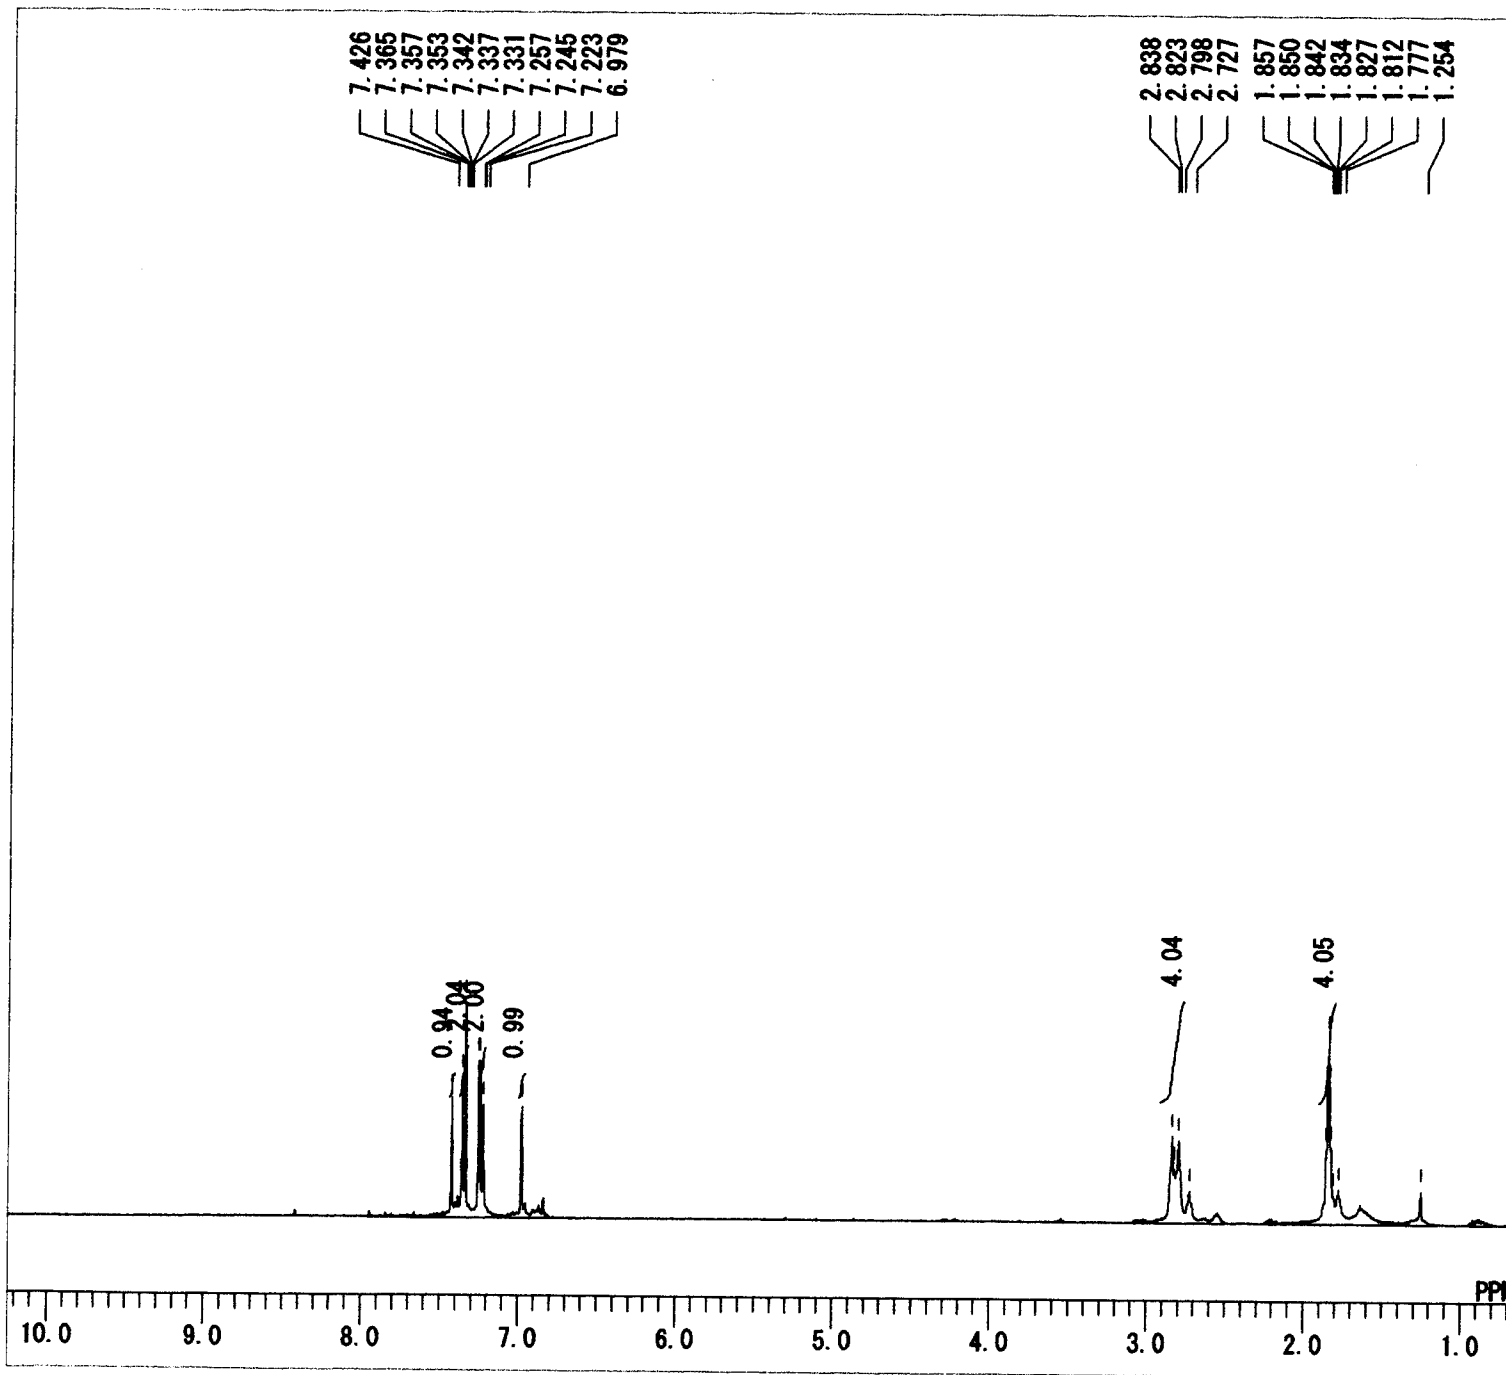

```

MENUF 1H
OBNUC 1H
OFR 399.65 MHz
OBSET 135.40 KHz
OBFIN 24.90 Hz
PW1 5.80 usec
DEADT 72.10 usec
PREDL 0.20000 msec
IWT 1.0000 msec
POINT 16384
SPO 16384
TIMES 8
DUMMY 1
FREQU 7992.01 Hz
FLT 4000 Hz
DELAY 50.00 usec
ACQTM 2.0501 sec
PD 4.9500 sec
ADBIT 16
RGAIN 17
BF 0.00 Hz
T1 0.00
T2 0.00
T3 90.00
T4 100.00
EXMOD NON
EXPCM NON:Single.coupled:PW1_ACQTM
IRNUC 1H
IFR 399.65 MHz
IRSET 136.90 KHz
IRFIN 97.50 Hz
IRRPW 45 usec
IRATN 511
DFILE CF3-PhCl+1,7-octadiyne (1H).a
SF TH5ATFG2
LKSET 61.60 KHz
LKFIN 79.0 Hz
LKLEV 180
LGAIN 24
LKPHS 250
LKSIG 1153
CSPED 11 Hz
FILDC
FILDF

```

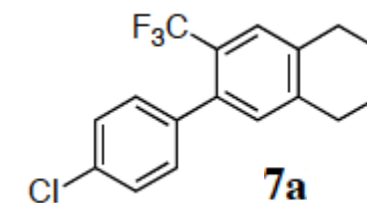



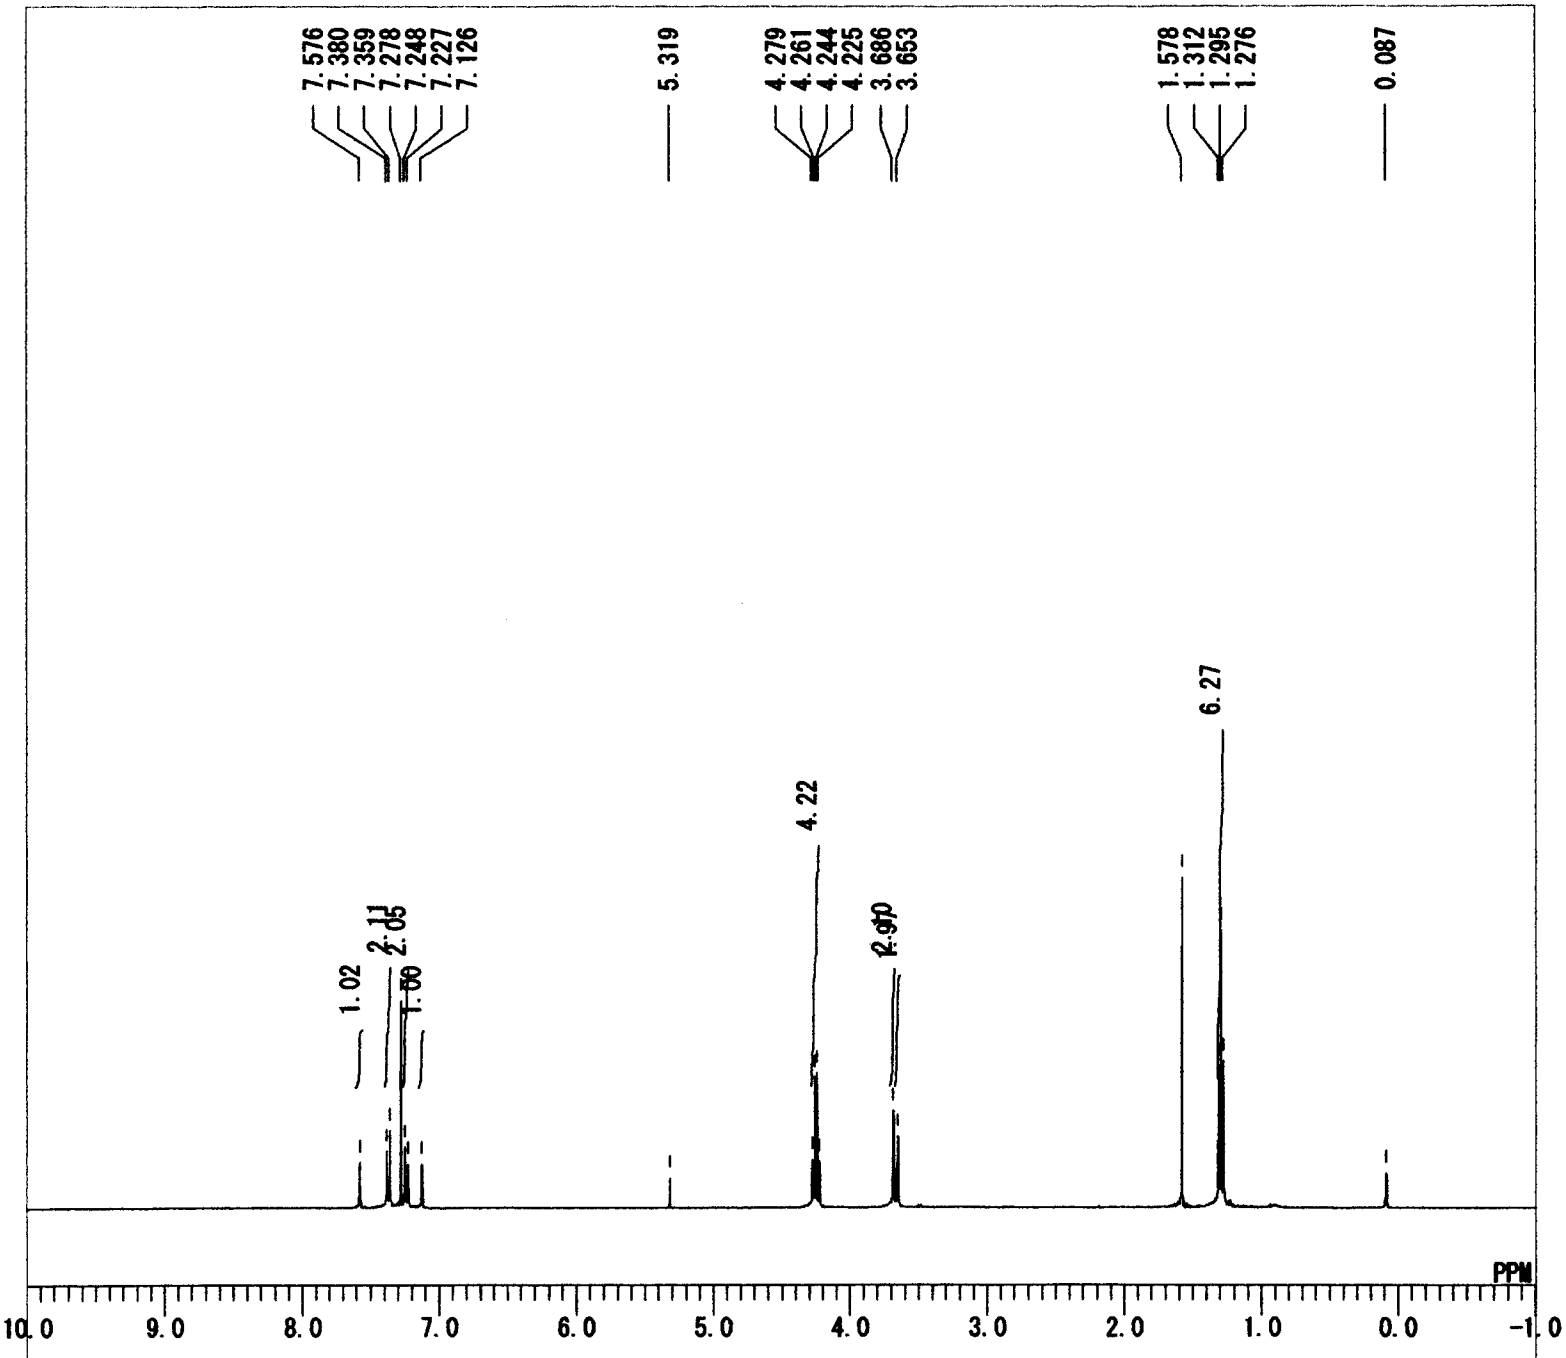

```

MENUF 1H
OBNUC 1H
OFR 399.65 MHz
OBSET 135.40 KHz
OBFIN 24.90 Hz
PW1 5.20 usec
DEADT 72.40 usec
PREDL 0.20000 msec
IWT 1.0000 msec
POINT 16384
SPO 16384
TIMES 8
DUMMY 1
FREQU 7992.01 Hz
FLT 4000 Hz
DELAY 50.00 usec
ACQTM 2.0501 sec
PD 4.9500 sec
ADBIT 16
RGAIN 20
BF 0.10 Hz
T1 0.00
T2 0.00
T3 90.00
T4 100.00
EXMOD NON
EXPCM NON: Single. coupled: PW1_ACQTM
IRNUC 1H
IFR 399.65 MHz
IRSET 136.90 KHz
IRFIN 97.50 Hz
IRRPW 45 usec
IRATN 511
DFILE product-p-Cl(1H).als
SF TH5ATFG2
LKSET 61.60 KHz
LKFIN 79.0 Hz
LKLEV 180
LGAIN 26
LKPHS 219
LKSIG 2104
CSPED 11 Hz
FILDC
FILDF

```

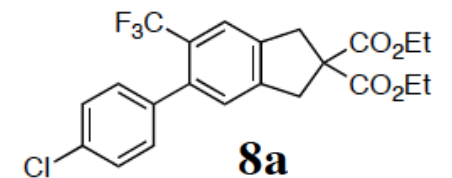

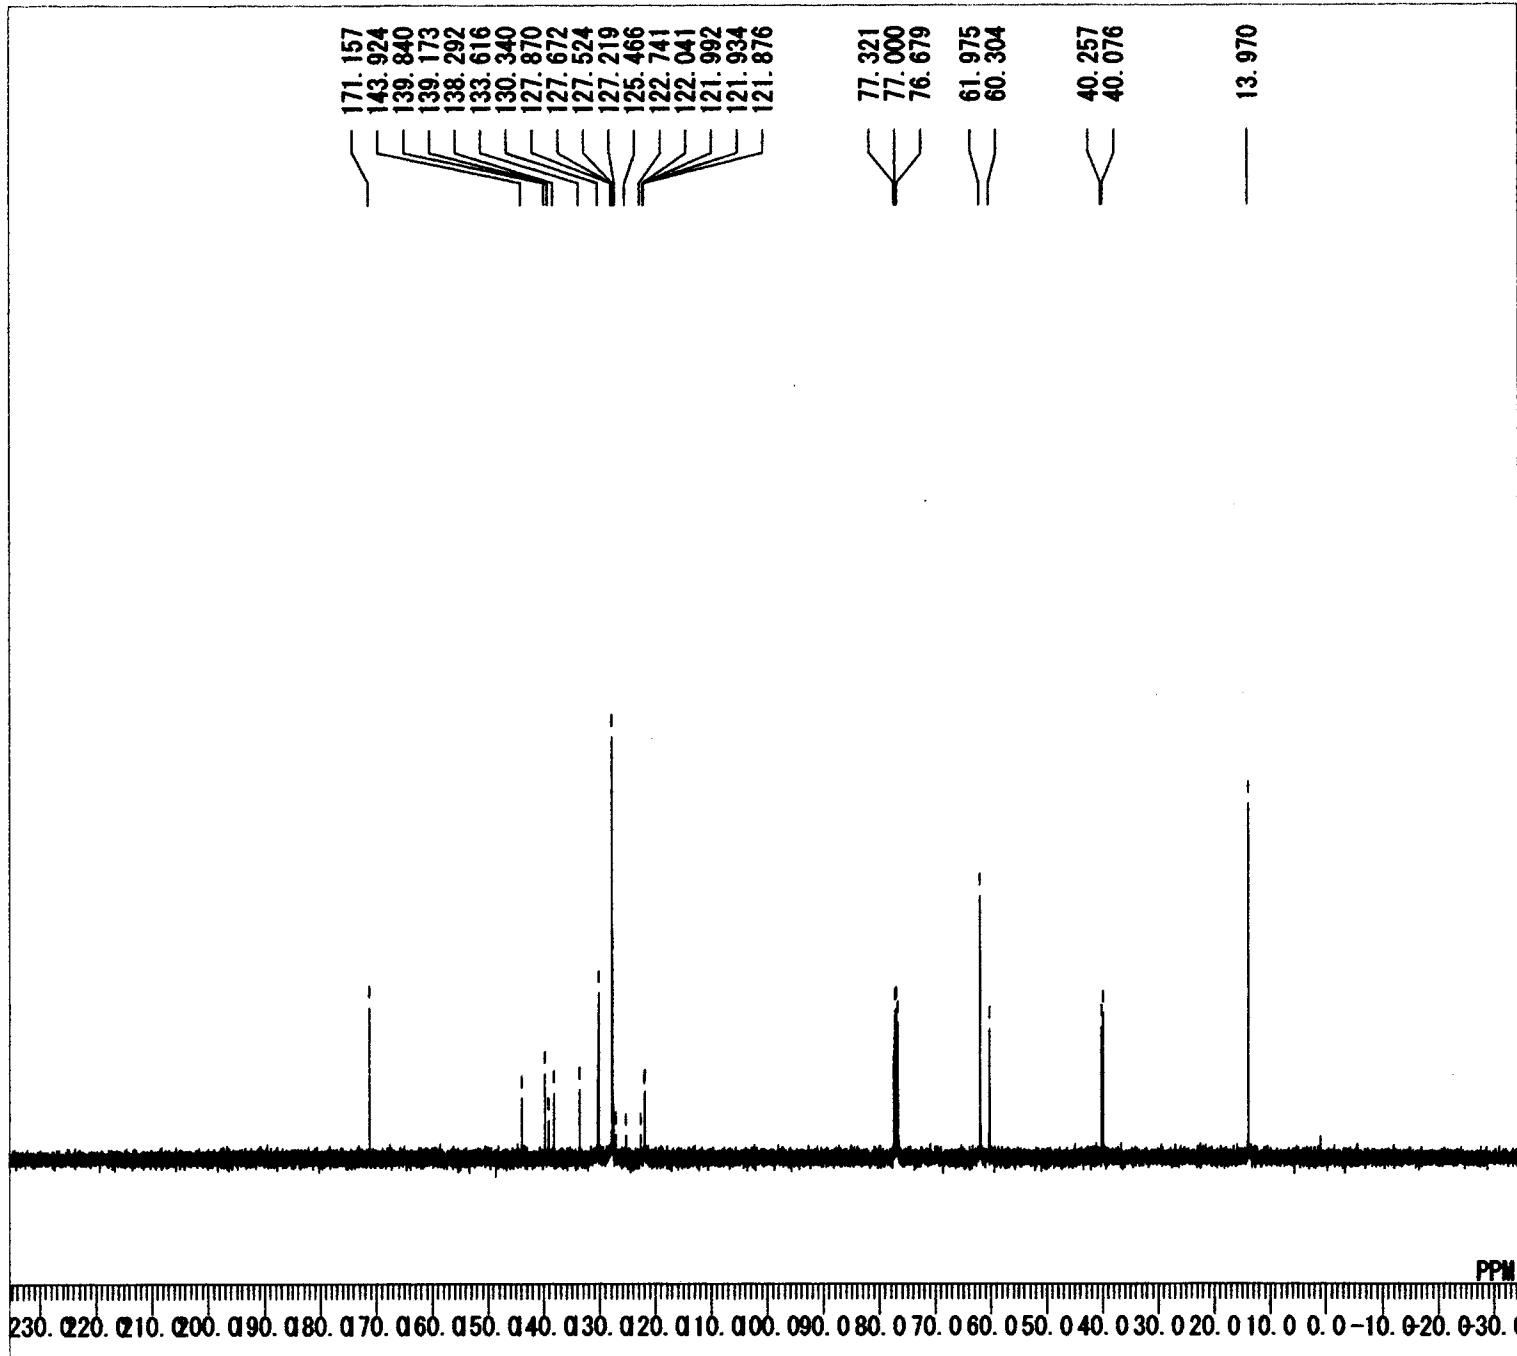

MENUF 13C  
 OBNUC 13C  
 OFR 100.40 MHz  
 OBSSET 125.00 KHz  
 OBF IN 10500.00 Hz  
 PW1 6.00 usec  
 DEADT 19.10 usec  
 PREDL 0.20000 msec  
 IWT 1.0000 msec  
 POINT 32768  
 SPO 32768  
 TIMES 256  
 DUMMY 1  
 FREQU 27118.64 Hz  
 FLT 13550 Hz  
 DELAY 14.80 usec  
 ACQTM 1.2083 sec  
 PD 1.7920 sec  
 ADBIT 16  
 RGA IN 25  
 BF 0.10 Hz  
 T1 0.00  
 T2 0.00  
 T3 90.00  
 T4 100.00  
 EXMOD BCM  
 EXPCM Bilevel. complete. decoupling:  
 IRNUC 1H  
 IFR 399.65 MHz  
 IRSET 124.00 KHz  
 IRF IN 10500.00 Hz  
 IRRPW 45 usec  
 IRATN 511  
 DFILE product-p-CI (13C).als  
 SF TH5ATFG2  
 LKSET 61.60 KHz  
 LKF IN 79.0 Hz  
 LKLEV 180  
 LGAIN 25  
 LKPHS 219  
 LKSIG 291  
 CSPED 11 Hz  
 FILDC  
 FILDf

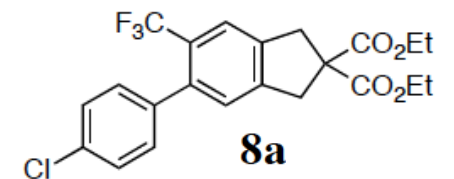



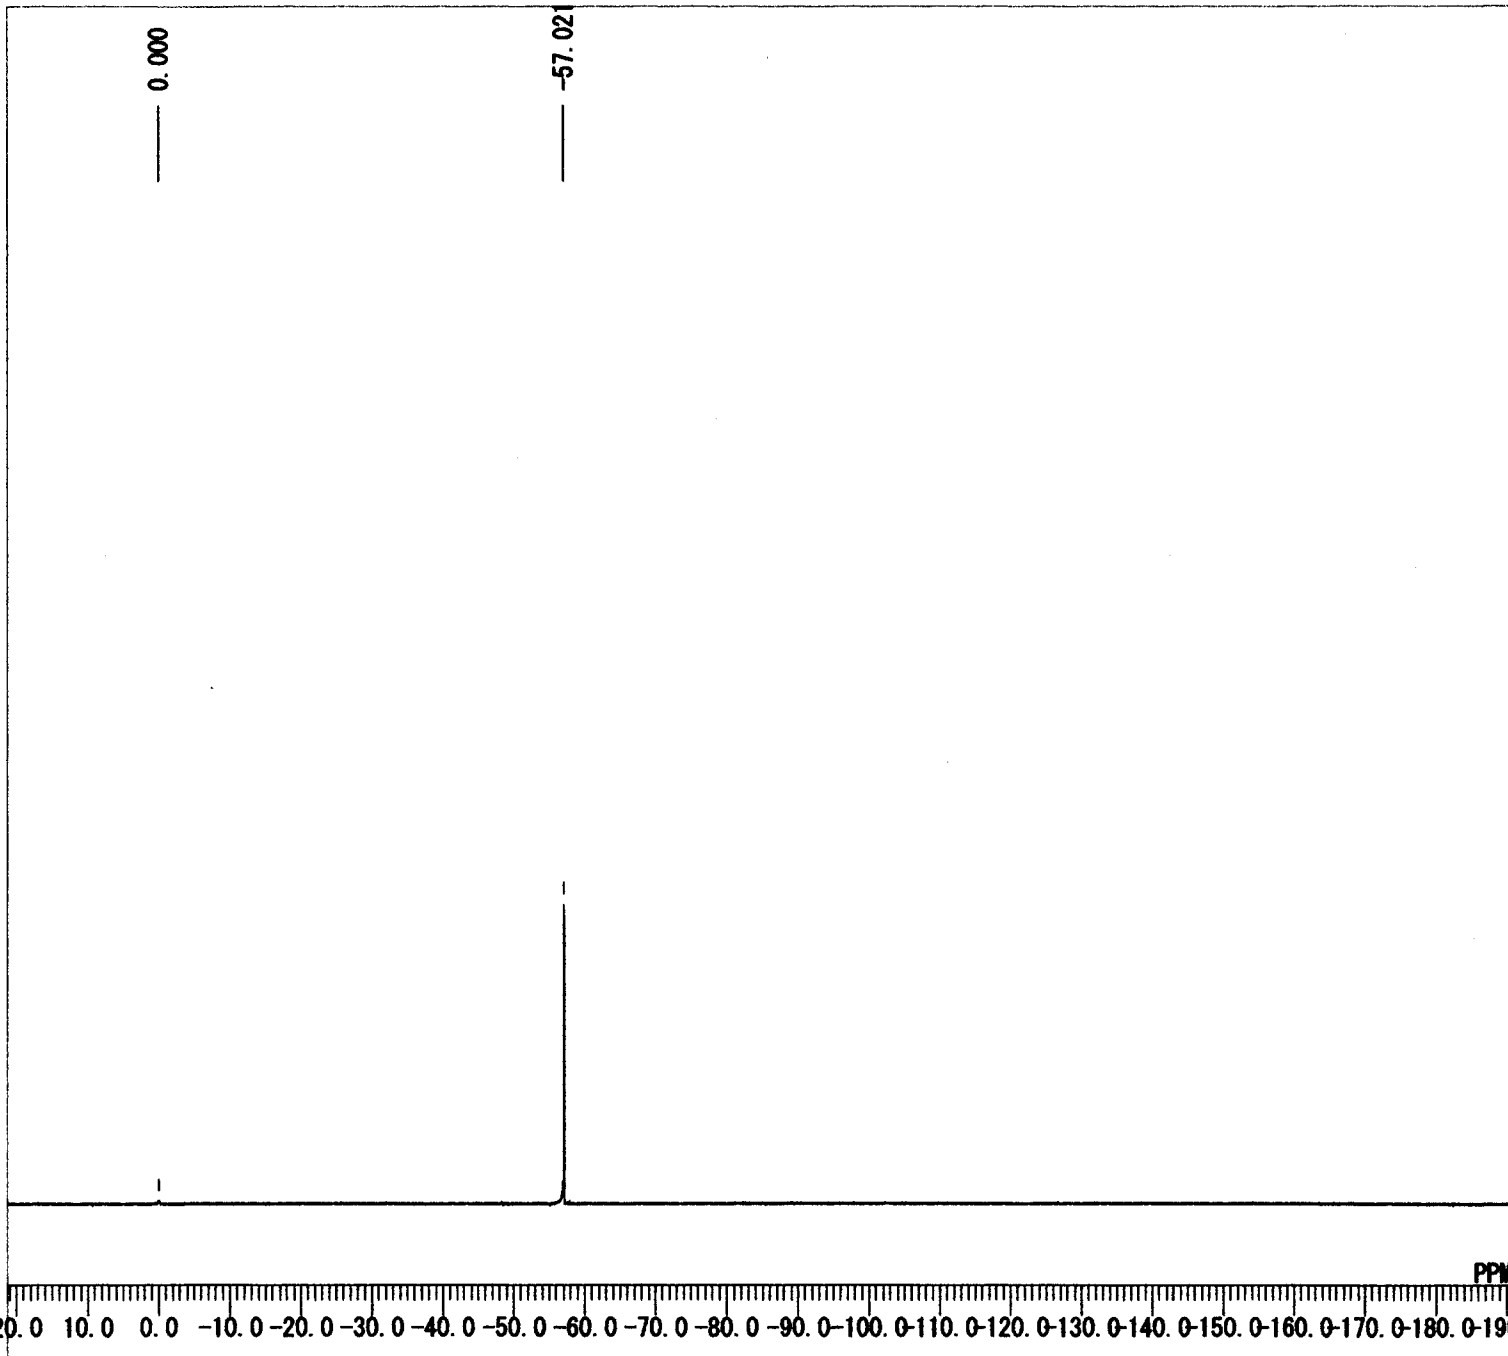

```

MENUF 19F
OBNUC 19F
OFR 376.05 MHz
OBSET 139.60 KHz
OBFIN 36.10 Hz
PW1 6.00 usec
DEADT 10.00 usec
PREDL 0.20000 msec
IWT 1.0000 msec
POINT 32768
SPO 32768
TIMES 16
DUMMY 1
FREQU 80000.00 Hz
FLT 40000 Hz
DELAY 5.00 usec
ACQTM 0.4096 sec
PD 4.9500 sec
ADBIT 16
RGAIN 14
BF 0.10 Hz
T1 0.00
T2 0.00
T3 90.00
T4 100.00
EXMOD NON
EXPCM NON:Single.coupled:PW1_ACQTM
IRNUC 1H
IFR 399.65 MHz
IRSET 124.00 KHz
IRFIN 10500.00 Hz
IRRPW 45 usec
IRATN 511
DFILE product-p-Cl(19F).als
SF TH5ATFG2
LKSET 61.60 KHz
LKFIN 79.0 Hz
LKLEV 180
LGAIN 27
LKPHS 219
LKSIG 396
CSPED 11 Hz
FILDC
FILDF

```

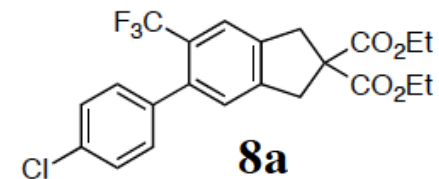

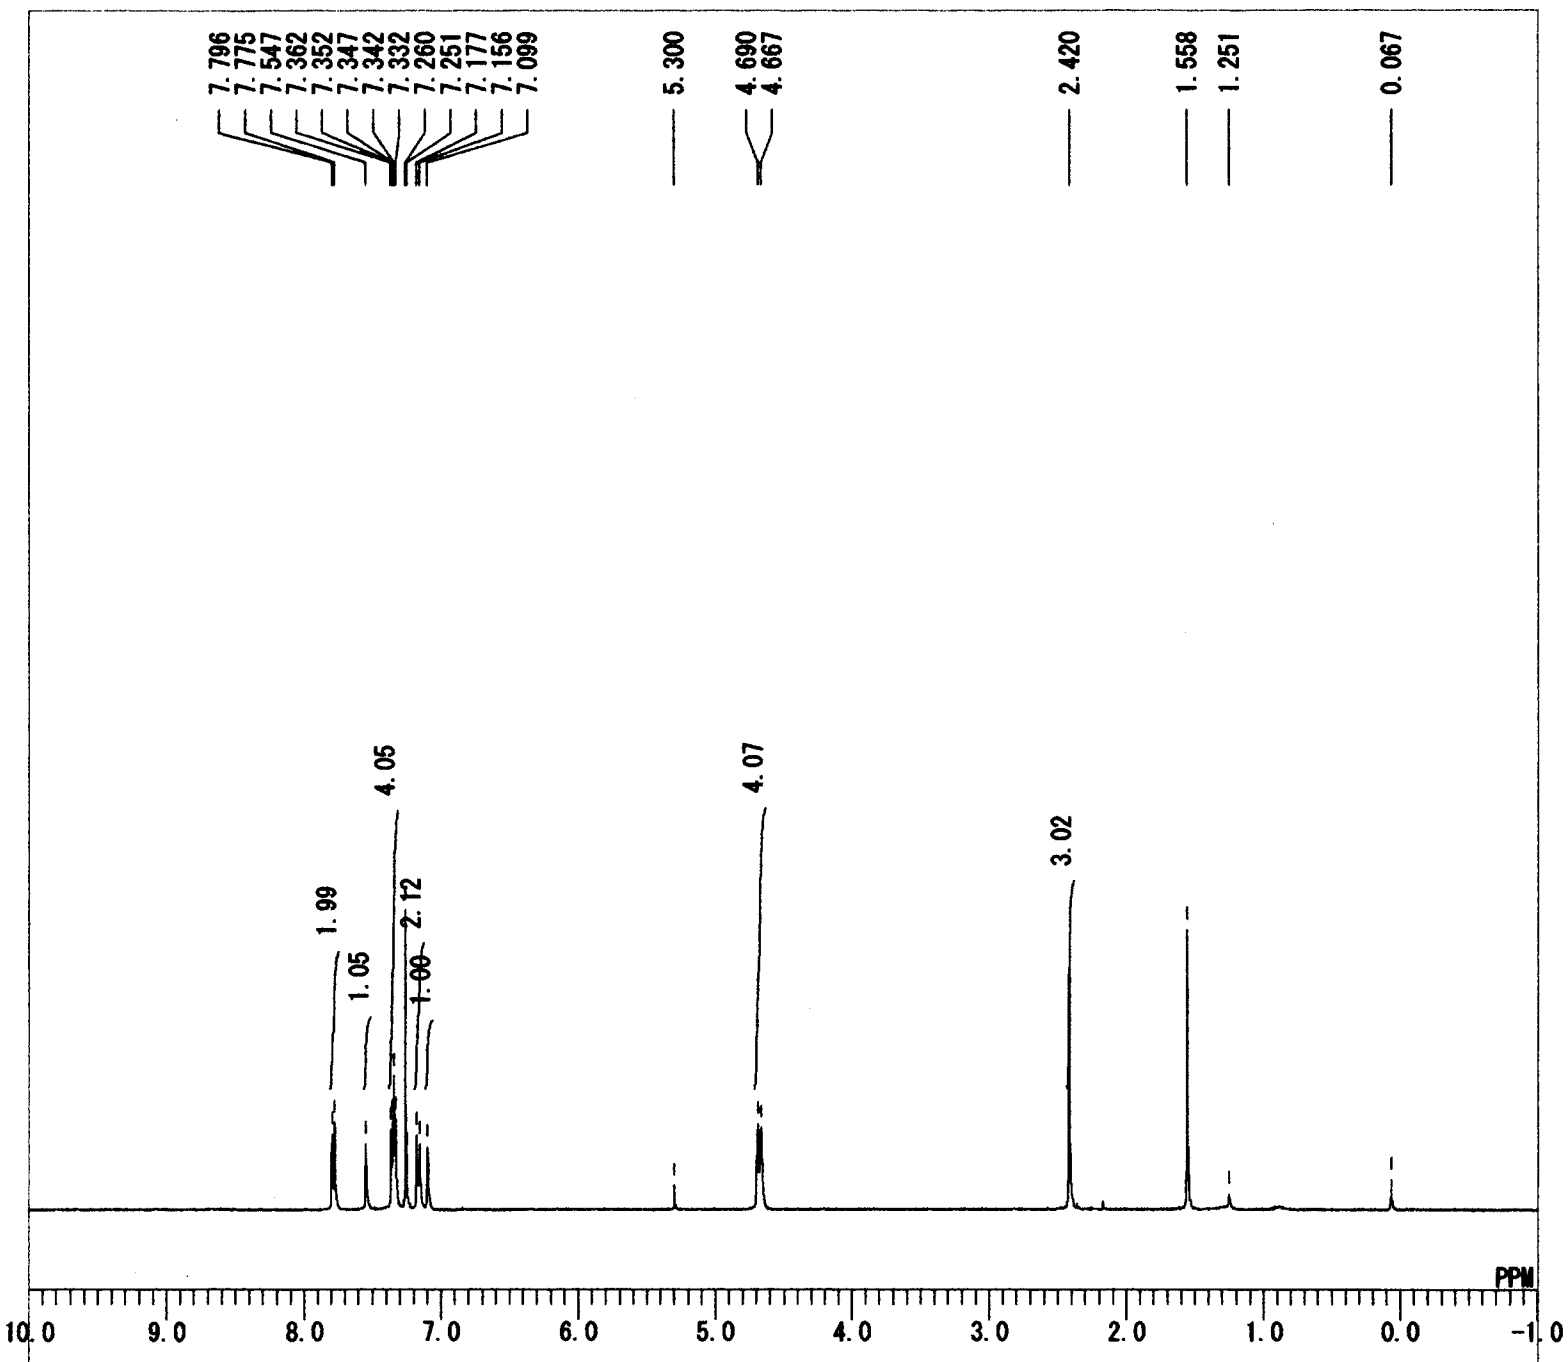

MENUF 1H  
 OBNUC 1H  
 OFR 399.65 MHz  
 OBSSET 135.40 KHz  
 OBFIN 24.90 Hz  
 PW1 5.20 usec  
 DEADT 72.40 usec  
 PREDL 0.20000 msec  
 IWT 1.0000 msec  
 POINT 16384  
 SPO 16384  
 TIMES 8  
 DUMMY 1  
 FREQU 7992.01 Hz  
 FLT 4000 Hz  
 DELAY 50.00 usec  
 ACQTM 2.0501 sec  
 PD 4.9500 sec  
 ADBIT 16  
 RGAIN 22  
 BF 0.10 Hz  
 T1 0.00  
 T2 0.00  
 T3 90.00  
 T4 100.00  
 EXMOD NON  
 EXPCM NON:Single.coupled:PW1\_ACQTM  
 IRNUC 1H  
 IFR 399.65 MHz  
 IRSET 136.90 KHz  
 IRFIN 97.50 Hz  
 IRRPW 45 usec  
 IRATN 511  
 DF FILE product-p-cl-N(1H).als  
 SF TH5ATFG2  
 LKSET 61.60 KHz  
 LKFIN 79.0 Hz  
 LKLEV 180  
 LGAIN 22  
 LKPHS 219  
 LKSIG 600  
 CSPED 12 Hz  
 FILDC  
 FILDF

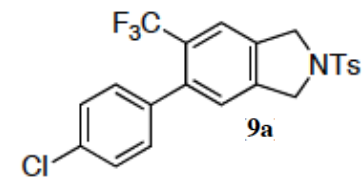

144.319  
140.449  
140.425  
140.211  
137.782  
136.317  
134.341  
133.649  
130.496  
130.480  
130.241  
128.990  
128.792  
128.496  
128.339  
127.870  
126.495  
125.754  
125.351  
122.626  
121.020  
120.963  
120.913  
120.856  
77.634  
77.321  
77.000

53.734  
53.644  
21.783  
1.300

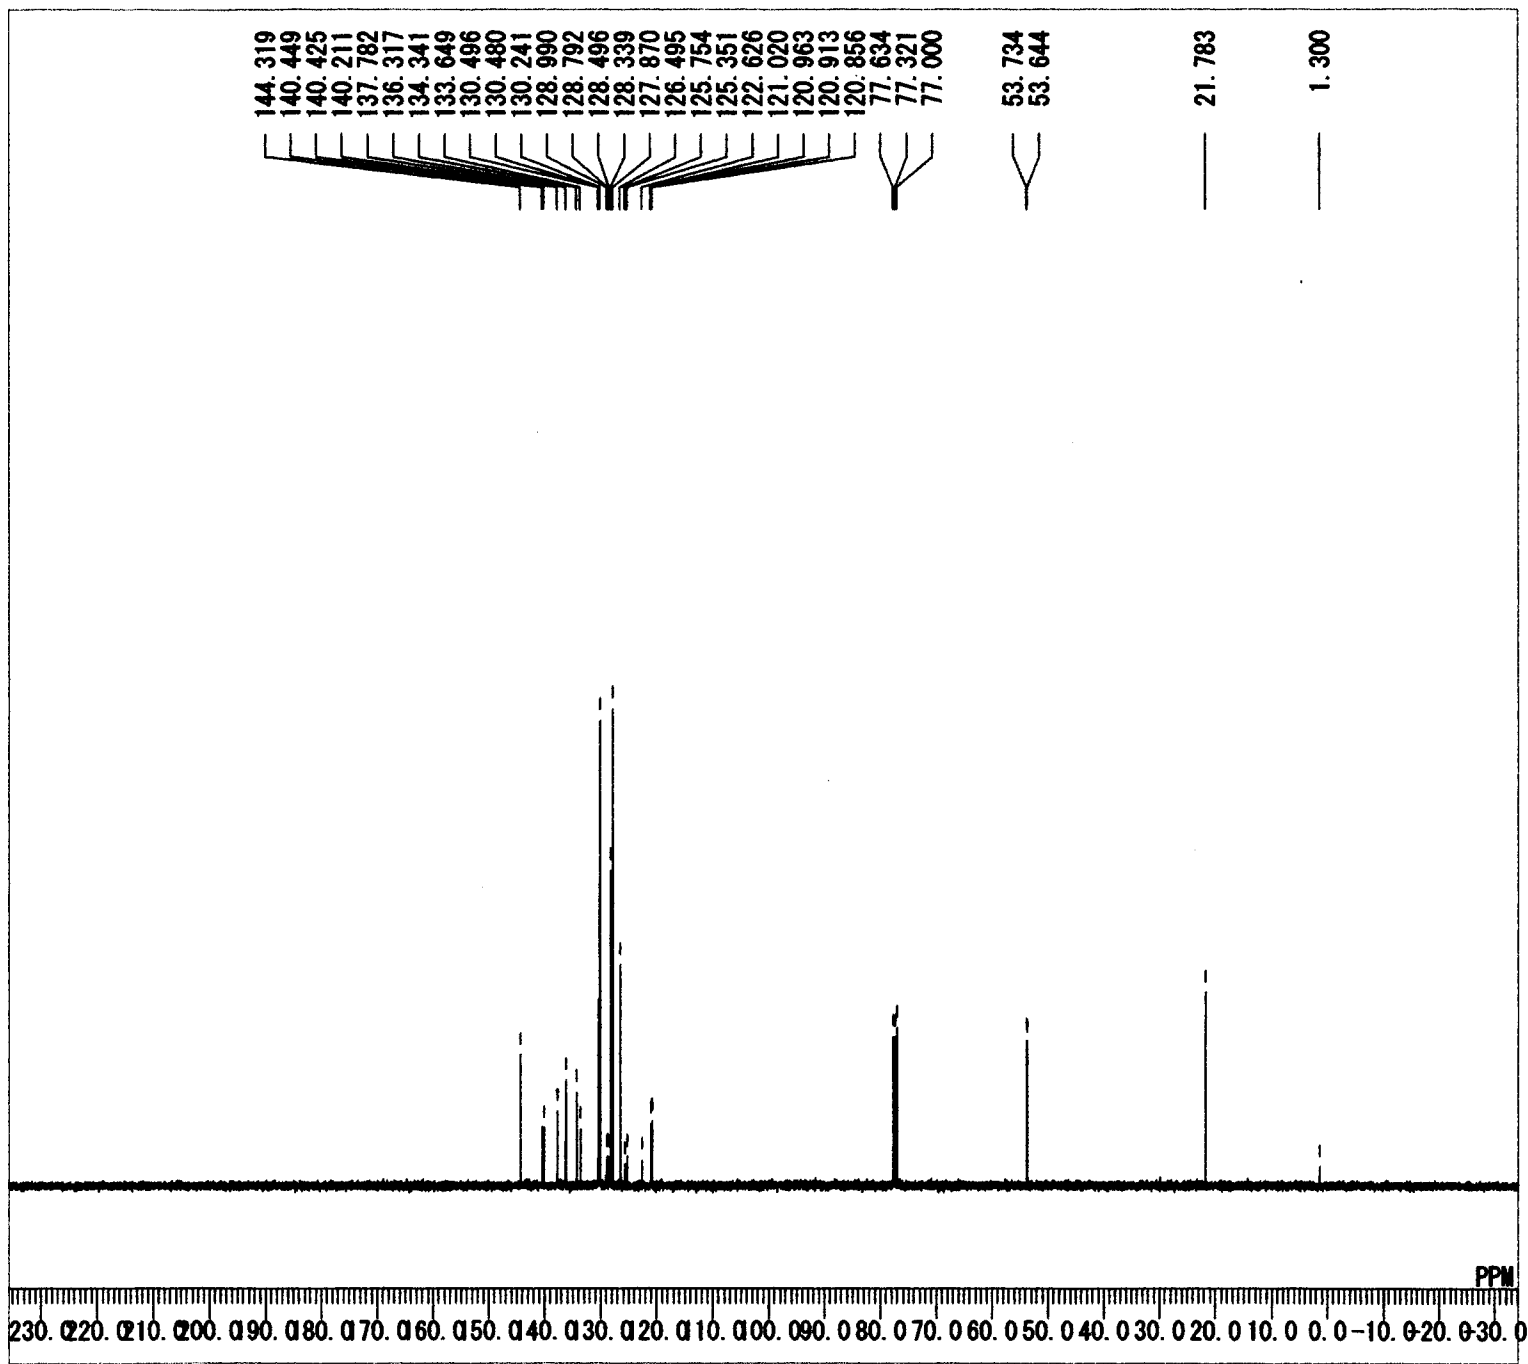

MENUF 13C  
OBNUC 13C  
OFR 100.40 MHz  
OBSET 125.00 KHz  
OBFIN 10500.00 Hz  
PW1 6.00 usec  
DEADT 19.10 usec  
PREDL 0.20000 msec  
IWT 1.0000 msec  
POINT 32768  
SPO 32768  
TIMES 256  
DUMMY 1  
FREQU 27118.64 Hz  
FLT 13550 Hz  
DELAY 14.80 usec  
ACQTM 1.2083 sec  
PD 1.7920 sec  
ADBIT 16  
RGAIN 25  
BF 0.10 Hz  
T1 0.00  
T2 0.00  
T3 90.00  
T4 100.00  
EXMOD BCM  
EXPCM Bi level. complete. decoupling:  
IRNUC 1H  
IFR 399.65 MHz  
IRSET 124.00 KHz  
IRFIN 10500.00 Hz  
IRRPW 45 usec  
IRATN 511  
DFILE product-p-Cl-N(13C).als  
SF TH5ATFG2  
LKSET 61.60 KHz  
LKFIN 79.0 Hz  
LKLEV 180  
LGAIN 24  
LKPHS 221  
LKSIG 960  
CSPED 14 Hz  
FILDC  
FILDF

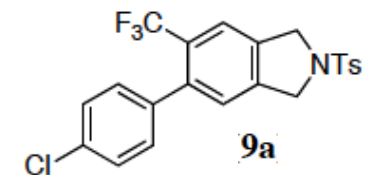

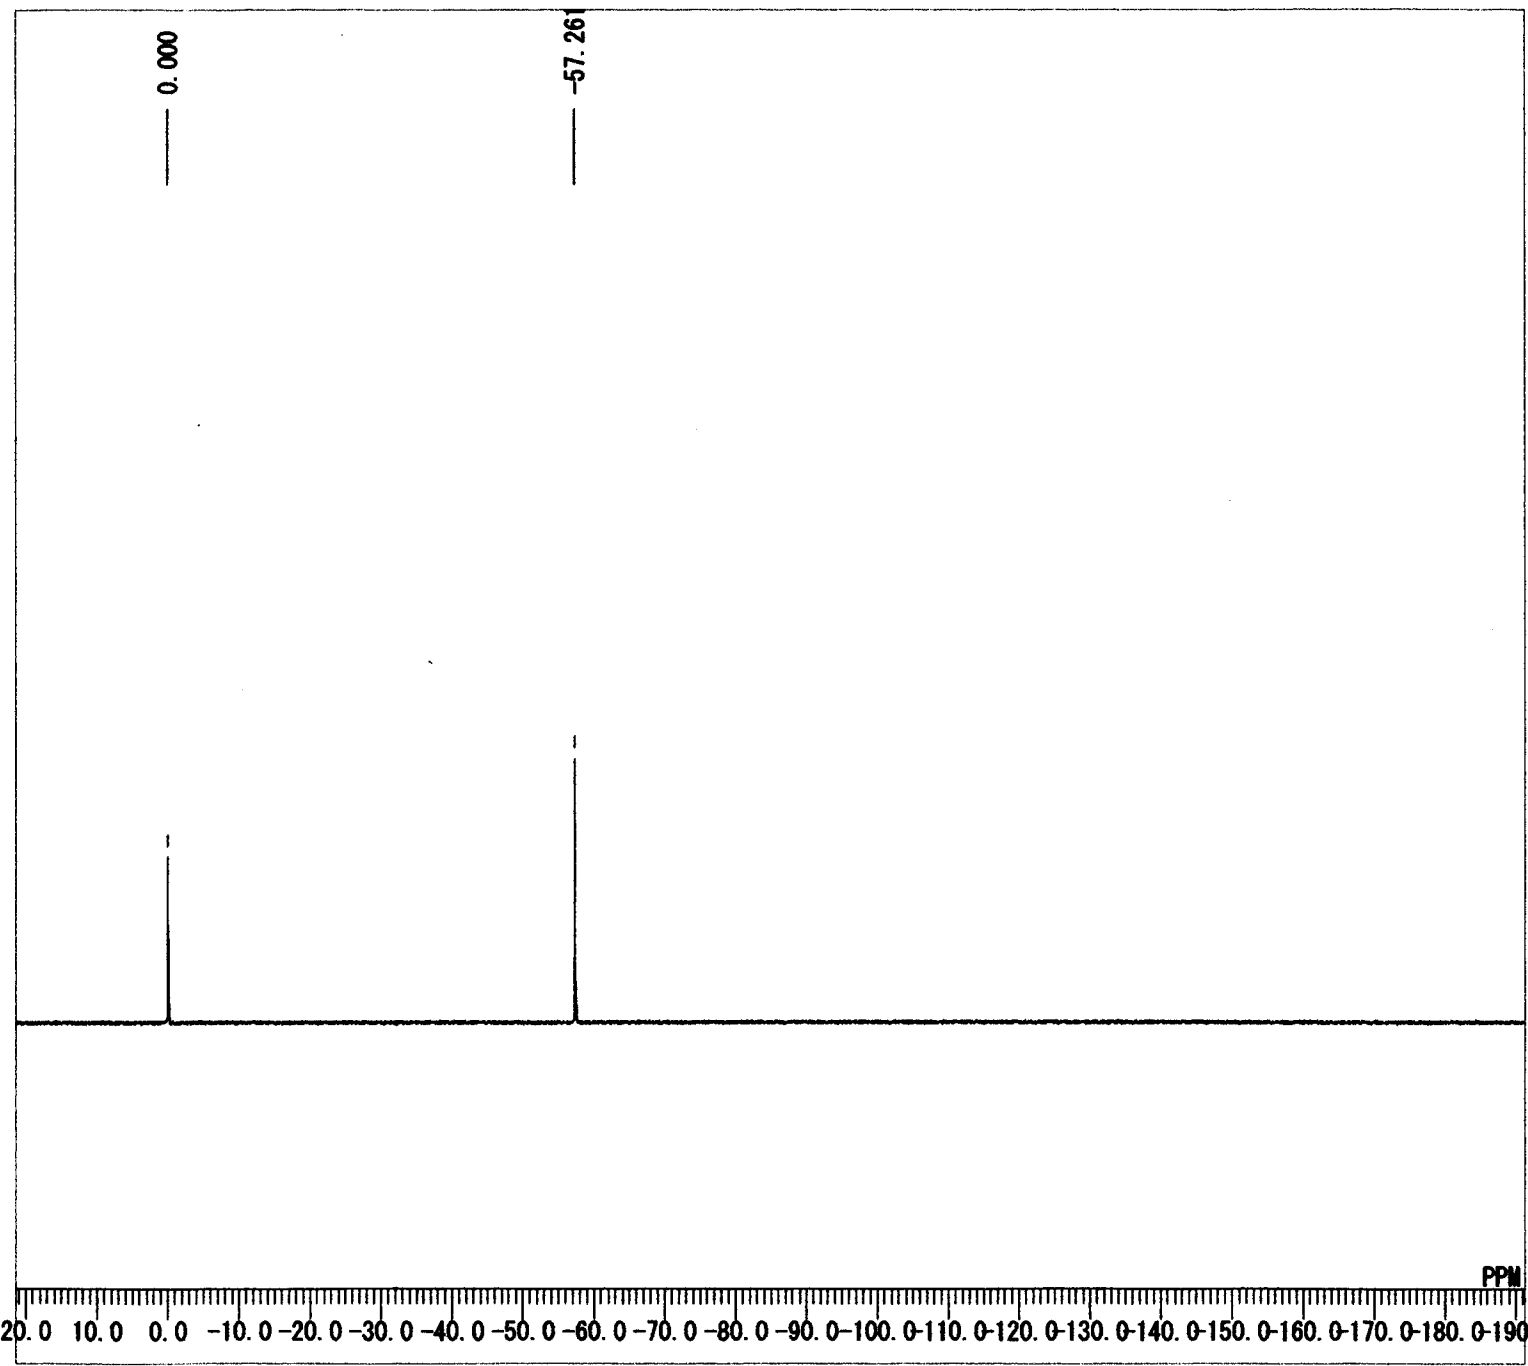

```

MENUF 19F
OBNUC 19F
OFR 376.05 MHz
OBSET 139.60 KHz
OBFIN 36.10 Hz
PW1 6.00 usec
DEADT 10.00 usec
PREDL 0.20000 msec
IWT 1.0000 msec
POINT 32768
SPO 32768
TIMES 16
DUMMY 1
FREQU 80000.00 Hz
FLT 40000 Hz
DELAY 5.00 usec
ACQTM 0.4096 sec
PD 4.9500 sec
ADBIT 16
RGAIN 13
BF 5.00 Hz
T1 0.00
T2 0.00
T3 90.00
T4 100.00
EXMOD NON
EXPCM NON:Single.coupled:PW1_ACQTM
IRNUC 1H
IFR 399.65 MHz
IRSET 124.00 KHz
IRFIN 10500.00 Hz
IRRPW 45 usec
IRATN 511
DFILE product-p-Cl-N(19F).als
SF TH5ATFG2
LKSET 61.60 KHz
LKFIN 79.0 Hz
LKLEV 180
LGAIN 24
LKPHS 219
LKSIG 658
CSPED 11 Hz
FILDC
FILDF

```

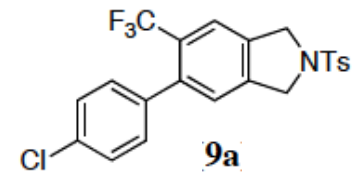

7.546  
7.542  
7.528  
7.524  
7.436  
7.420  
7.417  
7.414  
7.399  
7.383  
7.380  
7.366  
7.260

4.180  
4.174  
4.143  
4.138  
3.885  
3.879  
3.848  
3.842

2.455  
2.449  
2.443  
1.832  
1.556

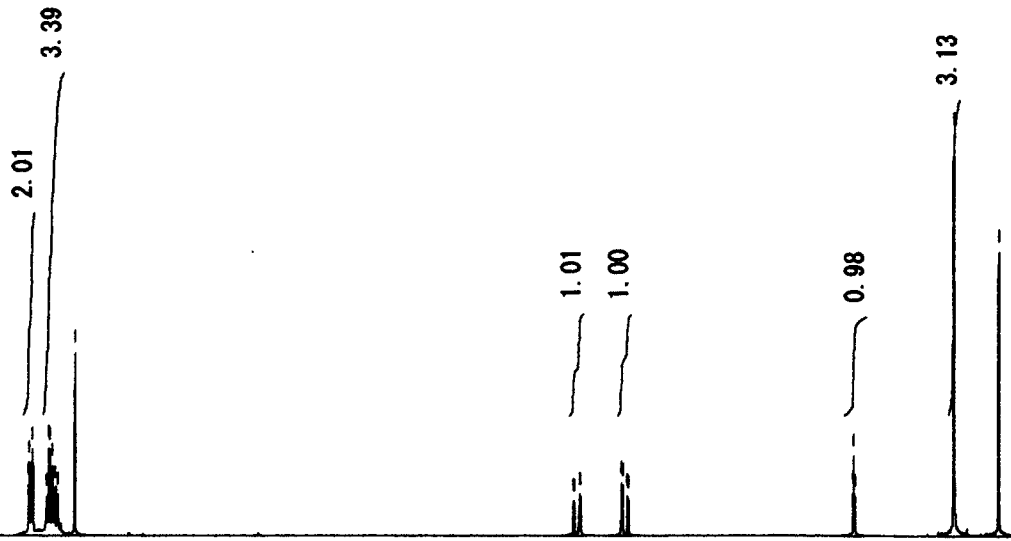

MENUF 1H  
OBNUC 1H  
OFR 399.65 MHz  
OBSET 135.40 KHz  
OBF IN 24.90 Hz  
PW1 5.80 usec  
DEADT 72.10 usec  
PREDL 0.20000 msec  
IWT 1.0000 msec  
POINT 16384  
SPO 16384  
TIMES 8  
DUMMY 1  
FREQU 7992.01 Hz  
FLT 4000 Hz  
DELAY 50.00 usec  
ACQTM 2.0501 sec  
PD 4.9500 sec  
ADBIT 16  
RGAIN 19  
BF 0.10 Hz  
T1 0.00  
T2 0.00  
T3 90.00  
T4 100.00  
EXMOD NON  
EXPCM NON:Single.coupled:PW1\_ACQTM  
IRNUC 1H  
IFR 399.65 MHz  
IRSET 136.90 KHz  
IRFIN 97.50 Hz  
IRRPW 45 usec  
IRATN 511  
DFILE CF3-Diyne(Ph, Me)-H(1H).als  
SF TH5ATFG2  
LKSET 61.60 KHz  
LKFIN 79.0 Hz  
LKLEV 180  
LGAIN 24  
LKPHS 249  
LKSIG 1241  
CSPED 12 Hz  
FILDC  
FILDF

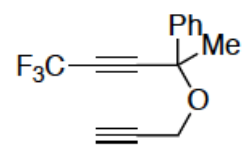

10A

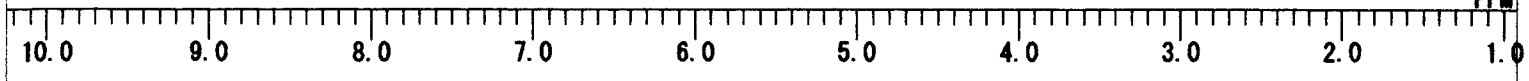

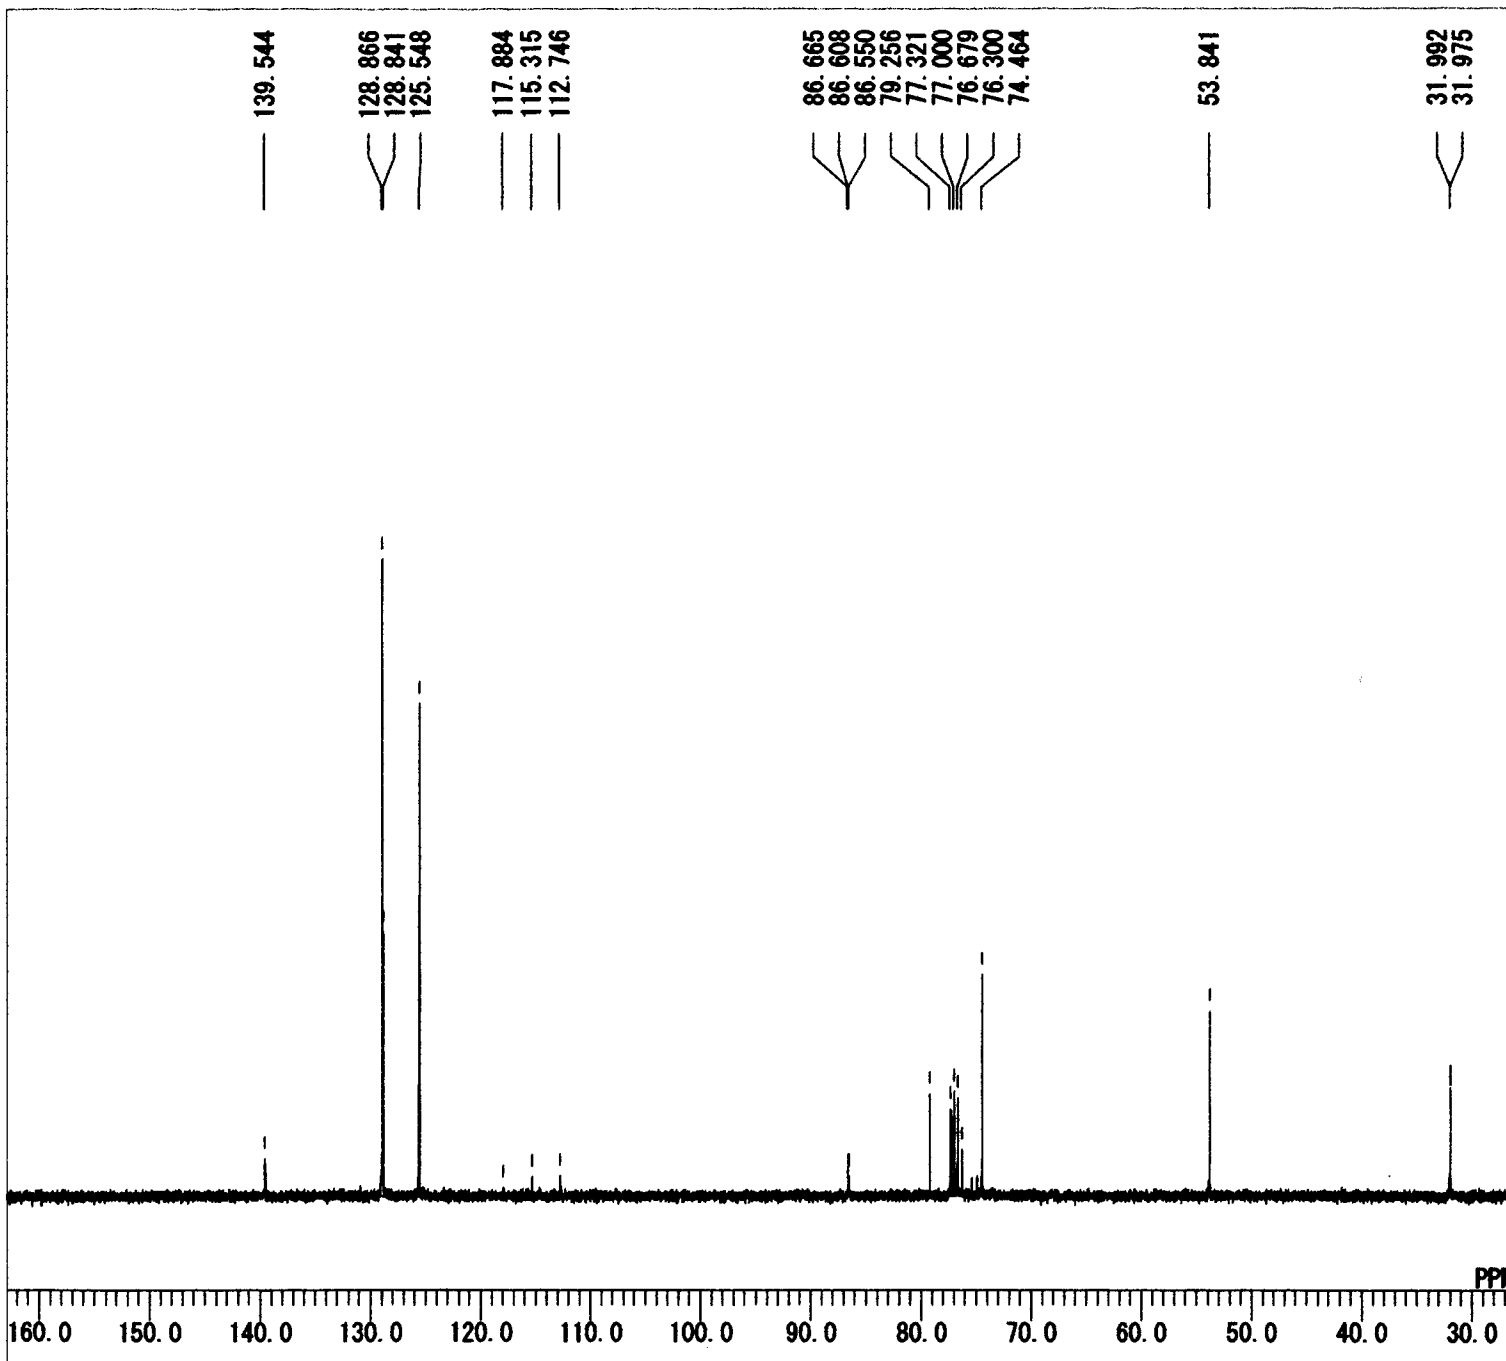

```

MENUF 13C
OBNUC 13C
OFR 100.40 MHz
OBSET 125.00 KHz
OBFIN 10500.00 Hz
PW1 6.00 usec
DEADT 19.10 usec
PREDL 0.20000 msec
IWT 1.0000 msec
POINT 32768
SPO 32768
TIMES 256
DUMMY 1
FREGU 27118.64 Hz
FLT 13550 Hz
DELAY 14.80 usec
ACQTM 1.2083 sec
PD 1.7920 sec
ADBIT 16
RGAIN 25
BF 0.10 Hz
T1 0.00
T2 0.00
T3 90.00
T4 100.00
EXMOD BCM
EXPCM Bi level. complete. decoupling:
IRNUC 1H
IFR 399.65 MHz
IRSET 124.00 KHz
IRFIN 10500.00 Hz
IRRPW 45 usec
IRATN 511
DFILE CF3-Diyne (Ph, Me)-H(13C). als
SF TH5ATFG2
LKSET 61.60 KHz
LKFIN 79.0 Hz
LKLEV 180
LGAIN 24
LKPHS 249
LKSIG 710
CSPED 10 Hz
FILDC
FILDF

```

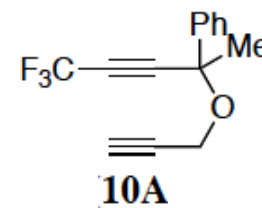

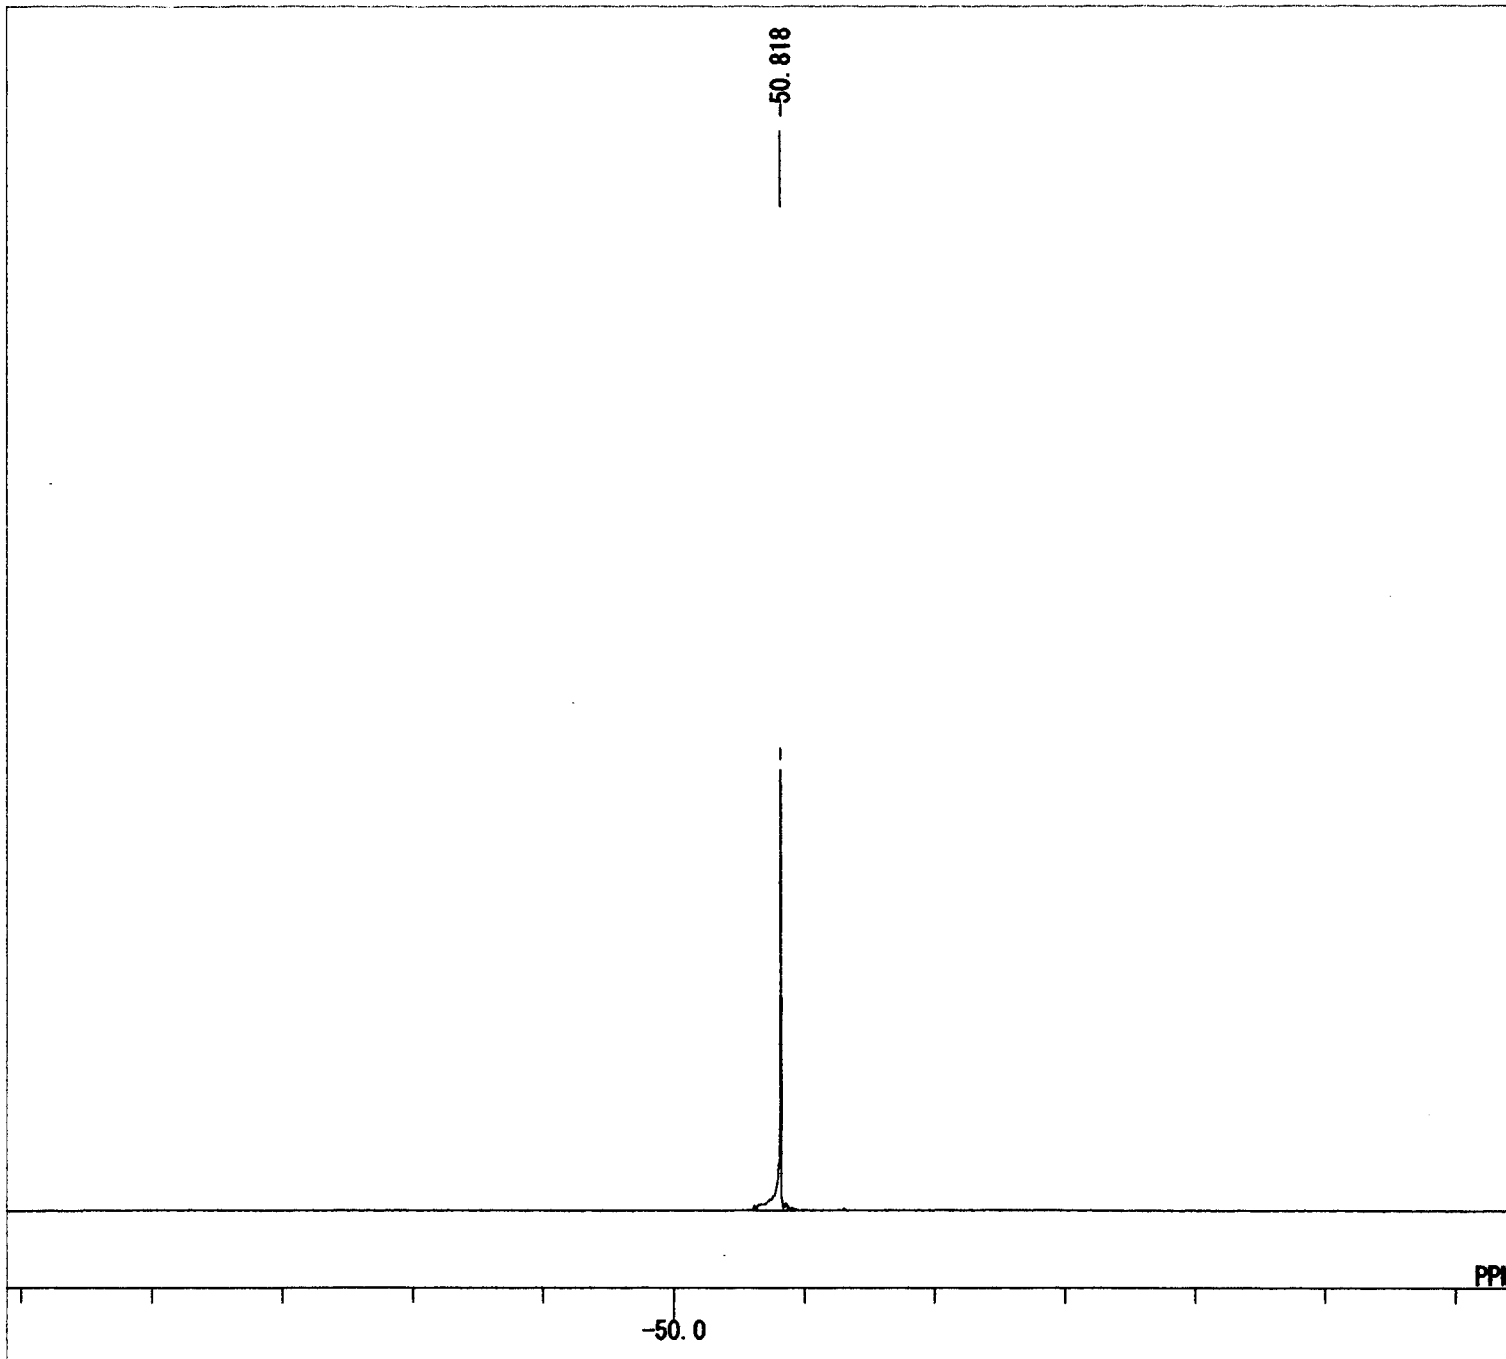

|       |                               |
|-------|-------------------------------|
| MENUF | 19F                           |
| OBNUC | 19F                           |
| OFR   | 376.05 MHz                    |
| OBSET | 139.60 KHz                    |
| OBFIN | 36.10 Hz                      |
| PW1   | 6.00 usec                     |
| DEADT | 10.00 usec                    |
| PREDL | 0.20000 msec                  |
| IWT   | 1.0000 msec                   |
| POINT | 32768                         |
| SPO   | 32768                         |
| TIMES | 16                            |
| DUMMY | 1                             |
| FREQU | 80000.00 Hz                   |
| FLT   | 40000 Hz                      |
| DELAY | 5.00 usec                     |
| ACQTM | 0.4096 sec                    |
| PD    | 4.9500 sec                    |
| ADBIT | 16                            |
| RGAIN | 14                            |
| BF    | 0.10 Hz                       |
| T1    | 0.00                          |
| T2    | 0.00                          |
| T3    | 90.00                         |
| T4    | 100.00                        |
| EXMOD | NON                           |
| EXPCM | NON:Single.coupled:PW1_ACQTM. |
| IRNUC | 1H                            |
| IFR   | 399.65 MHz                    |
| IRSET | 124.00 KHz                    |
| IRFIN | 10500.00 Hz                   |
| IRRPW | 45 usec                       |
| IRATN | 511                           |
| DFILE | CF3-Diyne(Ph, Me)-H(19F).als  |
| SF    | TH5ATFG2                      |
| LKSET | 61.60 KHz                     |
| LKFIN | 79.0 Hz                       |
| LKLEV | 180                           |
| LGAIN | 23                            |
| LKPHS | 249                           |
| LKSIG | 647                           |
| CSPED | 11 Hz                         |
| FILDC |                               |
| FILDF |                               |

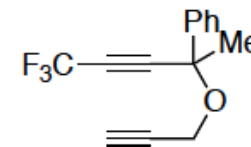

10A

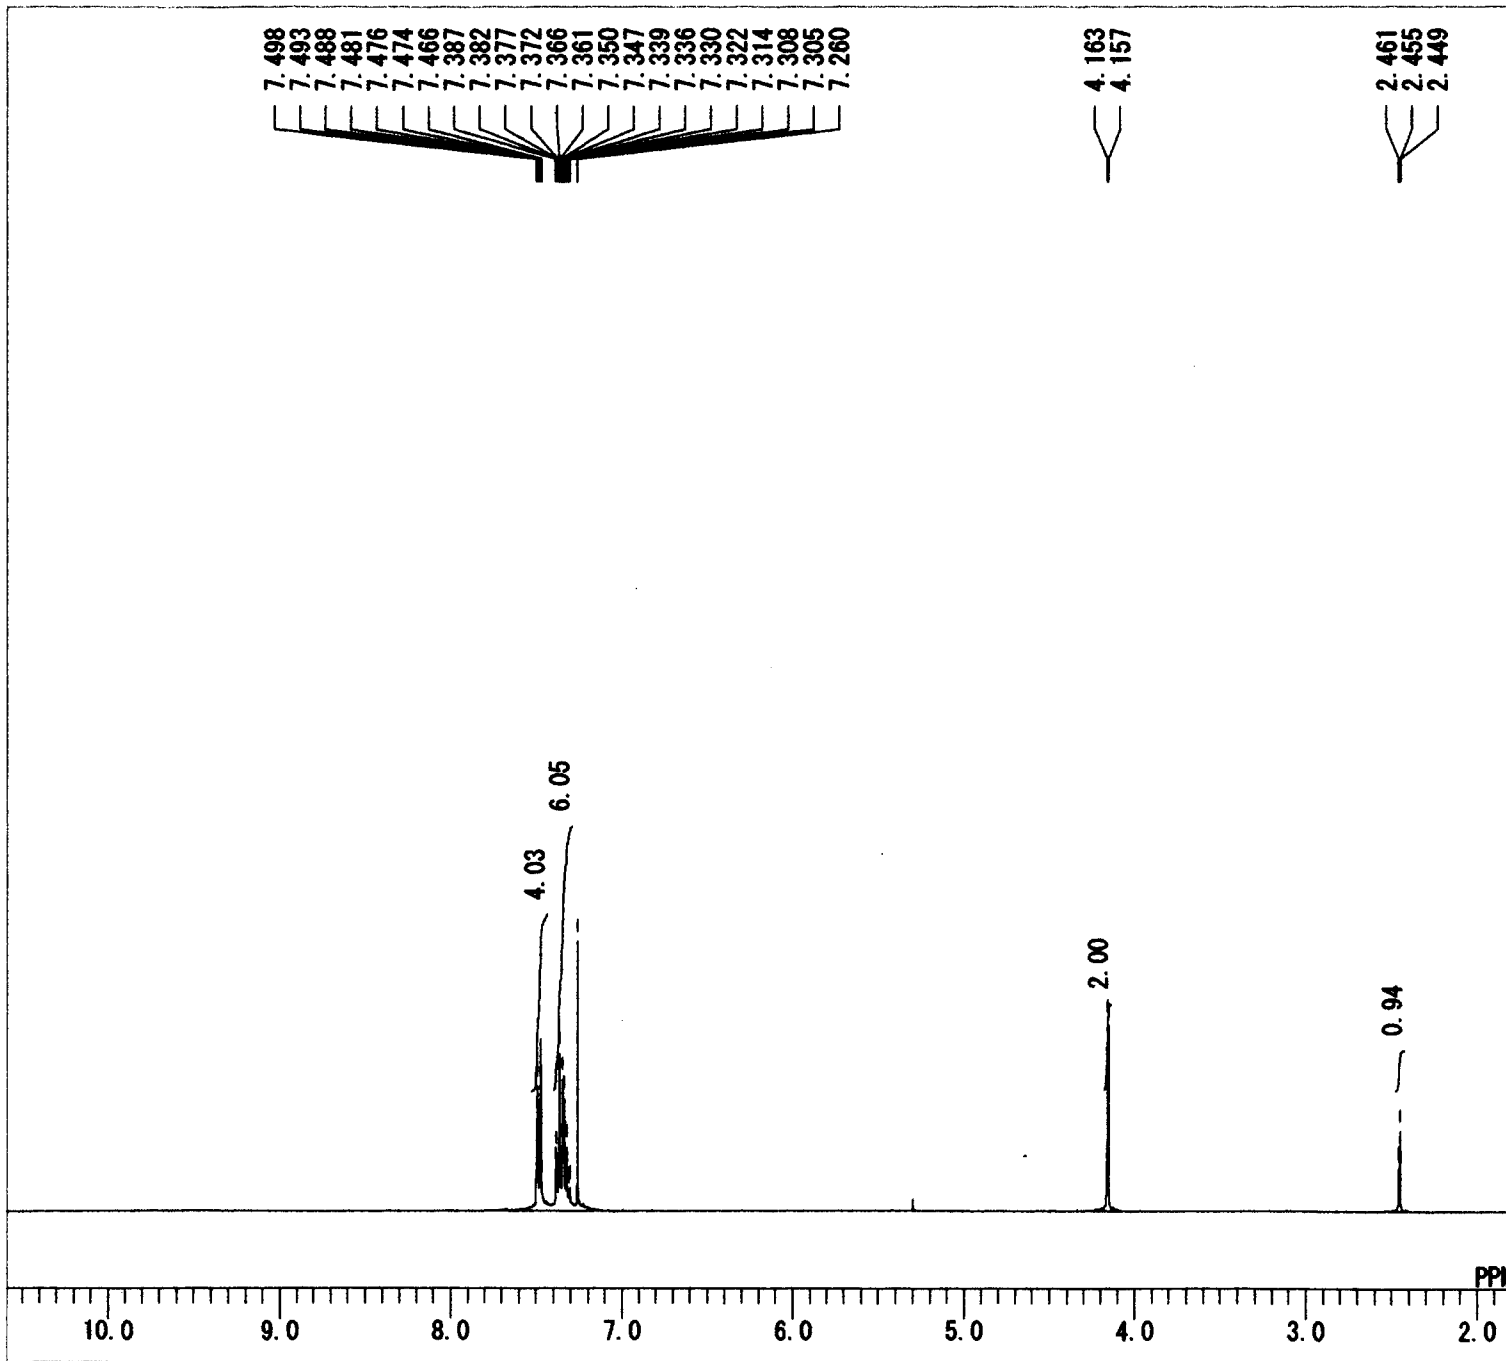

MENUF 1H  
 OBNUC 1H  
 OFR 399.65 MHz  
 OBSET 135.40 KHz  
 OBF IN 24.90 Hz  
 PW1 5.80 usec  
 DEADT 72.10 usec  
 PREDL 0.20000 msec  
 IWT 1.0000 msec  
 POINT 16384  
 SPO 16384  
 TIMES 8  
 DUMMY 1  
 FREQU 7992.01 Hz  
 FLT 4000 Hz  
 DELAY 50.00 usec  
 ACQTM 2.0501 sec  
 PD 4.9500 sec  
 ADBIT 16  
 RGAIN 21  
 BF 0.10 Hz  
 T1 0.00  
 T2 0.00  
 T3 90.00  
 T4 100.00  
 EXMOD NON  
 EXPCM NON:Single.coupled:PW1\_ACQTM  
 IRNUC 1H  
 IFR 399.65 MHz  
 IRSET 136.90 KHz  
 IRFIN 97.50 Hz  
 IRRPW 45 usec  
 IRATN 511  
 DF1LE CF3-Diyne (Ph, Ph)-H(1H). als  
 SF TH5ATFG2  
 LKSET 61.60 KHz  
 LKFIN 79.0 Hz  
 LKLEV 180  
 LGAIN 23  
 LKPHS 249  
 LKSIG 874  
 CSPED 14 Hz  
 FILDC  
 FILDF

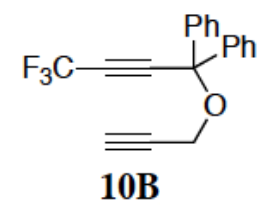



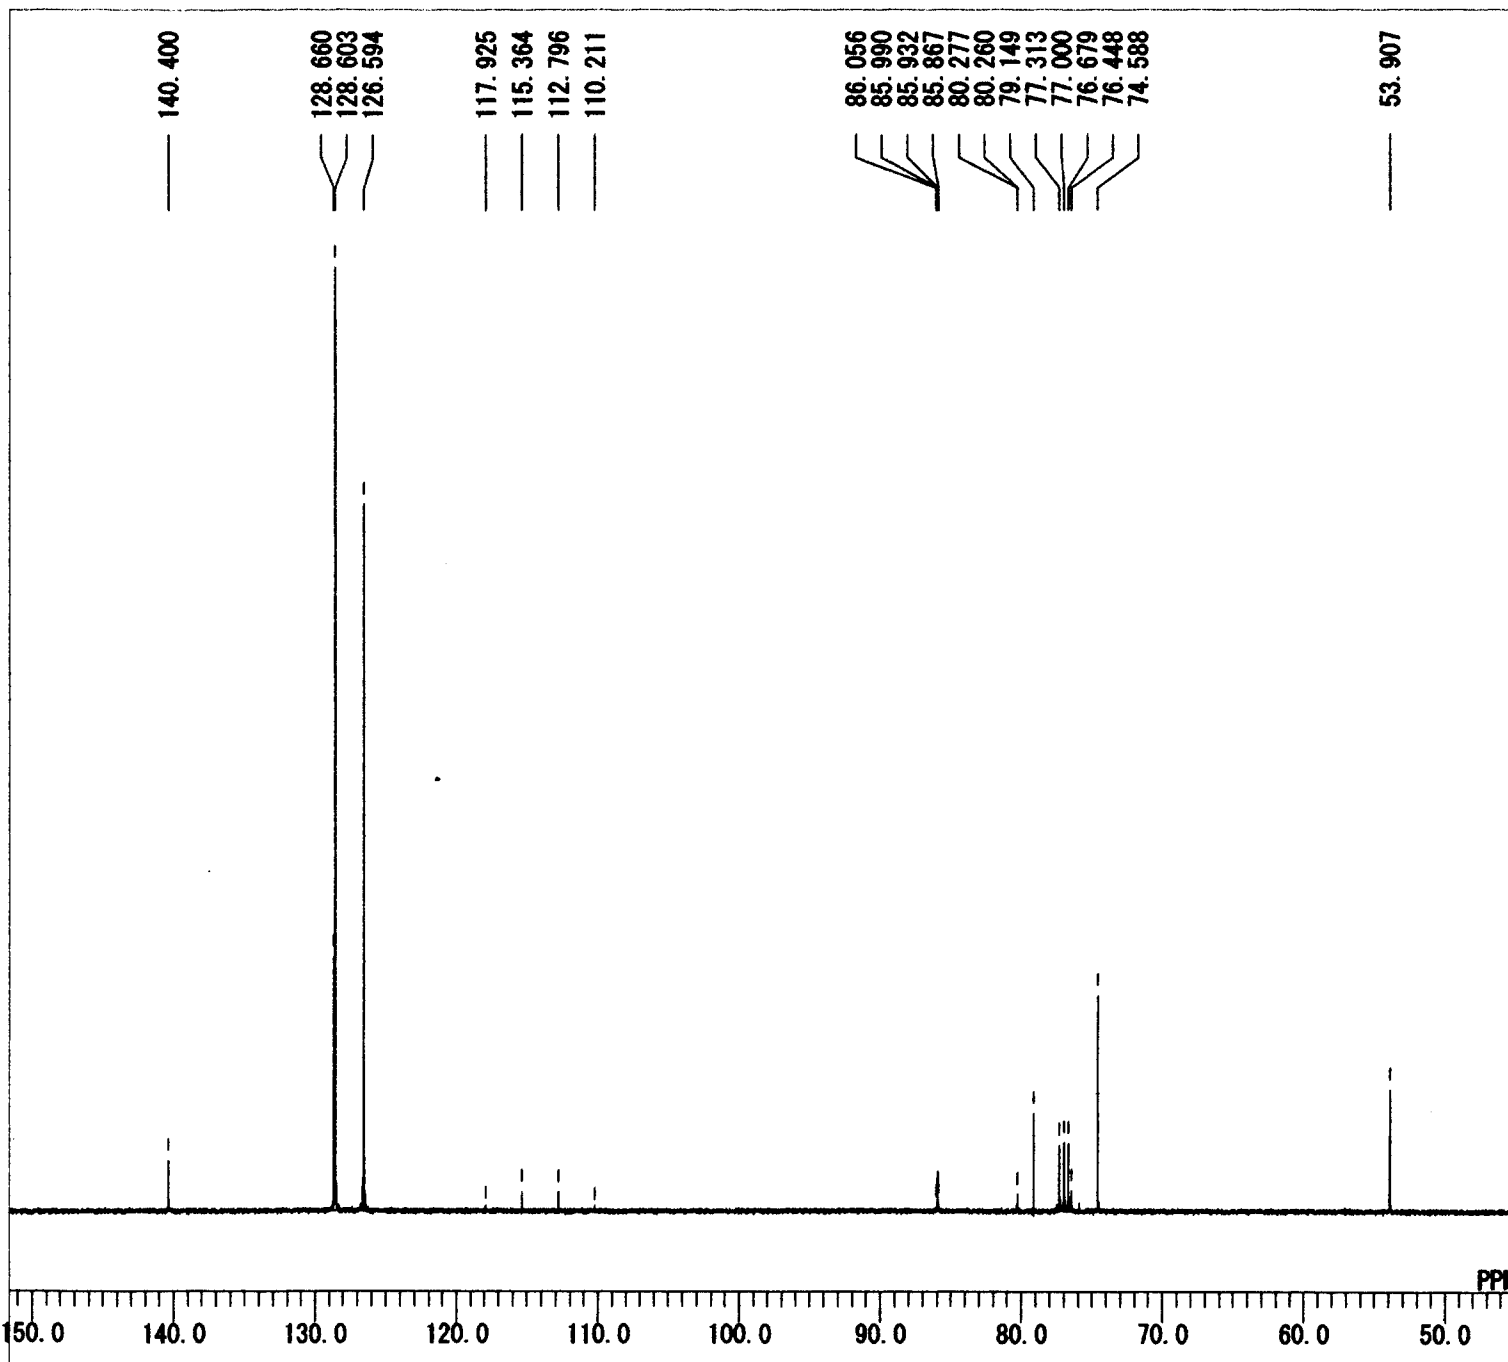

MENUF 13C  
 OBNUC 13C  
 OFR 100.40 MHz  
 OBSET 125.00 KHz  
 OBF IN 10500.00 Hz  
 PW1 6.00 usec  
 DEADT 19.10 usec  
 PREDL 0.20000 msec  
 IWT 1.0000 msec  
 POINT 32768  
 SPO 32768  
 TIMES 256  
 DUMMY 1  
 FREQU 27118.64 Hz  
 FLT 13550 Hz  
 DELAY 14.80 usec  
 ACQTM 1.2083 sec  
 PD 1.7920 sec  
 ADBIT 16  
 RGA IN 24  
 BF 0.10 Hz  
 T1 0.00  
 T2 0.00  
 T3 90.00  
 T4 100.00  
 EXMOD BCM  
 EXPCM Bilevel. complete. decoupling:  
 IRNUC 1H  
 IFR 399.65 MHz  
 IRSET 124.00 KHz  
 IRFIN 10500.00 Hz  
 IRRPW 45 usec  
 IRATN 511  
 DFILE CF3-Diyne (Ph, Ph)-H(13C). als  
 SF TH5ATFG2  
 LKSET 61.60 KHz  
 LKFIN 79.0 Hz  
 LKLEV 180  
 LGAIN 23  
 LKPHS 249  
 LKSIG 695  
 CSPED 13 Hz  
 FILDC  
 FILDF

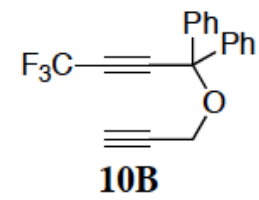

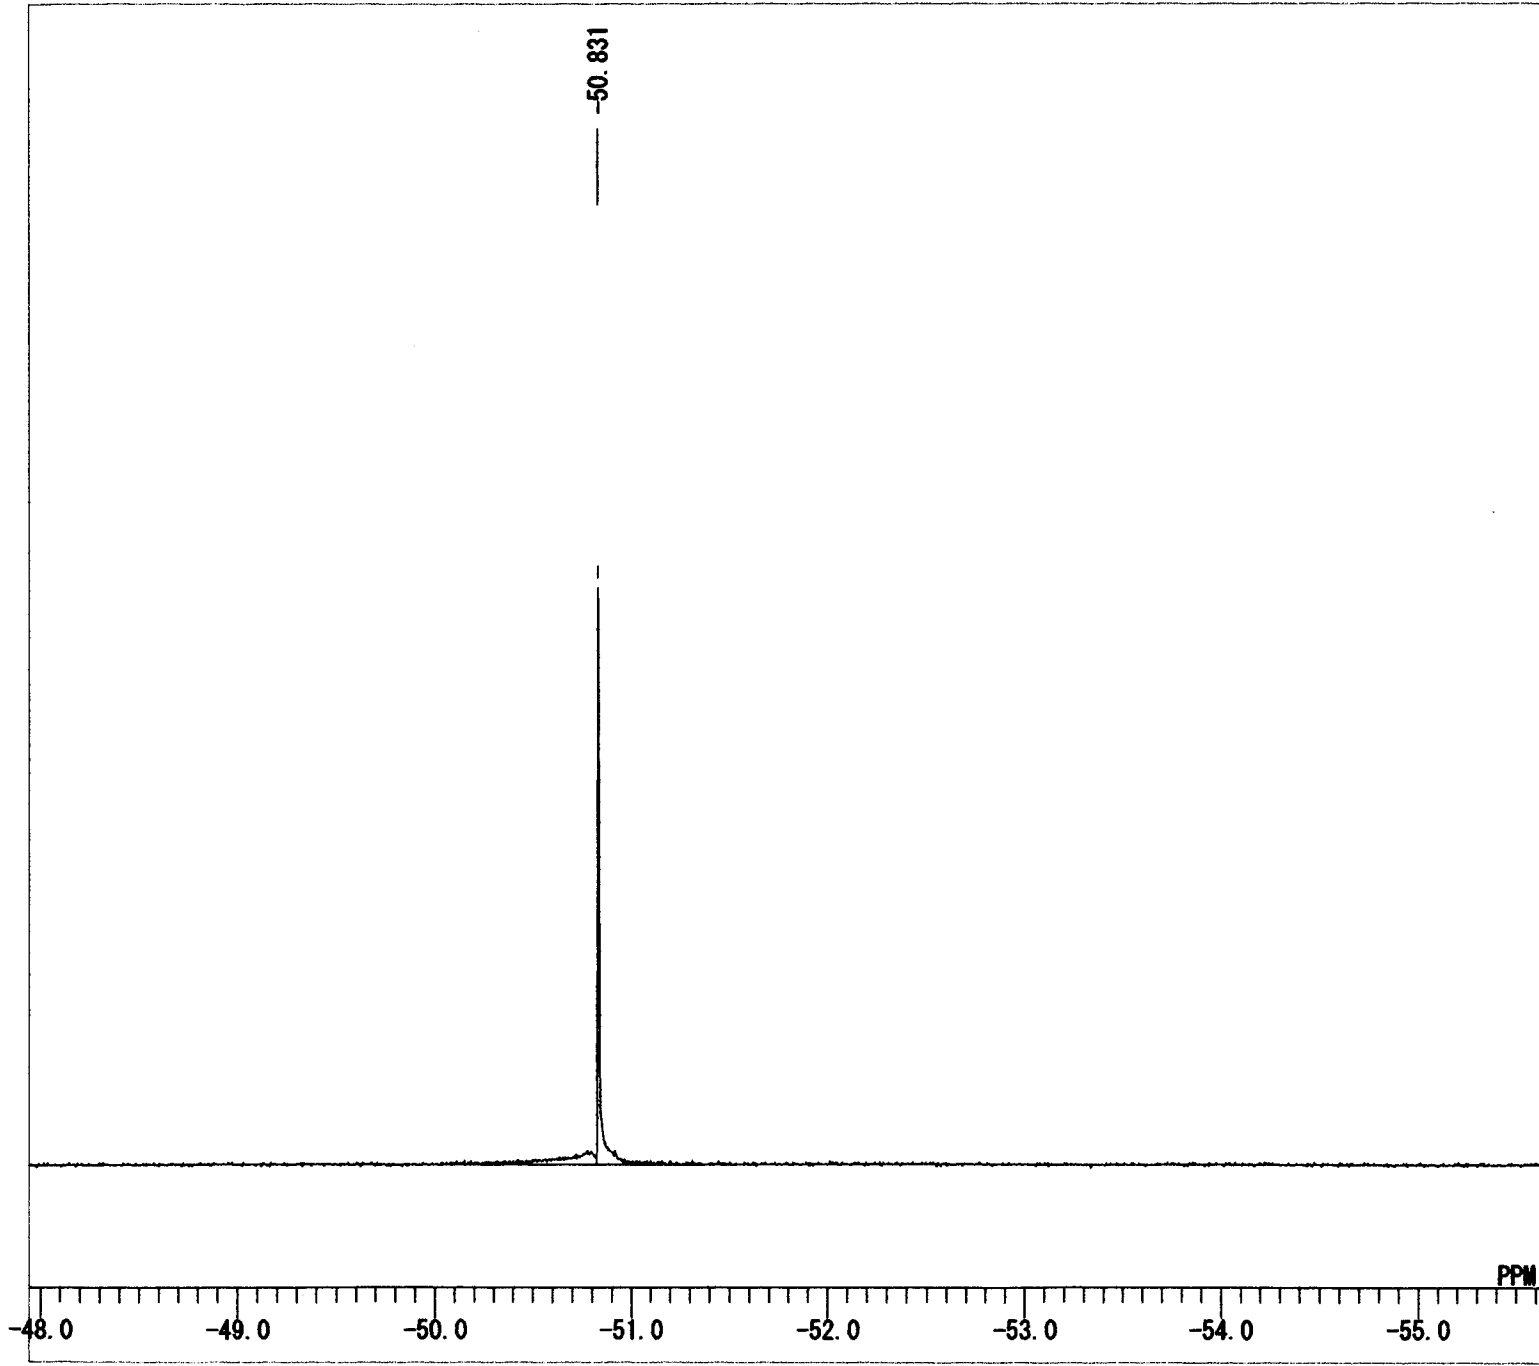

```

MENUF 19F
OBNUC 19F
OFR      376.05 MHz
OBSET    139.60 KHz
OBFIN    36.10 Hz
PW1      6.00 usec
DEADT    10.00 usec
PREDL    0.20000 msec
IWT      1.0000 msec
POINT    32768
SPO      32768
TIMES    16
DUMMY    1
FREQU    80000.00 Hz
FLT      40000 Hz
DELAY    5.00 usec
ACQTM    0.4096 sec
PD       4.9500 sec
ADBIT    16
RGAIN    14
BF       0.10 Hz
T1       0.00
T2       0.00
T3       90.00
T4       100.00
EXMOD    NON
EXPCM    NON:Single.coupled:PW1_ACQTM
IRNUC    1H
IFR      399.65 MHz
IRSET    124.00 KHz
IRFIN    10500.00 Hz
IRRPW    45 usec
IRATN    511
DFILE    CF3-Diyne (Ph, Ph)-H(19F).als
SF       TH5ATFG2
LKSET    61.60 KHz
LKFIN    79.0 Hz
LKLEV    180
LGAIN    24
LKPHS    249
LKSIG    559
CSPED    13 Hz
FILDC
FILDF

```

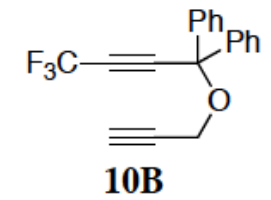

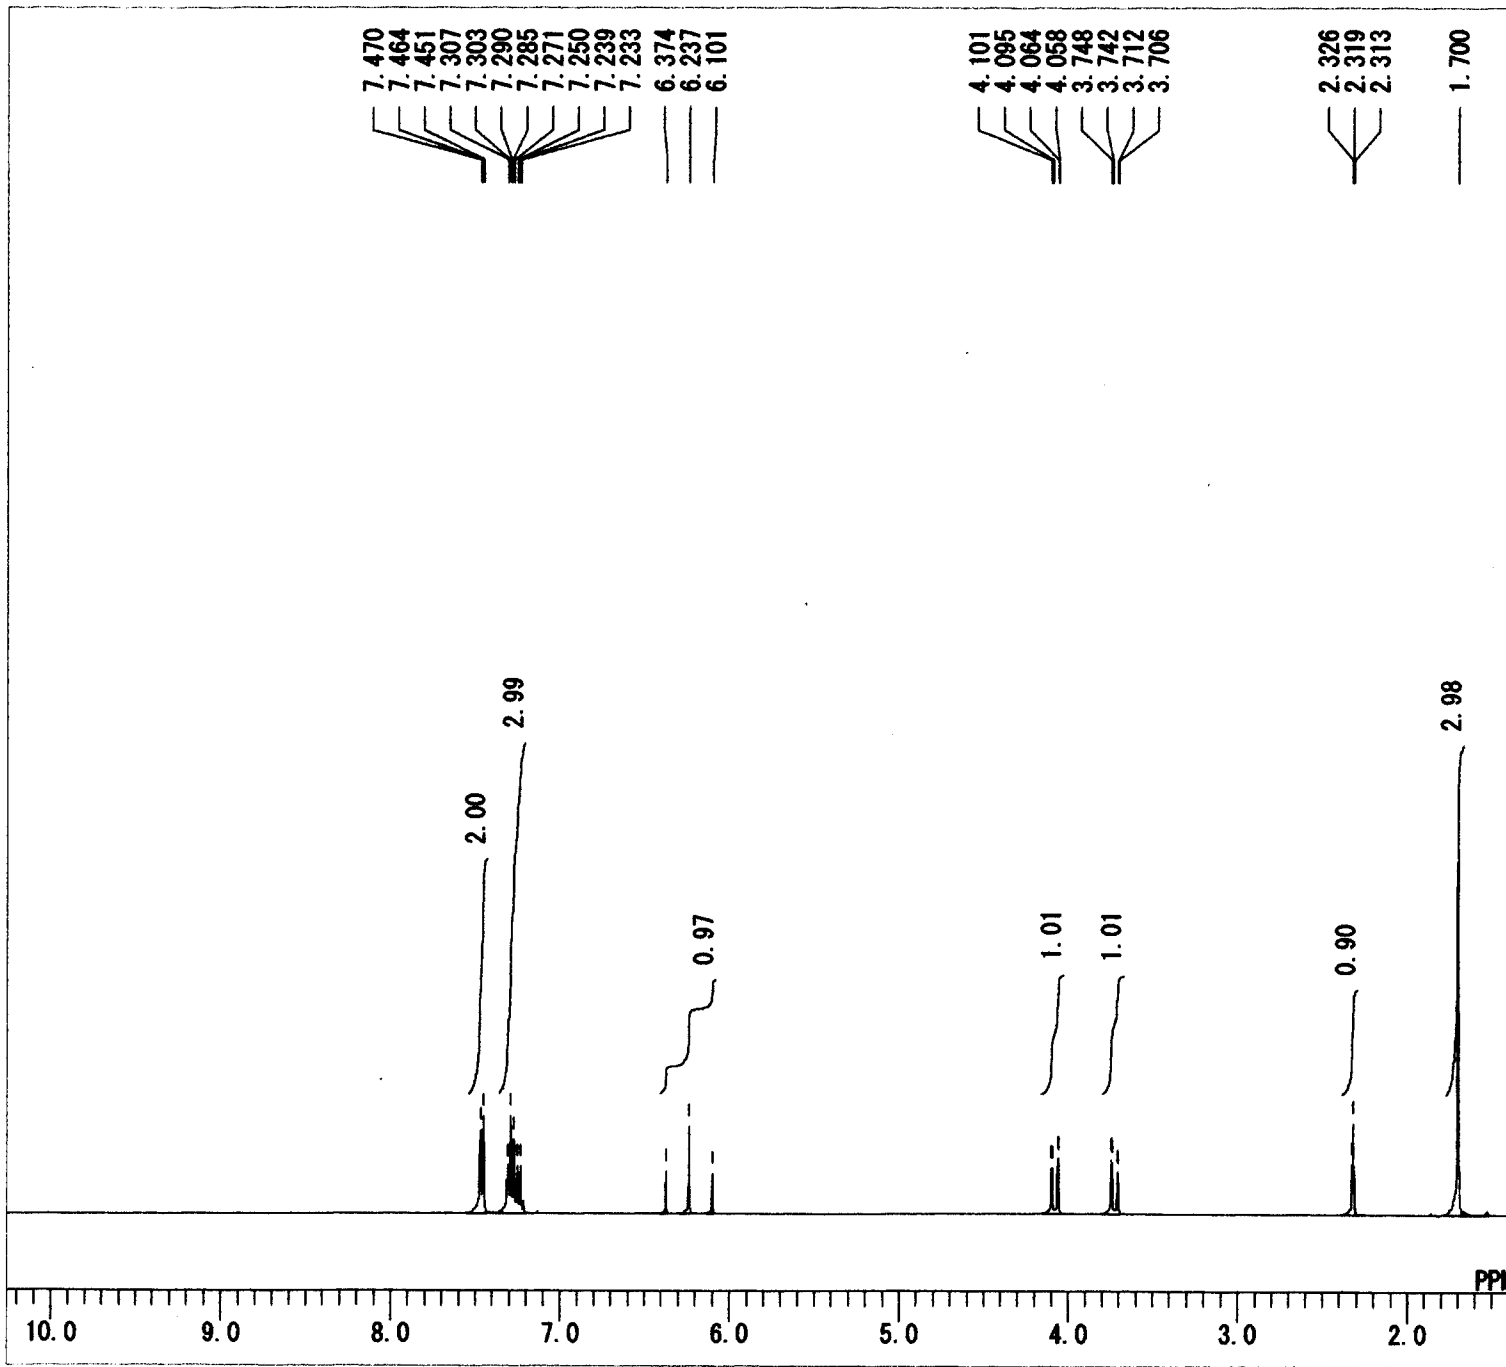

MENUF 1H  
 OBNUC 1H  
 OFR 399.65 MHz  
 OBSET 135.40 KHz  
 OBFIN 24.90 Hz  
 PW1 5.80 usec  
 DEADT 72.10 usec  
 PREDL 0.20000 msec  
 IWT 1.0000 msec  
 POINT 16384  
 SPO 16384  
 TIMES 8  
 DUMMY 1  
 FREQU 7992.01 Hz  
 FLT 4000 Hz  
 DELAY 50.00 usec  
 ACQTM 2.0501 sec  
 PD 4.9500 sec  
 ADBIT 16  
 RGAIN 8  
 BF 0.10 Hz  
 T1 0.00  
 T2 0.00  
 T3 90.00  
 T4 100.00  
 EXMOD NON  
 EXPCM NON:Single.coupled:PW1\_ACQTM  
 IRNUC 1H  
 IFR 399.65 MHz  
 IRSET 136.90 KHz  
 IRFIN 97.50 Hz  
 IRRPW 45 usec  
 IRATN 511  
 DF1LE CHF2-Diyne (Ph, Me)-H(1H). als  
 SF TH5ATFG2  
 LKSET 61.60 KHz  
 LKFIN 79.0 Hz  
 LKLEV 180  
 LGAIN 25  
 LKPHS 250  
 LKSIG 999  
 CSPED 13 Hz  
 FILDC  
 FILDF

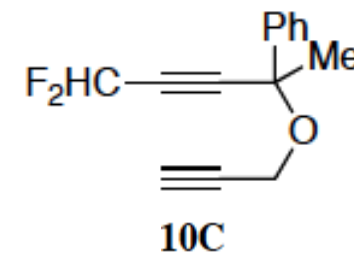

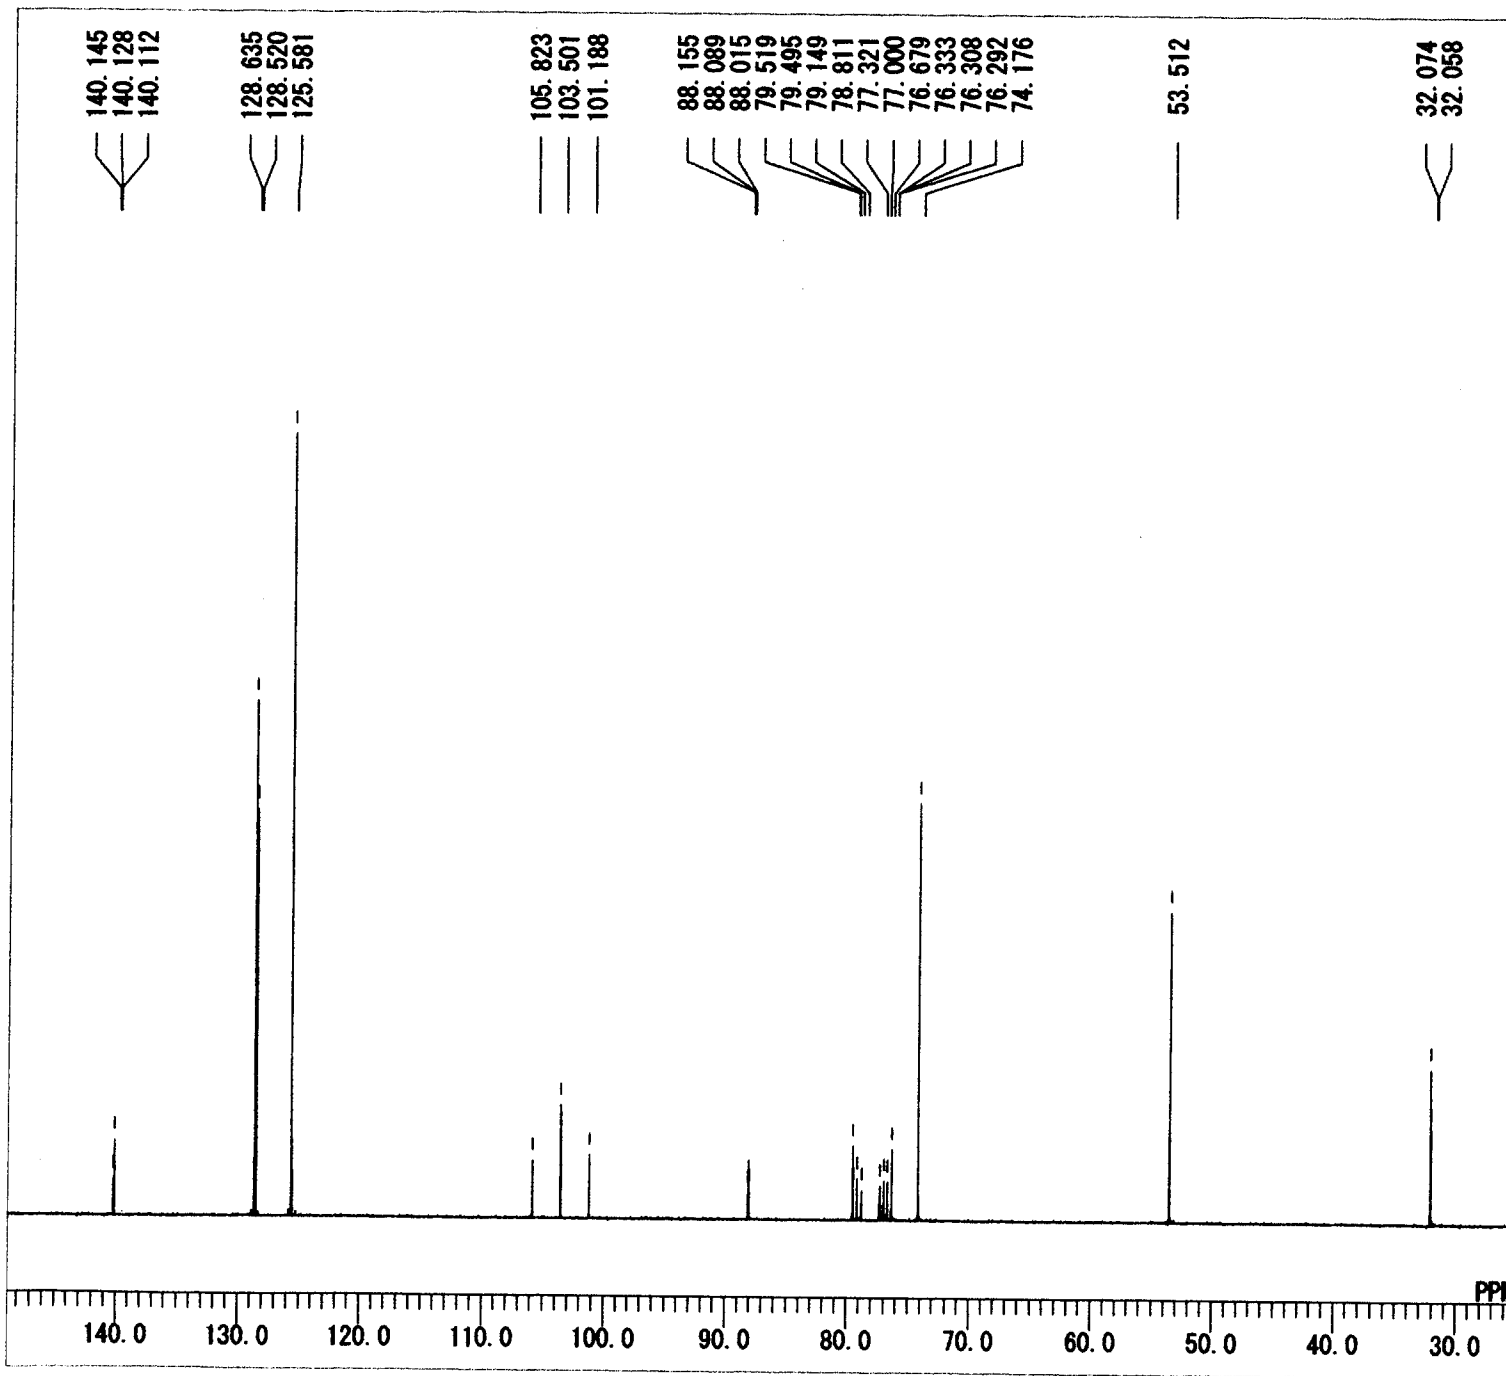

MENUF 13C  
 OBNUC 13C  
 OFR 100.40 MHz  
 OBSSET 125.00 KHz  
 OBFIN 10500.00 Hz  
 PW1 6.00 usec  
 DEADT 19.10 usec  
 PREDL 0.20000 msec  
 IWT 1.0000 msec  
 POINT 32768  
 SPO 32768  
 TIMES 512  
 DUMMY 1  
 FREQU 27118.64 Hz  
 FLT 13550 Hz  
 DELAY 14.80 usec  
 ACQTM 1.2083 sec  
 PD 1.7920 sec  
 ADBIT 16  
 RGAIN 23  
 BF 0.10 Hz  
 T1 0.00  
 T2 0.00  
 T3 90.00  
 T4 100.00  
 EXMOD BCM  
 EXPCM Bilevel. complete. decoupling: (S  
 IRNUC 1H  
 IFR 399.65 MHz  
 IRSET 124.00 KHz  
 IRFIN 10500.00 Hz  
 IRRPW 45 usec  
 IRATN 511  
 DFILE CHF2-Diyne (Ph, Me)-H(13C). als  
 SF TH5ATFG2  
 LKSET 61.60 KHz  
 LKFIN 79.0 Hz  
 LKLEV 180  
 LGAIN 25  
 LKPHS 250  
 LKSIG 1008  
 CSPED 13 Hz  
 FILDC  
 FILDF

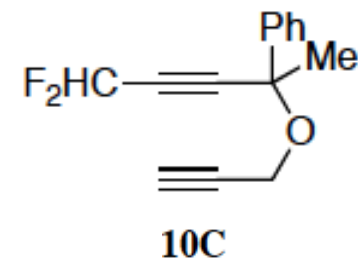



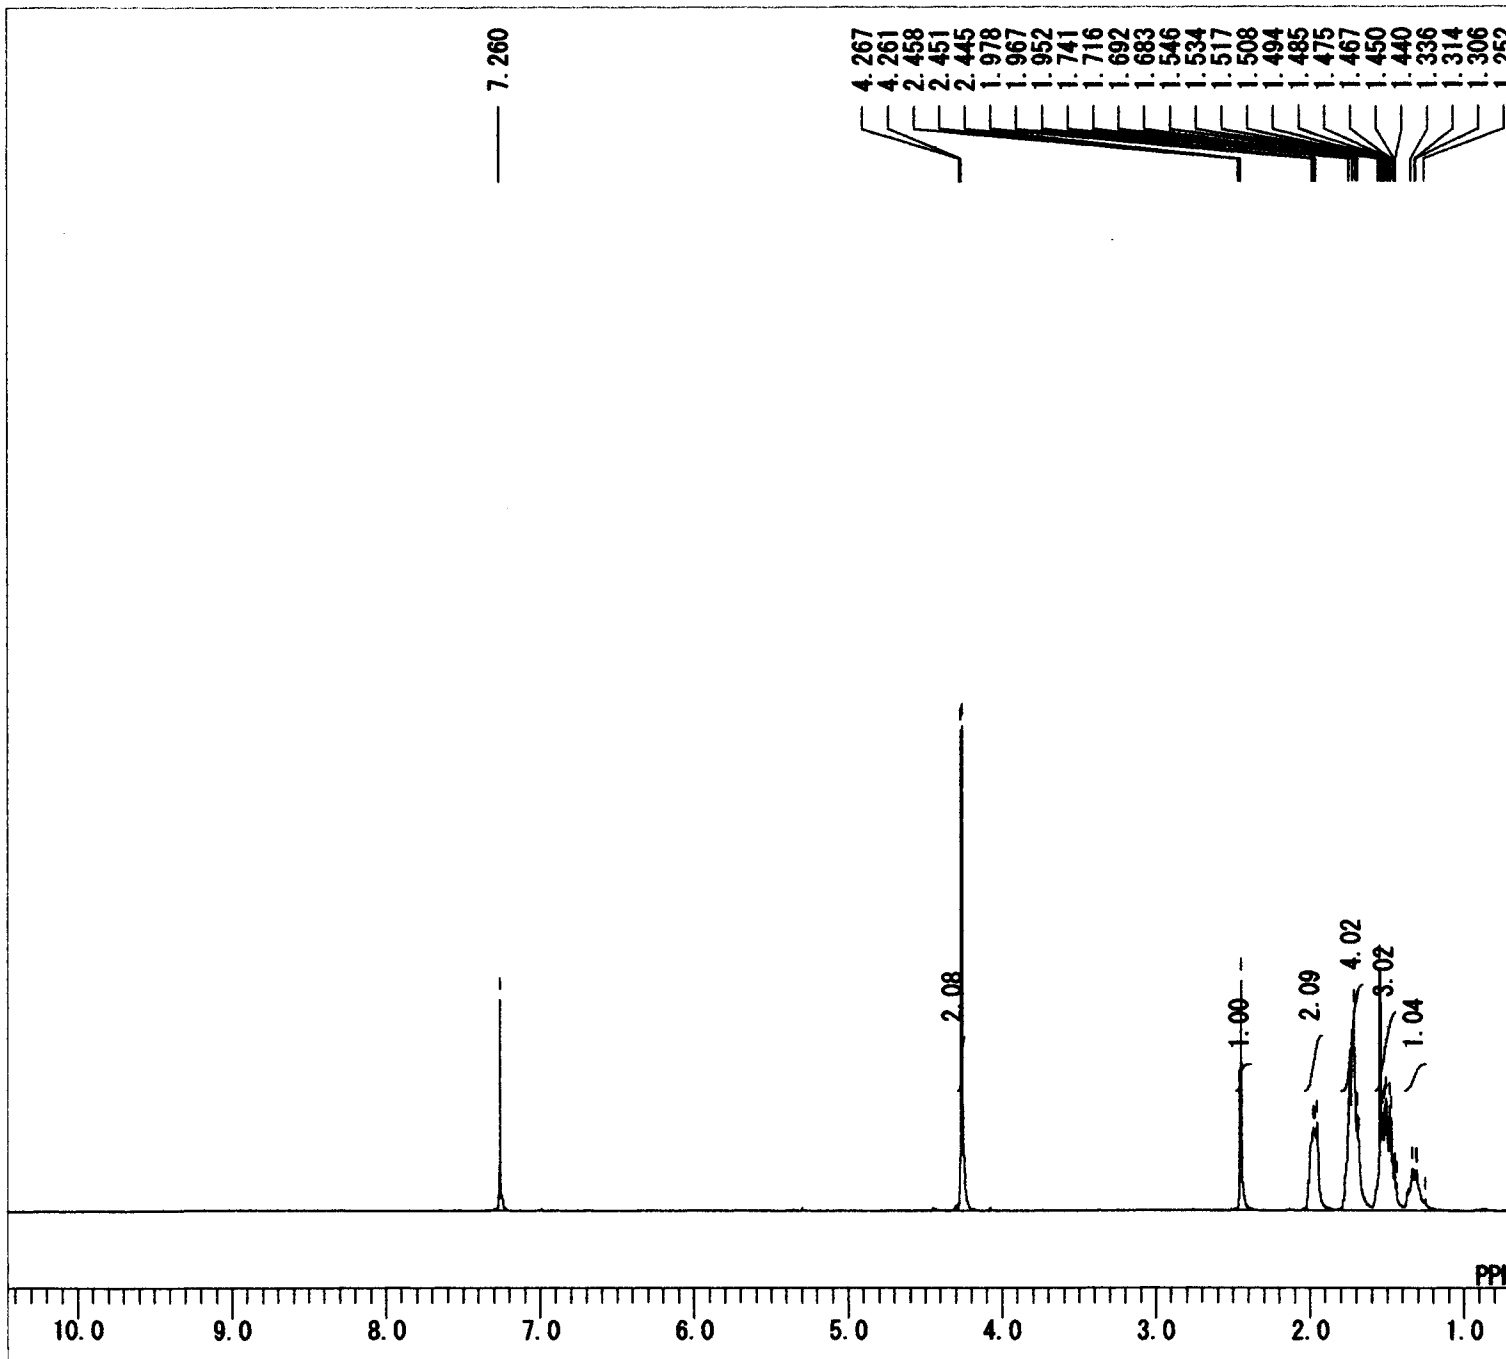

|       |                              |
|-------|------------------------------|
| MENUF | 1H                           |
| OBNUC | 1H                           |
| OFR   | 399.65 MHz                   |
| OBSET | 135.40 KHz                   |
| OBFIN | 24.90 Hz                     |
| PW1   | 5.80 usec                    |
| DEADT | 72.10 usec                   |
| PREDL | 0.20000 msec                 |
| IWT   | 1.0000 msec                  |
| POINT | 16384                        |
| SPO   | 16384                        |
| TIMES | 8                            |
| DUMMY | 1                            |
| FREQU | 7992.01 Hz                   |
| FLT   | 4000 Hz                      |
| DELAY | 50.00 usec                   |
| ACQTM | 2.0501 sec                   |
| PD    | 4.9500 sec                   |
| ADBIT | 16                           |
| RGAIN | 17                           |
| BF    | 0.10 Hz                      |
| T1    | 0.00                         |
| T2    | 0.00                         |
| T3    | 90.00                        |
| T4    | 100.00                       |
| EXMOD | NON                          |
| EXPCM | NON:Single.coupled:PW1_ACQTM |
| IRNUC | 1H                           |
| IFR   | 399.65 MHz                   |
| IRSET | 136.90 KHz                   |
| IRFIN | 97.50 Hz                     |
| IRRPW | 45 usec                      |
| IRATN | 511                          |
| DFILE | CF3-Diyne(c-Hex)-H(1H).als   |
| SF    | TH5ATFG2                     |
| LKSET | 61.60 KHz                    |
| LKFIN | 79.0 Hz                      |
| LKLEV | 180                          |
| LGAIN | 23                           |
| LKPHS | 250                          |
| LKSIG | 850                          |
| CSPED | 11 Hz                        |
| FILDC |                              |
| FILDF |                              |

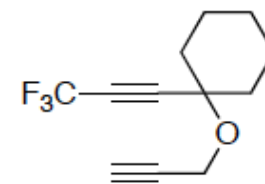

10D

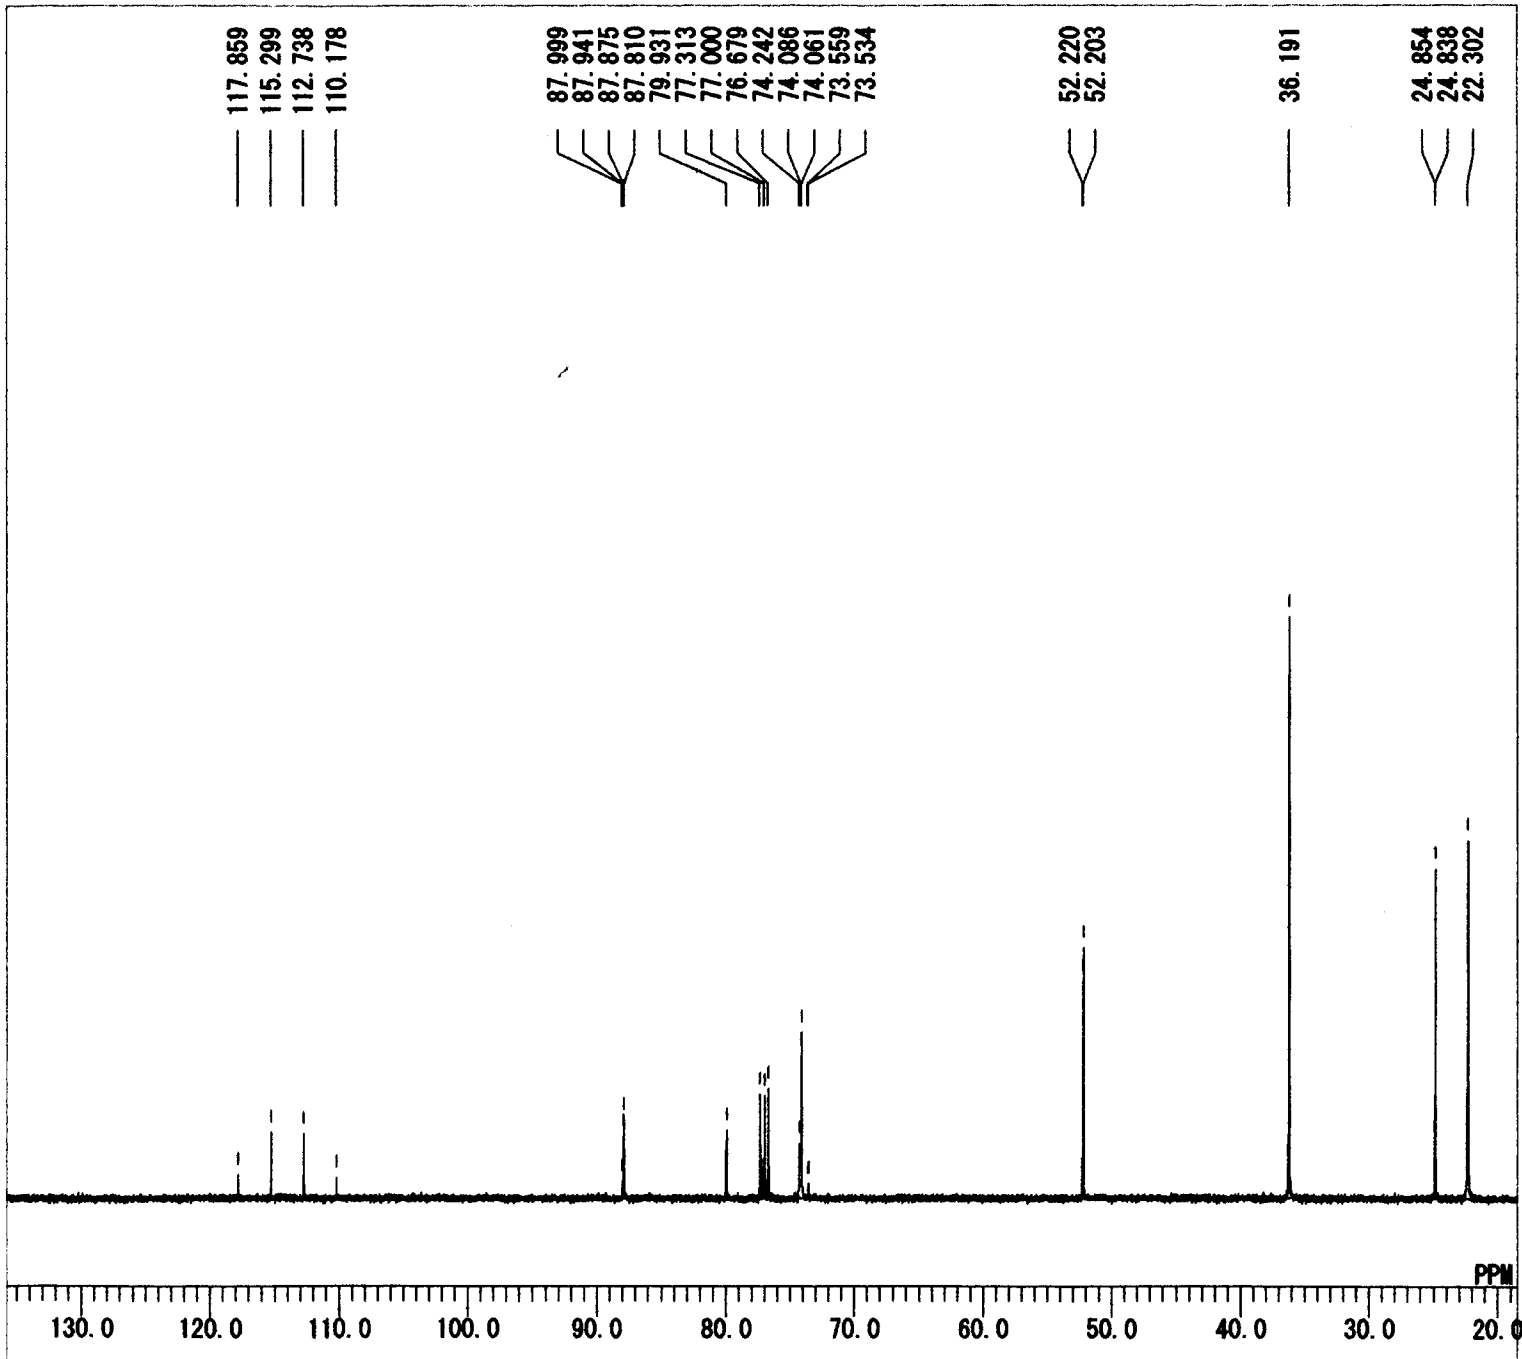

MENUF 13C  
 OBNUC 13C  
 OFR 100.40 MHz  
 OBSET 125.00 KHz  
 OBF IN 10500.00 Hz  
 PW1 6.00 usec  
 DEADT 19.10 usec  
 PREDL 0.20000 msec  
 IWT 1.0000 msec  
 POINT 32768  
 SPO 32768  
 TIMES 256  
 DUMMY 1  
 FREQU 27118.64 Hz  
 FLT 13550 Hz  
 DELAY 14.80 usec  
 ACQTM 1.2083 sec  
 PD 1.7920 sec  
 ADBIT 16  
 RGAIN 24  
 BF 0.10 Hz  
 T1 0.00  
 T2 0.00  
 T3 90.00  
 T4 100.00  
 EXMOD BCM  
 EXPCM Bilevel. complete. decoupling:  
 IRNUC 1H  
 IFR 399.65 MHz  
 IRSET 124.00 KHz  
 IRF IN 10500.00 Hz  
 IRRPW 45 usec  
 IRATN 511  
 DFILE CF3-Diyne (c-Hex)-H(13C). als  
 SF TH5ATFG2  
 LKSET 61.60 KHz  
 LKF IN 79.0 Hz  
 LKLEV 180  
 LGAIN 24  
 LKPHS 250  
 LKSIG 811  
 CSPED 7 Hz  
 FILDC  
 FILDF

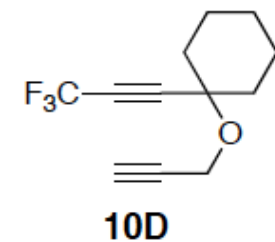

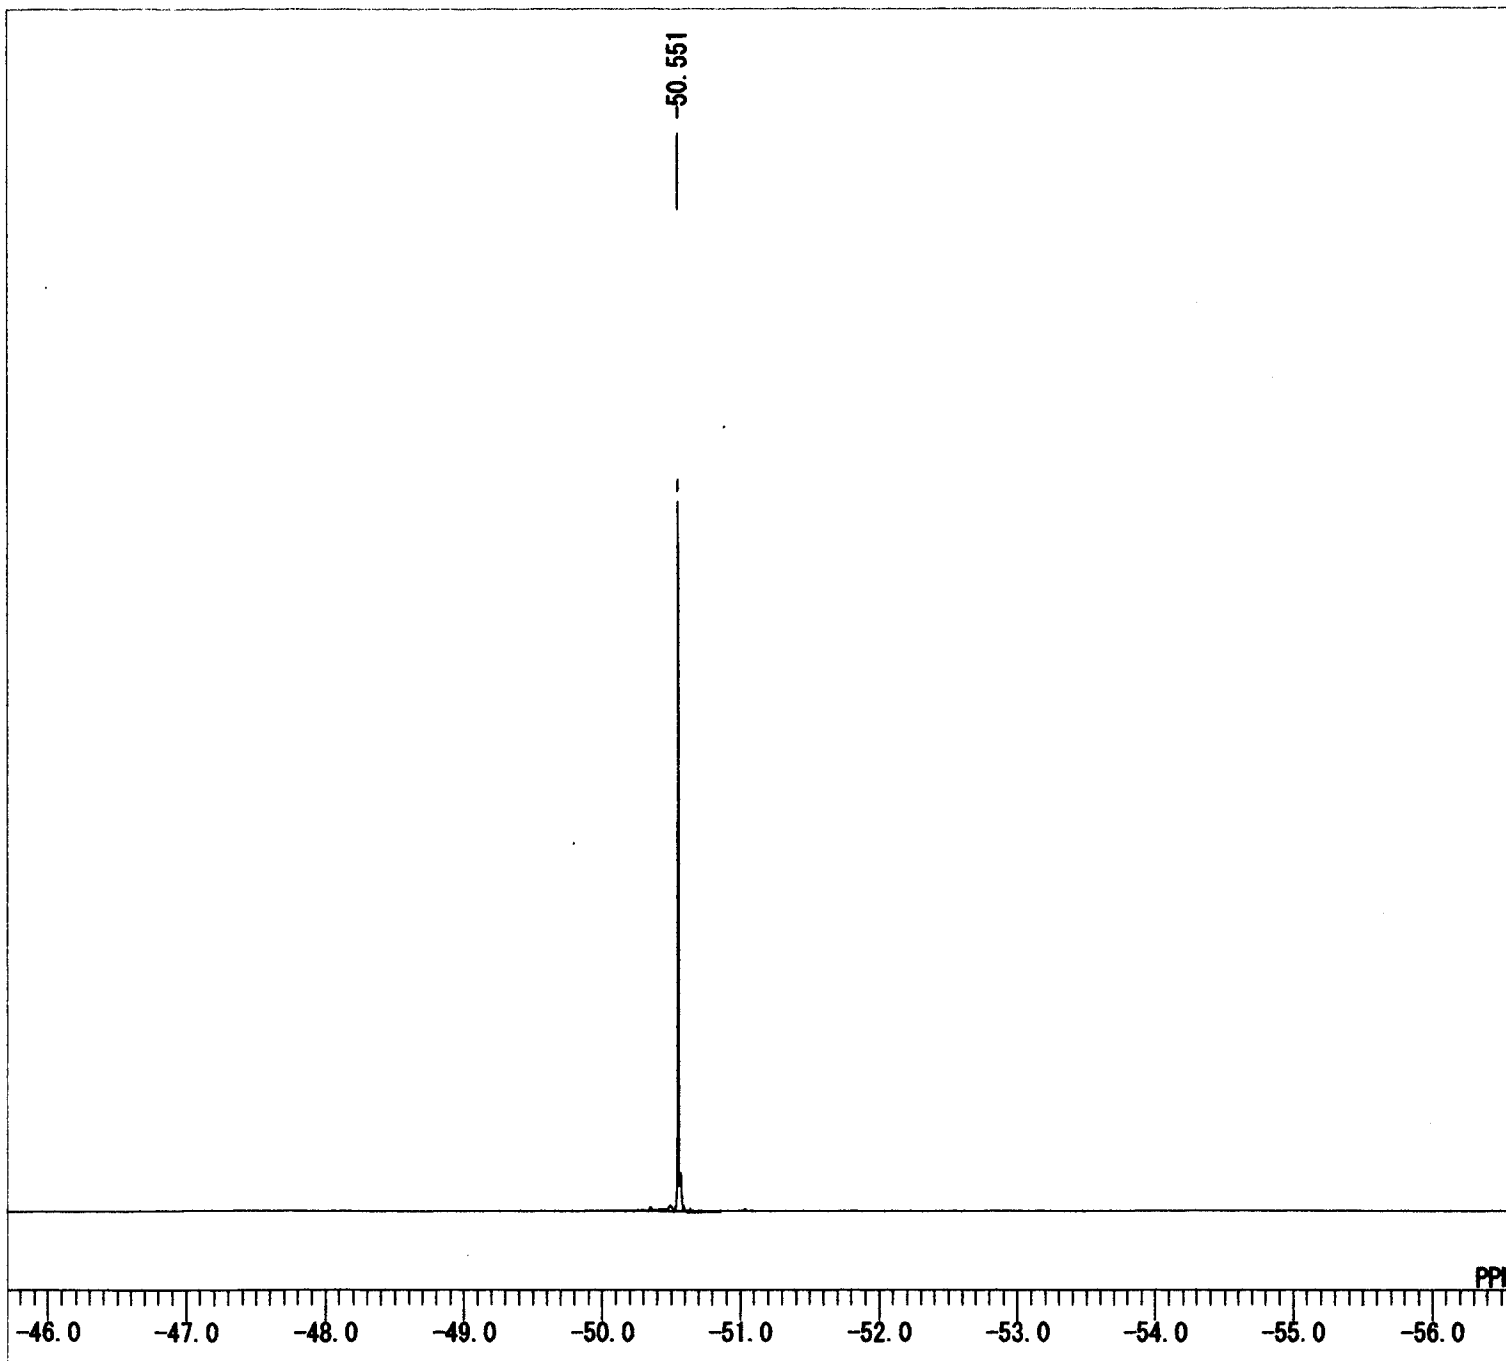

```

MENUF 19F
OBNUC 19F
OFR      376.05 MHz
OBSET    139.60 KHz
OBFIN    36.10 Hz
PW1      6.00 usec
DEADT    10.00 usec
PREDL    0.20000 msec
IWT      1.0000 msec
POINT    32768
SPO      32768
TIMES    16
DUMMY    1
FREGU    80000.00 Hz
FLT      40000 Hz
DELAY    5.00 usec
ACQTM    0.4096 sec
PD       4.9500 sec
ADBIT    16
RGAIN    14
BF       0.10 Hz
T1       0.00
T2       0.00
T3       90.00
T4       100.00
EXMOD    NON
EXPCM    NON:Single.coupled:PW1_ACQTM
IRNUC    1H
IFR      399.65 MHz
IRSET    124.00 KHz
IRFIN    10500.00 Hz
IRRPW    45 usec
IRATN    511
DFILE    CF3-Diyne(c-Hex)-H(19F).als
SF       TH5ATFG2
LKSET    61.60 KHz
LKFIN    79.0 Hz
LKLEV    180
LGAIN    23
LKPHS    250
LKSIG    838
CSPED    11 Hz
FILDC
FILDF

```

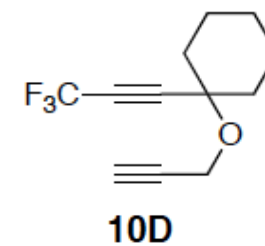



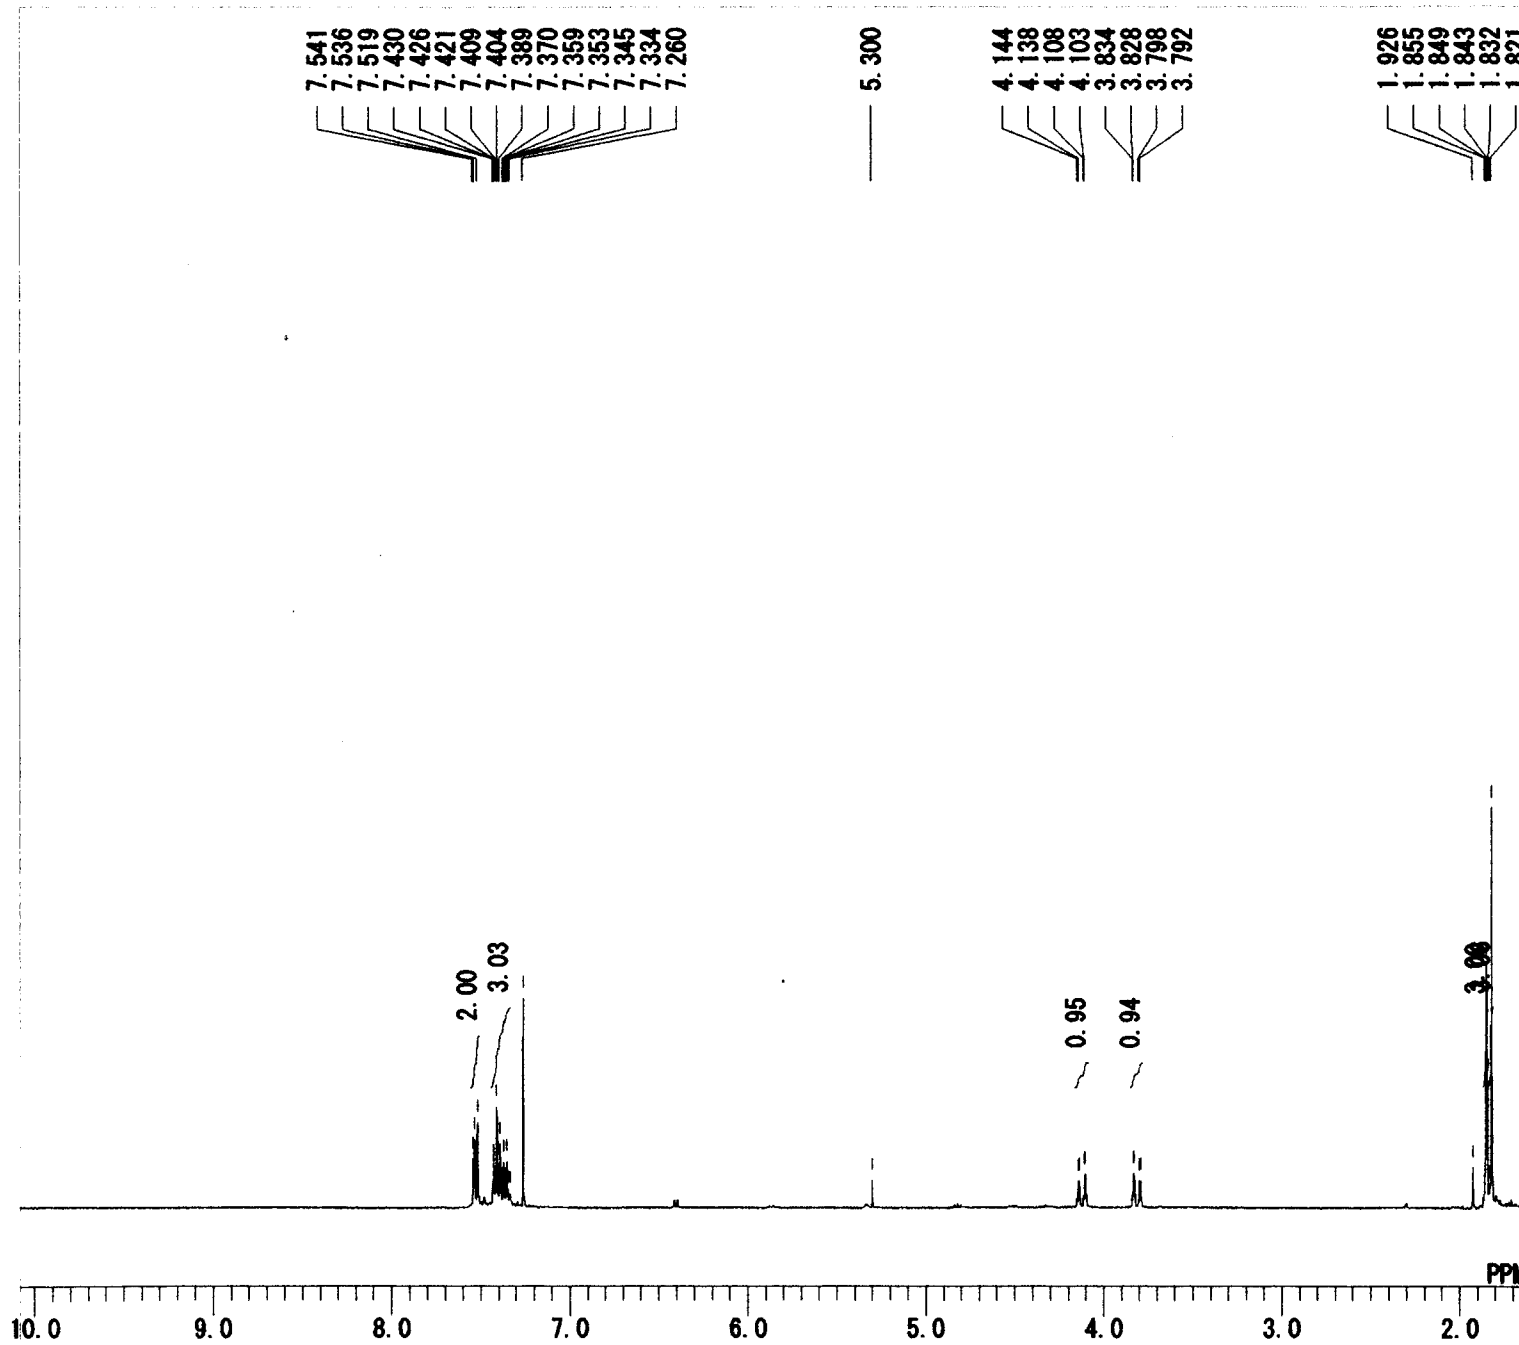

|       |                               |
|-------|-------------------------------|
| MENUF | 1H                            |
| OBNUC | 1H                            |
| OFR   | 399.65 MHz                    |
| OBSET | 135.40 KHz                    |
| OBFIN | 24.90 Hz                      |
| PW1   | 5.80 usec                     |
| DEADT | 72.10 usec                    |
| PREDL | 0.20000 msec                  |
| IWT   | 1.0000 msec                   |
| POINT | 16384                         |
| SPO   | 16384                         |
| TIMES | 8                             |
| DUMMY | 1                             |
| FREQU | 7992.01 Hz                    |
| FLT   | 4000 Hz                       |
| DELAY | 50.00 usec                    |
| ACQTM | 2.0501 sec                    |
| PD    | 4.9500 sec                    |
| ADBIT | 16                            |
| RGAIN | 19                            |
| BF    | 0.10 Hz                       |
| T1    | 0.00                          |
| T2    | 0.00                          |
| T3    | 90.00                         |
| T4    | 100.00                        |
| EXMOD | NON                           |
| EXPCM | NON:Single. coupled:PW1_ACQTM |
| IRNUC | 1H                            |
| IFR   | 399.65 MHz                    |
| IRSET | 136.90 KHz                    |
| IRFIN | 97.50 Hz                      |
| IRRPW | 45 usec                       |
| IRATN | 511                           |
| DFILE | diyne-PhMe-Me(1H)混.als        |
| SF    | TH5ATFG2                      |
| LKSET | 61.60 KHz                     |
| LKFIN | 79.0 Hz                       |
| LKLEV | 180                           |
| LGAIN | 26                            |
| LKPHS | 250                           |
| LKSIG | 2681                          |
| CSPED | 12 Hz                         |
| FILDC |                               |
| FILDF |                               |

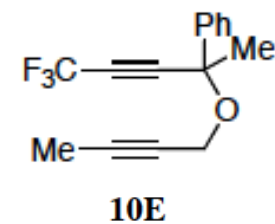





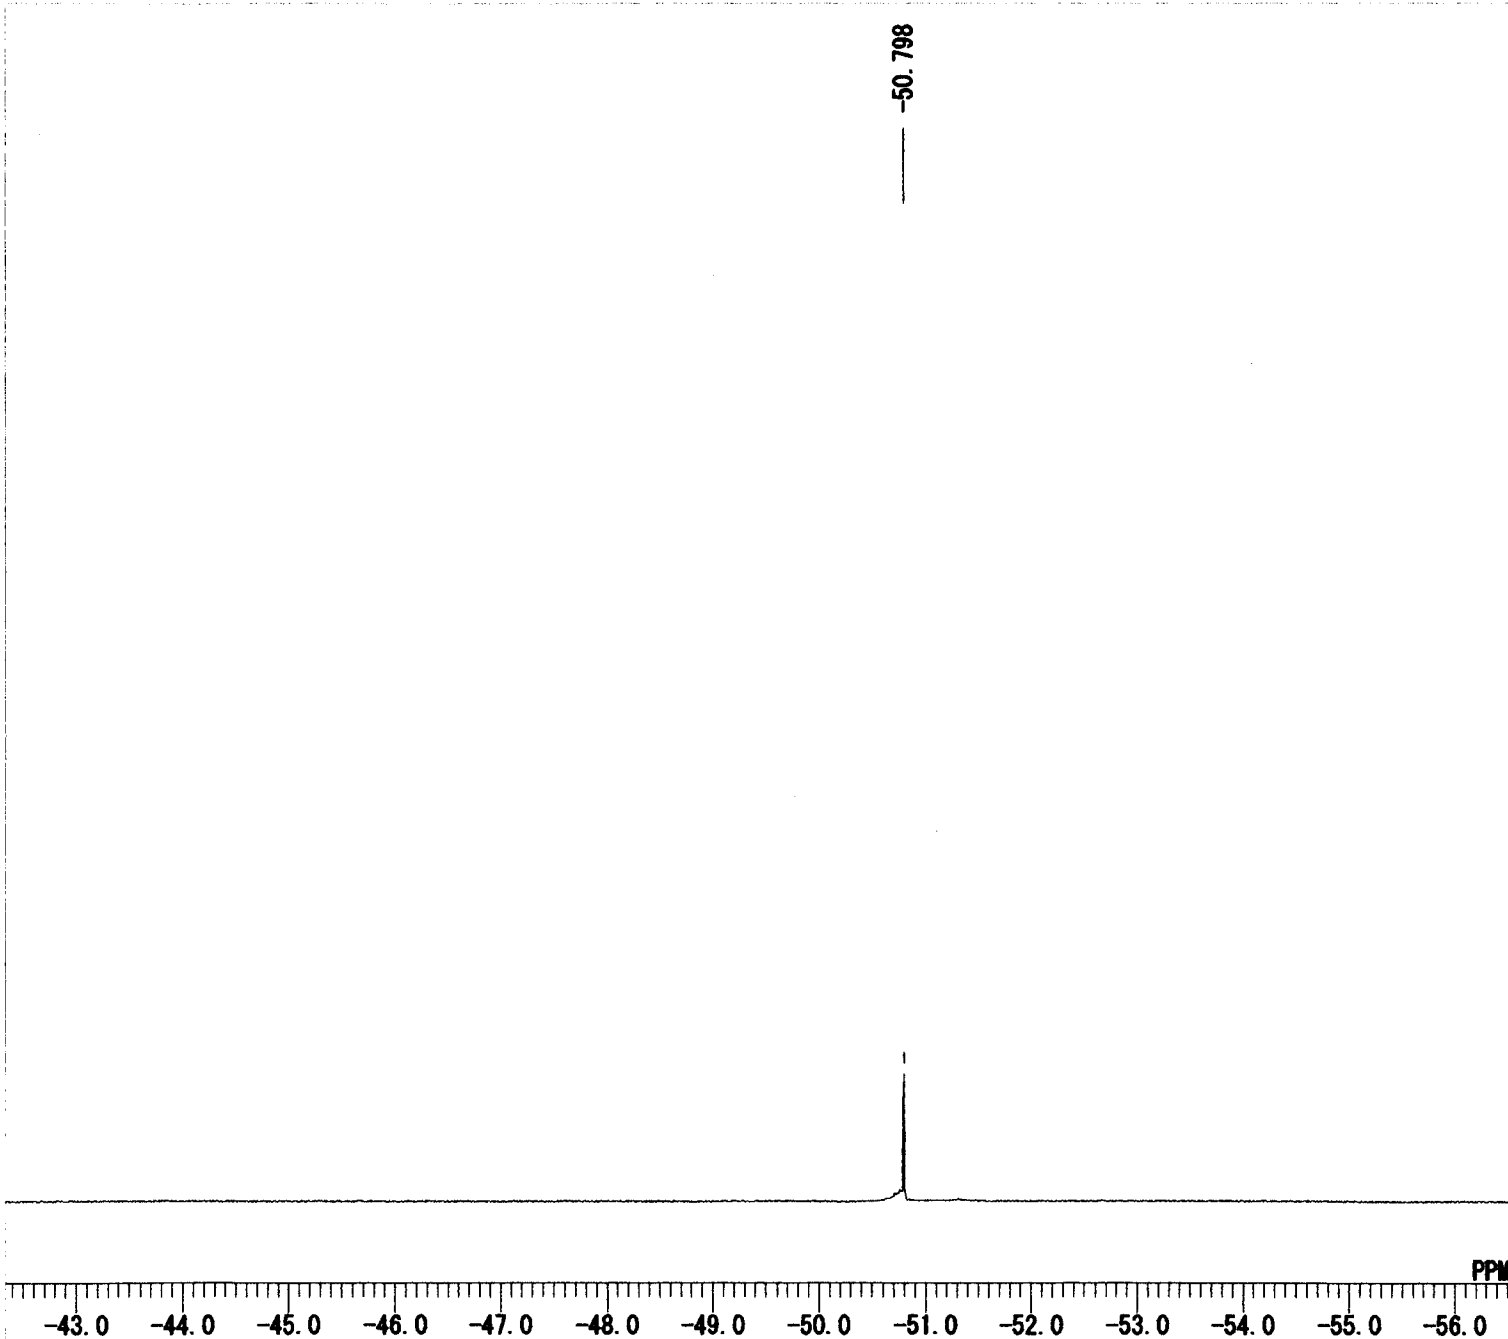

```

MENUF 19F
OENUC 19F
OFR      376.05 MHz
OBSET    139.60 KHz
OBFIN    36.10 Hz
PW1       6.00 usec
DEADT    10.00 usec
PREDL    0.20000 msec
IWT      1.0000 msec
POINT    32768
SPO      32768
TIMES    16
DUMMY    1
FREQU    80000.00 Hz
FLT      40000 Hz
DELAY    5.00 usec
ACQTM    0.4096 sec
PD       4.9500 sec
ADBIT    16
RGAIN    14
BF        0.10 Hz
T1        0.00
T2        0.00
T3        90.00
T4       100.00
EXMOD    NON
EXPCM    NON:Single.coupled:PW1_ACQTM
IRNUC    1H
IFR      399.65 MHz
IRSET    124.00 KHz
IRFIN    10500.00 Hz
IRRPW    45 usec
IRATN    511
DFILE    CF3-diyne-n-C6H13(19F).als
SF       TH5ATFG20
LKSET    61.60 KHz
LKFIN    79.0 Hz
LKLEV    180
LGAIN    23
LKPHS    250
LKSIG    626
CSPED    11 Hz
FILDC
FILDF

```

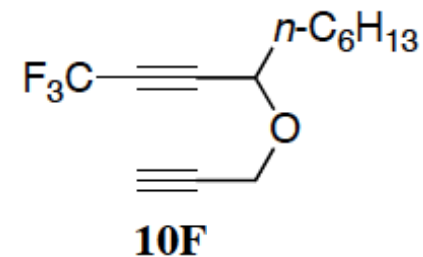

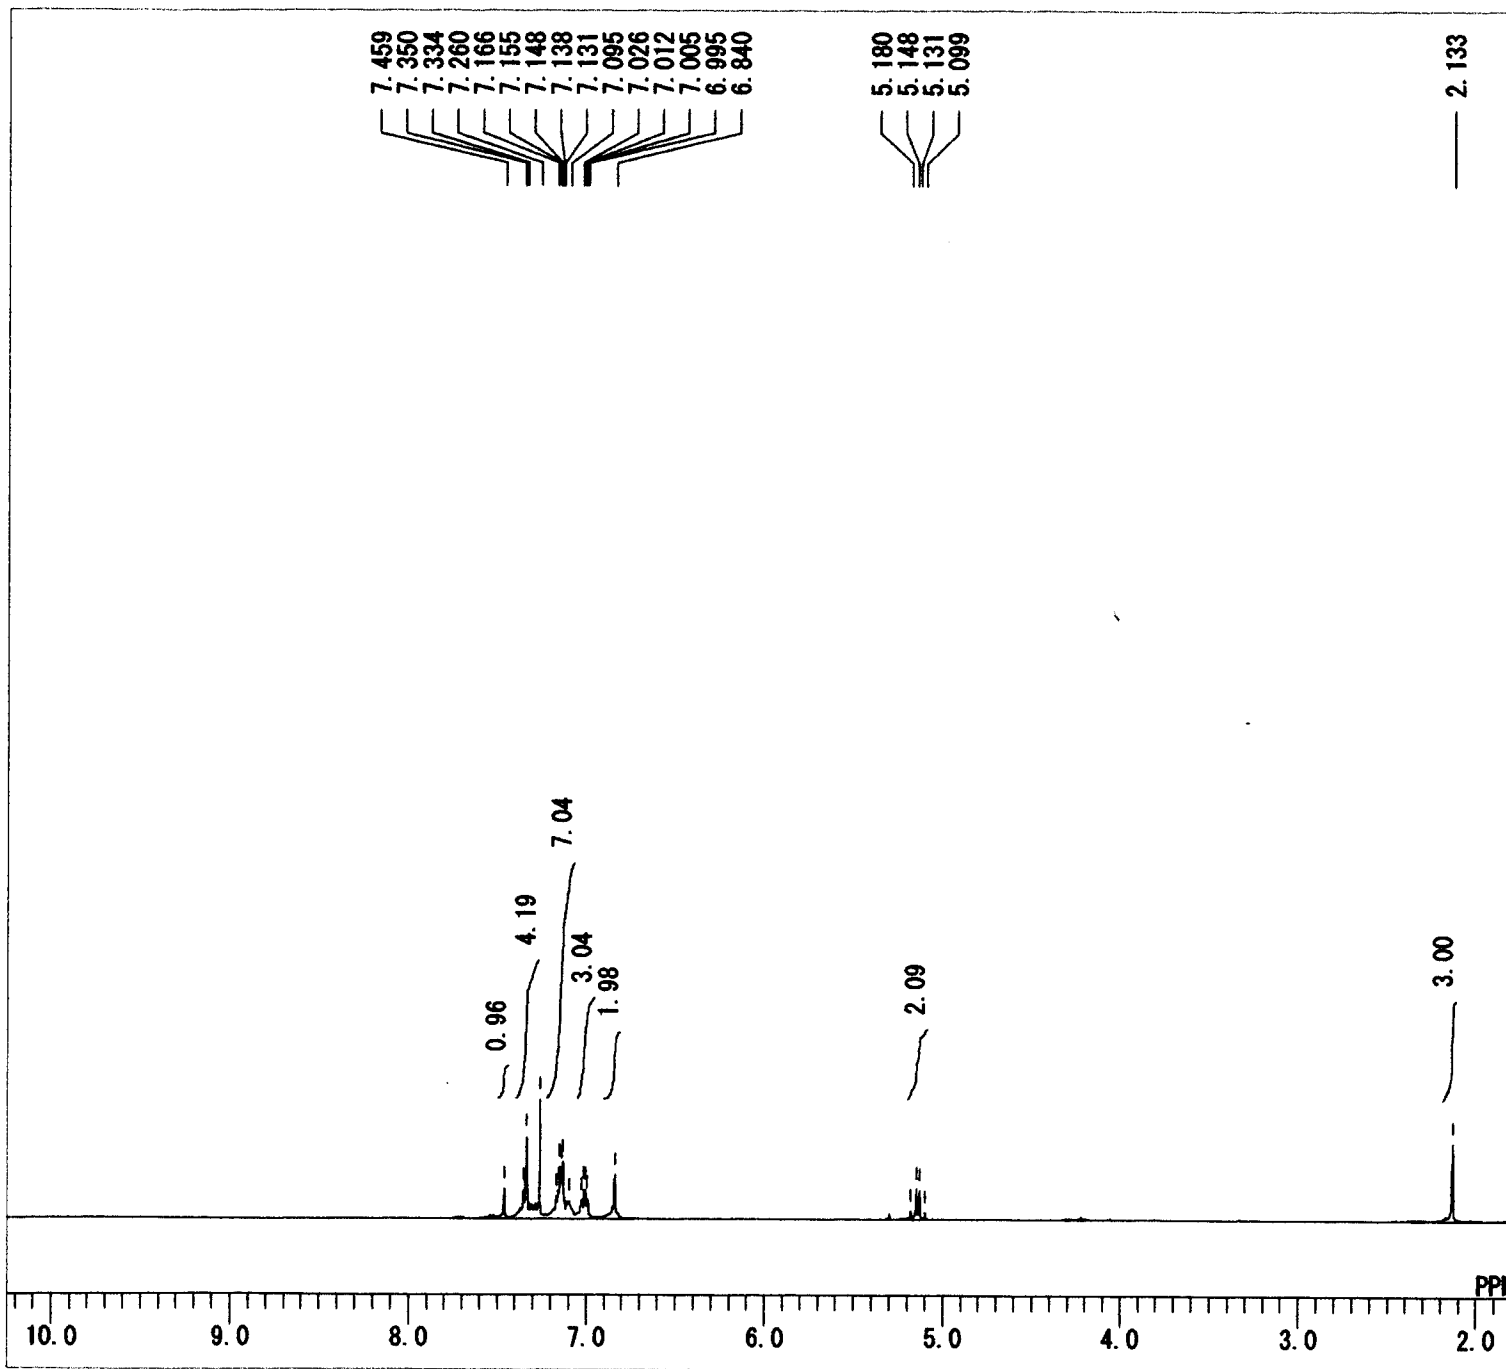

```

MNUF 1H
OBNUC 1H
OFR 399.65 MHz
OBSET 135.40 KHz
OBF1N 24.90 Hz
PW1 5.80 usec
DEADT 72.10 usec
PREDL 0.20000 msec
IWT 1.0000 msec
POINT 16384
SPO 16384
TIMES 8
DUMMY 1
FREQU 7992.01 Hz
FLT 4000 Hz
DELAY 50.00 usec
ACQTM 2.0501 sec
PD 4.9500 sec
ADBIT 16
RGAIN 18
BF 0.10 Hz
T1 0.00
T2 0.00
T3 90.00
T4 100.00
EXMOD NON
EXPCM NON:Single.coupled:PW1_ACQTM
IRNUC 1H
IFR 399.65 MHz
IRSET 136.90 KHz
IRFIN 97.50 Hz
IRRPW 45 usec
IRATN 511
DFILE CF3-Diyne(PhMe)-H+diphenylac
SF TH5ATFG2
LKSET 61.60 KHz
LKFIN 79.0 Hz
LKLEV 180
LGAIN 24
LKPHS 249
LKSIG 1157
CSPED 13 Hz
FILDC
FILDF
  
```

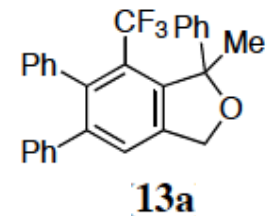

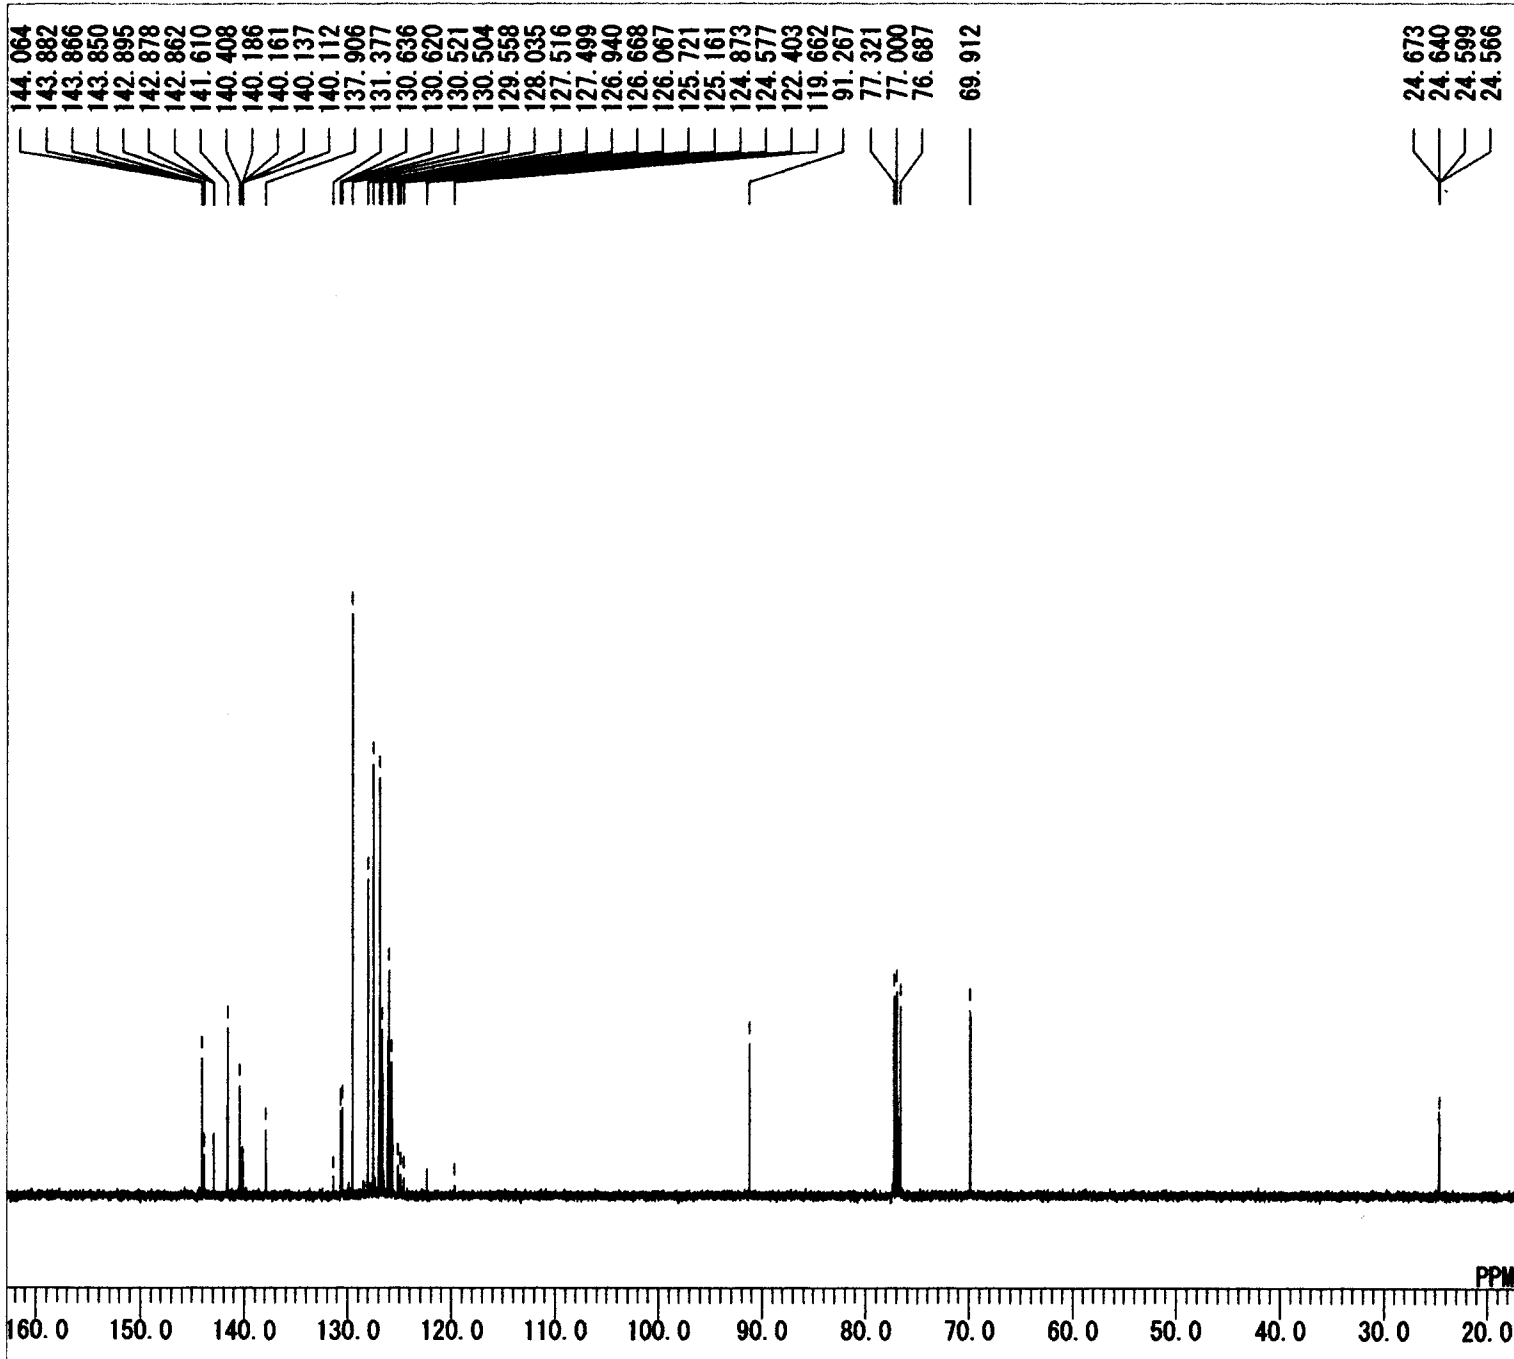

MENUF 13C  
 OBNUC 13C  
 OFR 100.40 MHz  
 OBSET 125.00 KHz  
 OBFIN 10500.00 Hz  
 PW1 6.00 usec  
 DEADT 19.10 usec  
 PREDL 0.20000 msec  
 IWT 1.0000 msec  
 POINT 32768  
 SPO 32768  
 TIMES 256  
 DUMMY 1  
 FREQU 27118.64 Hz  
 FLT 13550 Hz  
 DELAY 14.80 usec  
 ACQTM 1.2083 sec  
 PD 1.7920 sec  
 ADBIT 16  
 RGAIN 25  
 BF 0.10 Hz  
 T1 0.00  
 T2 0.00  
 T3 90.00  
 T4 100.00  
 EXMOD BCM  
 EXPCM Bi level. complete. decoupling:  
 IRNUC 1H  
 IFR 399.65 MHz  
 IRSET 124.00 KHz  
 IRFIN 10500.00 Hz  
 IRRPW 45 usec  
 IRATN 511  
 DFILE CF3-Diyne (PhMe)-H+diphenylac  
 SF TH5ATFG2  
 LKSET 61.60 KHz  
 LKFIN 79.0 Hz  
 LKLEV 180  
 LGAIN 25  
 LKPHS 250  
 LKSIG 1541  
 CSPED 10 Hz  
 FILDC  
 FILDF

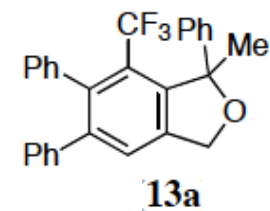

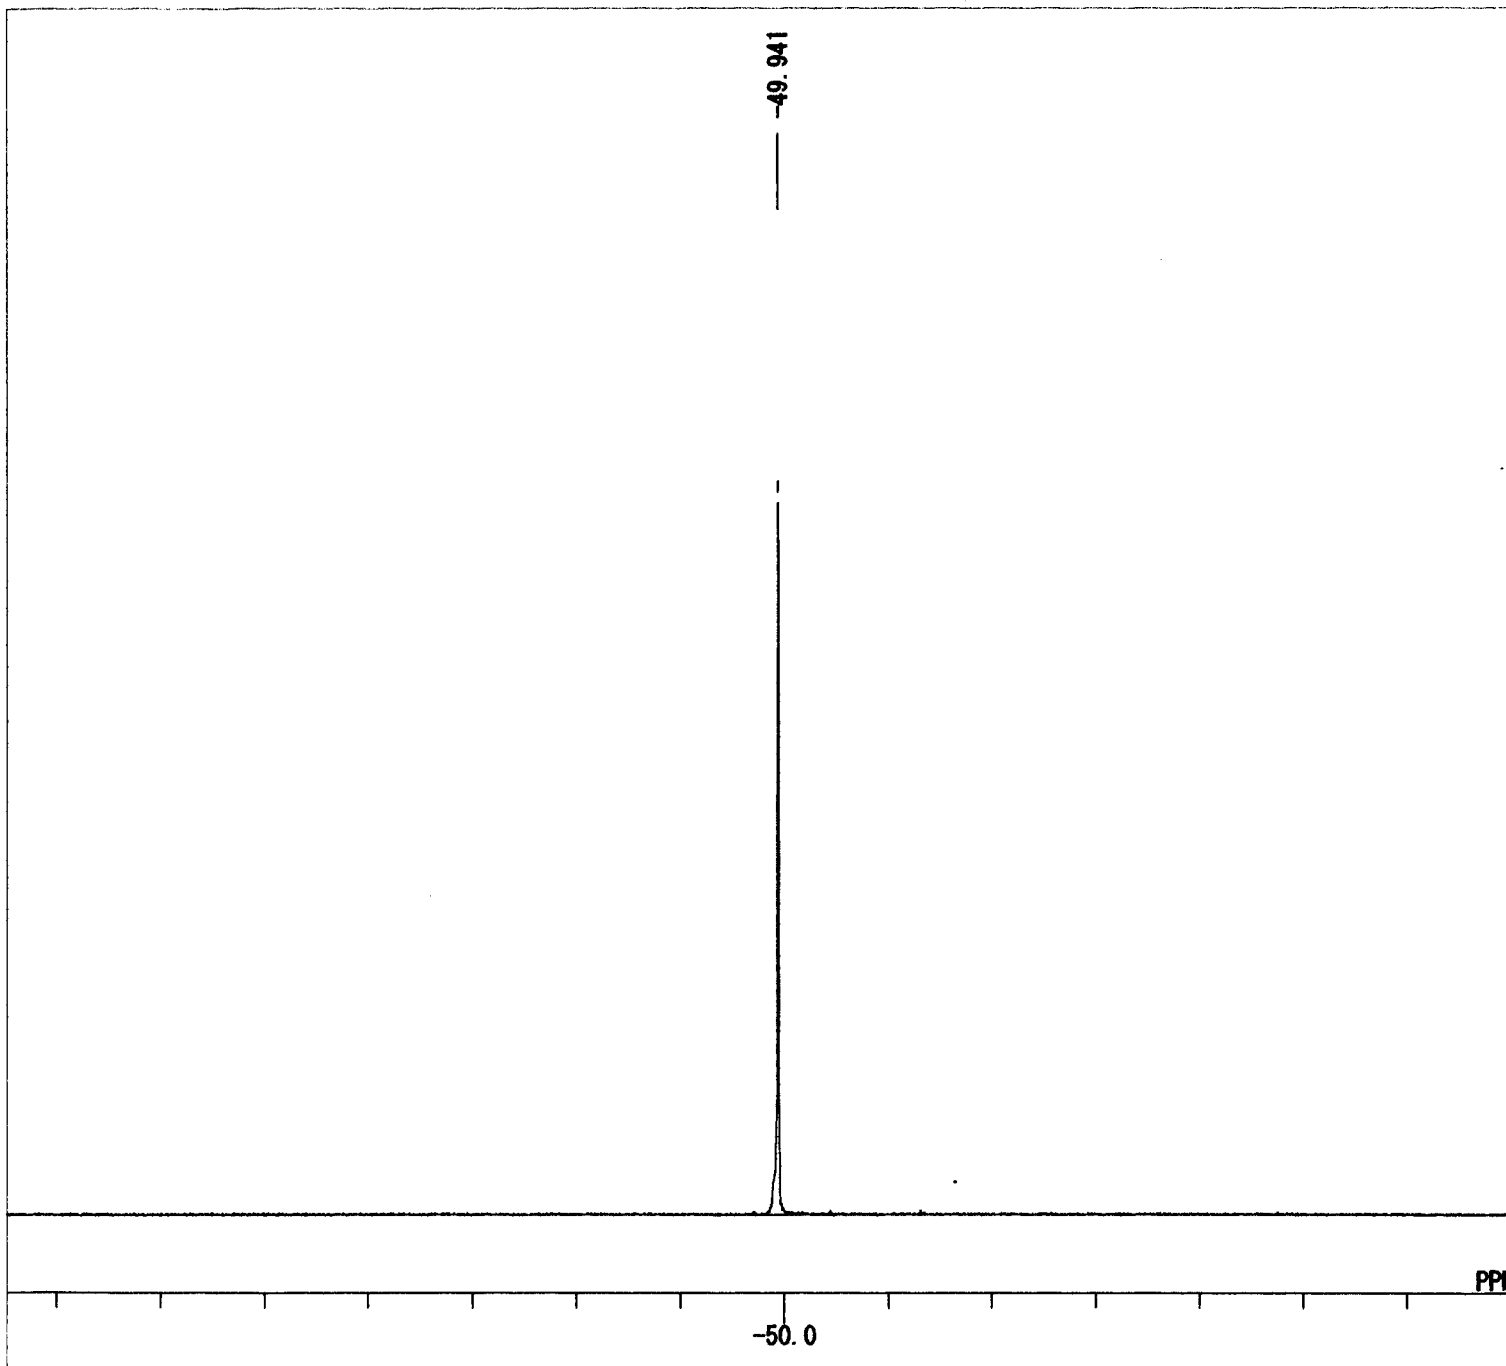

```

MENUF 19F
OBNUC 19F
OFR 376.05 MHz
OBSET 139.60 KHz
OBFIN 36.10 Hz
PW1 6.00 usec
DEADT 10.00 usec
PREDL 0.20000 msec
IWT 1.0000 msec
POINT 32768
SPO 32768
TIMES 16
DUMMY 1
FREQU 80000.00 Hz
FLT 40000 Hz
DELAY 5.00 usec
ACQTM 0.4096 sec
PD 4.9500 sec
ADBIT 16
RGAIN 14
BF 0.10 Hz
T1 0.00
T2 0.00
T3 90.00
T4 100.00
EXMOD NON
EXPCM NON:Single.coupled:PW1_ACQTM
IRNUC 1H
IFR 399.65 MHz
IRSET 124.00 KHz
IRFIN 10500.00 Hz
IRRPW 45 usec
IRATN 511
DFILE CF3-Diyne(PhMe)-H+diphenylac
SF TH5ATFG2
LKSET 61.60 KHz
LKFIN 79.0 Hz
LKLEV 180
LGAIN 24
LKPHS 249
LKSIG 1161
GSPED 13 Hz
FILDC
FILDF

```

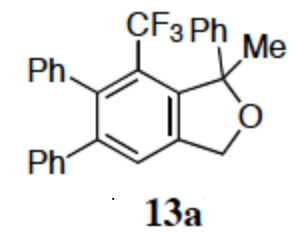

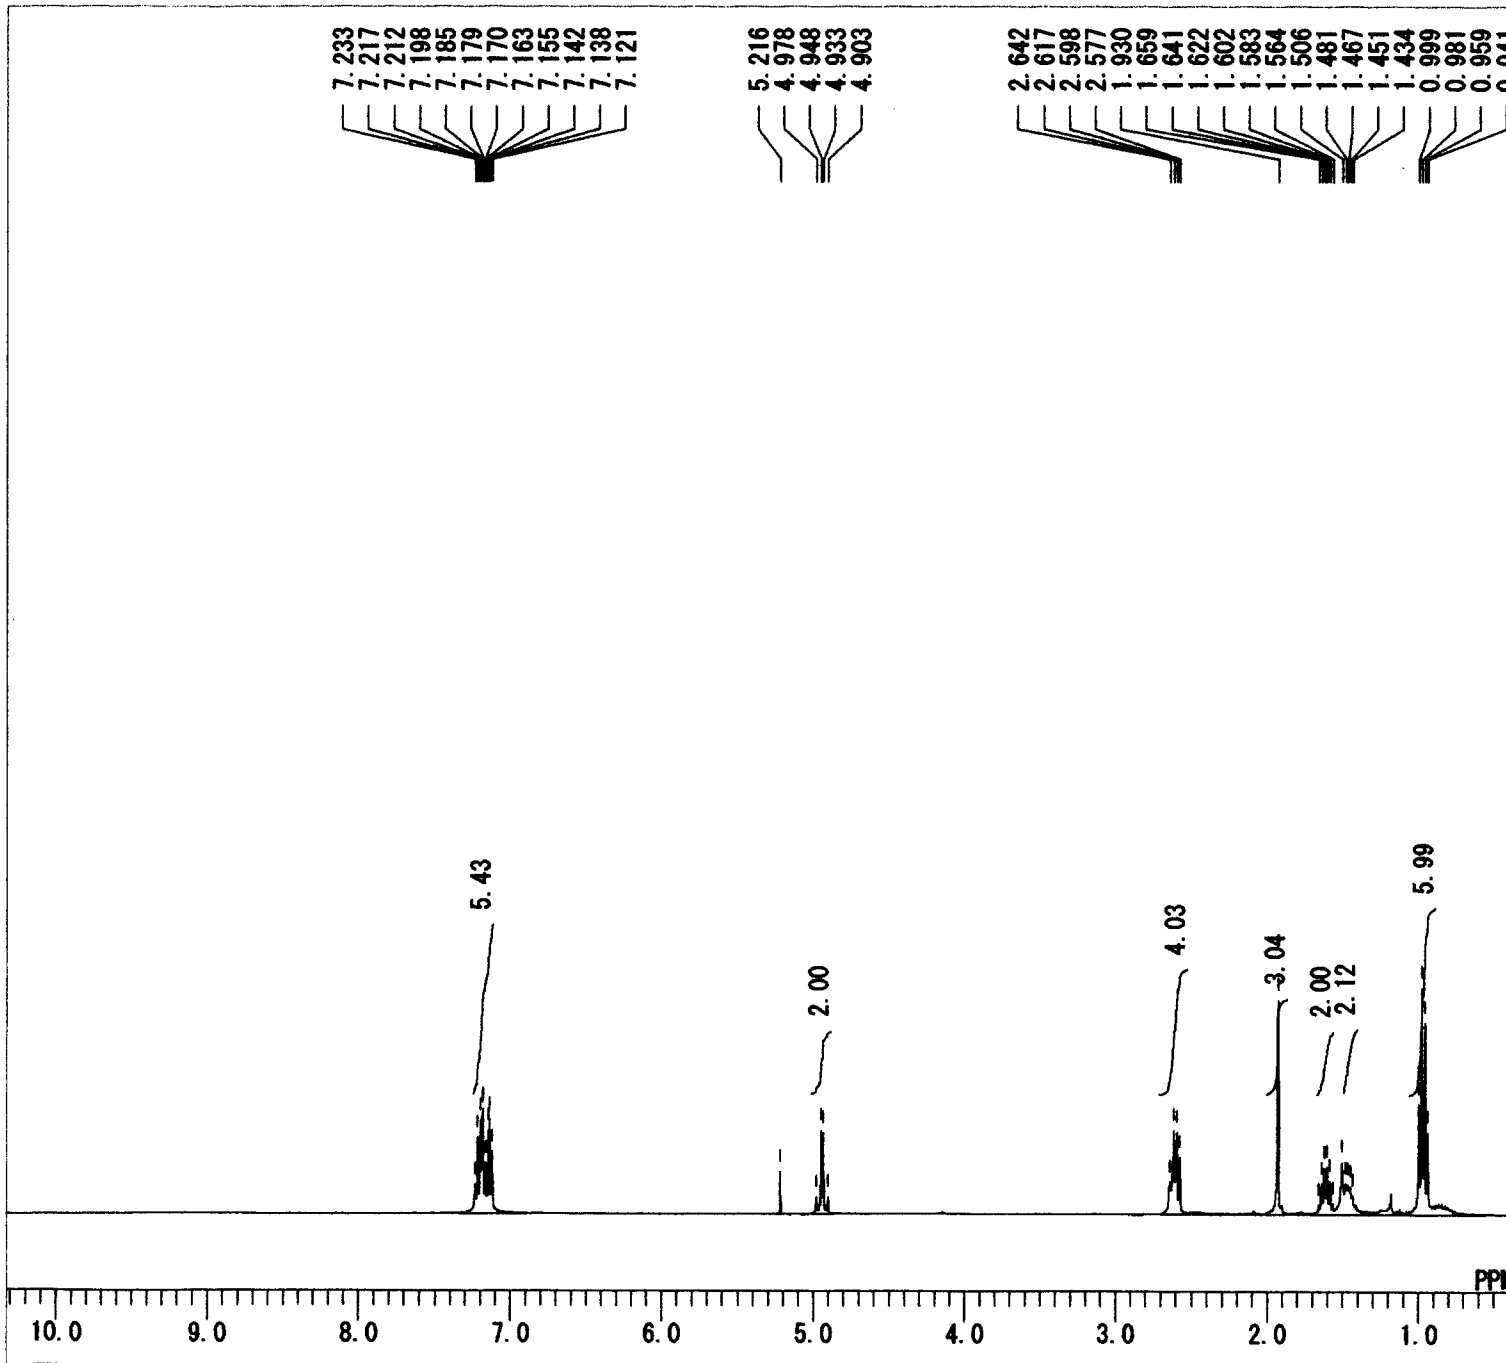

MENUF 1H  
 OBNUC 1H  
 OFR 399.65 MHz  
 OBSET 135.40 KHz  
 OBFIN 24.90 Hz  
 PW1 5.80 usec  
 DEADT 72.10 usec  
 PREDL 0.20000 msec  
 IWT 1.0000 msec  
 POINT 16384  
 SPO 16384  
 TIMES 8  
 DUMMY 1  
 FREQU 7992.01 Hz  
 FLT 4000 Hz  
 DELAY 50.00 usec  
 ACQTM 2.0501 sec  
 PD 4.9500 sec  
 ADBIT 16  
 RGAIN 13  
 BF 0.10 Hz  
 T1 0.00  
 T2 0.00  
 T3 90.00  
 T4 100.00  
 EXMOD NON  
 EXPCM NON:Single.coupled:PW1\_ACQTM  
 IRNUC 1H  
 IFR 399.65 MHz  
 IRSET 136.90 KHz  
 IRFIN 97.50 Hz  
 IRRPW 45 usec  
 IRATN 511  
 DFILE CF3-Diyne(PhMe)-H+4-Octyne-(  
 SF TH5ATFG2  
 LKSET 61.60 KHz  
 LKFIN 79.0 Hz  
 LKLEV 180  
 LGAIN 25  
 LKPHS 250  
 LKSIG 1596  
 CSPED 10 Hz  
 FILDC  
 FILDF

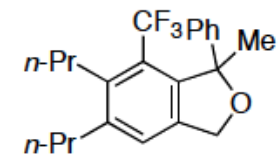

13b



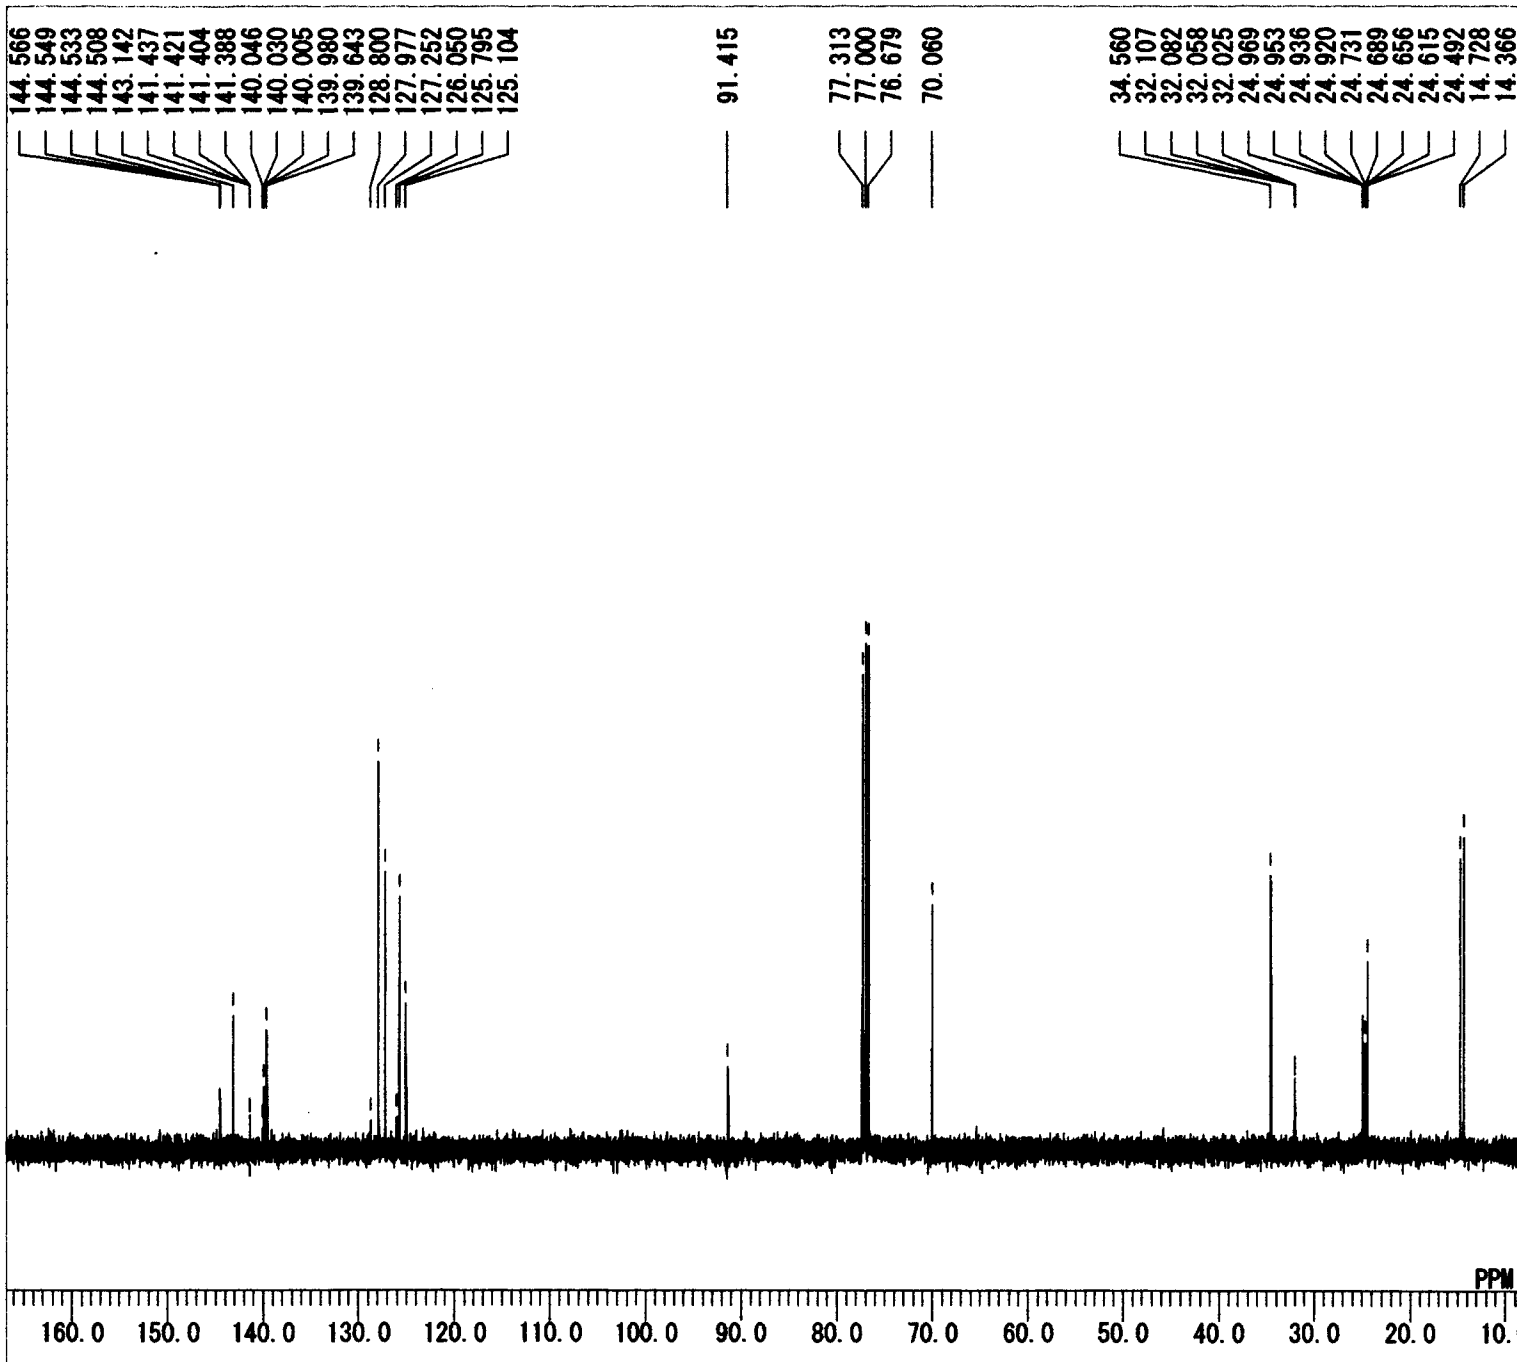

MENUF 13C  
OBRUC 13C  
OFR 100.40 MHz  
OBSET 125.00 KHz  
OBF IN 10500.00 Hz  
PW1 6.00 usec  
DEADT 19.10 usec  
PREDL 0.20000 msec  
IWT 1.0000 msec  
POINT 32768  
SPO 32768  
TIMES 512  
DUMMY 1  
FREQU 27118.64 Hz  
FLT 13550 Hz  
DELAY 14.80 usec  
ACQTM 1.2083 sec  
PD 1.7920 sec  
ADBIT 16  
RGAIN 25  
BF 0.10 Hz  
T1 0.00  
T2 0.00  
T3 90.00  
T4 100.00  
EXMOD BCM  
EXPCM Bilevel. complete. decoupling:  
IRNUC 1H  
IFR 399.65 MHz  
IRSET 124.00 KHz  
IRFIN 10500.00 Hz  
IRRPW 45 usec  
IRATN 511  
DFILE CF3-Diyne(PhMe)-H+4-Octyne-(  
SF TH5ATFG2  
LKSET 61.60 KHz  
LKFIN 79.0 Hz  
LKLEV 180  
LGAIN 25  
LKPHS 250  
LKSIG 1580  
CSPED 13 Hz  
FILDC  
FILDF

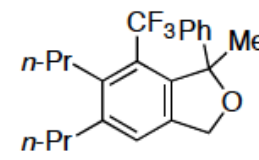

13b



C:\WINNMR\DATA\Fluorine\Moriyasu\product-diyne-PhMe-diTMS(1H)-混.als

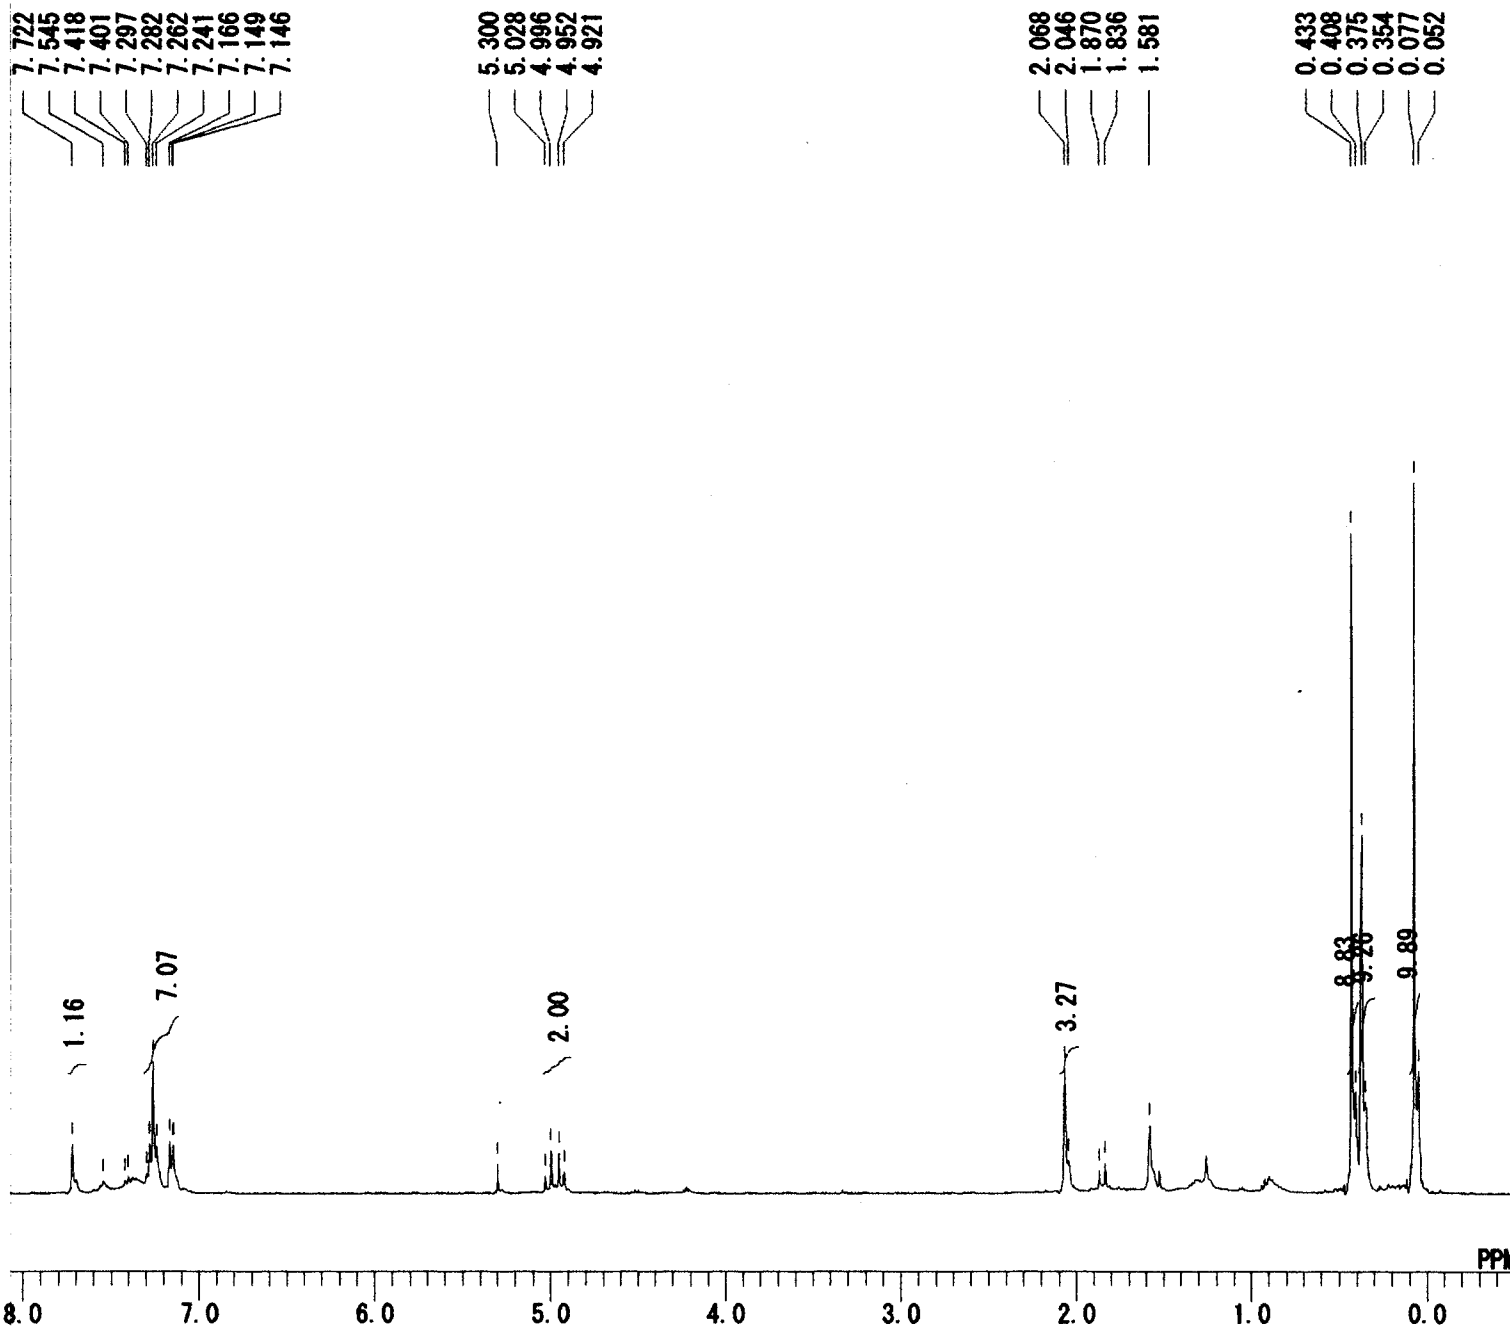

MENUF 1H  
 OBNUC 1H  
 OFR 399.65 MHz  
 OBSET 135.40 KHz  
 OBF IN 24.90 Hz  
 PW1 5.80 usec  
 DEADT 72.10 usec  
 PREDL 0.20000 msec  
 IWT 1.0000 msec  
 POINT 16384  
 SPO 16384  
 TIMES 8  
 DUMMY 1  
 FREQU 7992.01 Hz  
 FLT 4000 Hz  
 DELAY 50.00 usec  
 ACQTM 2.0501 sec  
 PD 4.9500 sec  
 ADBIT 16  
 RGAIN 15  
 BF 0.10 Hz  
 T1 0.00  
 T2 0.00  
 T3 90.00  
 T4 100.00  
 EXMOD NON  
 EXPCM NON:Single.coupled:PW1\_ACQTM  
 IRNUC 1H  
 IFR 399.65 MHz  
 IRSET 136.90 KHz  
 IRF IN 97.50 Hz  
 IRRPW 45 usec  
 IRATN 511  
 DF FILE product-diyne-PhMe-diTMS(1H)-  
 SF TH5ATFG2  
 LKSET 61.60 KHz  
 LKF IN 79.0 Hz  
 LKLEV 180  
 LGAIN 27  
 LKPHS 250  
 LKSIG 1717  
 CSPED 13 Hz  
 FILDC  
 FILDF

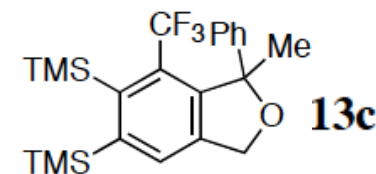

C:\WINNMR\DATA\Fluorine\Moriyasu\product-diyne-PhMe-diTMS (19F)-混. als

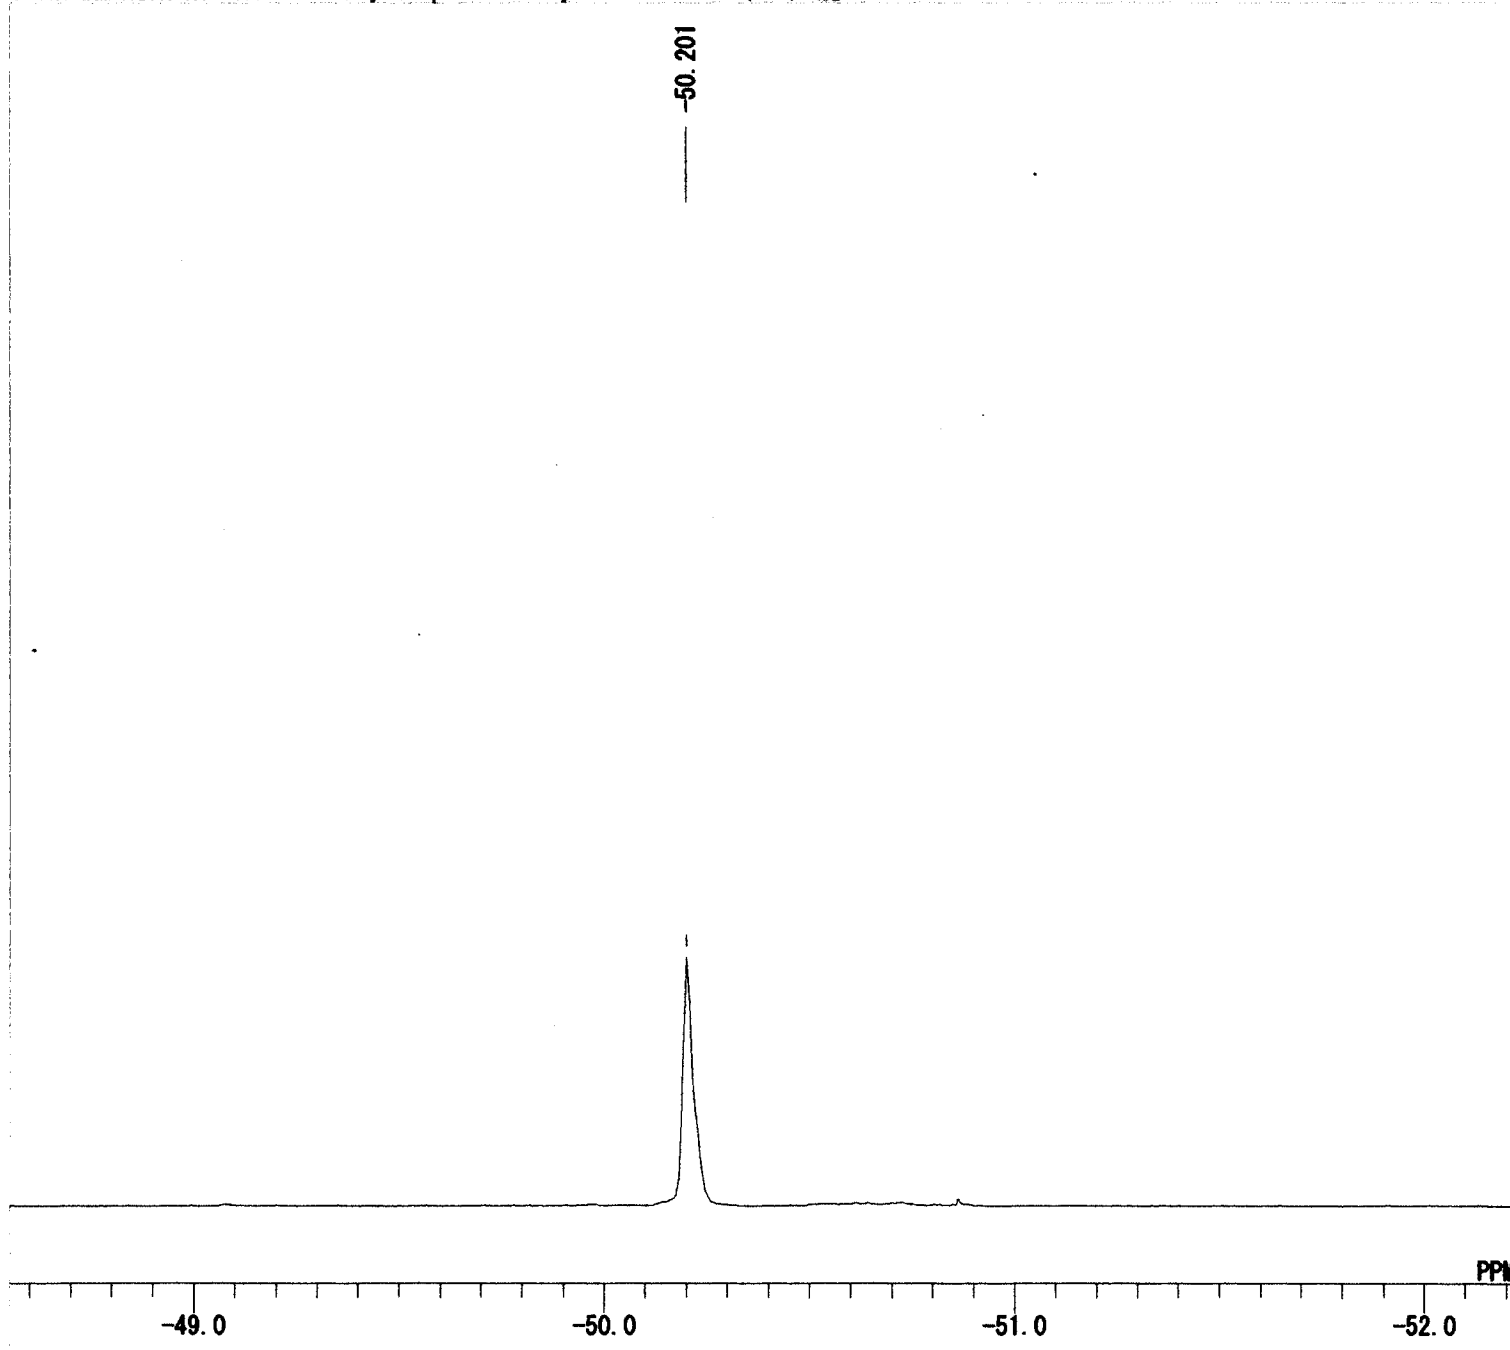

MENUF 19F  
OBNUC 19F  
OFR 376.05 MHz  
OBSET 139.60 KHz  
OBFIN 36.10 Hz  
PW1 6.00 usec  
DEADT 10.00 usec  
PREDL 0.20000 msec  
IWT 1.0000 msec  
POINT 32768  
SPO 32768  
TIMES 16  
DUMMY 1  
FREQU 80000.00 Hz  
FLT 40000 Hz  
DELAY 5.00 usec  
ACQTM 0.4096 sec  
PD 4.9500 sec  
ADBIT 16  
RGAIN 14  
BF 0.10 Hz  
T1 0.00  
T2 0.00  
T3 90.00  
T4 100.00  
EXMOD NON  
EXPCM NON:Single.coupled:PW1\_ACQTM.  
IRNUC 1H  
IFR 399.65 MHz  
IRSET 124.00 KHz  
IRFIN 10500.00 Hz  
IRRPW 45 usec  
IRATN 511  
DFILE product-diyne-PhMe-diTMS (19F)  
SF TH5ATFG2  
LKSET 61.60 KHz  
LKFIN 79.0 Hz  
LKLEV 180  
LGAIN 27  
LKPHS 250  
LKSIG 1636  
CSPED 12 Hz  
FILDC  
FILDF

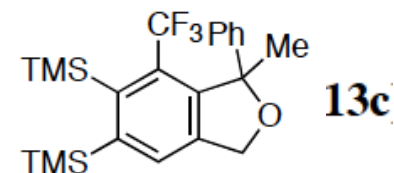

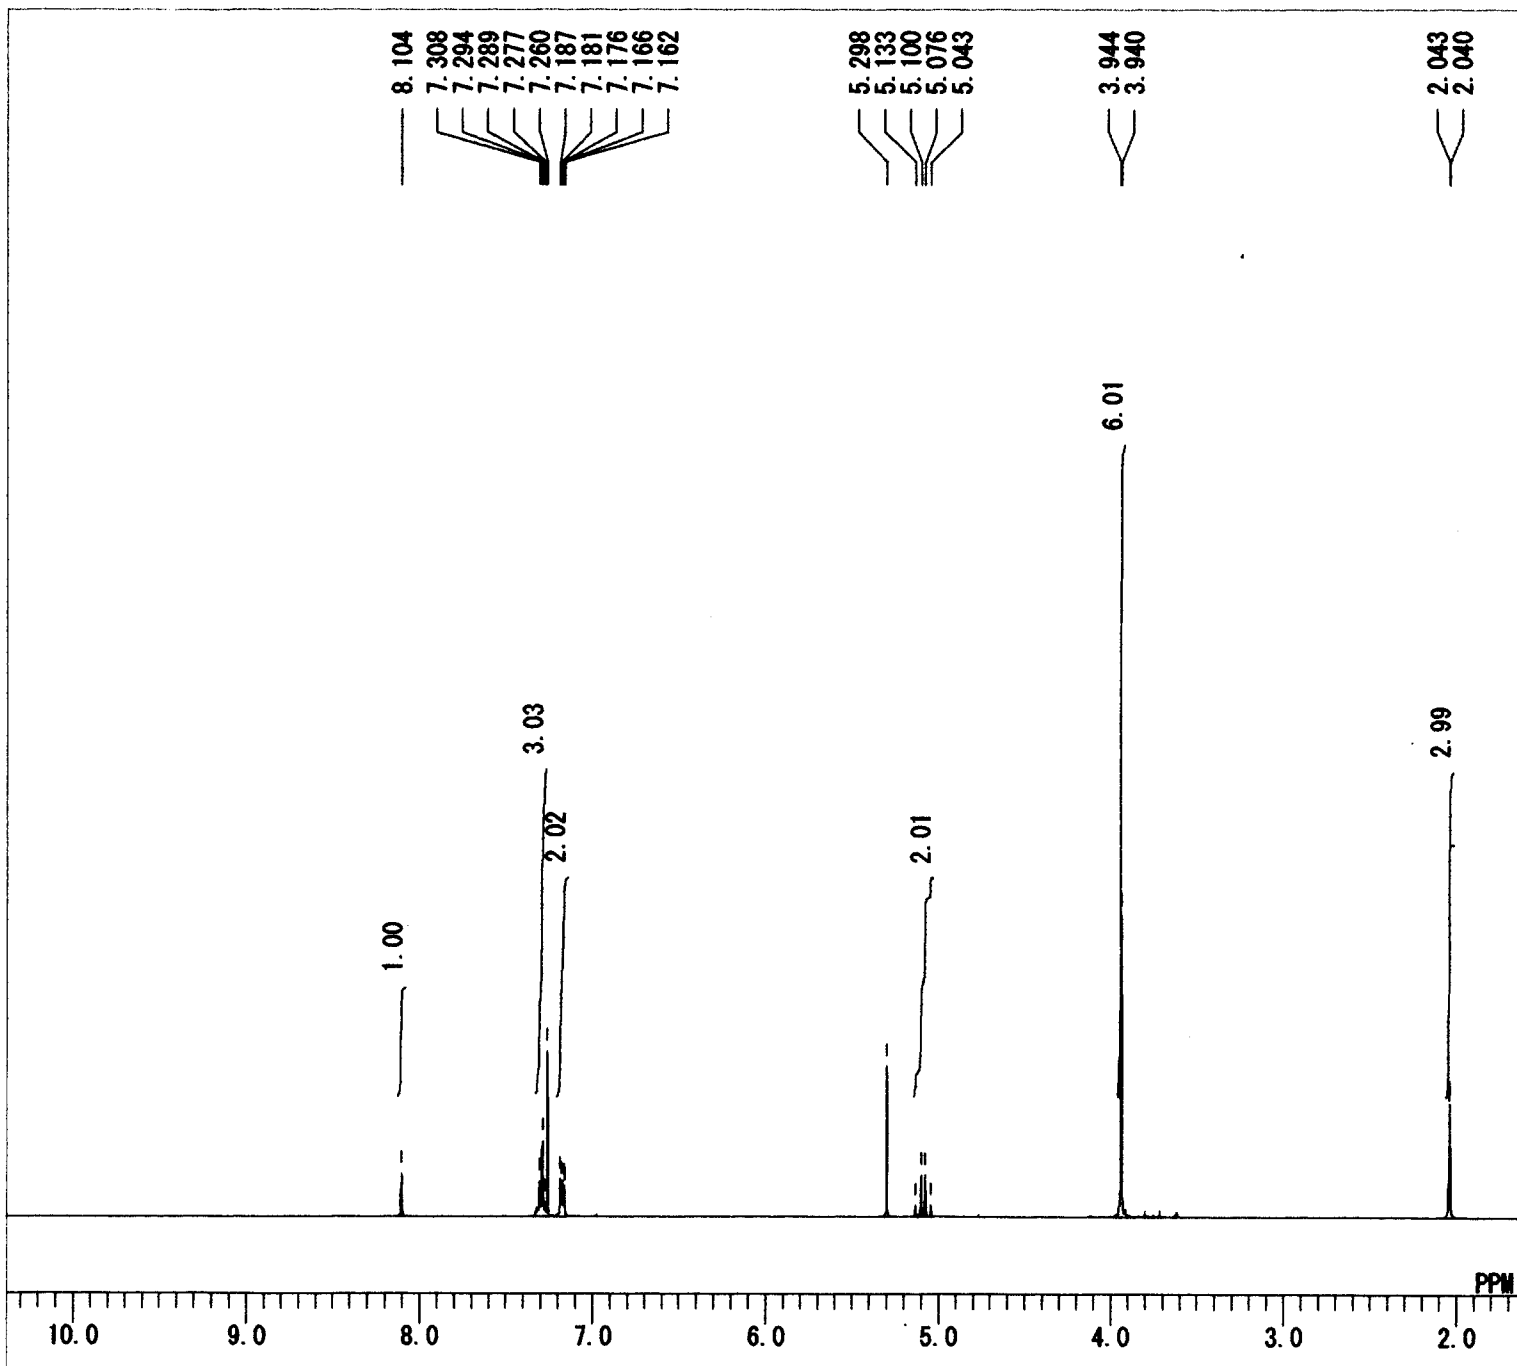

|       |                                 |
|-------|---------------------------------|
| MENUF | 1H                              |
| OBNUC | 1H                              |
| OFR   | 399.65 MHz                      |
| OBSET | 135.40 KHz                      |
| OBFIN | 24.90 Hz                        |
| PW1   | 5.80 usec                       |
| DEADT | 72.10 usec                      |
| PREDL | 0.20000 msec                    |
| IWT   | 1.0000 msec                     |
| POINT | 16384                           |
| SPO   | 16384                           |
| TIMES | 8                               |
| DUMMY | 1                               |
| FREQU | 7992.01 Hz                      |
| FLT   | 4000 Hz                         |
| DELAY | 50.00 usec                      |
| ACQTM | 2.0501 sec                      |
| PD    | 4.9500 sec                      |
| ADBIT | 16                              |
| RGAIN | 19                              |
| BF    | 0.10 Hz                         |
| T1    | 0.00                            |
| T2    | 0.00                            |
| T3    | 90.00                           |
| T4    | 100.00                          |
| EXMOD | NON                             |
| EXPCM | NON:Single.coupled:PW1_ACQTM.   |
| IRNUC | 1H                              |
| IFR   | 399.65 MHz                      |
| IRSET | 136.90 KHz                      |
| IRFIN | 97.50 Hz                        |
| IRRPW | 45 usec                         |
| IRATN | 511                             |
| DFILE | CF3-Diyne (PhMe)-H+Di (CO2Me) A |
| SF    | TH5ATFG2                        |
| LKSET | 61.60 KHz                       |
| LKFIN | 79.0 Hz                         |
| LKLEV | 180                             |
| LGA1N | 23                              |
| LKPHS | 250                             |
| LKSIG | 1090                            |
| CSPED | 12 Hz                           |
| FILDG |                                 |
| FILDF |                                 |

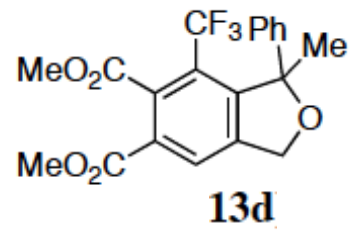

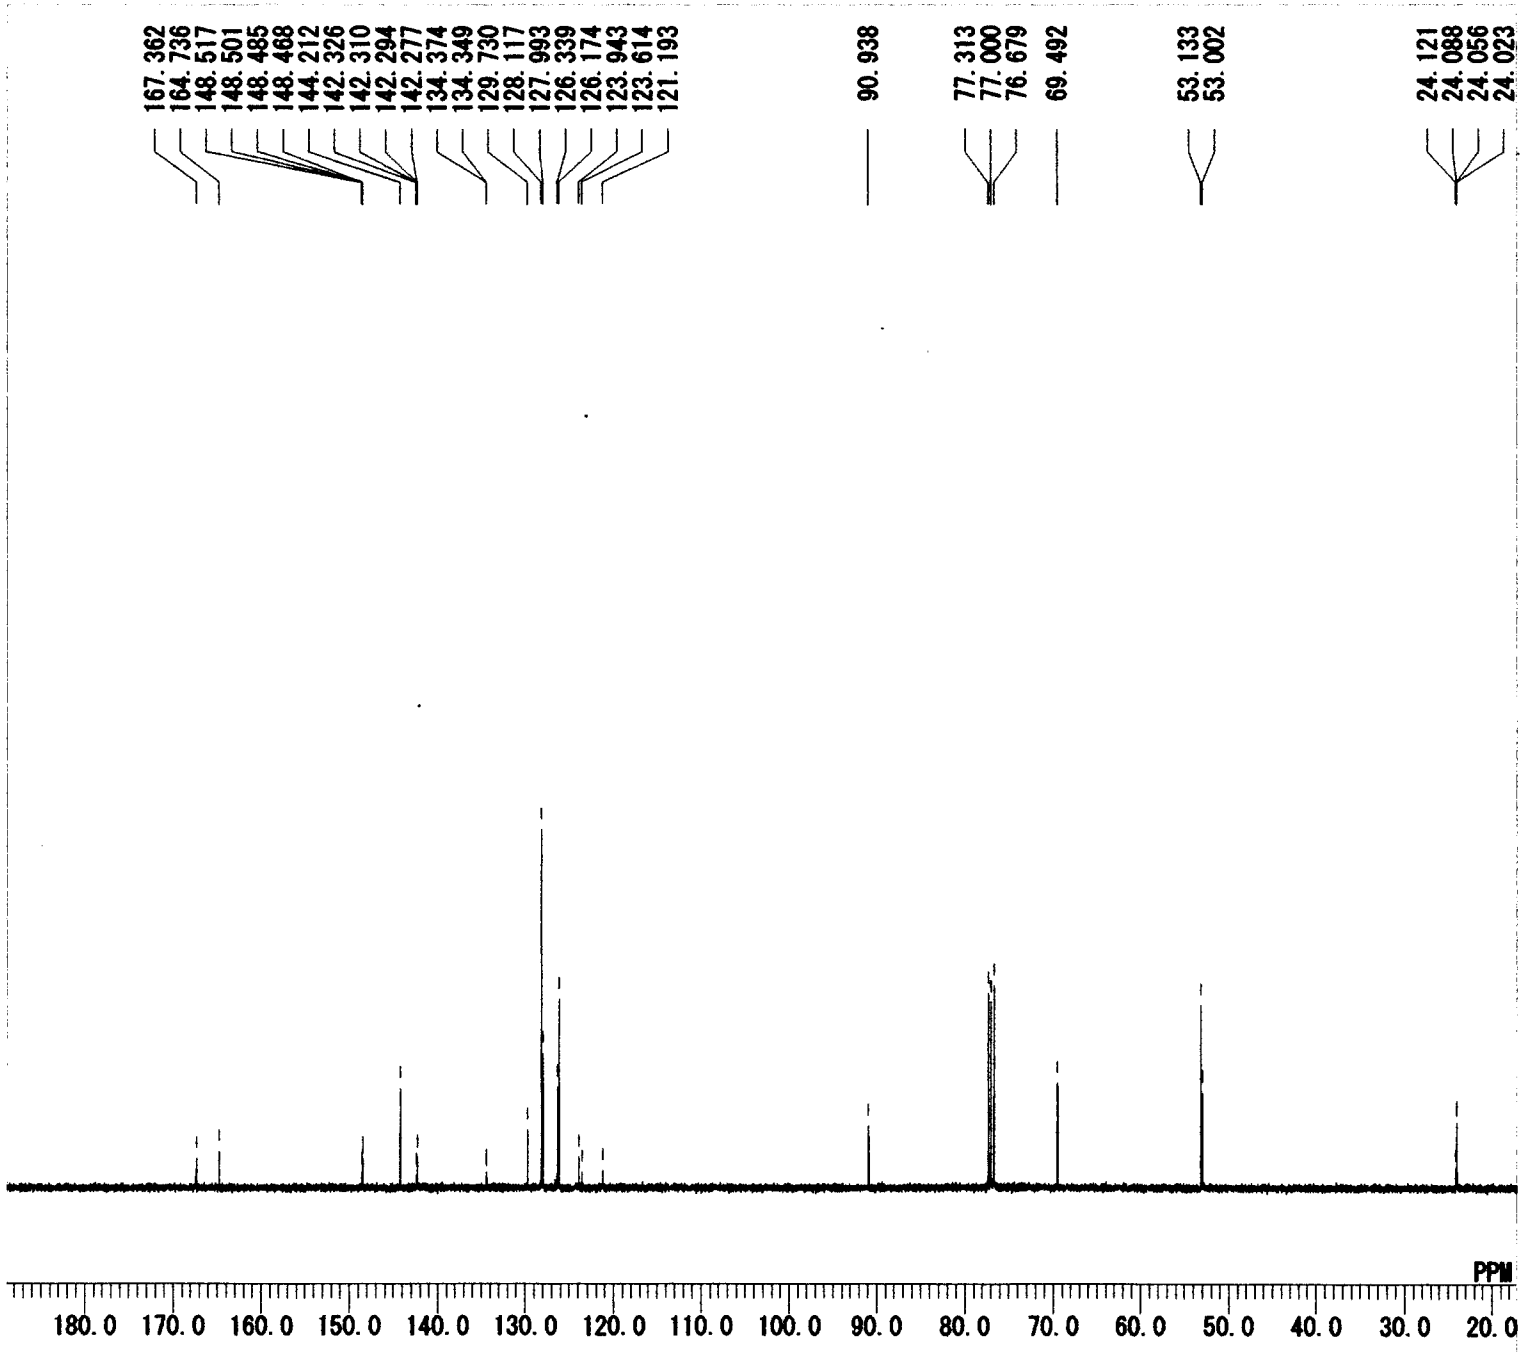

MENUF 13C  
 OBNUC 13C  
 OFR 100.40 MHz  
 OBSSET 125.00 KHz  
 OBF IN 10500.00 Hz  
 PW1 6.00 usec  
 DEADT 19.10 usec  
 PREDL 0.20000 msec  
 IWT 1.0000 msec  
 POINT 32768  
 SPO 32768  
 TIMES 512  
 DUMMY 1  
 FREQU 27118.64 Hz  
 FLT 13550 Hz  
 DELAY 14.80 usec  
 ACQTM 1.2083 sec  
 PD 1.7920 sec  
 ADBIT 16  
 RGAIN 25  
 BF 0.10 Hz  
 T1 0.00  
 T2 0.00  
 T3 90.00  
 T4 100.00  
 EXMOD BCM  
 EXPCM Bilevel. complete. decoupling:  
 IRNUC 1H  
 IFR 399.65 MHz  
 IRSET 124.00 KHz  
 IRF IN 10500.00 Hz  
 IRRPW 45 usec  
 IRATN 511  
 DF FILE product-diyne-PhMe-di (CO2Me)-  
 SF TH5ATFG2  
 LKSET 61.60 KHz  
 LKF IN 79.0 Hz  
 LKLEV 180  
 LGAIN 23  
 LKPHS 250  
 LKSIG 809  
 CSPED 13 Hz  
 FILDC  
 FILDF

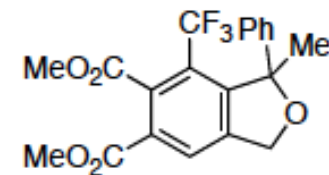

13d

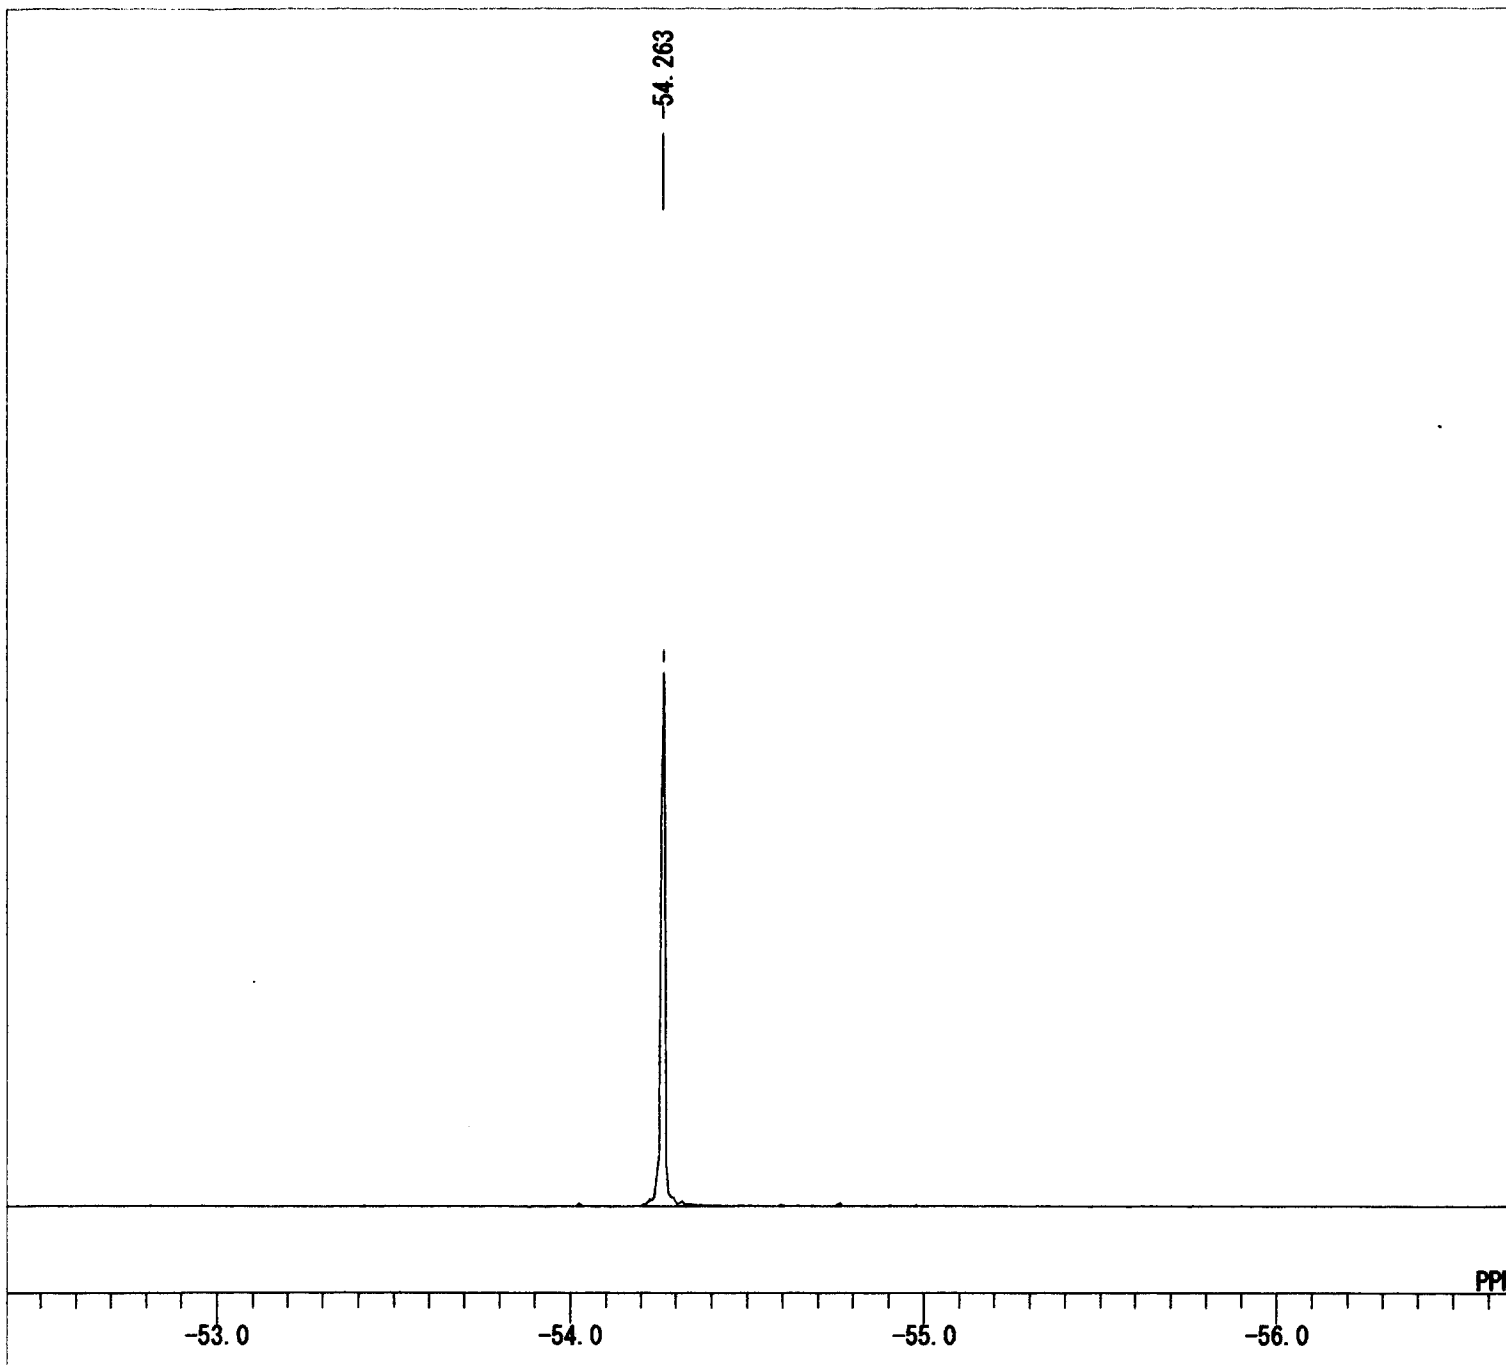

```

MENUF 19F
OBNUC 19F
OFR      376.05 MHz
OBSET    139.60 KHz
OBF IN   36.10 Hz
PW1      6.00 usec
DEADT    10.00 usec
PREDL    0.20000 msec
IWT      1.0000 msec
POINT    32768
SPO      32768
TIMES    16
DUMMY    1
FREQU    80000.00 Hz
FLT      40000 Hz
DELAY    5.00 usec
ACQTM    0.4096 sec
PD       4.9500 sec
ADBIT    16
RGAIN    14
BF        0.10 Hz
T1        0.00
T2        0.00
T3        90.00
T4       100.00
EXMOD    NON
EXPCM    NON:Single.coupled:PW1_ACQTM
IRNUC    1H
IFR      399.65 MHz
IRSET    124.00 KHz
IRF IN   10500.00 Hz
IRRPW    45 usec
IRATN    511
DFILE    CF3-Diyne(PhMe)-H+Di(CO2Me)A
SF       TH5ATFG2
LKSET    61.60 KHz
LKFIN    79.0 Hz
LKLEV    180
LGA IN   23
LKPHS    250
LKSIG    1090
CSPED    9 Hz
FILDC
FILDF

```

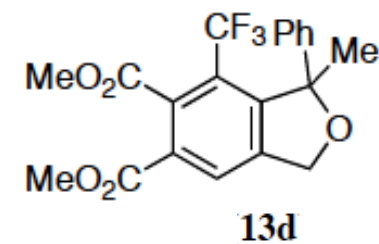

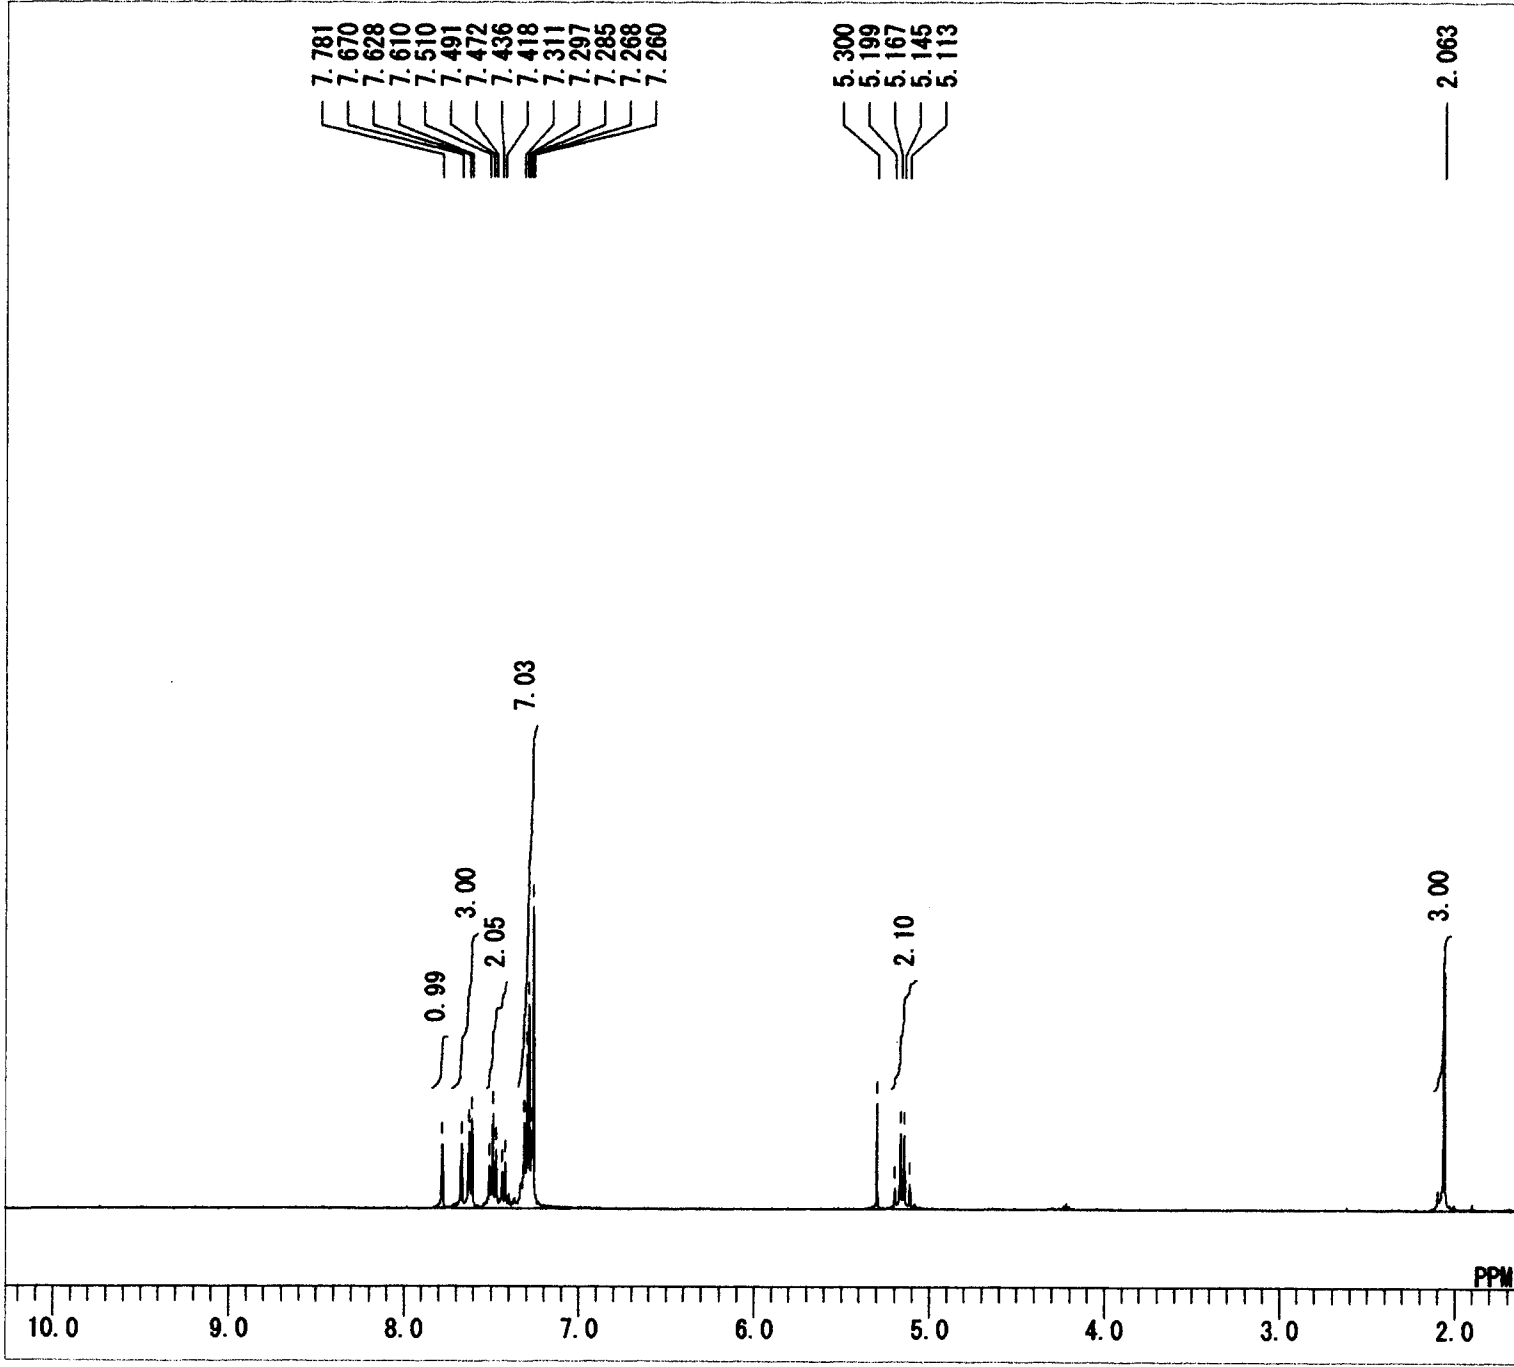

```

MENUF 1H
OBNUC 1H
OFR 399.65 MHz
OBSET 135.40 KHz
OBFIN 24.90 Hz
PW1 5.80 usec
DEADT 72.10 usec
PREDL 0.20000 msec
IWT 1.0000 msec
POINT 16384
SPO 16384
TIMES 8
DUMMY 1
FREGU 7992.01 Hz
FLT 4000 Hz
DELAY 50.00 usec
ACQTM 2.0501 sec
PD 4.9500 sec
ADBIT 16
RGAIN 19
BF 0.10 Hz
T1 0.00
T2 0.00
T3 90.00
T4 100.00
EXMOD NON
EXPCM NON:Single.coupled:PW1_ACQTM
IRNUC 1H
IFR 399.65 MHz
IRSET 136.90 KHz
IRFIN 97.50 Hz
IRRPW 45 usec
IRATN 511
DFILE CF3-Diyne (PhMe)-H+Phenylacet.
SF TH5ATFG2
LKSET 61.60 KHz
LKFIN 79.0 Hz
LKLEV 180
LGAIN 24
LKPHS 250
LKSIG 1303
CSPED 11 Hz
FILDC
FILDF

```

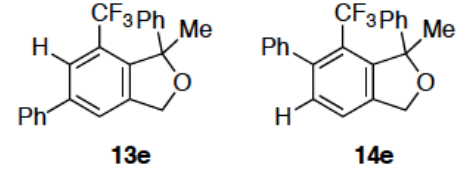



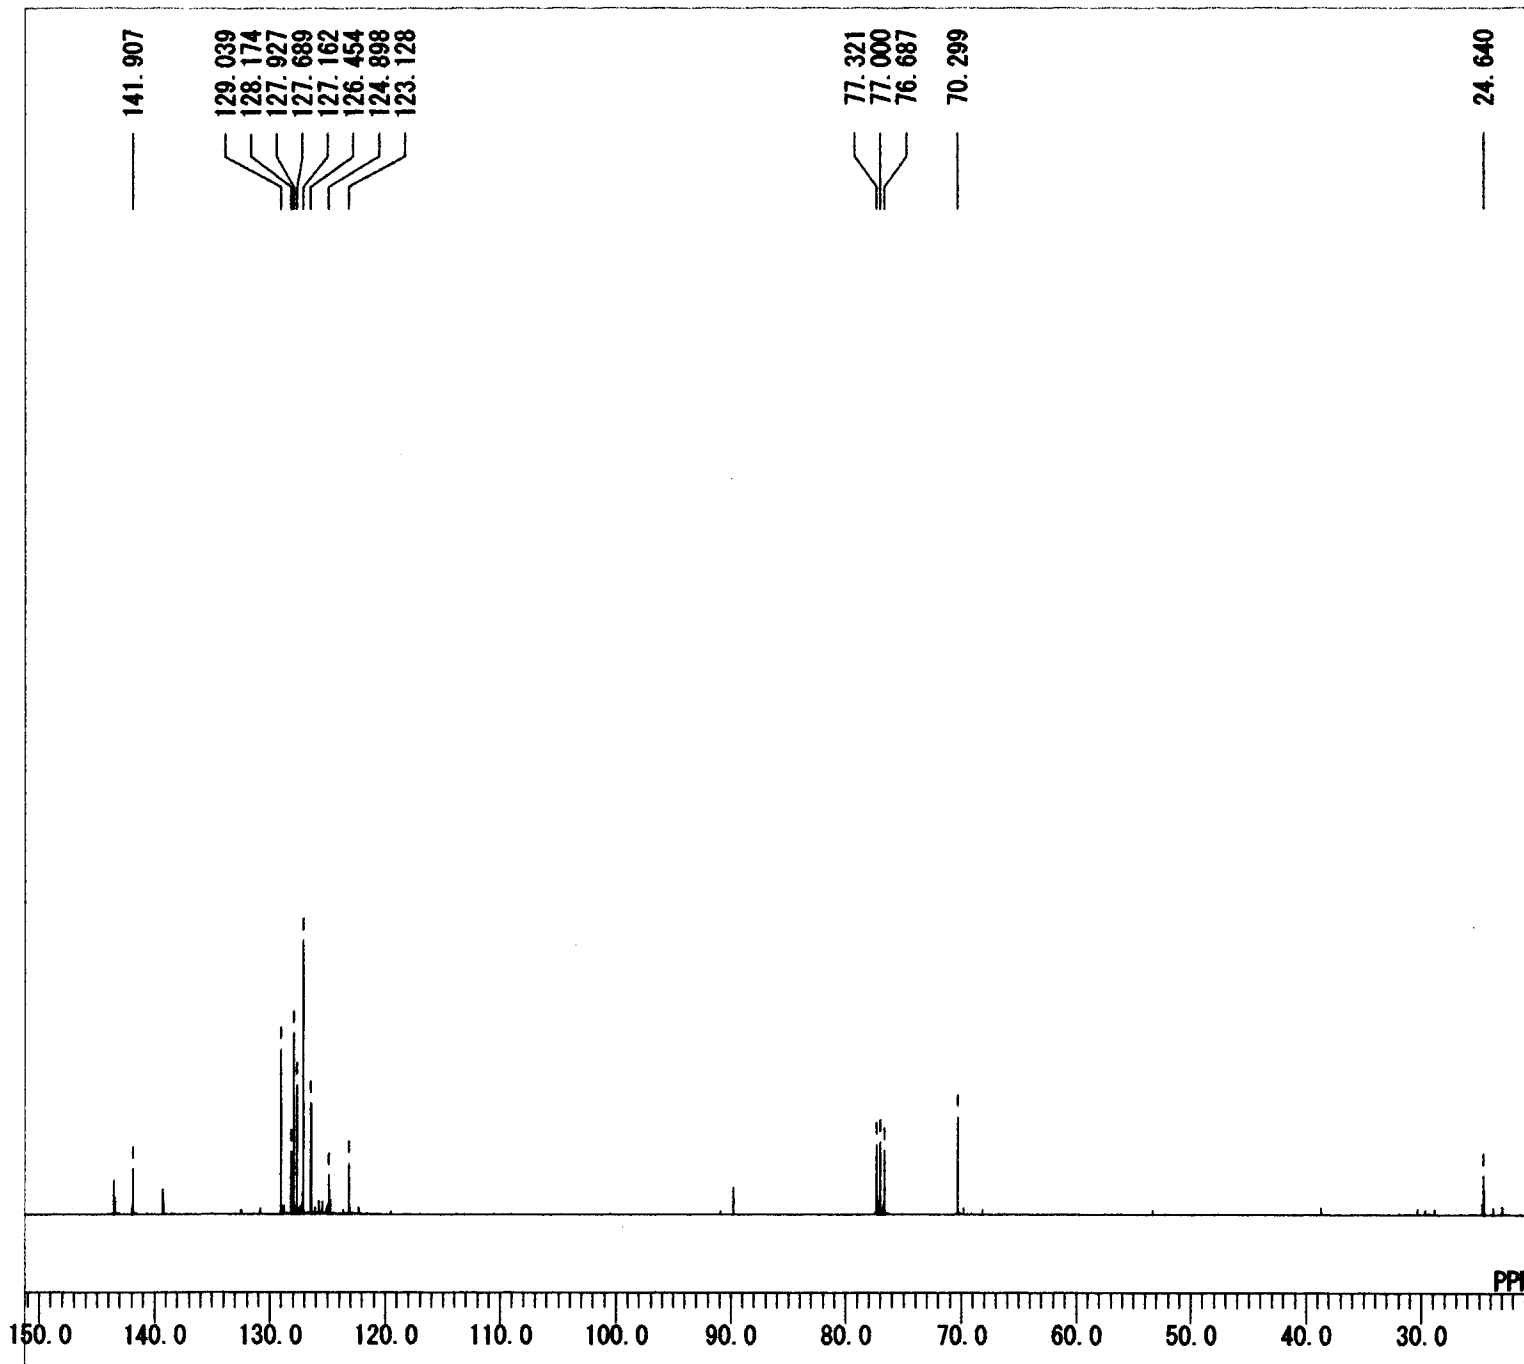

MENUF 13C  
 OBNUC 13C  
 OFR 100.40 MHz  
 OBSET 125.00 KHz  
 OBFIN 10500.00 Hz  
 PW1 6.00 usec  
 DEADT 19.10 usec  
 PREDL 0.20000 msec  
 IWT 1.0000 msec  
 POINT 32768  
 SPO 32768  
 TIMES 100000000  
 DUMMY 1  
 FREQU 27118.64 Hz  
 FLT 13550 Hz  
 DELAY 14.80 usec  
 ACQTM 1.2083 sec  
 PD 1.7920 sec  
 ADBIT 16  
 RGA IN 25  
 BF 0.10 Hz  
 T1 0.00  
 T2 0.00  
 T3 90.00  
 T4 100.00  
 EXMOD BCM  
 EXPCM Bilevel. complete. decoupling: {  
 IRNUC 1H  
 IFR 399.65 MHz  
 IRSET 124.00 KHz  
 IRFIN 10500.00 Hz  
 IRRPW 45 usec  
 IRATN 511  
 DFILE CF3-Diyne (PhMe)-H+Phenylacet;  
 SF TH5ATFG2  
 LKSET 61.60 KHz  
 LKFIN 79.0 Hz  
 LKLEV 180  
 LGAIN 25  
 LKPHS 250  
 LKSIG 1539  
 CSPED 12 Hz  
 FILDC  
 FILDf

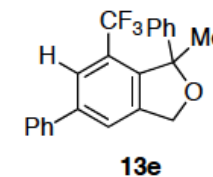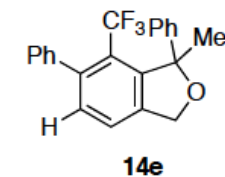

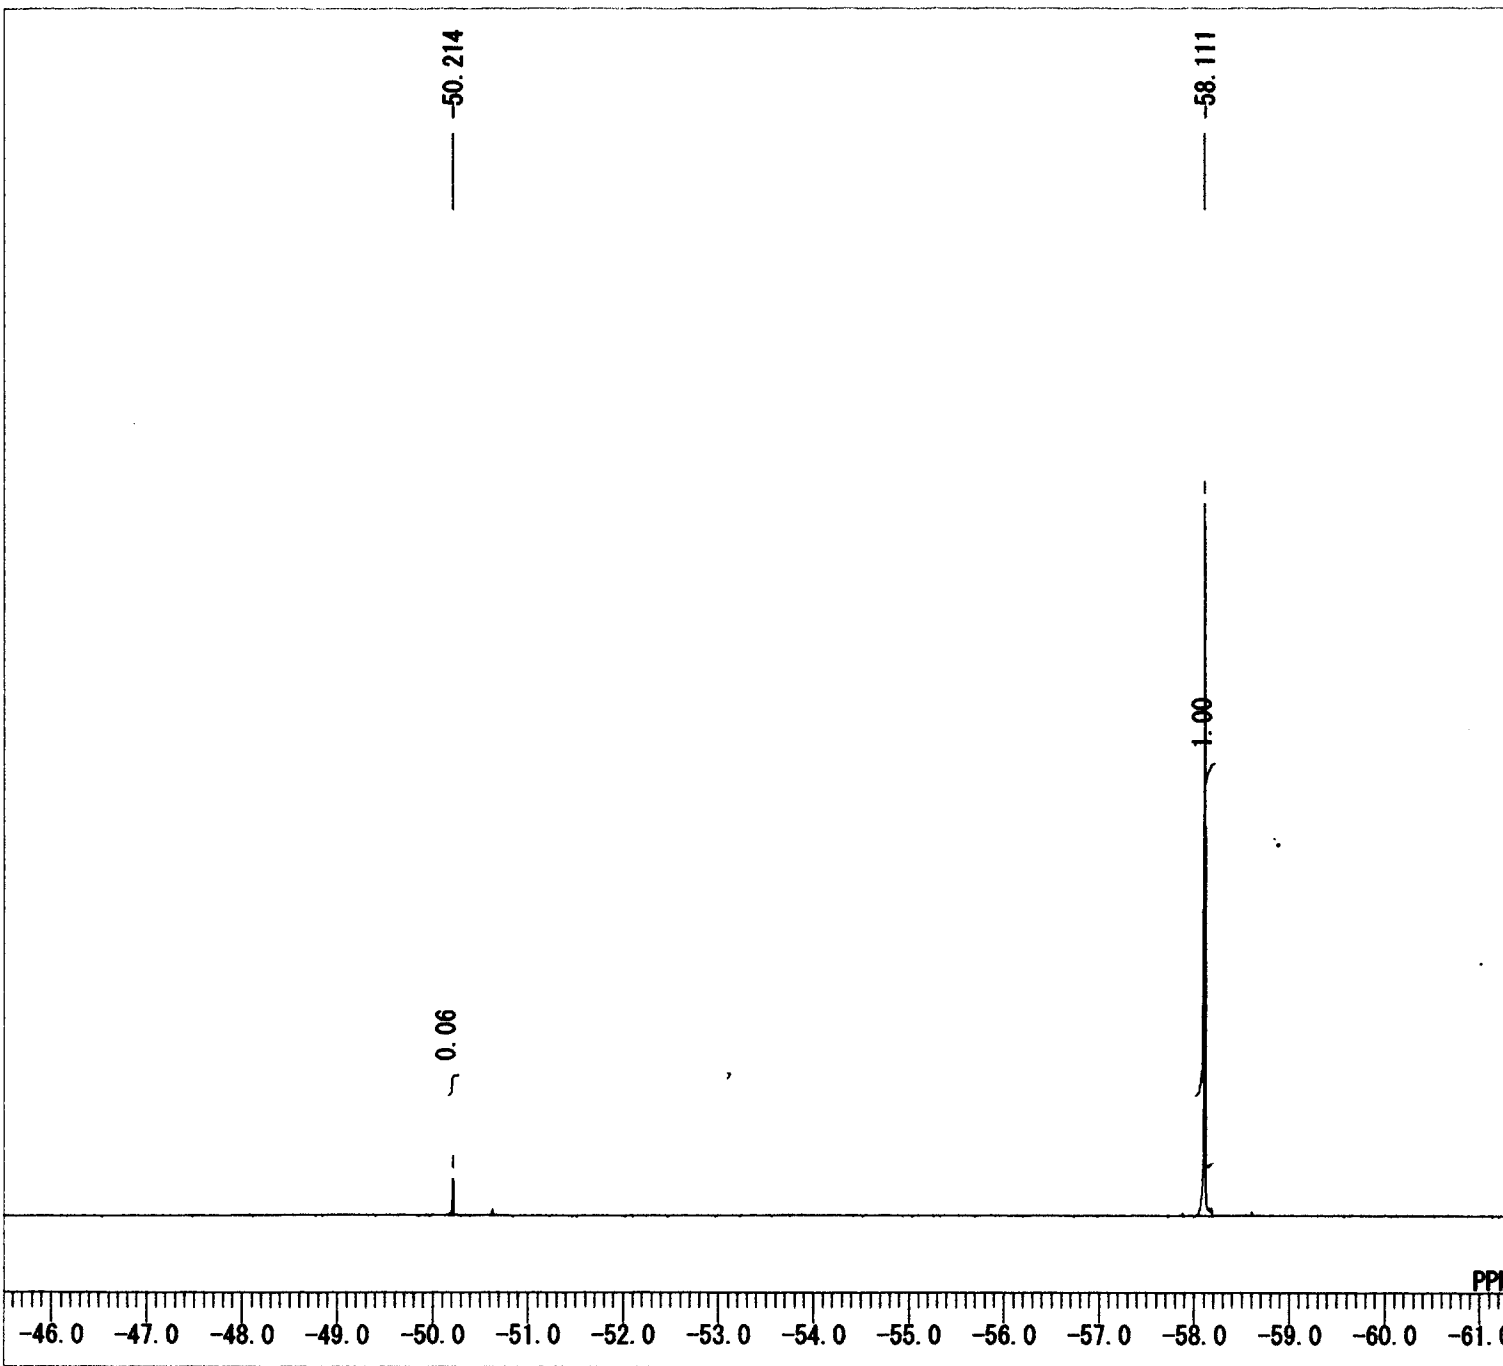

```

MENUF 19F
OBNUC 19F
OFR 376.05 MHz
OBSET 139.60 KHz
OBFIN 36.10 Hz
PW1 6.00 usec
DEADT 10.00 usec
PREDL 0.20000 msec
IWT 1.0000 msec
POINT 32768
SPO 32768
TIMES 16
DUMMY 1
FREQU 80000.00 Hz
FLT 40000 Hz
DELAY 5.00 usec
ACQTM 0.4096 sec
PD 4.9500 sec
ADBIT 16
RGAIN 14
BF 0.10 Hz
T1 0.00
T2 0.00
T3 90.00
T4 100.00
EXMOD NON
EXPCM NON:Single.coupled:PW1_ACQTM.
IRNUC 1H
IFR 399.65 MHz
IRSET 124.00 KHz
IRFIN 10500.00 Hz
IRRPW 45 usec
IRATN 511
DFILE CF3-Diyne (PhMe)-H+Phenylacet
SF TH5ATFG2
LKSET 61.60 KHz
LKFIN 79.0 Hz
LKLEV 180
LGAIN 24
LKPHS 250
LKSIG 1304
CSPED 12 Hz
FILDC
FILDF
  
```

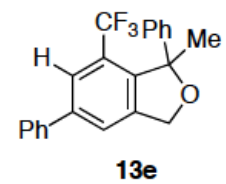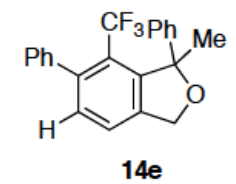

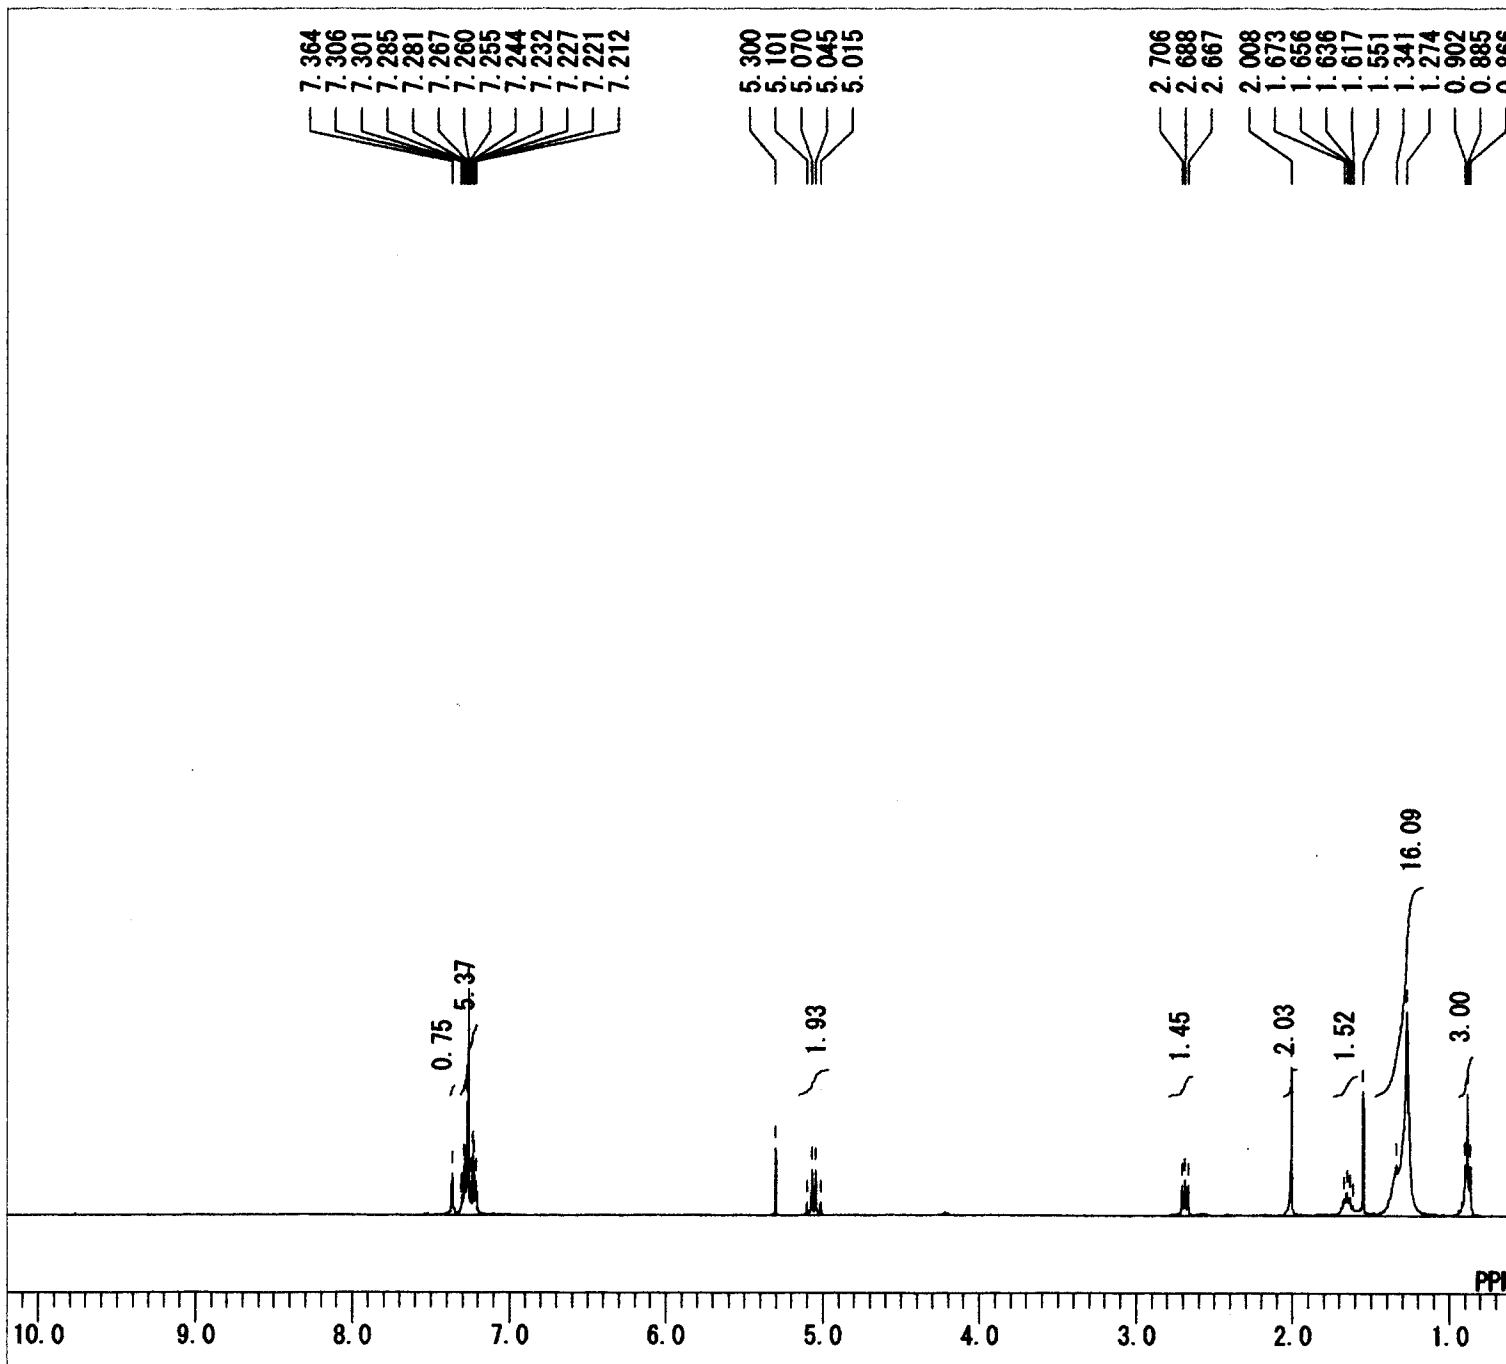

MENUF 1H  
 OBNUC 1H  
 OFR 399.65 MHz  
 OBSET 135.40 KHz  
 OBFIN 24.90 Hz  
 PW1 5.80 usec  
 DEADT 72.10 usec  
 PREDL 0.20000 msec  
 IWT 1.0000 msec  
 POINT 16384  
 SPO 16384  
 TIMES 8  
 DUMMY 1  
 FREQU 7992.01 Hz  
 FLT 4000 Hz  
 DELAY 50.00 usec  
 ACQTM 2.0501 sec  
 PD 4.9500 sec  
 ADBIT 16  
 RGAIN 17  
 BF 0.10 Hz  
 T1 0.00  
 T2 0.00  
 T3 90.00  
 T4 100.00  
 EXMOD NON  
 EXPCM NON:Single.coupled:PW1\_ACQTM  
 IRNUC 1H  
 IFR 399.65 MHz  
 IRSET 136.90 KHz  
 IRFIN 97.50 Hz  
 IRRPW 45 usec  
 IRATN 511  
 DFIL CF3-Diyne (PhMe)-H+1-Decyne-(  
 SF TH5ATFG2  
 LKSET 61.60 KHz  
 LKFIN 79.0 Hz  
 LKLEV 180  
 LGAIN 26  
 LKPHS 250  
 LKSIG 2254  
 CSPED 14 Hz  
 FILDC  
 FILDF

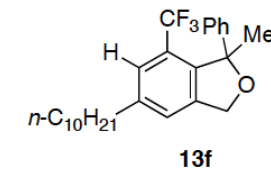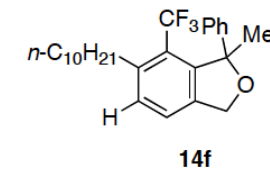

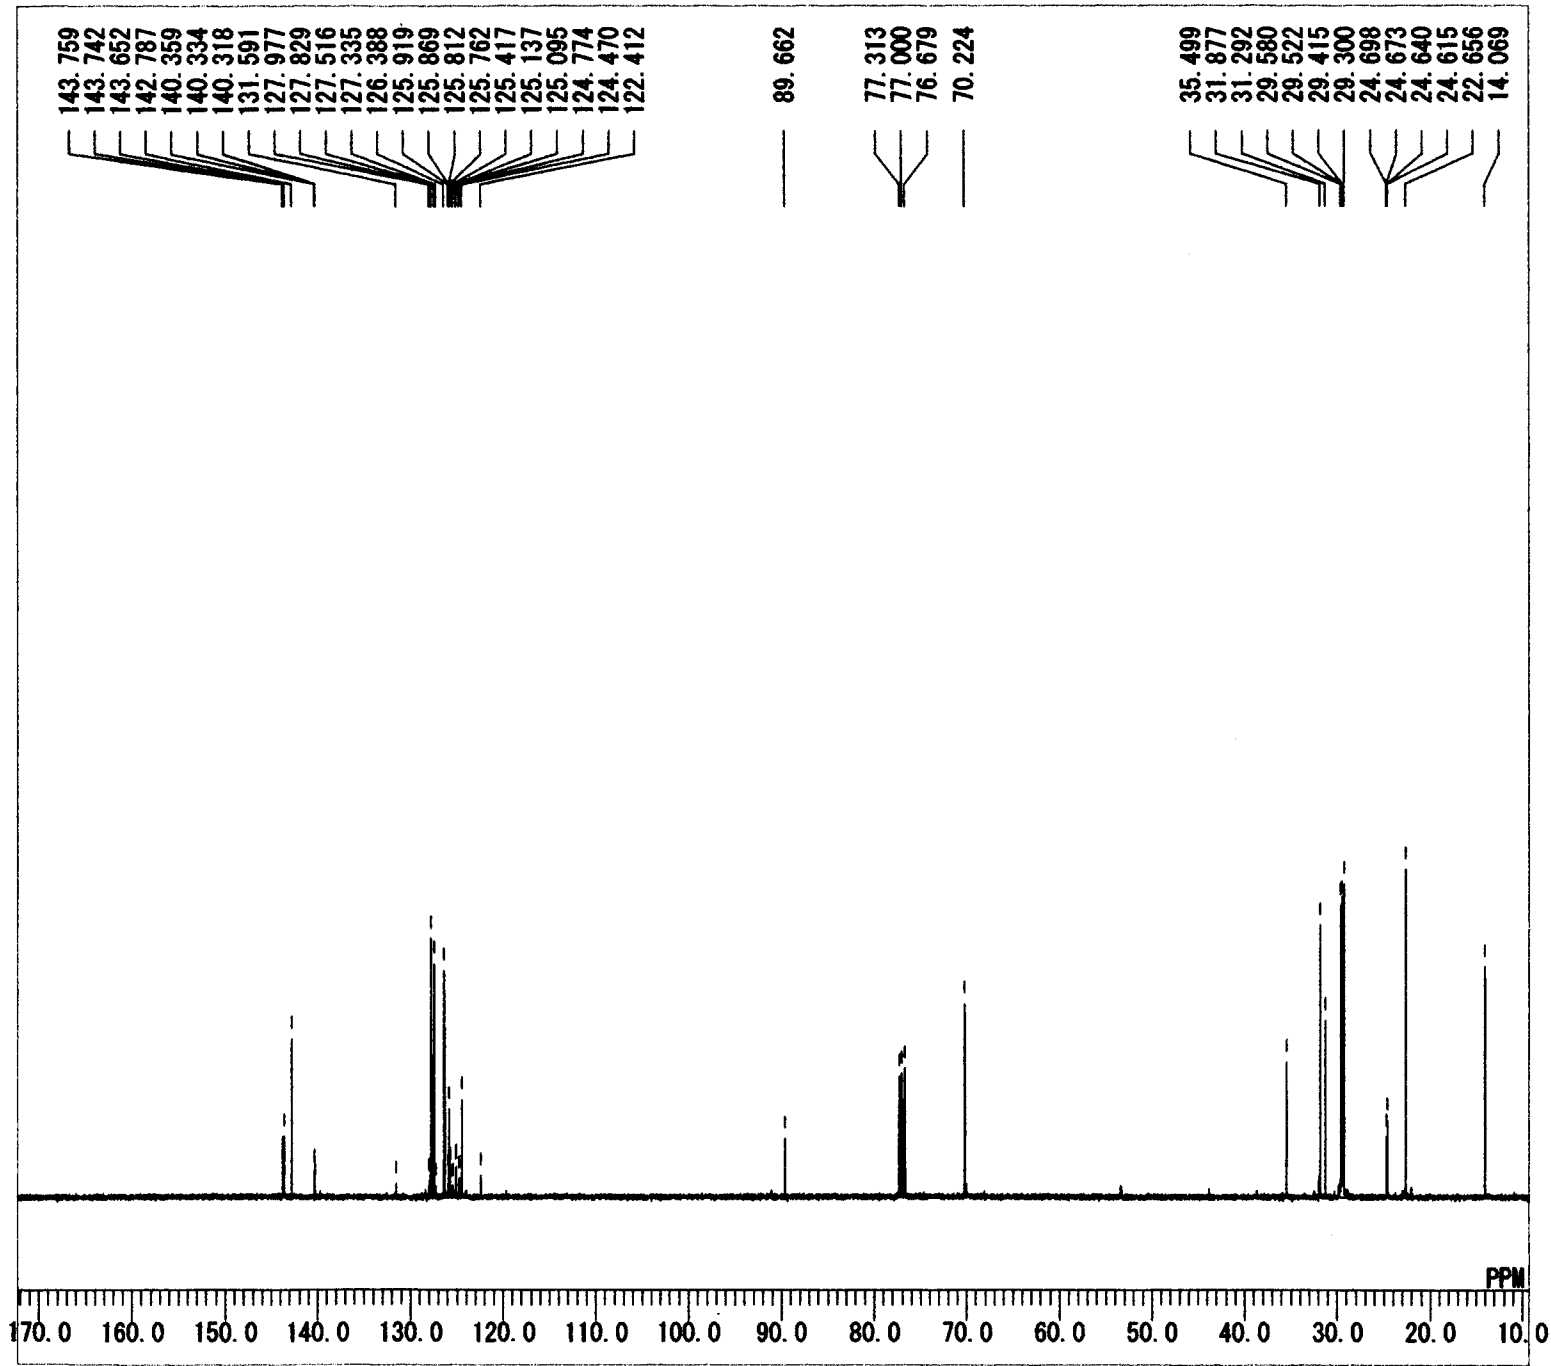

```

MENUF 13C
OBNUC 13C
OFR 100.40 MHz
OBSET 125.00 KHz
OBF IN 10500.00 Hz
PW1 6.00 usec
DEADT 19.10 usec
PREDL 0.20000 msec
IWT 1.0000 msec
POINT 32768
SPO 32768
TIMES 512
DUMMY 1
FREQU 27118.64 Hz
FLT 13550 Hz
DELAY 14.80 usec
ACQTM 1.2083 sec
PD 1.7920 sec
ADBIT 16
RGAIN 25
BF 0.10 Hz
T1 0.00
T2 0.00
T3 90.00
T4 100.00
EXMOD BCM
EXPCM Bi-level, complete, decoupling:
IRNUC 1H
IFR 399.65 MHz
IRSET 124.00 KHz
IRF IN 10500.00 Hz
IRRPW 45 usec
IRATN 511
DFILE CF3-Diyne (PhMe)-H+1-Decyne-(
SF TH5ATFG2
LKSET 61.60 KHz
LKFIN 79.0 Hz
LKLEV 180
LGA IN 23
LKPHS 250
LKSIG 761
CSPED 14 Hz
FILDC
FILDF

```

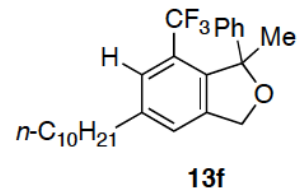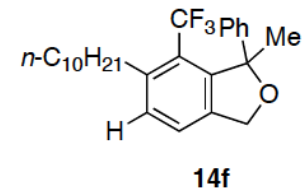

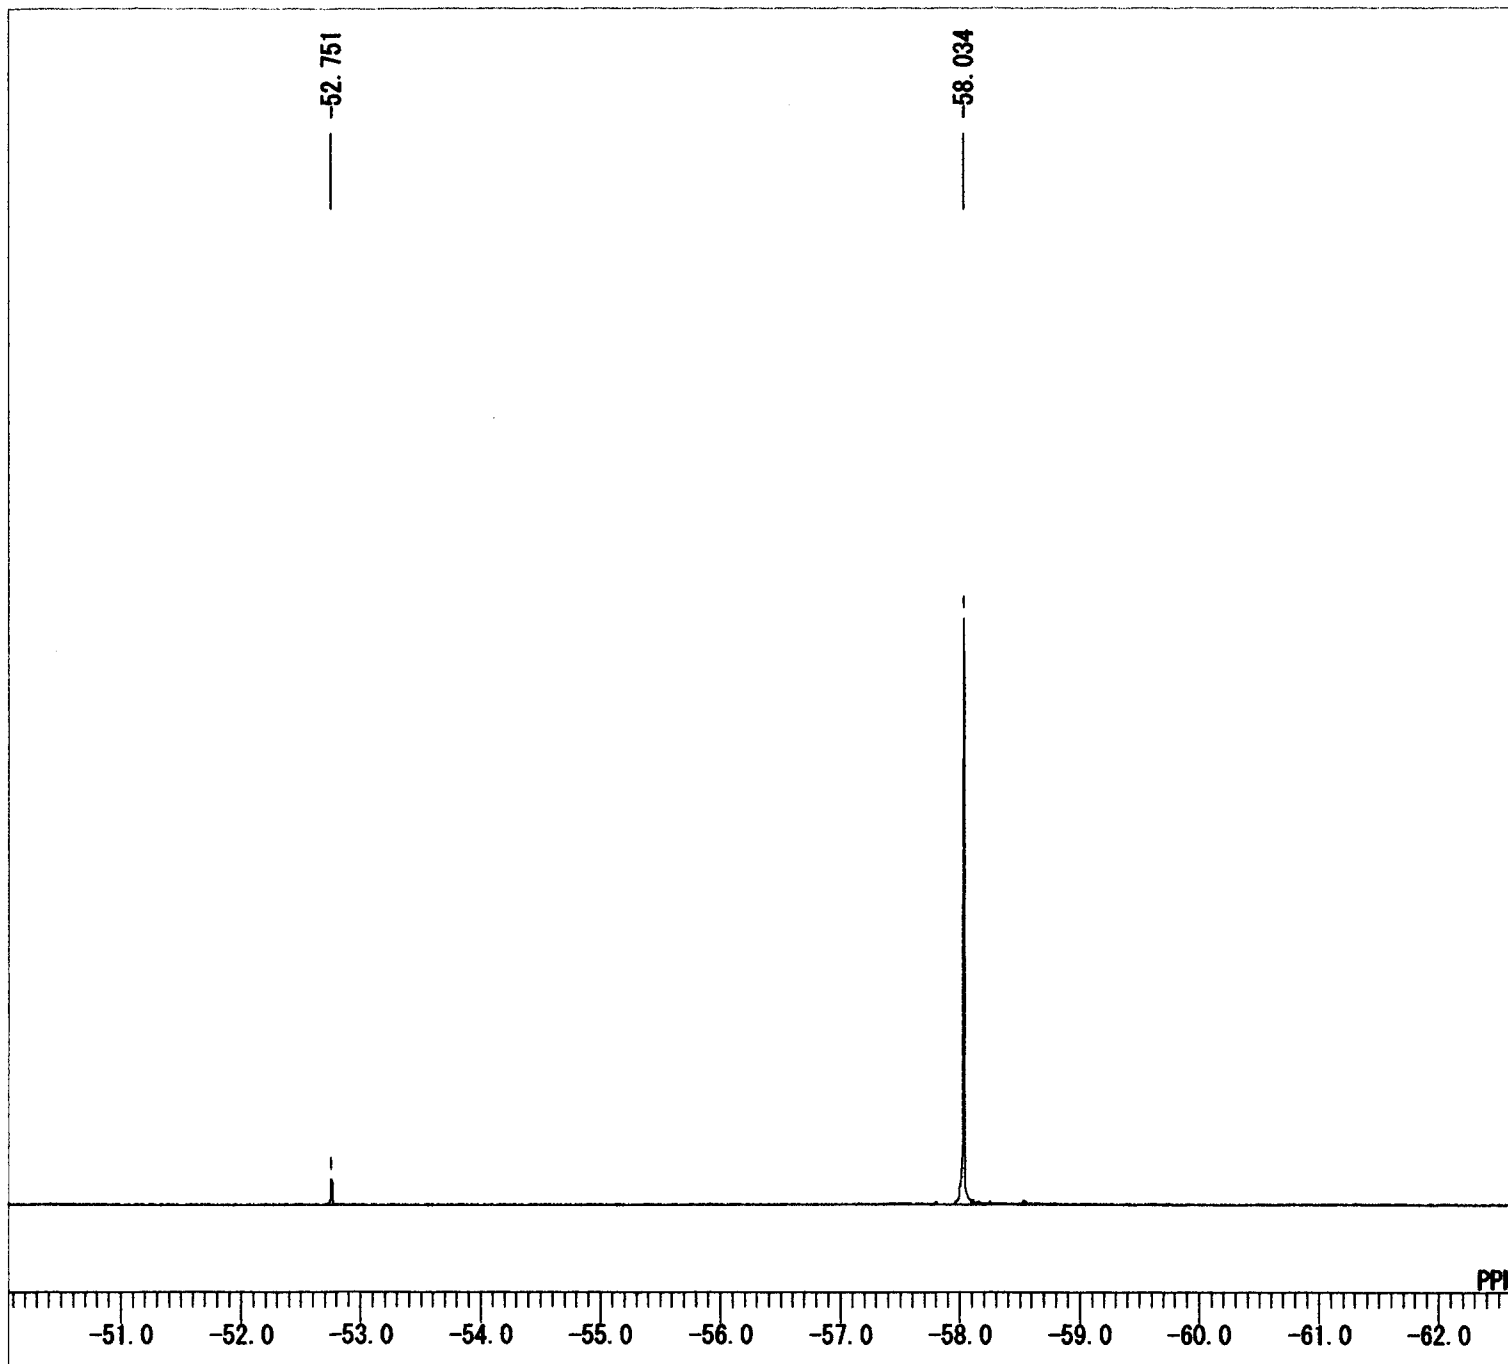

```

MENUF 19F
OBNUC 19F
OFR 376.05 MHz
OBSET 139.60 KHz
OBF IN 36.10 Hz
PW1 6.00 usec
DEADT 10.00 usec
PREDL 0.20000 msec
IWT 1.0000 msec
POINT 32768
SPO 32768
TIMES 16
DUMMY 1
FREQU 80000.00 Hz
FLT 40000 Hz
DELAY 5.00 usec
ACQTM 0.4096 sec
PD 4.9500 sec
ADBIT 16
RGAIN 14
BF 0.10 Hz
T1 0.00
T2 0.00
T3 90.00
T4 100.00
EXMOD NON
EXPCM NON:Single.coupled:PW1_ACQTM.
IRNUC 1H
IFR 399.65 MHz
IRSET 124.00 KHz
IRFIN 10500.00 Hz
IRRPW 45 usec
IRATN 511
DFILE CF3-Diyne (PhMe)-H+1-Decyne-(
SF TH5ATFG2
LKSET 61.60 KHz
LKFIN 79.0 Hz
LKLEV 180
LGAIN 26
LKPHS 250
LKSIG 2257
CSPED 13 Hz
FILDC
FILDF

```

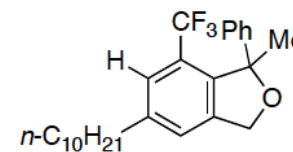

13f

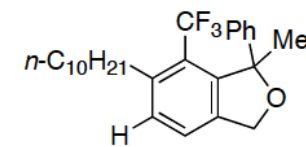

14f

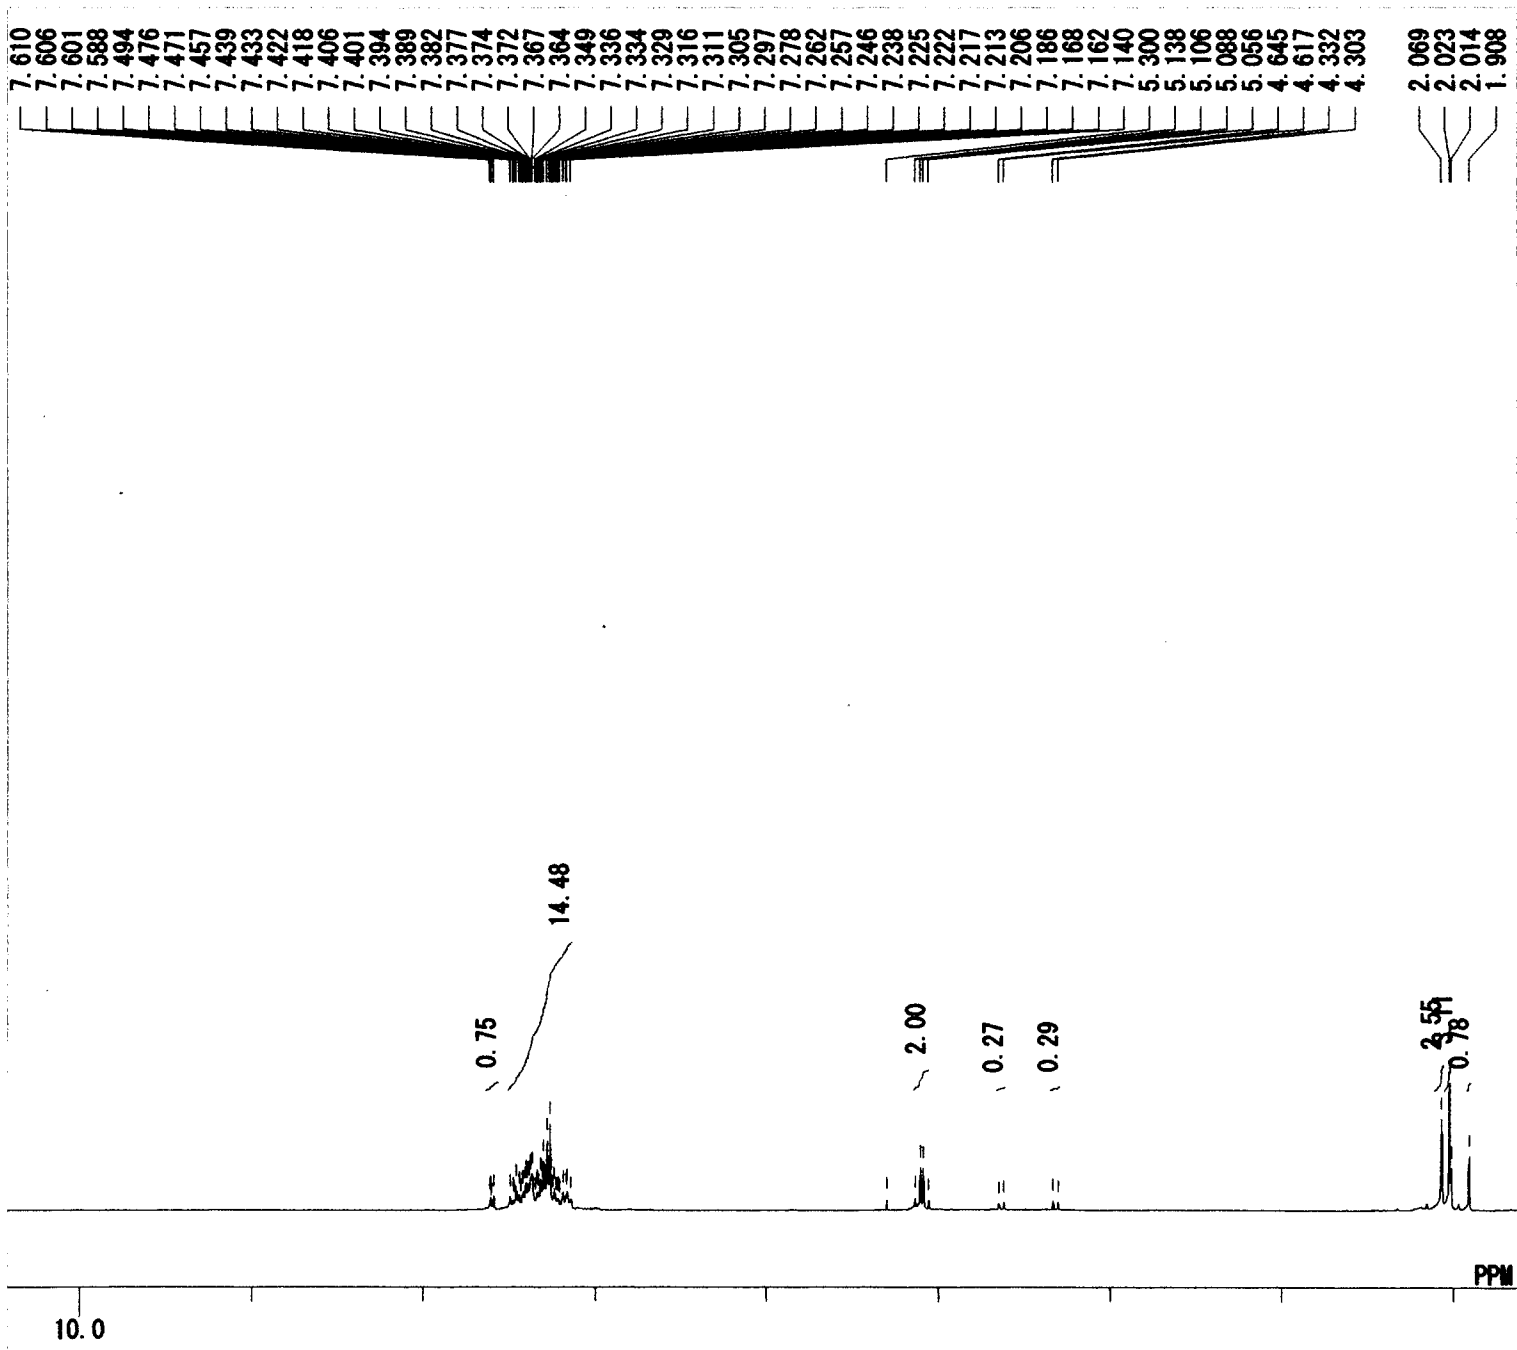

|       |                              |
|-------|------------------------------|
| MENUF | 1H                           |
| OBNUC | 1H                           |
| OFR   | 399.65 MHz                   |
| OBSET | 135.40 KHz                   |
| OBFIN | 24.90 Hz                     |
| PW1   | 5.80 usec                    |
| DEADT | 72.10 usec                   |
| PREDL | 0.20000 msec                 |
| IWT   | 1.0000 msec                  |
| POINT | 16384                        |
| SPO   | 16384                        |
| TIMES | 8                            |
| DUMMY | 1                            |
| FREQU | 7992.01 Hz                   |
| FLT   | 4000 Hz                      |
| DELAY | 50.00 usec                   |
| ACQTM | 2.0501 sec                   |
| PD    | 4.9500 sec                   |
| ADBIT | 16                           |
| RGAIN | 17                           |
| BF    | 0.10 Hz                      |
| T1    | 0.00                         |
| T2    | 0.00                         |
| T3    | 90.00                        |
| T4    | 100.00                       |
| EXMOD | NON                          |
| EXPCM | NON:Single.coupled:PW1_ACQTM |
| IRNUC | 1H                           |
| IFR   | 399.65 MHz                   |
| IRSET | 136.90 KHz                   |
| IRFIN | 97.50 Hz                     |
| IRRPW | 45 usec                      |
| IRATN | 511                          |
| DFILE | product-diyne-PhMe-alkyne-Ph |
| SF    | TH5ATFG2                     |
| LKSET | 61.60 KHz                    |
| LKFIN | 79.0 Hz                      |
| LKLEV | 180                          |
| LGAIN | 22                           |
| LKPHS | 250                          |
| LKSIG | 610                          |
| CSPED | 11 Hz                        |
| FILDC |                              |
| FILDF |                              |

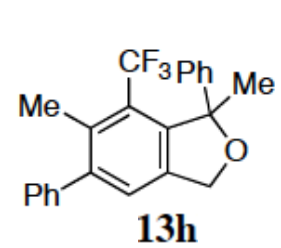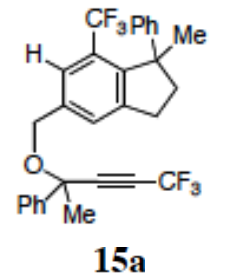

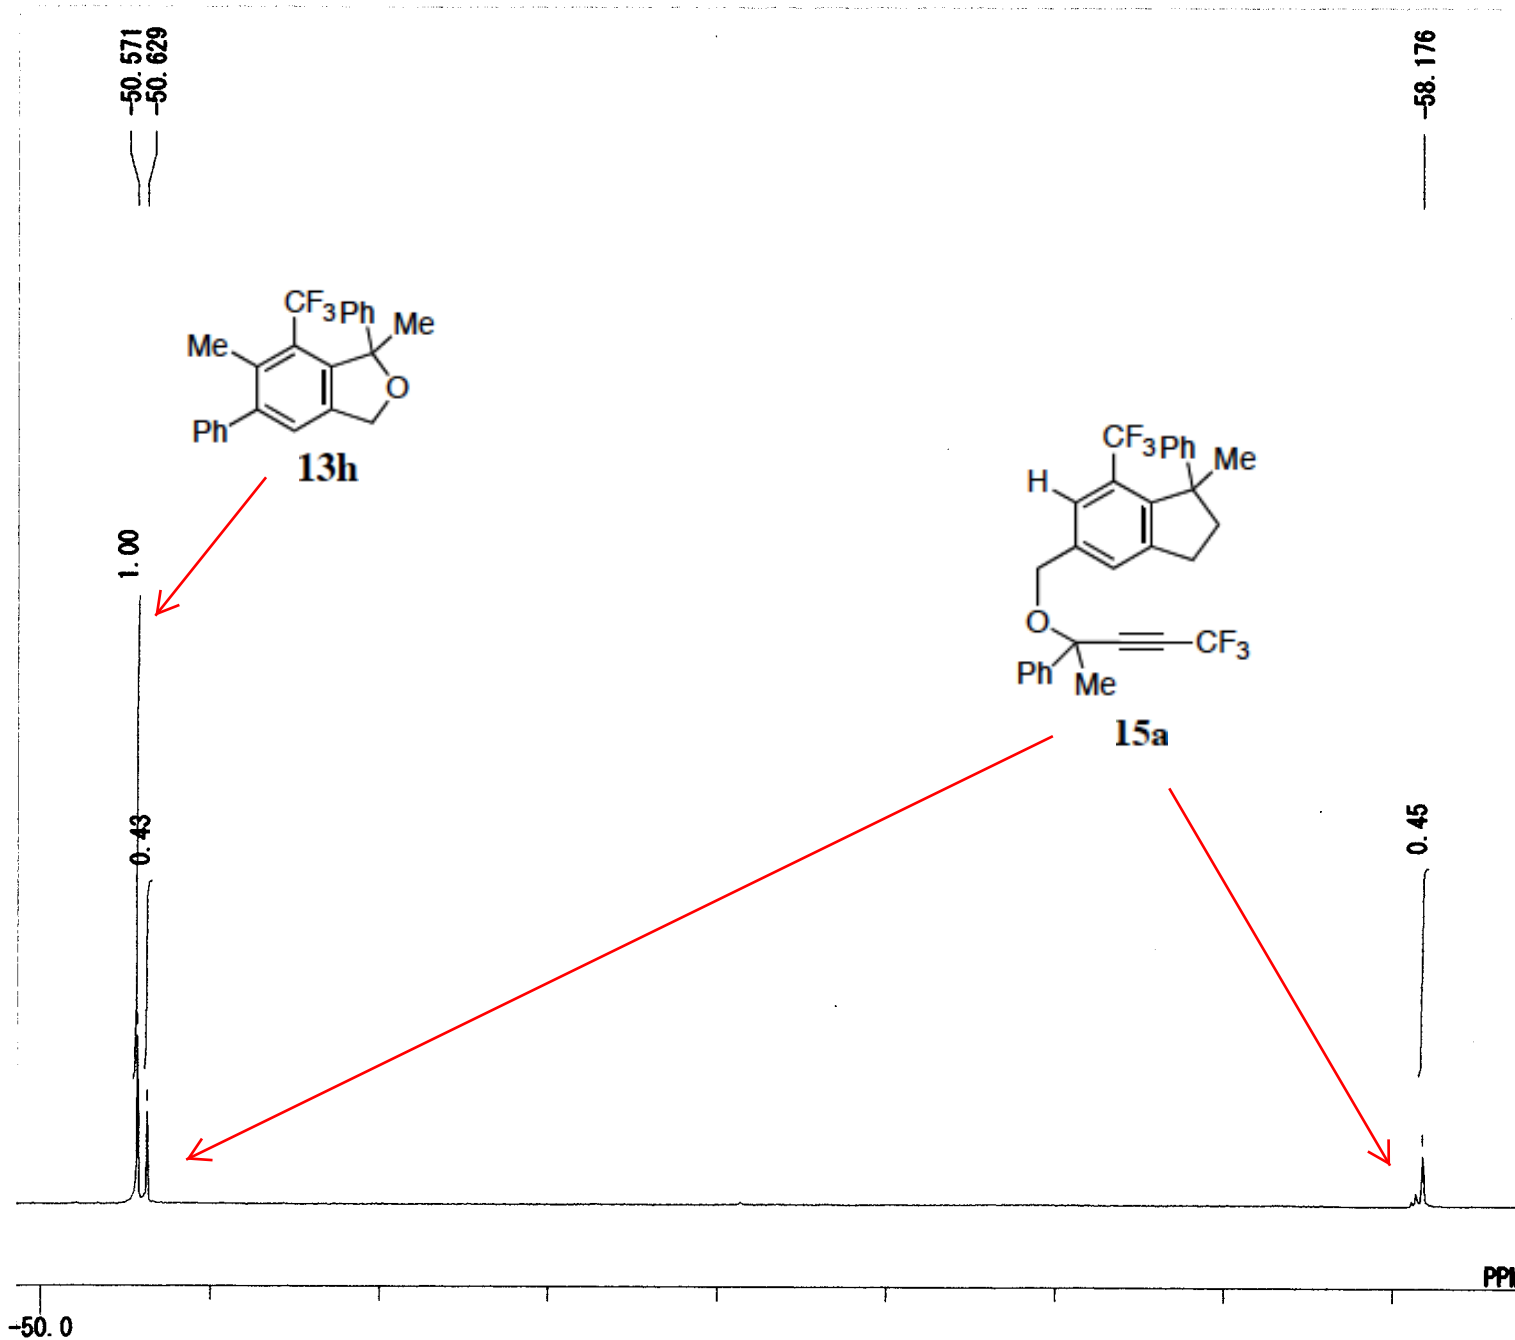

MENUF 19F  
 OBNUC 19F  
 OFR 376.05 MHz  
 OBSET 139.60 KHz  
 OBFIN 36.10 Hz  
 PW1 6.00 usec  
 DEADT 10.00 usec  
 PREDL 0.20000 msec  
 IWT 1.0000 msec  
 POINT 32768  
 SPO 32768  
 TIMES 16  
 DUMMY 1  
 FREQU 80000.00 Hz  
 FLT 40000 Hz  
 DELAY 5.00 usec  
 ACQTM 0.4096 sec  
 PD 4.9500 sec  
 ADBIT 16  
 RGAIN 14  
 BF 0.10 Hz  
 T1 0.00  
 T2 0.00  
 T3 90.00  
 T4 100.00  
 EXMOD NON  
 EXPCM NON:Single.coupled:PW1\_ACQTM.  
 IRNUC 1H  
 IFR 399.65 MHz  
 IRSET 124.00 KHz  
 IRFIN 10500.00 Hz  
 IRRPW 45 usec  
 IRATN 511  
 DFILE product-diyne-PhMe-alkyne-Phl  
 SF TH5ATFG2  
 LKSET 61.60 KHz  
 LKFIN 79.0 Hz  
 LKLEV 180  
 LGAIN 22  
 LKPHS 250  
 LKSIG 604  
 CSPED 11 Hz  
 FILDC  
 FILDF

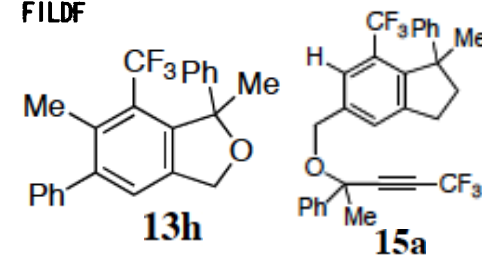

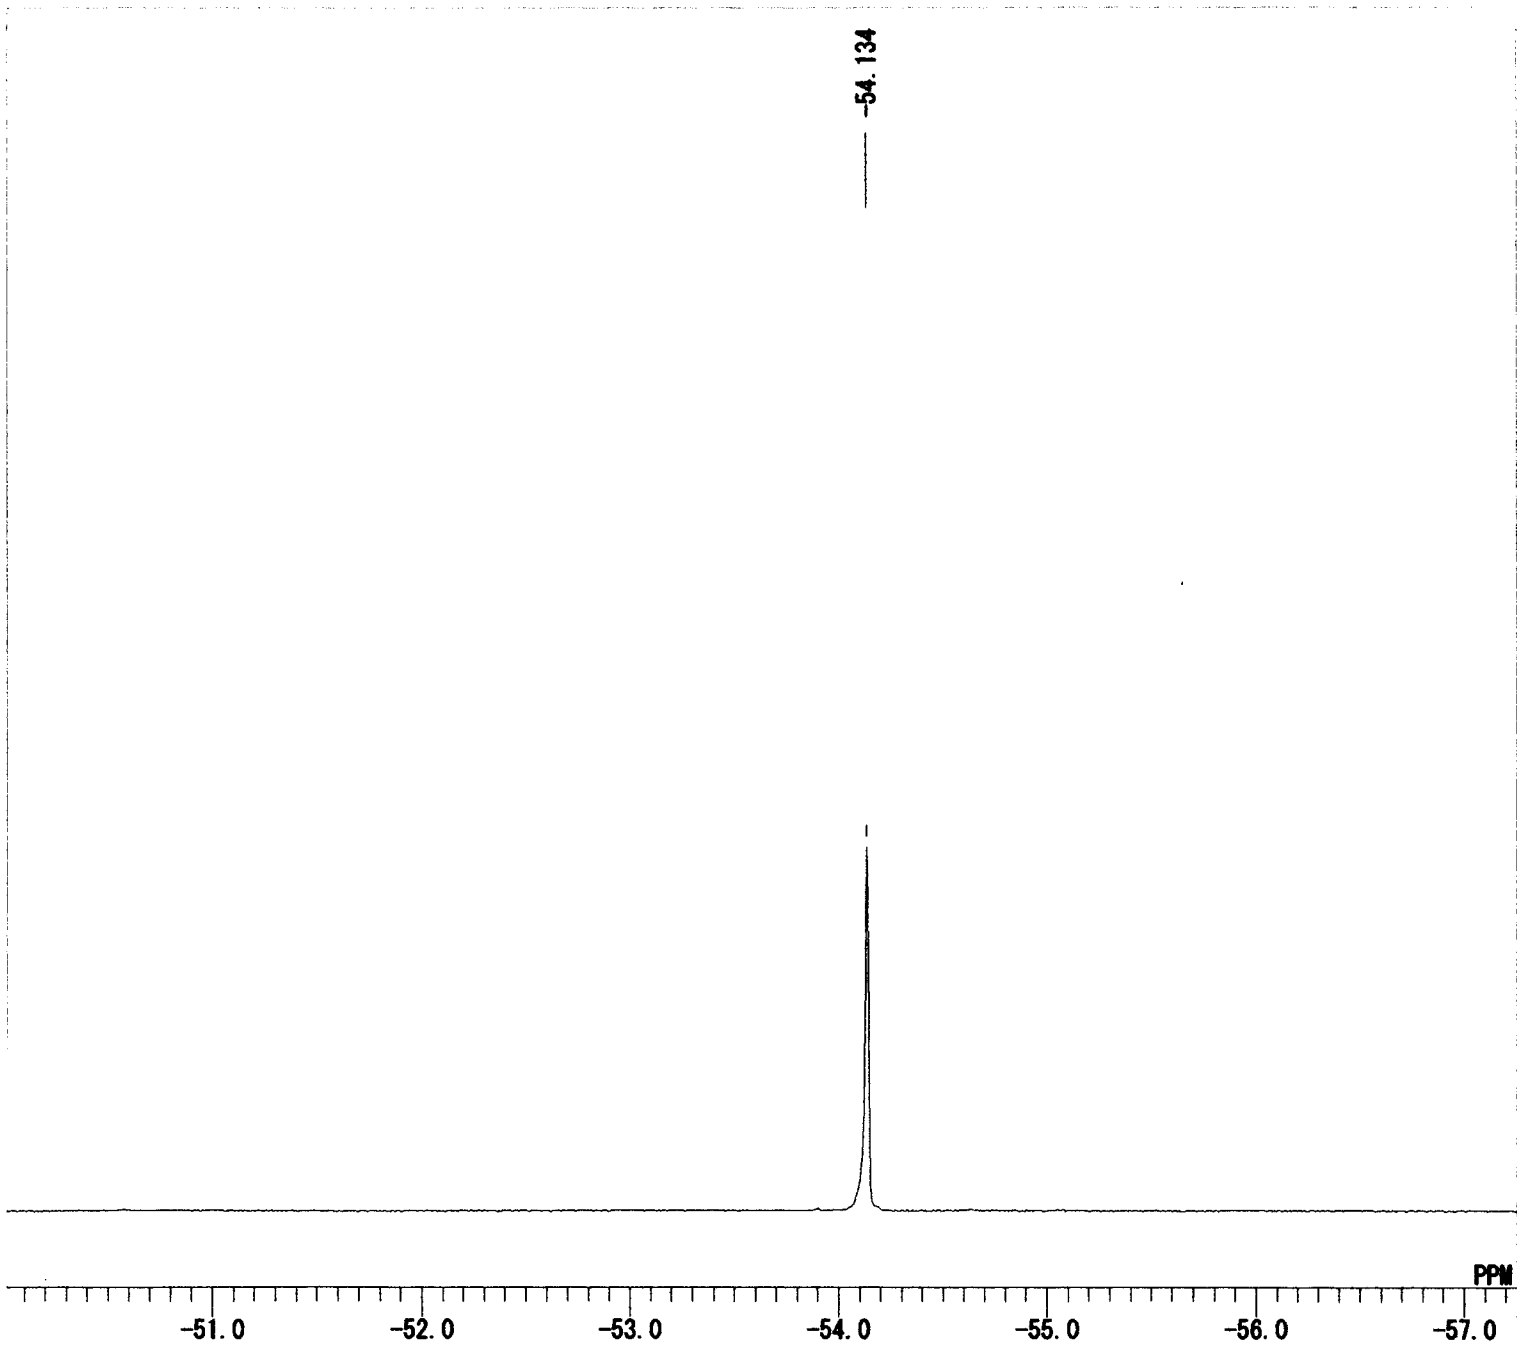

```

MENUM 19F
OBNUC 19F
OFR 376.05 MHz
OBSET 139.60 KHz
OBF IN 36.10 Hz
PW1 6.00 usec
DEADT 10.00 usec
PREDL 0.20000 msec
IWT 1.0000 msec
POINT 32768
SPO 32768
TIMES 16
DUMMY 1
FREQU 80000.00 Hz
FLT 40000 Hz
DELAY 5.00 usec
ACQTM 0.4096 sec
PD 4.9500 sec
ADBIT 16
RGAIN 14
BF 0.10 Hz
T1 0.00
T2 0.00
T3 90.00
T4 100.00
EXMOD NON
EXPCM NON:Single.coupled:PW1_ACQTM
IRNUC 1H
IFR 399.65 MHz
IRSET 124.00 KHz
IRF IN 10500.00 Hz
IRRPW 45 usec
IRATN 511
DFILE product-diyne-PhMe-alkyne-Ph
SF TH5ATFG2
LKSET 61.60 KHz
LKFIN 79.0 Hz
LKLEV 180
LGAIN 22
LKPHS 250
LKSIG 583
CSPED 13 Hz
FILDC
FILDF

```

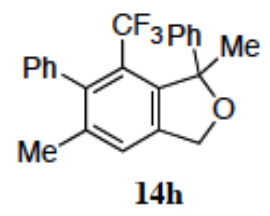



7.481  
7.465  
7.445  
7.422  
7.411  
7.405  
7.398  
7.387  
7.371  
7.353  
7.333  
7.317  
7.312  
7.309  
7.292  
7.283  
7.277  
7.272  
7.260

5.299  
5.116  
5.086  
5.076  
5.045

2.537  
2.328  
2.323  
2.072

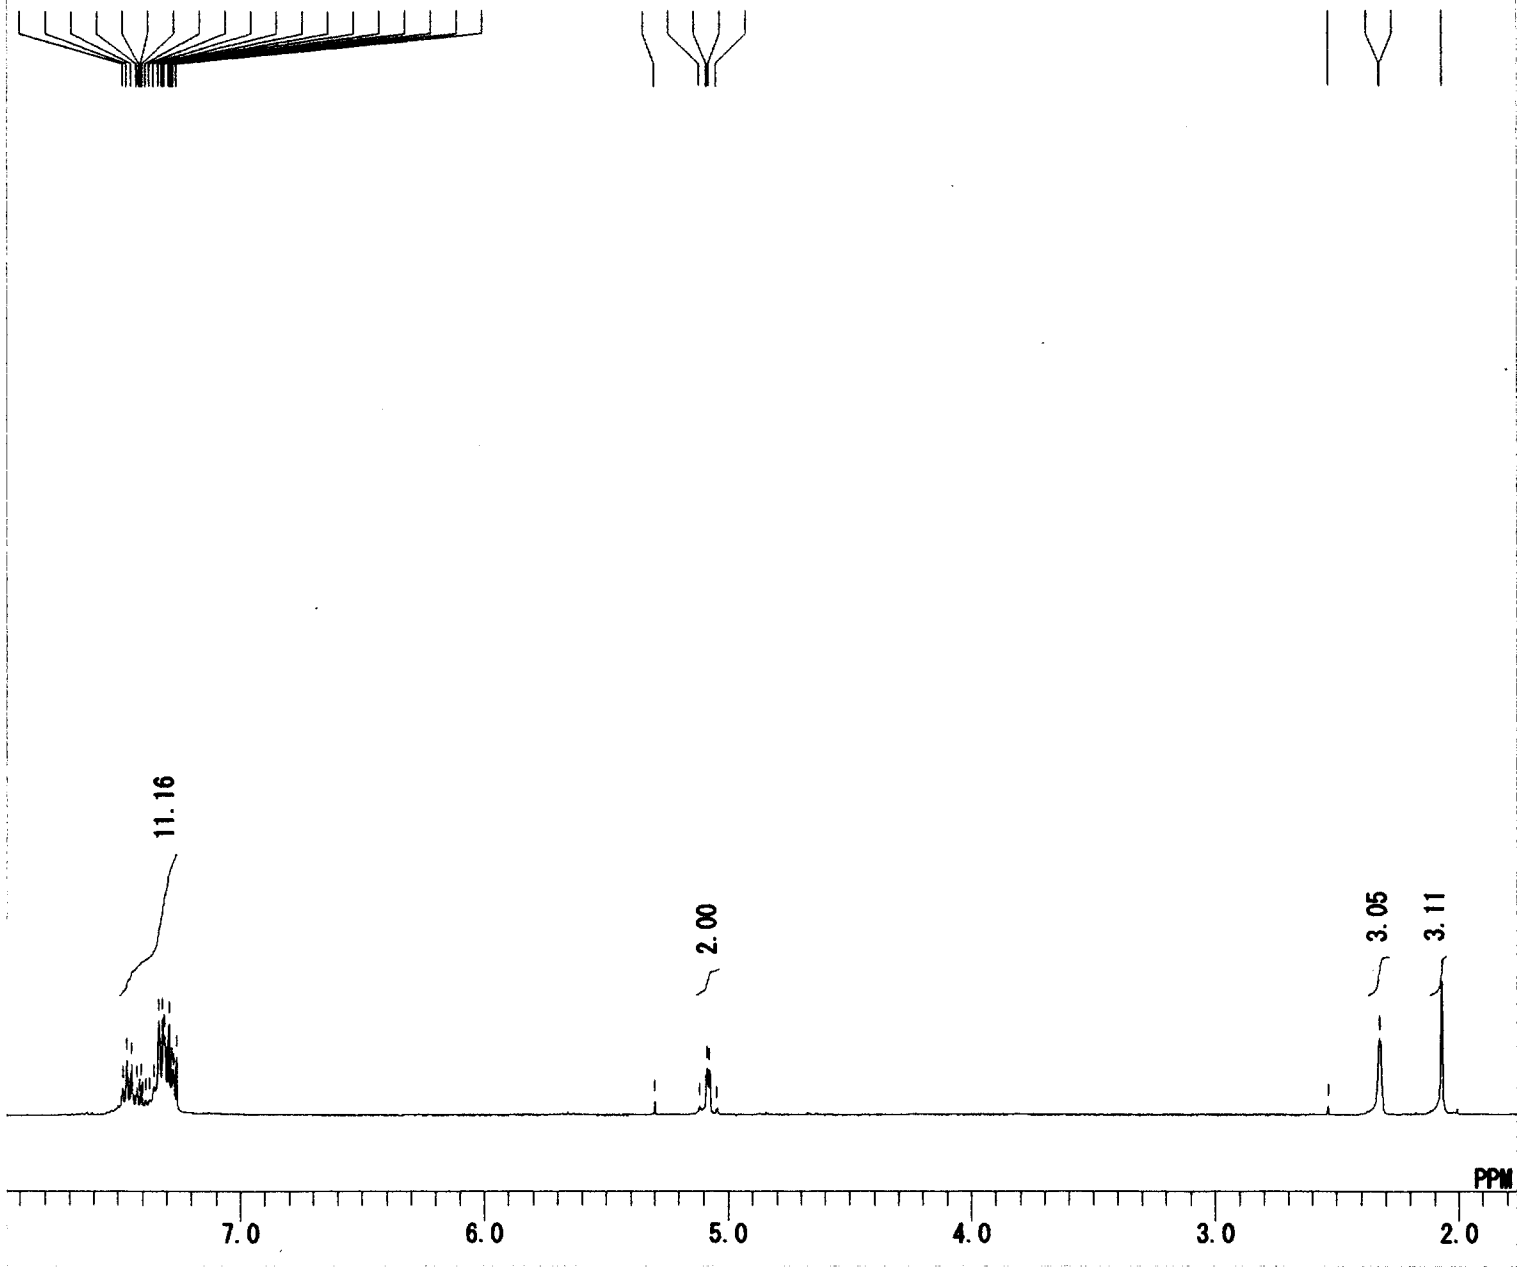

```

MENUF 1H
OBNUC 1H
OFR 399.65 MHz
OBSET 135.40 KHz
OBF IN 24.90 Hz
PW1 5.80 usec
DEADT 72.10 usec
PREDL 0.20000 msec
IWT 1.0000 msec
POINT 16384
SPO 16384
TIMES 8
DUMMY 1
FREQU 7992.01 Hz
FLT 4000 Hz
DELAY 50.00 usec
ACQTM 2.0501 sec
PD 4.9500 sec
ADBIT 16
RGAIN 16
BF 0.10 Hz
T1 0.00
T2 0.00
T3 90.00
T4 100.00
EXMOD NON
EXPCM NON:Single.coupled:PW1_ACQTM
IRNUC 1H
IFR 399.65 MHz
IRSET 136.90 KHz
IRFIN 97.50 Hz
IRRPW 45 usec
IRATN 511
DFILE product-diyne-PhMe-alkyne-Ph
SF TH5ATFG2
LKSET 61.60 KHz
LKFIN 79.0 Hz
LKLEV 180
LGAIN 22
LKPHS 250
LKSIG 585
CSPED 13 Hz
FILDC
FILDF
  
```

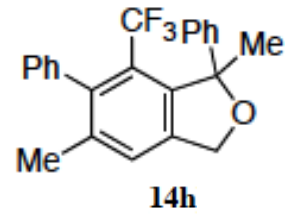

product-diyne-PhMe-MeCN(1H)

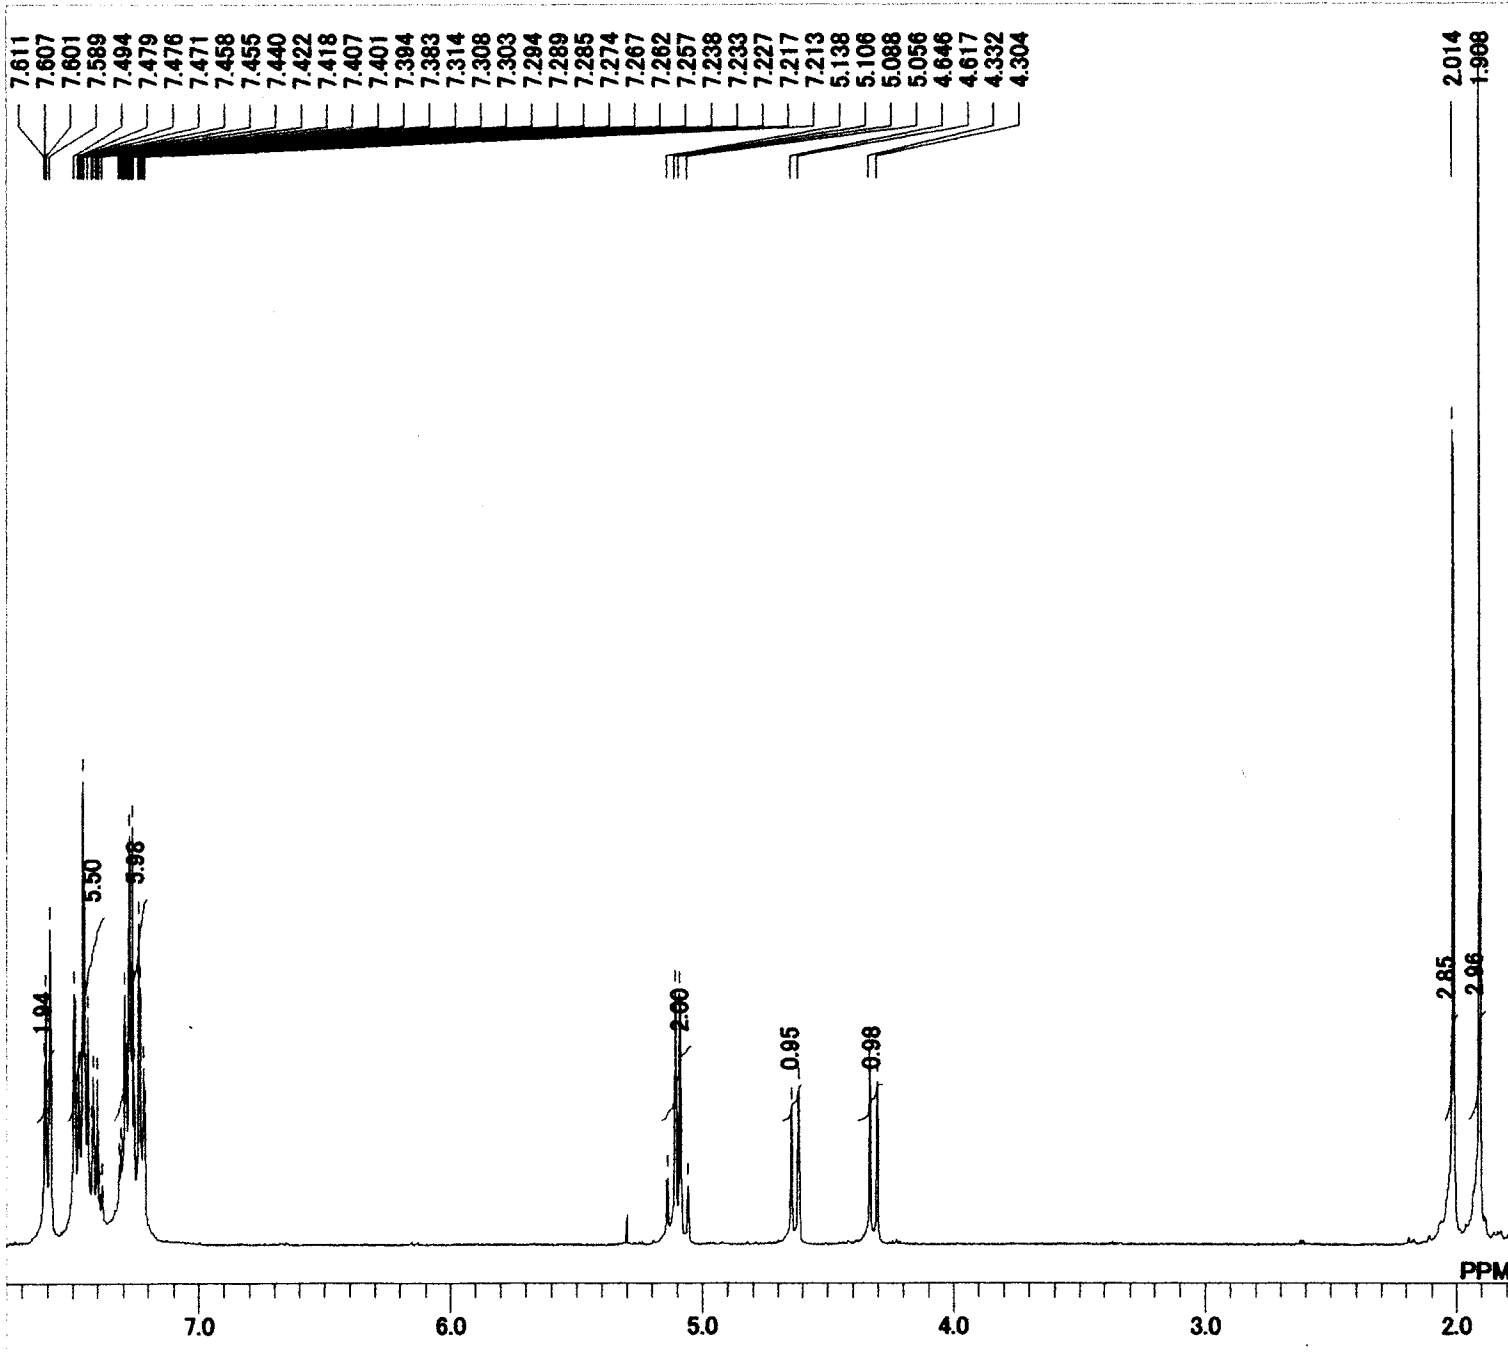

MENUF 1H  
 OBNUC 1H  
 OFR 399.65 MHz  
 OBSSET 135.40 KHz  
 OBFIN 24.90 Hz  
 PW1 5.80 usec  
 DEADT 72.10 usec  
 PREDL 0.20000 msec  
 IWT 1.0000 msec  
 POINT 16384  
 SPO 16384  
 TIMES 8  
 DUMMY 1  
 FREQU 7992.01 Hz  
 FLT 4000 Hz  
 DELAY 50.00 usec  
 ACQTM 2.0501 sec  
 PD 4.9500 sec  
 ADBIT 16  
 RGAIN 16  
 BF 0.10 Hz  
 T1 0.00  
 T2 0.00  
 T3 90.00  
 T4 100.00  
 EXMOD NON  
 EXPCM NON:Single.coupled:PW1\_ACQTM\_PE  
 IRNUC 1H  
 IFR 399.65 MHz  
 IRSET 136.90 KHz  
 IRFIN 97.50 Hz  
 IRRPW 45 usec  
 IRATN 511  
 DFILE \_DEFAULT.ALS  
 SF TH5ATFG2  
 LKSET 61.60 KHz  
 LKFIN 79.0 Hz  
 LKLEV 180  
 LGAIN 22  
 LKPHS 250  
 LKSIG 648  
 CSPED 11 Hz  
 FILDC  
 FILDF

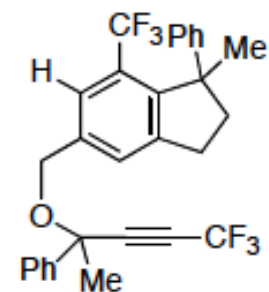

15a

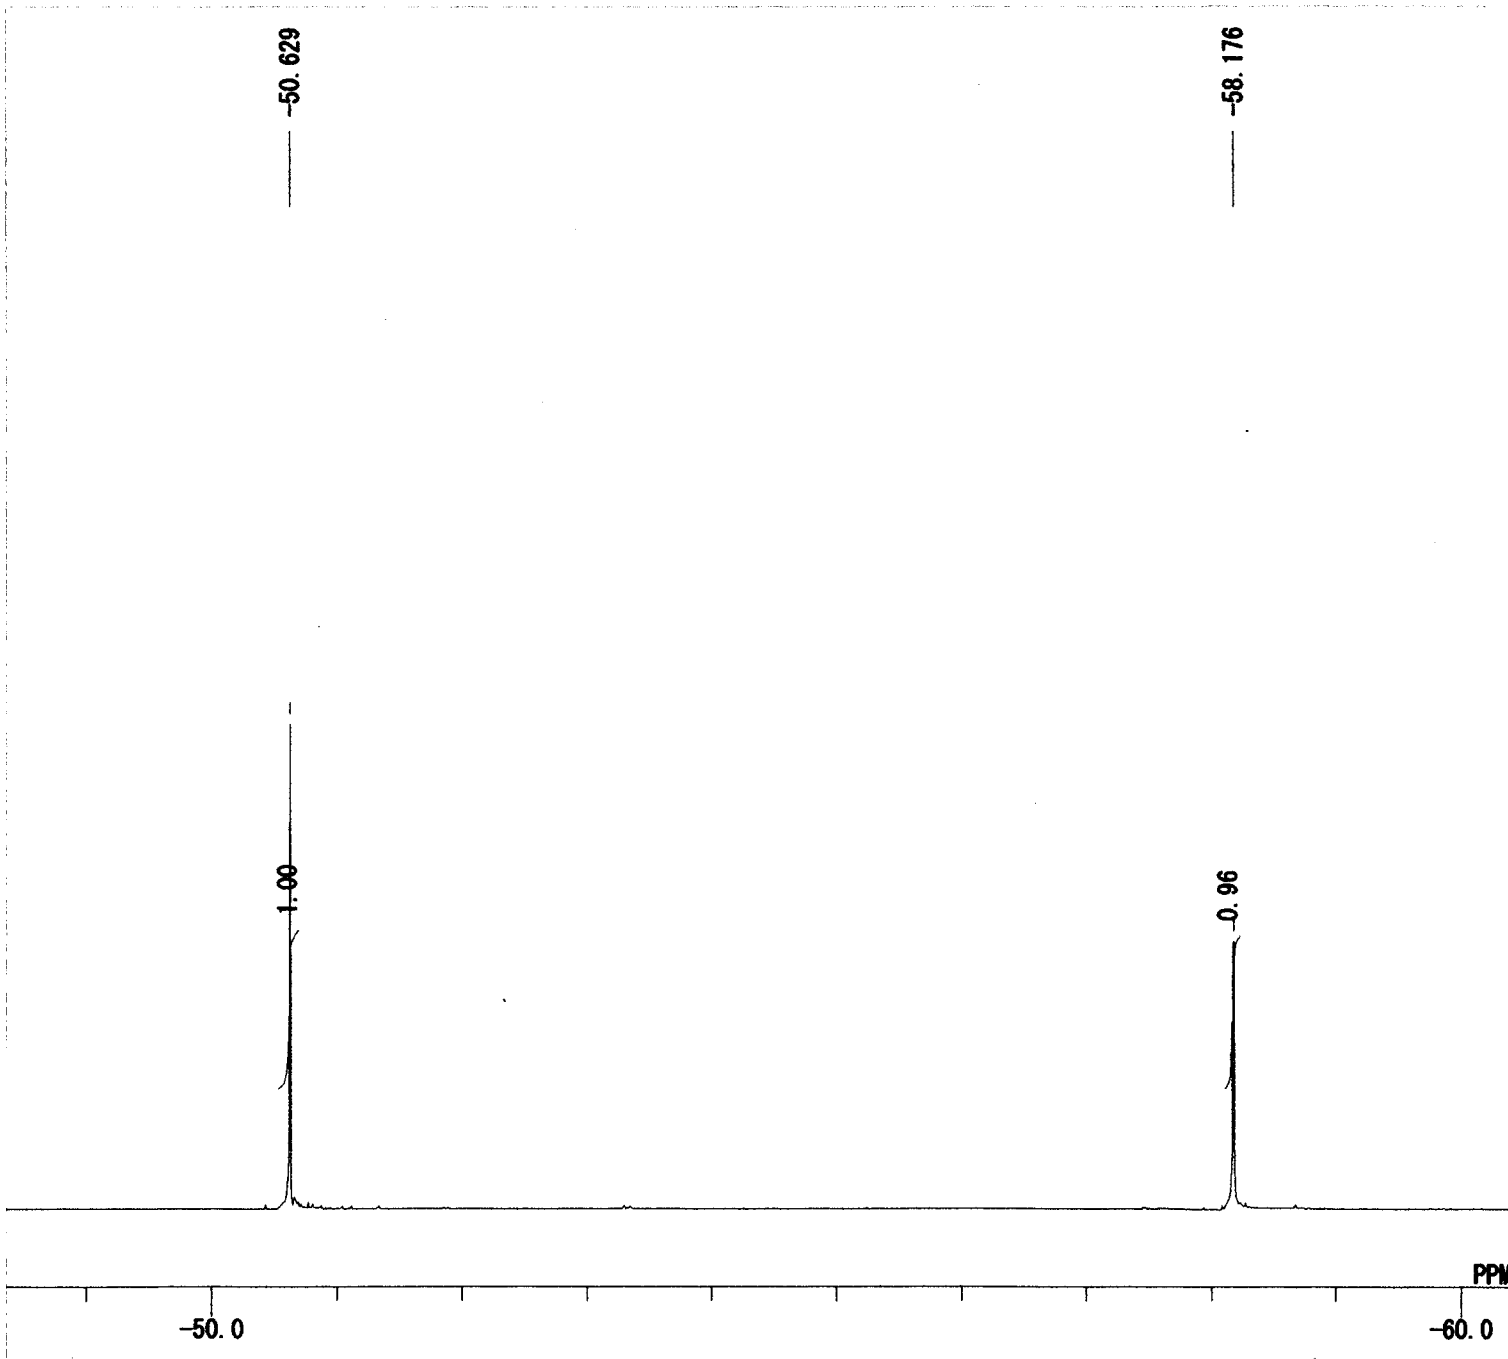

```

MENUF 19F
OBNUC 19F
OFR 376.05 MHz
OBSET 139.60 KHz
OBFIN 36.10 Hz
PW1 6.00 usec
DEADT 10.00 usec
PREDL 0.20000 msec
IWT 1.0000 msec
POINT 32768
SPO 32768
TIMES 16
DUMMY 1
FREQU 80000.00 Hz
FLT 40000 Hz
DELAY 5.00 usec
ACQTM 0.4096 sec
PD 4.9500 sec
ADBIT 16
RGAIN 14
BF 0.10 Hz
T1 0.00
T2 0.00
T3 90.00
T4 100.00
EXMOD NON
EXPCM NON:Single. coupled:PW1_ACQTM
IRNUC 1H
IFR 399.65 MHz
IRSET 124.00 KHz
IRFIN 10500.00 Hz
IRRPW 45 usec
IRATN 511
DFILE product-diyne-PhMe-MeCN(19F).
SF TH5ATFG2
LKSET 61.60 KHz
LKFIN 79.0 Hz
LKLEV 180
LGAIN 22
LKPHS 250
LKSIG 646
CSPED 11 Hz
FILDC
FILDF

```

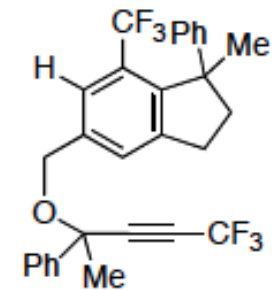

15a

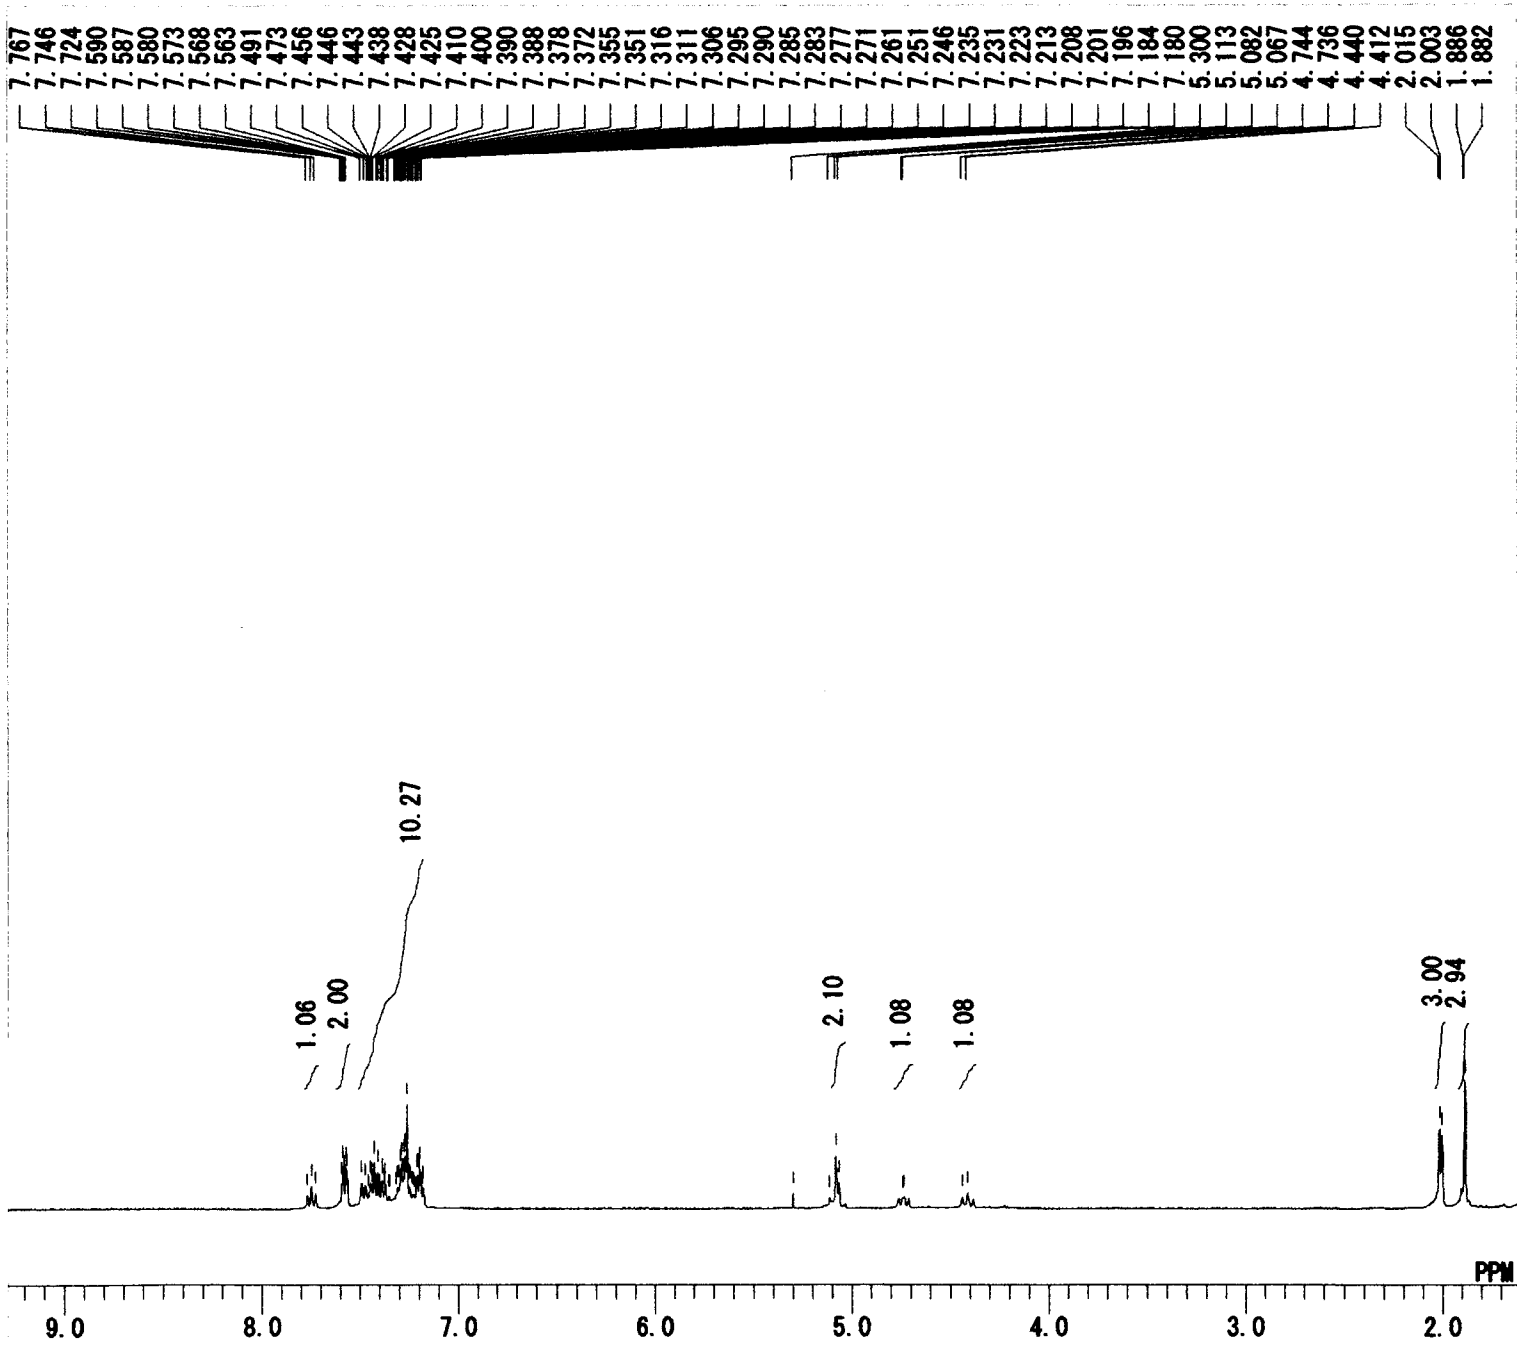

|       |                                |
|-------|--------------------------------|
| MENUF | 1H                             |
| OBNUC | 1H                             |
| OFR   | 399.65 MHz                     |
| OBSET | 135.40 KHz                     |
| OBFIN | 24.90 Hz                       |
| PW1   | 5.80 usec                      |
| DEADT | 72.10 usec                     |
| PREDL | 0.20000 msec                   |
| IWT   | 1.0000 msec                    |
| POINT | 16384                          |
| SPO   | 16384                          |
| TIMES | 8                              |
| DUMMY | 1                              |
| FREQU | 7992.01 Hz                     |
| FLT   | 4000 Hz                        |
| DELAY | 50.00 usec                     |
| ACQTM | 2.0501 sec                     |
| PD    | 4.9500 sec                     |
| ADBIT | 16                             |
| RGAIN | 17                             |
| BF    | 0.10 Hz                        |
| T1    | 0.00                           |
| T2    | 0.00                           |
| T3    | 90.00                          |
| T4    | 100.00                         |
| EXMOD | NON                            |
| EXPCM | NON:Single.coupled:PW1_ACQTM   |
| IRNUC | 1H                             |
| IFR   | 399.65 MHz                     |
| IRSET | 136.90 KHz                     |
| IRFIN | 97.50 Hz                       |
| IRRPW | 45 usec                        |
| IRATN | 511                            |
| DFILE | byproduct-diyne-PhMe-MeCN (1H) |
| SF    | TH5ATFG2                       |
| LKSET | 61.60 KHz                      |
| LKFIN | 79.0 Hz                        |
| LKLEV | 180                            |
| LGAIN | 23                             |
| LKPHS | 250                            |
| LKSIG | 838                            |
| CSPED | 11 Hz                          |
| FILDC |                                |
| FILDF |                                |

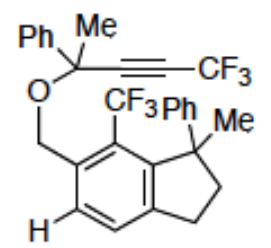

15b

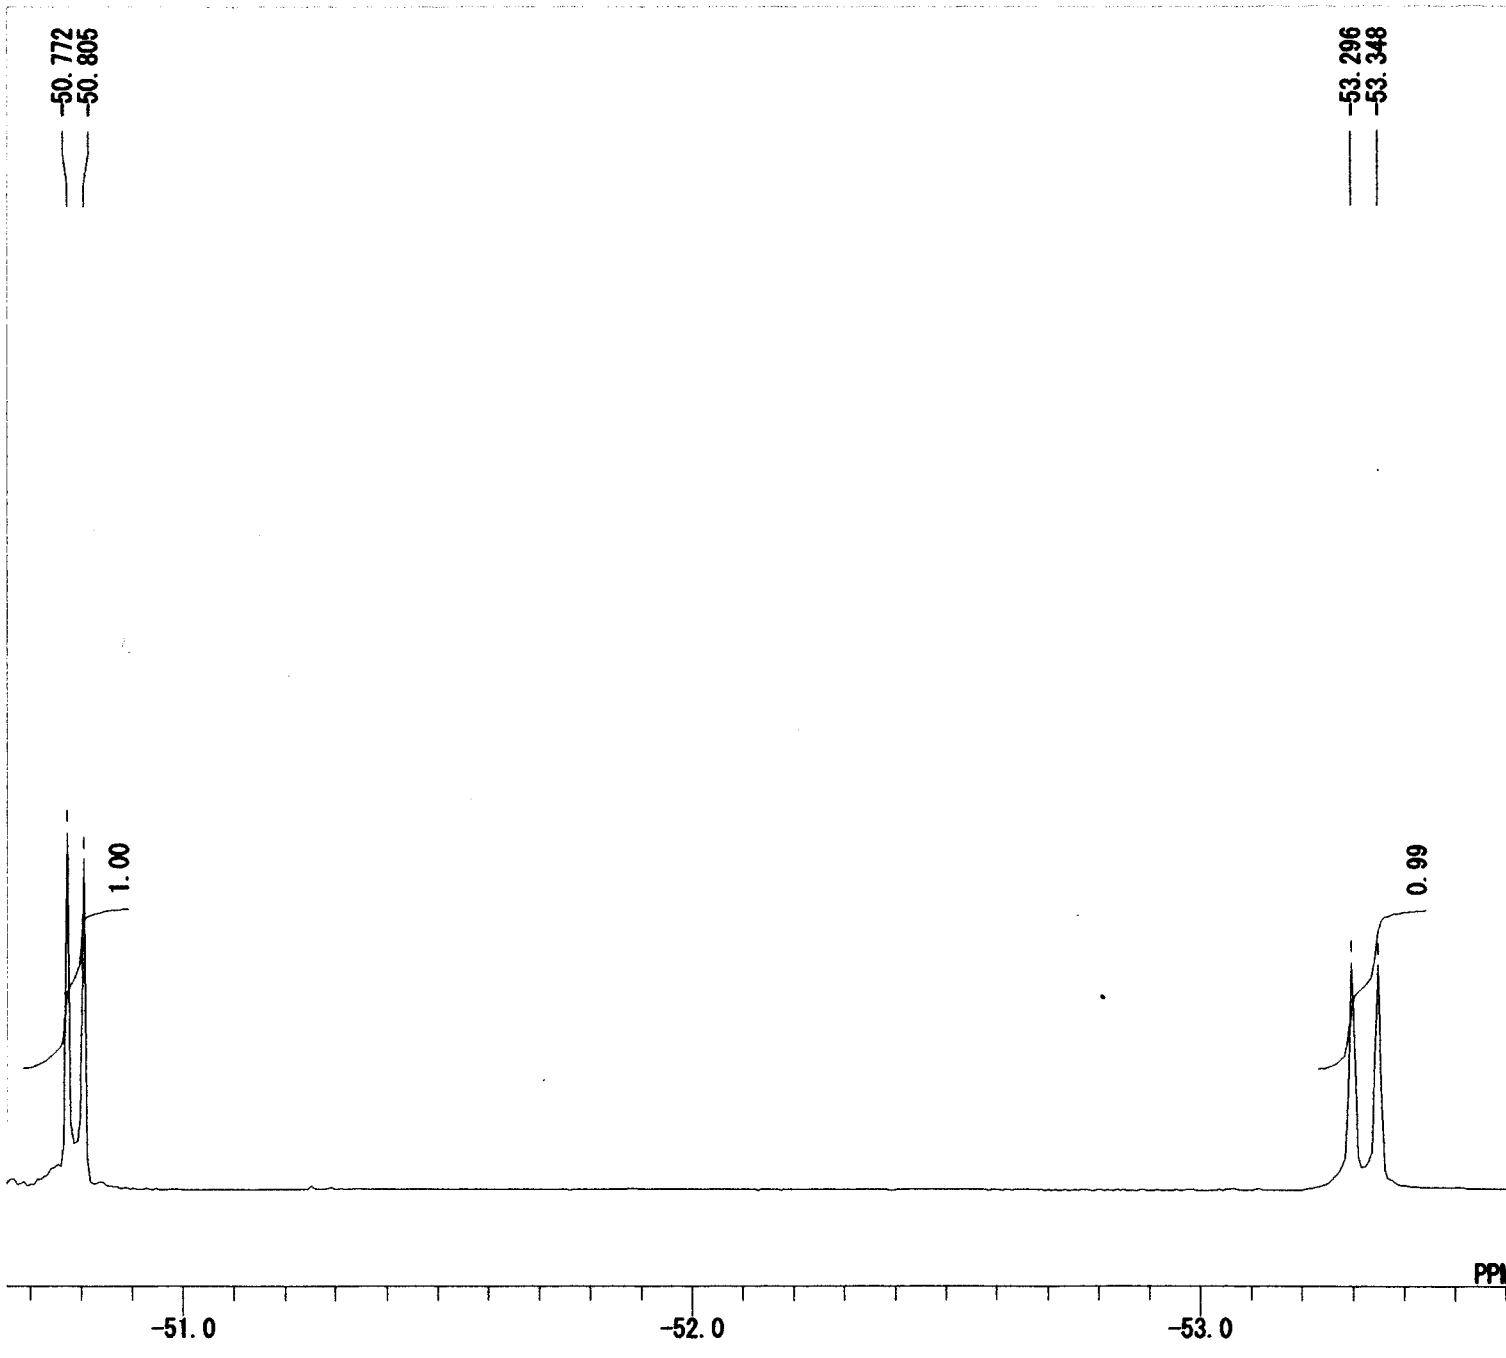

|       |                                 |
|-------|---------------------------------|
| MENUF | 19F                             |
| OBNUC | 19F                             |
| OFR   | 376.05 MHz                      |
| OBSET | 139.60 KHz                      |
| OBFIN | 36.10 Hz                        |
| PW1   | 6.00 usec                       |
| DEADT | 10.00 usec                      |
| PREDL | 0.20000 msec                    |
| IWT   | 1.0000 msec                     |
| POINT | 32768                           |
| SPO   | 32768                           |
| TIMES | 16                              |
| DUMMY | 1                               |
| FREQU | 80000.00 Hz                     |
| FLT   | 40000 Hz                        |
| DELAY | 5.00 usec                       |
| ACQTM | 0.4096 sec                      |
| PD    | 4.9500 sec                      |
| ADBIT | 16                              |
| RGAIN | 14                              |
| BF    | 0.10 Hz                         |
| T1    | 0.00                            |
| T2    | 0.00                            |
| T3    | 90.00                           |
| T4    | 100.00                          |
| EXMOD | NON                             |
| EXPCM | NON: Single. coupled: PW1_ACQTM |
| IRNUC | 1H                              |
| IFR   | 399.65 MHz                      |
| IRSET | 124.00 KHz                      |
| IRFIN | 10500.00 Hz                     |
| IRRPW | 45 usec                         |
| IRATN | 511                             |
| DFILE | byproduct-diyne-PhMe-MeCN (19f  |
| SF    | TH5ATFG2                        |
| LKSET | 61.60 KHz                       |
| LKFIN | 79.0 Hz                         |
| LKLEV | 180                             |
| LGA1N | 23                              |
| LKPHS | 250                             |
| LKSIG | 834                             |
| CSPED | 11 Hz                           |
| FILDG |                                 |
| FILDF |                                 |

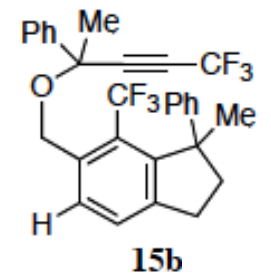

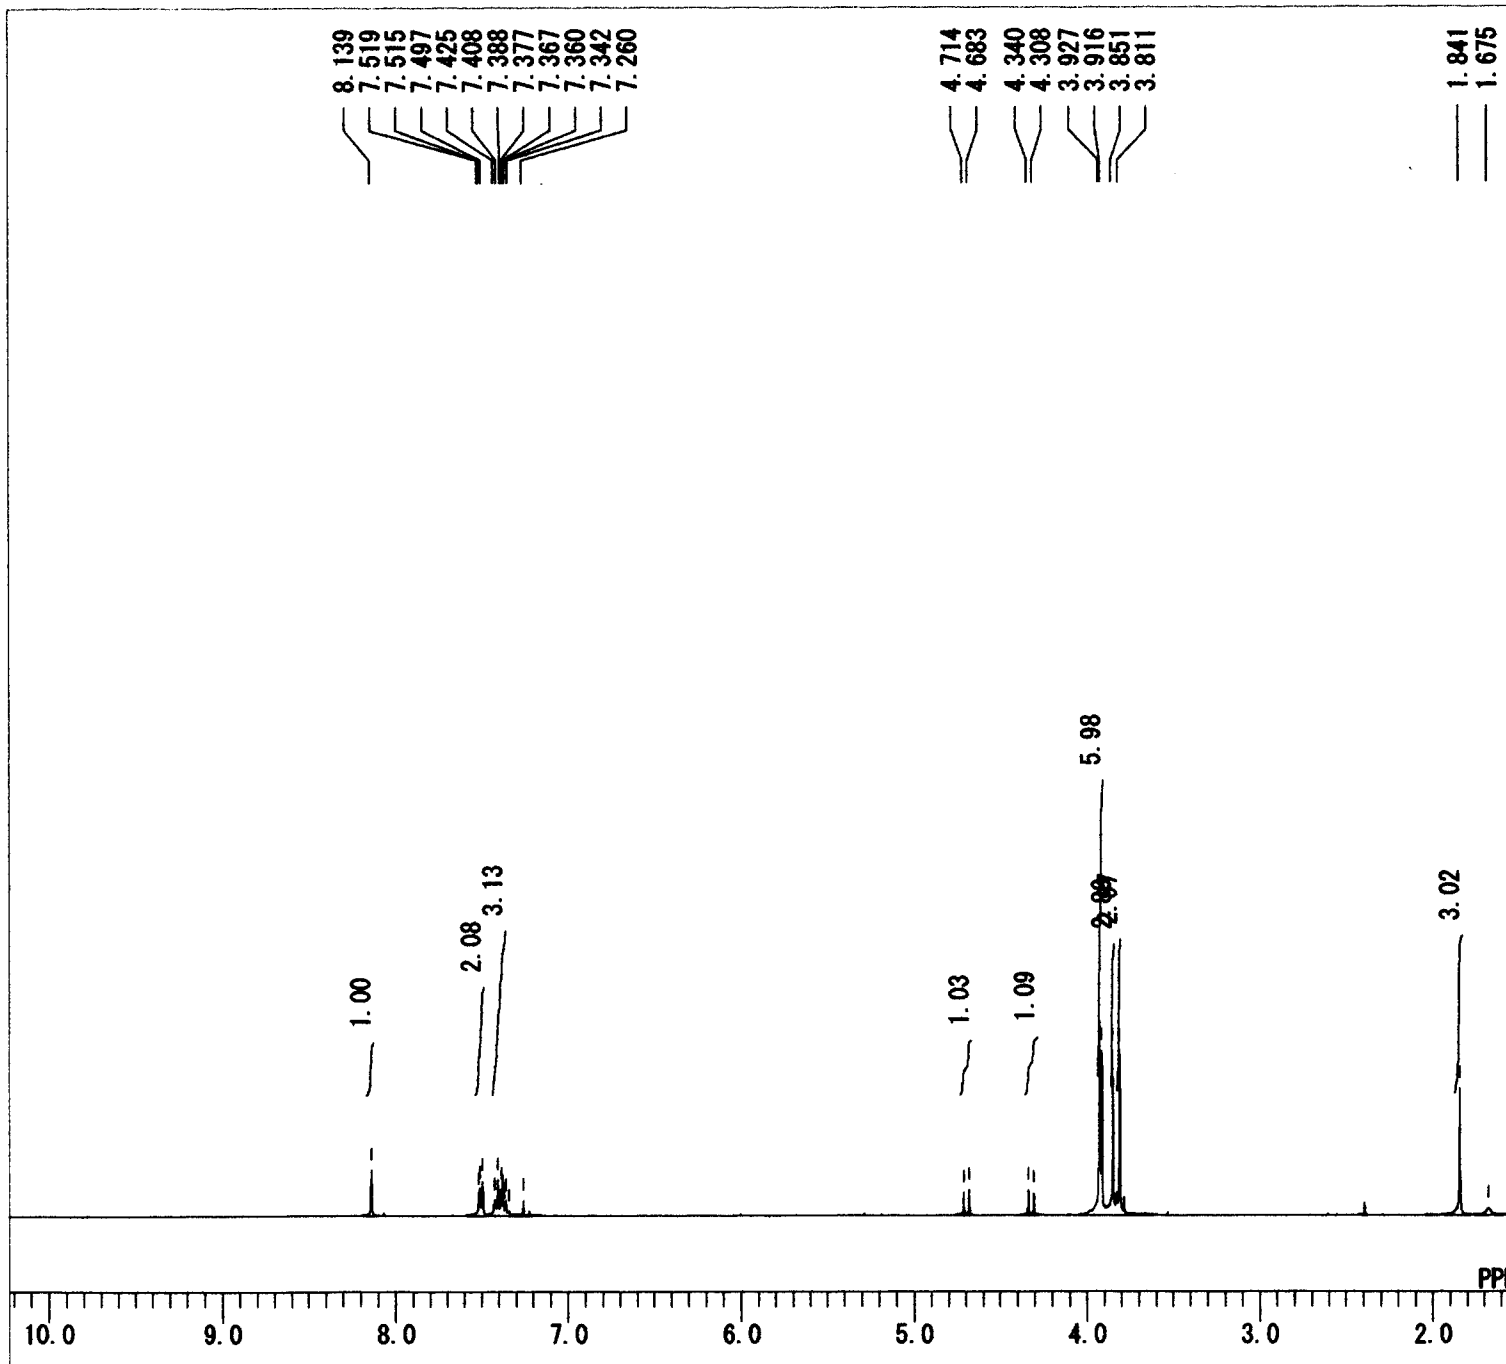

MENUF 1H  
 OBNUC 1H  
 OFR 399.65 MHz  
 OBSET 135.40 KHz  
 OBFIN 24.90 Hz  
 PW1 5.80 usec  
 DEADT 72.10 usec  
 PREDL 0.20000 msec  
 IWT 1.0000 msec  
 POINT 16384  
 SPO 16384  
 TIMES 8  
 DUMMY 1  
 FREQU 7992.01 Hz  
 FLT 4000 Hz  
 DELAY 50.00 usec  
 ACQTM 2.0501 sec  
 PD 4.9500 sec  
 ADBIT 16  
 RGA IN 13  
 BF 0.10 Hz  
 T1 0.00  
 T2 0.00  
 T3 90.00  
 T4 100.00  
 EXMOD NON  
 EXPCM NON:Single.coupled:PW1\_ACQTM.  
 IRNUC 1H  
 IFR 399.65 MHz  
 IRSET 136.90 KHz  
 IRFIN 97.50 Hz  
 IRRPW 45 usec  
 IRATN 511  
 DFILE CF3-Diyne (PhMe)-H+2Di (CO2Me) /  
 SF TH5ATFG2  
 LKSET 61.60 KHz  
 LKFIN 79.0 Hz  
 LKLEV 180  
 LGAIN 24  
 LKPHS 250  
 LKSIG 935  
 CSPED 14 Hz  
 FILDC  
 FILDF

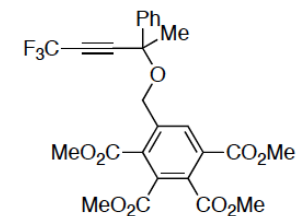

16

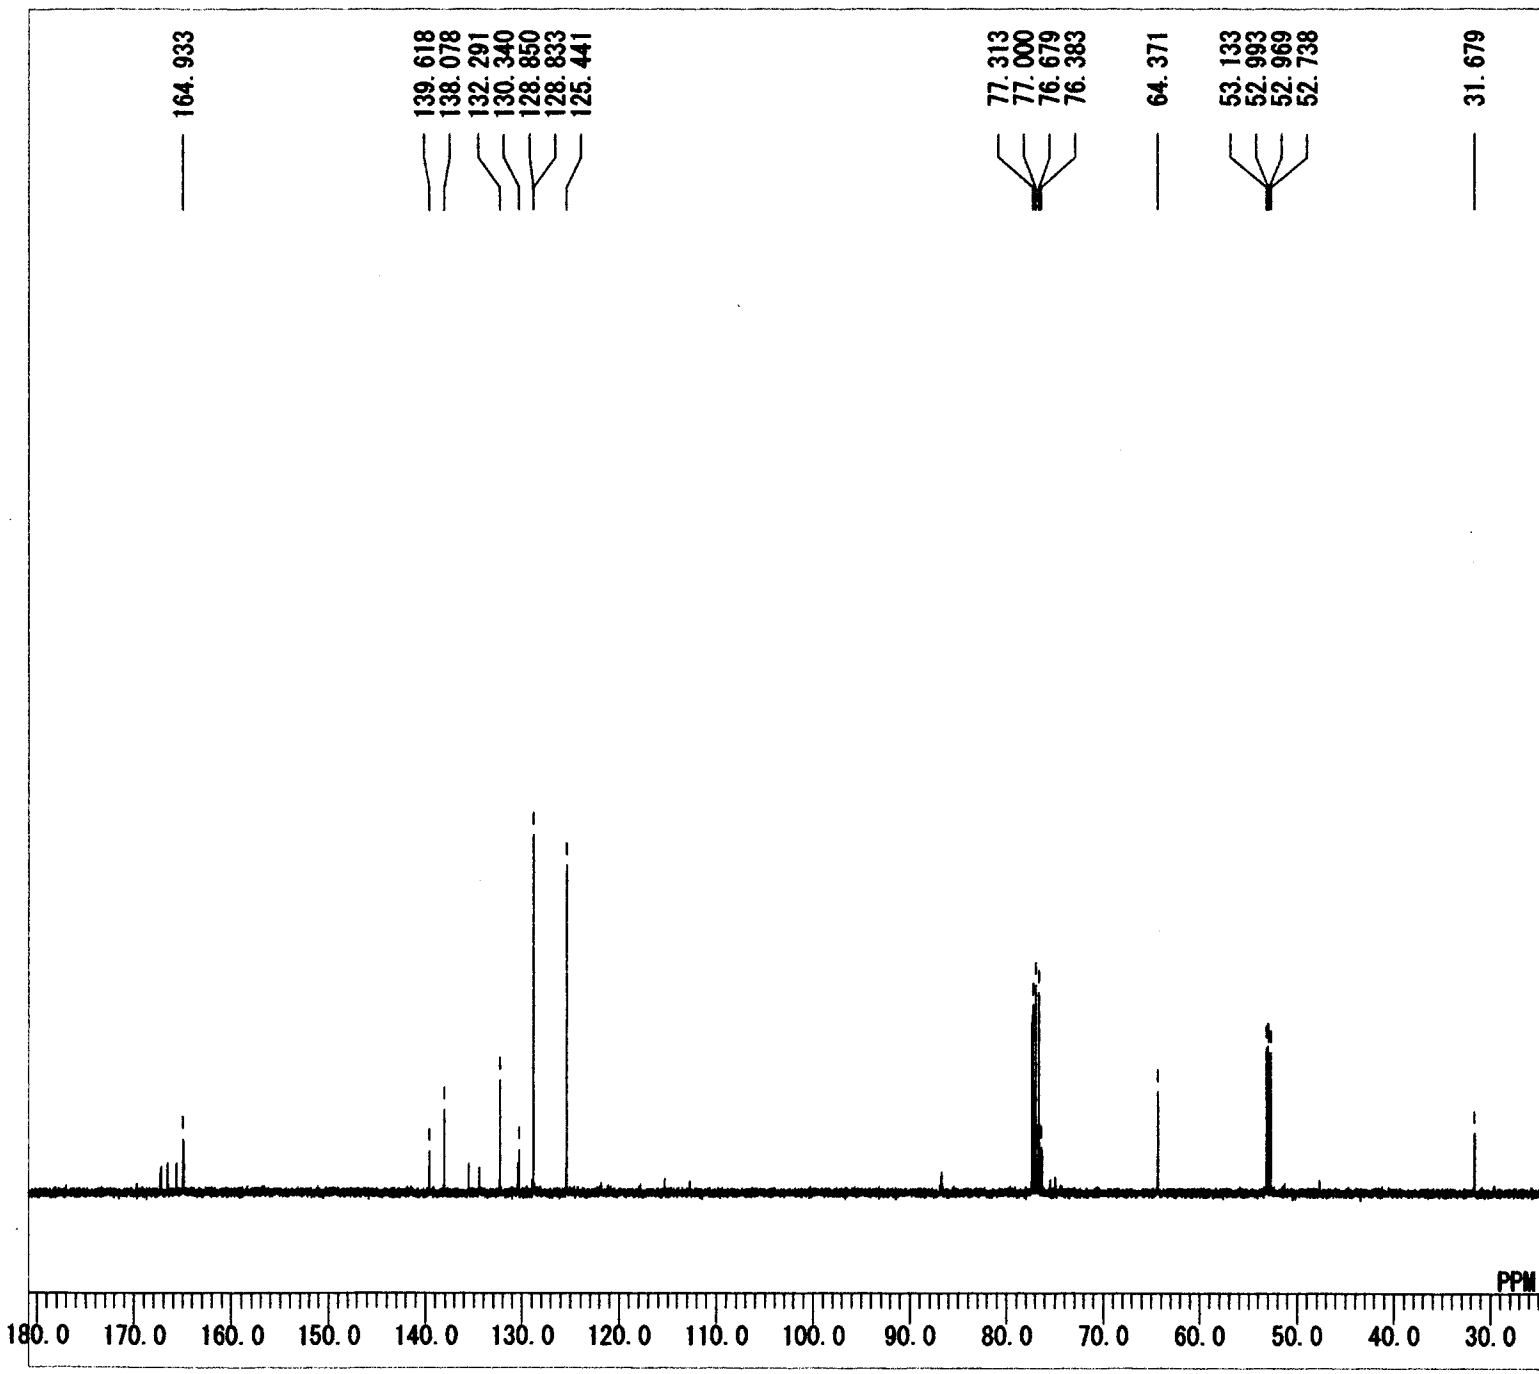

|       |                                   |
|-------|-----------------------------------|
| MENUF | 13C                               |
| OBNUC | 13C                               |
| OFR   | 100.40 MHz                        |
| OBSET | 125.00 KHz                        |
| OBFIN | 10500.00 Hz                       |
| PW1   | 6.00 usec                         |
| DEADT | 19.10 usec                        |
| PREDL | 0.20000 msec                      |
| IWT   | 1.0000 msec                       |
| POINT | 32768                             |
| SPO   | 32768                             |
| TIMES | 512                               |
| DUMMY | 1                                 |
| FREQU | 27118.64 Hz                       |
| FLT   | 13550 Hz                          |
| DELAY | 14.80 usec                        |
| ACQTM | 1.2083 sec                        |
| PD    | 1.7920 sec                        |
| ADBIT | 16                                |
| RGAIN | 25                                |
| BF    | 0.10 Hz                           |
| T1    | 0.00                              |
| T2    | 0.00                              |
| T3    | 90.00                             |
| T4    | 100.00                            |
| EXMOD | BCM                               |
| EXPCM | Bi level. complete. decoupling: 3 |
| IRNUC | 1H                                |
| IFR   | 399.65 MHz                        |
| IRSET | 124.00 KHz                        |
| IRFIN | 10500.00 Hz                       |
| IRRPW | 45 usec                           |
| IRATN | 511                               |
| DFILE | CF3-Diyne(PhMe)-H+2Di(CO2Me)/     |
| SF    | TH5ATFG2                          |
| LKSET | 61.60 KHz                         |
| LKFIN | 79.0 Hz                           |
| LKLEV | 180                               |
| LGAIN | 24                                |
| LKPHS | 250                               |
| LKSIG | 958                               |
| CSPED | 14 Hz                             |
| FILDC |                                   |
| FILDF |                                   |

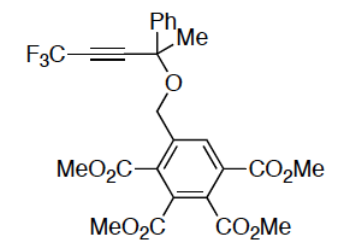

C:\WINNMR\DATA\Fluorine\Moriyasu\product-diyne-PhMe-di(CO2Me)-high-polor(19F).als

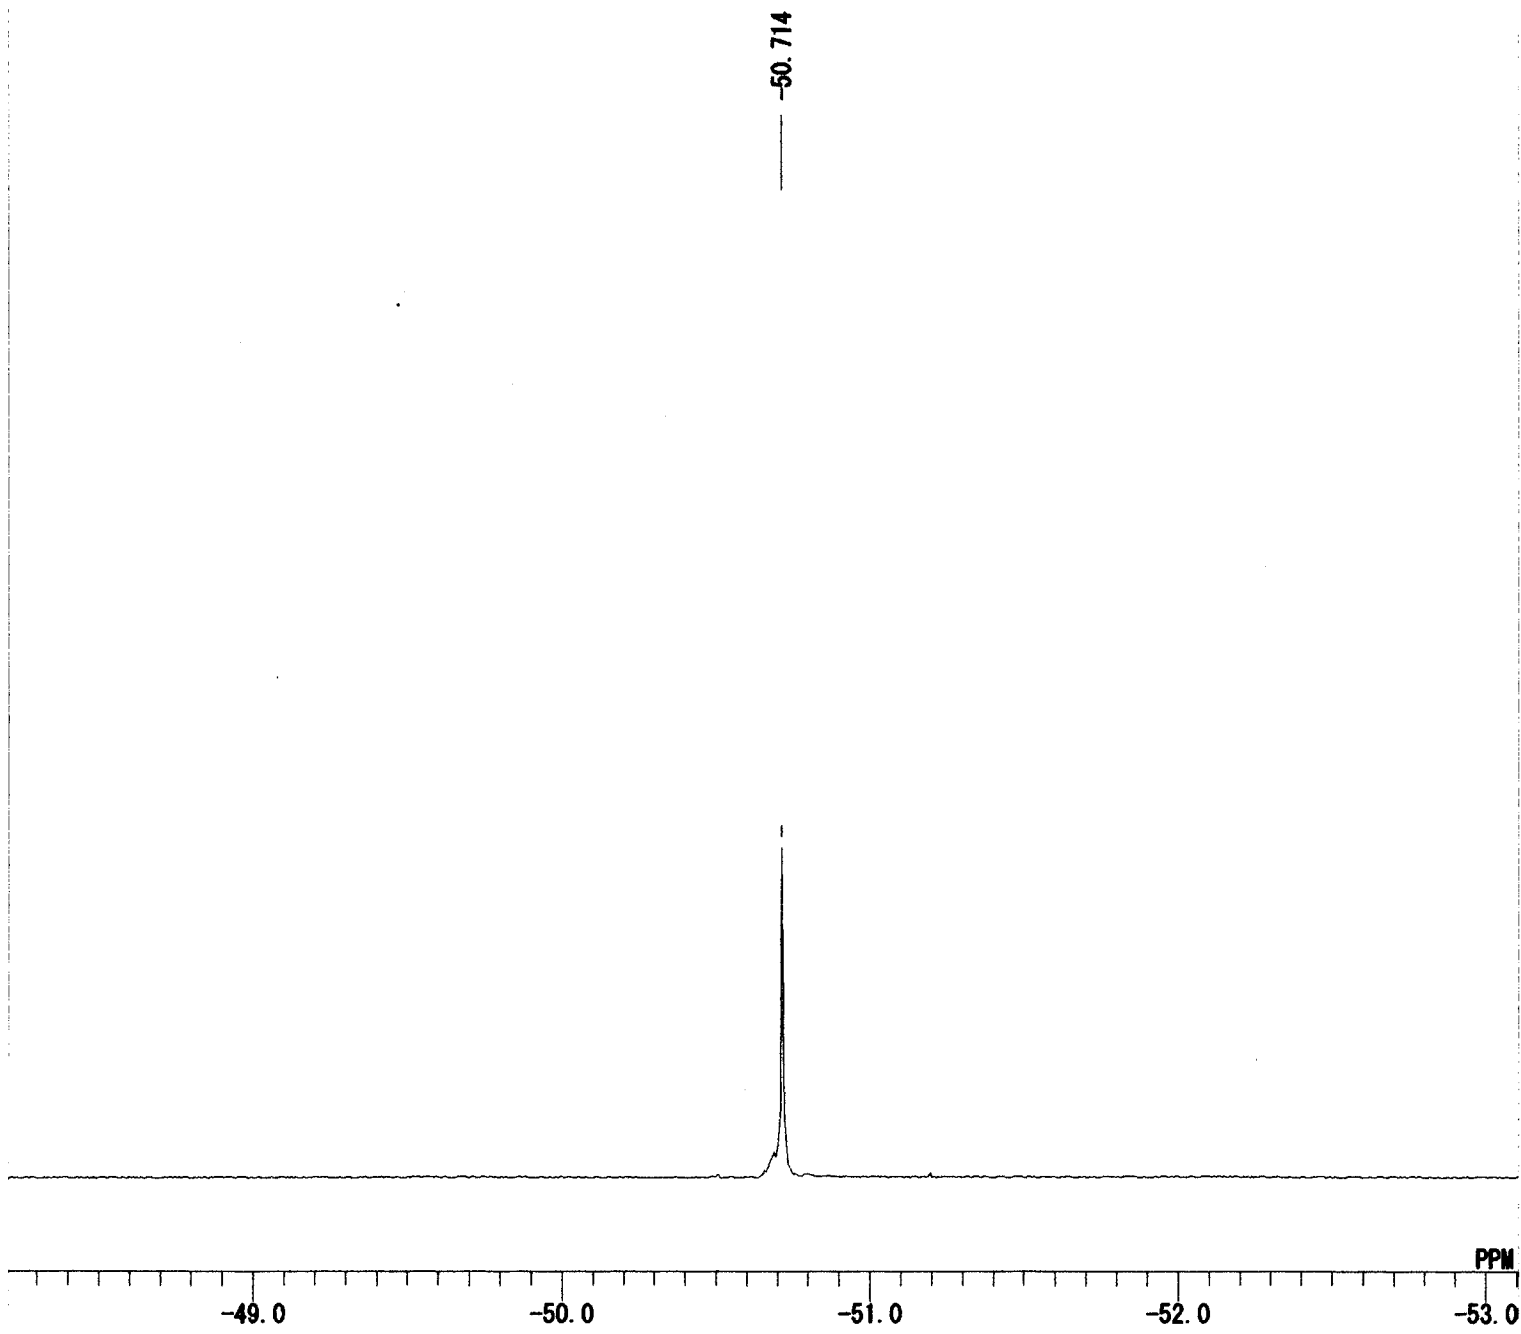

```

MENUF 19F
OBNUC 19F
OFR      376.05 MHz
OBSET    139.60 KHz
OBFIN    36.10 Hz
PW1      6.00 usec
DEADT    10.00 usec
PREDL    0.20000 msec
IWT      1.0000 msec
POINT    32768
SPO      32768
TIMES    16
DUMMY    1
FREQU    80000.00 Hz
FLT      40000 Hz
DELAY    5.00 usec
ACQTM    0.4096 sec
PD       4.9500 sec
ADBIT    16
RGAIN    14
BF       0.10 Hz
T1       0.00
T2       0.00
T3       90.00
T4       100.00
EXMOD    NON
EXPCM    NON:Single.coupled:PW1_ACQTM.
IRNUC    1H
IFR      399.65 MHz
IRSET    124.00 KHz
IRFIN    10500.00 Hz
IRRPW    45 usec
IRATN    511
DFILE    product-diyne-PhMe-di(CO2Me)-
SF        TH5ATFG2
LKSET    61.60 KHz
LKFIN    79.0 Hz
LKLEV    180
LGAIN    25
LKPHS    250
LKSIG    1701
CSPED    12 Hz
FILDC
FILDF
    
```

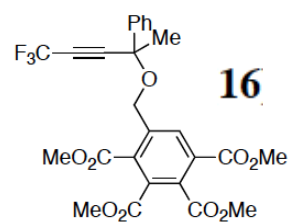



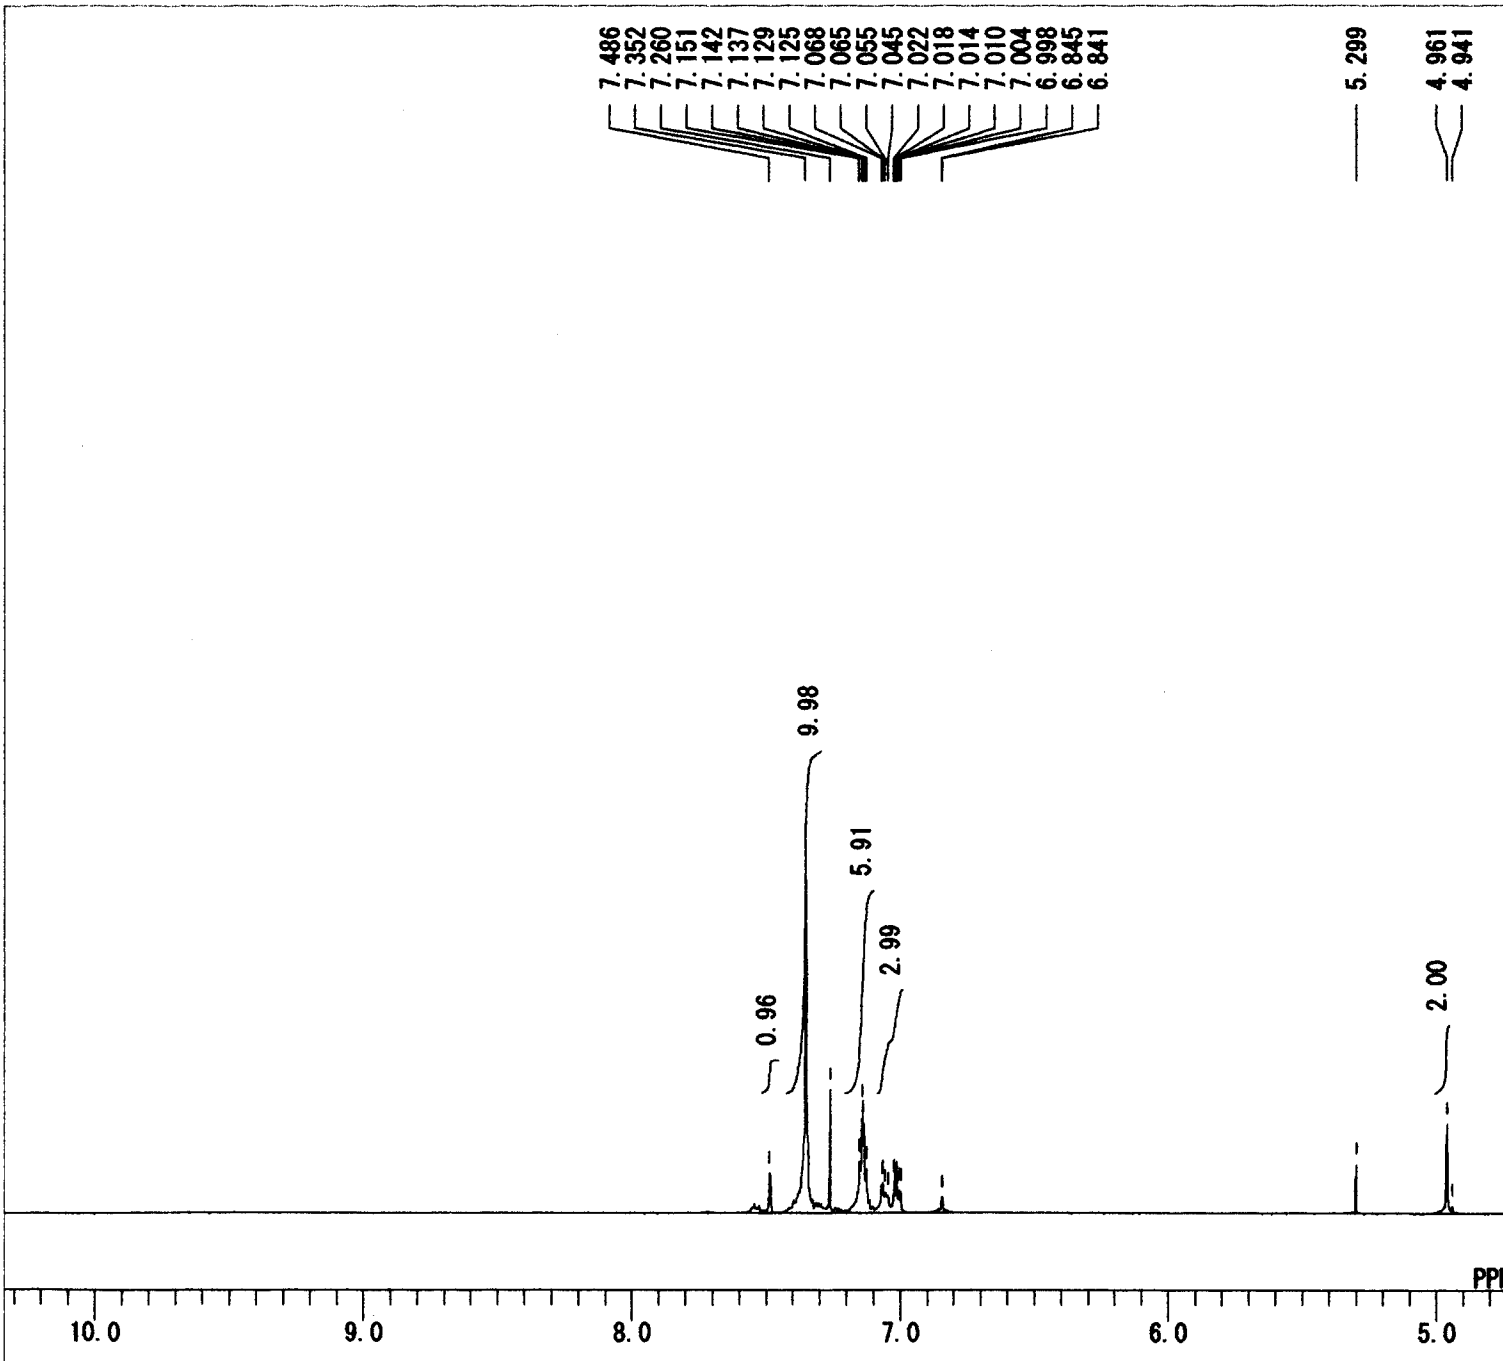

```

MENUF 1H
OBNUC 1H
OFR 399.65 MHz
OBSET 135.40 KHz
OBFIN 24.90 Hz
PW1 5.80 usec
DEADT 72.10 usec
PREDL 0.20000 msec
IWT 1.0000 msec
POINT 16384
SPO 16384
TIMES 8
DUMMY 1
FREQU 7992.01 Hz
FLT 4000 Hz
DELAY 50.00 usec
ACQTM 2.0501 sec
PD 4.9500 sec
ADBIT 16
RGAIN 19
BF 0.10 Hz
T1 0.00
T2 0.00
T3 90.00
T4 100.00
EXMOD NON
EXPCM NON:Single.coupled:PW1_ACQTM
IRNUC 1H
IFR 399.65 MHz
IRSET 136.90 KHz
IRFIN 97.50 Hz
IRRPW 45 usec
IRATN 511
DFILE CF3-Diyne (PhPh)-H+diphenylacetone
SF TH5ATFG2
LKSET 61.60 KHz
LKFIN 79.0 Hz
LKLEV 180
LGAIN 24
LKPHS 250
LKSIG 1270
CSPED 13 Hz
FILDC
FILDF

```

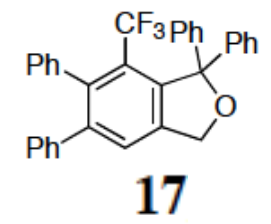

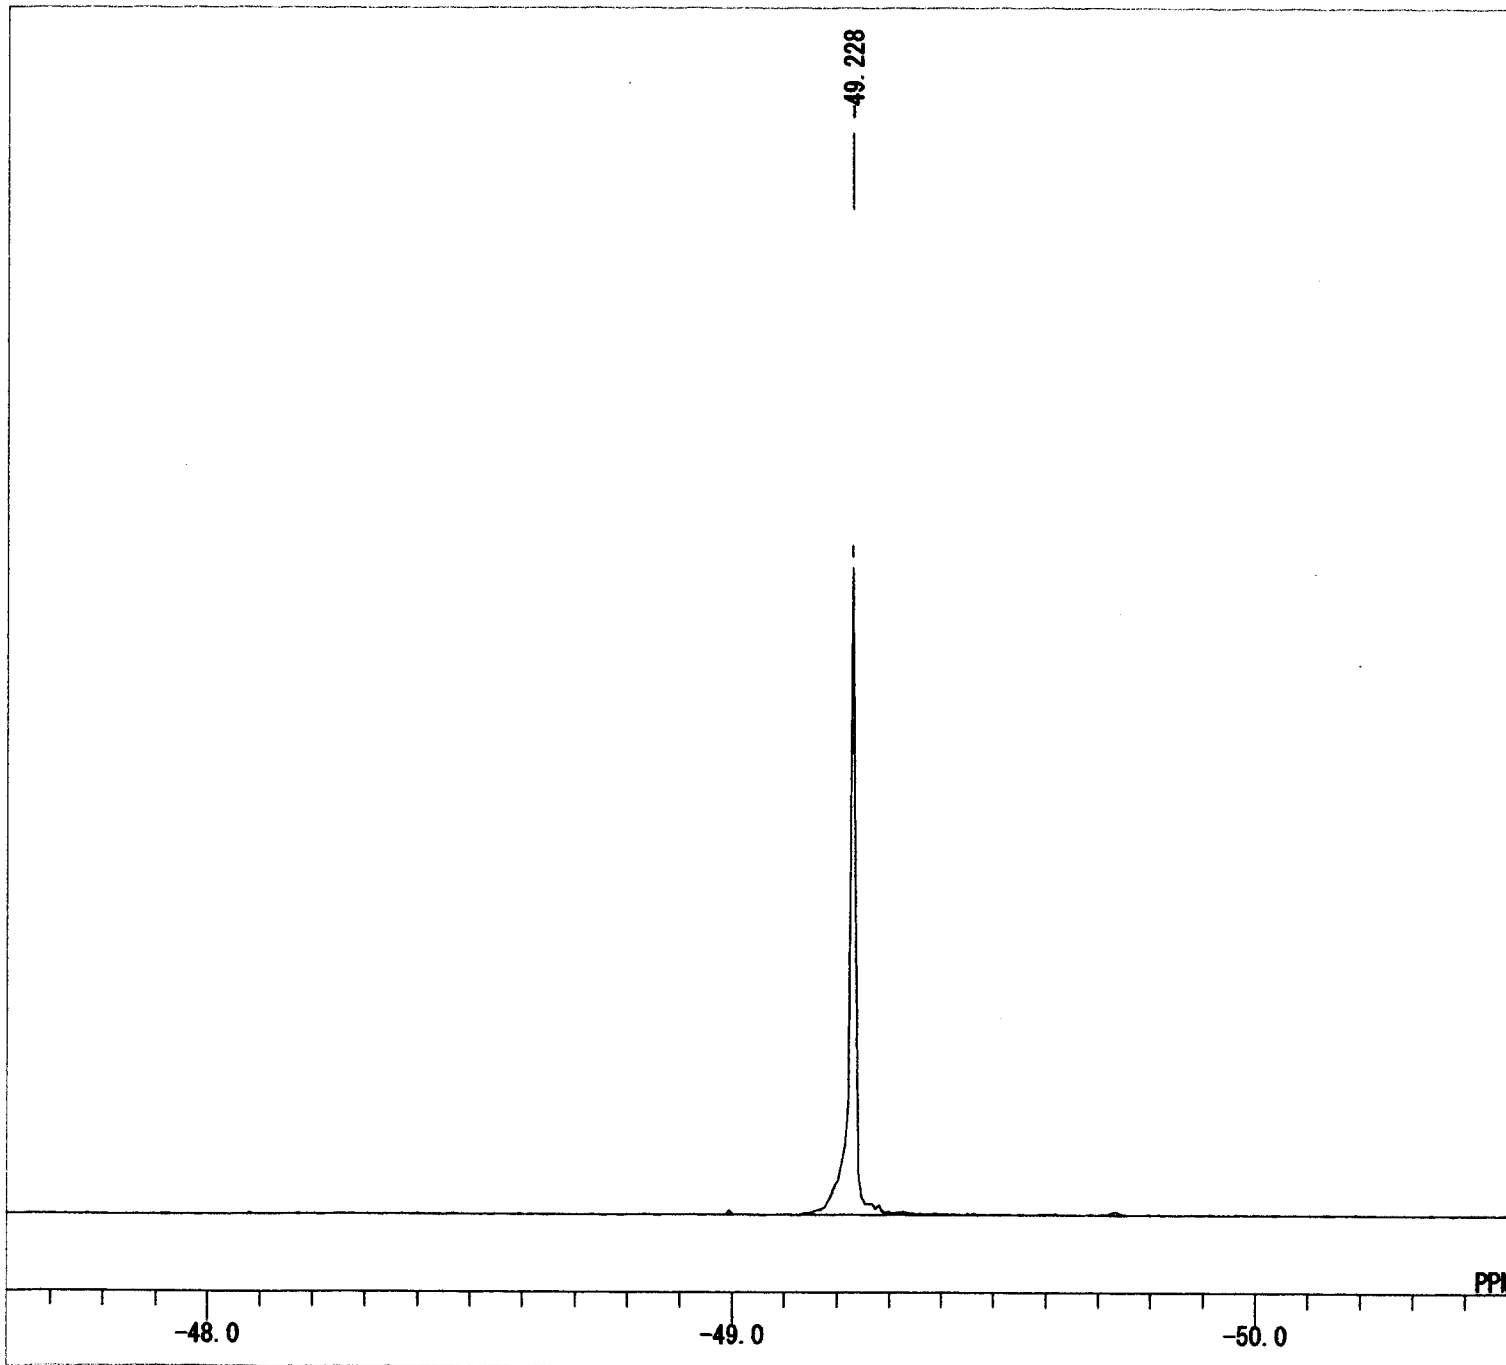

```

MENUF 19F
OBNUC 19F
OFR      376.05 MHz
OBSET    139.60 KHz
OBFIN    36.10 Hz
PW1      6.00 usec
DEADT    10.00 usec
PREDL    0.20000 msec
IWT      1.0000 msec
POINT    32768
SPO      32768
TIMES    16
DUMMY    1
FREQU    80000.00 Hz
FLT      40000 Hz
DELAY    5.00 usec
ACQTM    0.4096 sec
PD       4.9500 sec
ADBIT    16
RGAIN    14
BF       0.10 Hz
T1       0.00
T2       0.00
T3       90.00
T4       100.00
EXMOD    NON
EXPCM    NON:Single.coupled:PW1_ACQTM
IRNUC    1H
IFR      399.65 MHz
IRSET    124.00 KHz
IRFIN    10500.00 Hz
IRRPW    45 usec
IRATN    511
DFILE    CF3-Diyne (PhPh)-H+diphenyl lact
SF       TH5ATFG2
LKSET    61.60 KHz
LKFIN    79.0 Hz
LKLEV    180
LGAIN    24
LKPHS    250
LKSIG    1267
CSPED    13 Hz
FILDC
FILDF

```

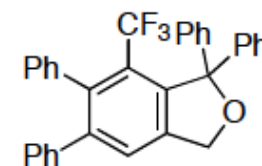

17

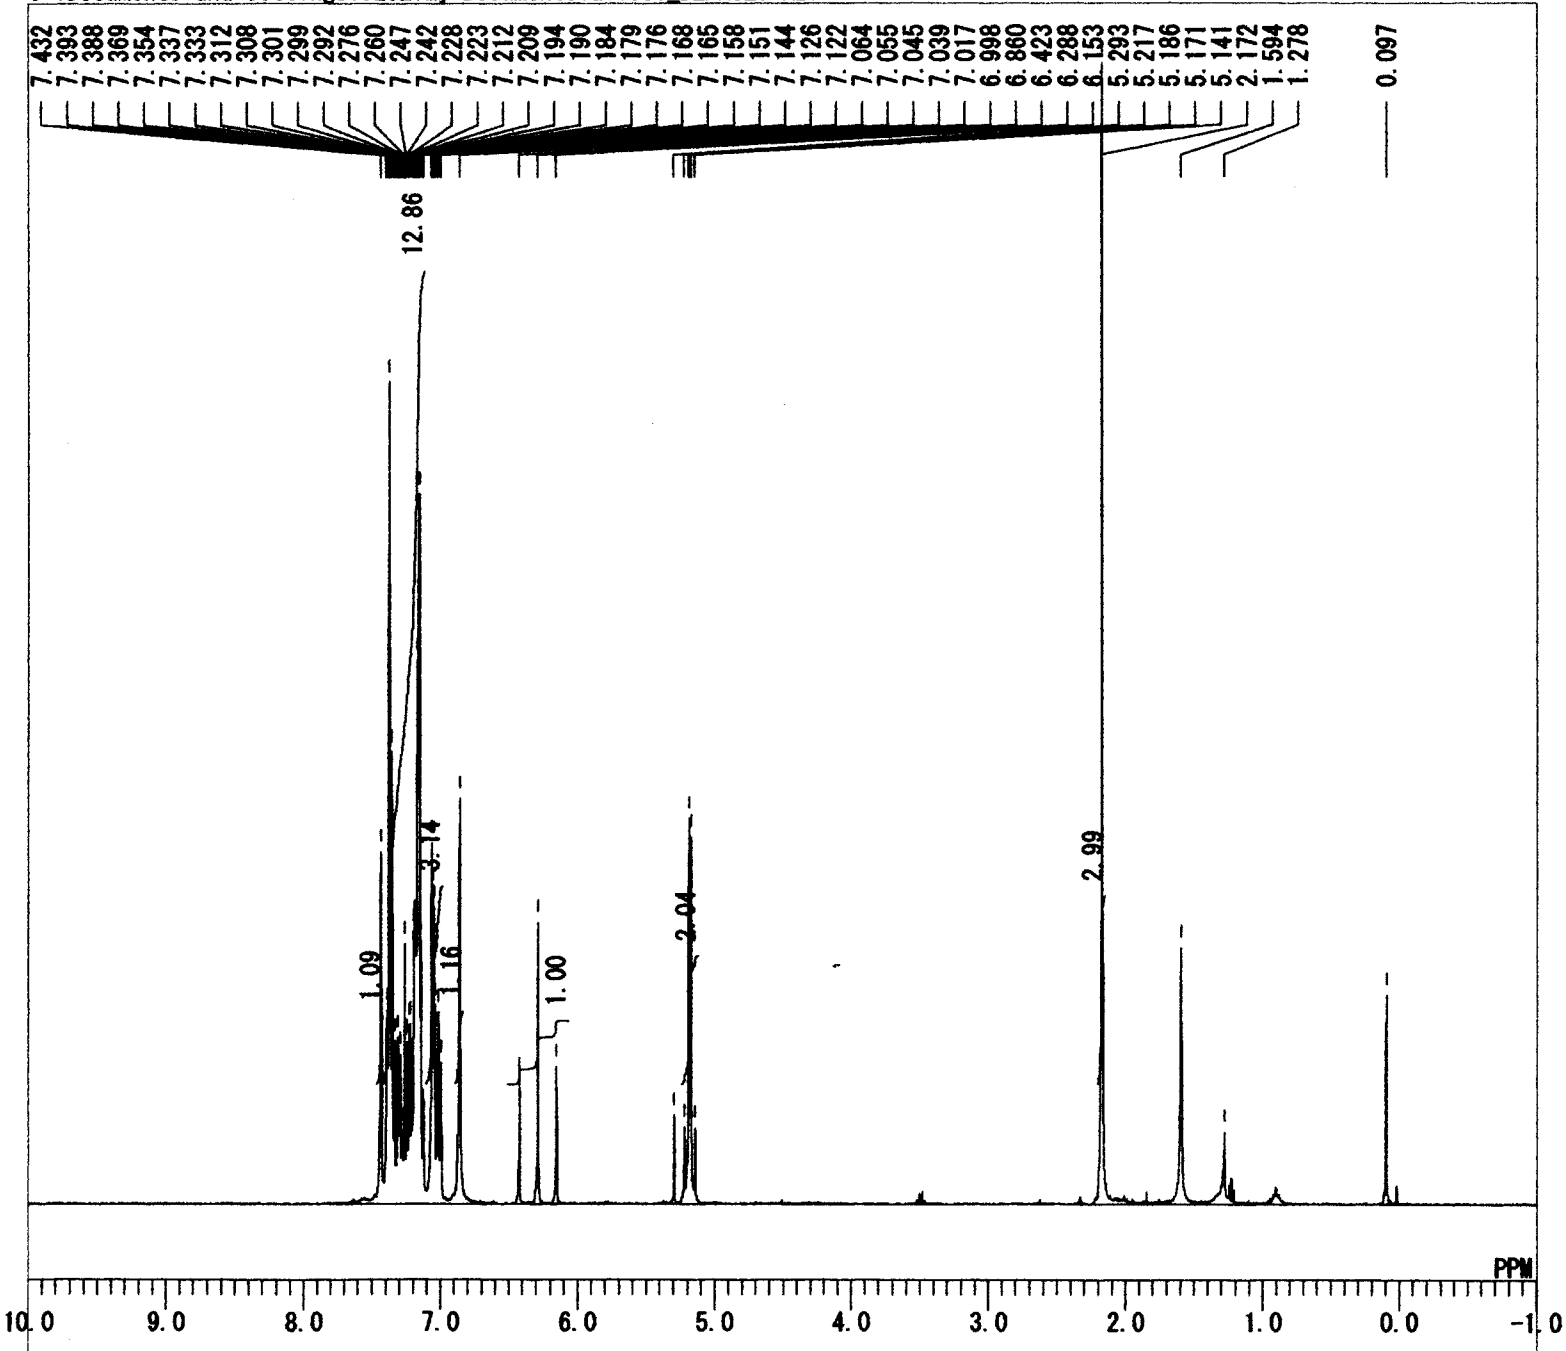

MENUF 1H  
 OBNUC 1H  
 OFR 399.65 MHz  
 OBSET 135.40 KHz  
 OBFIN 24.90 Hz  
 PW1 5.80 usec  
 DEADT 72.10 usec  
 PREDL 0.20000 msec  
 IWT 1.0000 msec  
 POINT 16384  
 SPO 16384  
 TIMES 8  
 DUMMY 1  
 FREQU 7992.01 Hz  
 FLT 4000 Hz  
 DELAY 50.00 usec  
 ACQTM 2.0501 sec  
 PD 4.9500 sec  
 ADBIT 16  
 RGAIN 13  
 BF 0.10 Hz  
 T1 0.00  
 T2 0.00  
 T3 90.00  
 T4 100.00  
 EXMOD NON  
 EXPCM NON:Single.coupled:PW1\_ACQTM.  
 IRNUC 1H  
 IFR 399.65 MHz  
 IRSET 136.90 KHz  
 IRFIN 97.50 Hz  
 IRRPW 45 usec  
 IRATN 511  
 DF ILE DEFAULT.ALS  
 SF TH5ATFG2  
 LKSET 61.60 KHz  
 LKFIN 79.0 Hz  
 LKLEV 180  
 LGAIN 22  
 LKPHS 250  
 LKSIG 670  
 CSPED 11 Hz  
 FILDC  
 FILDF

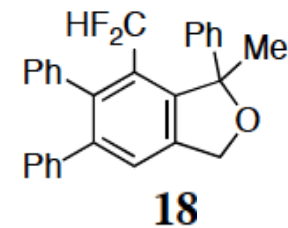

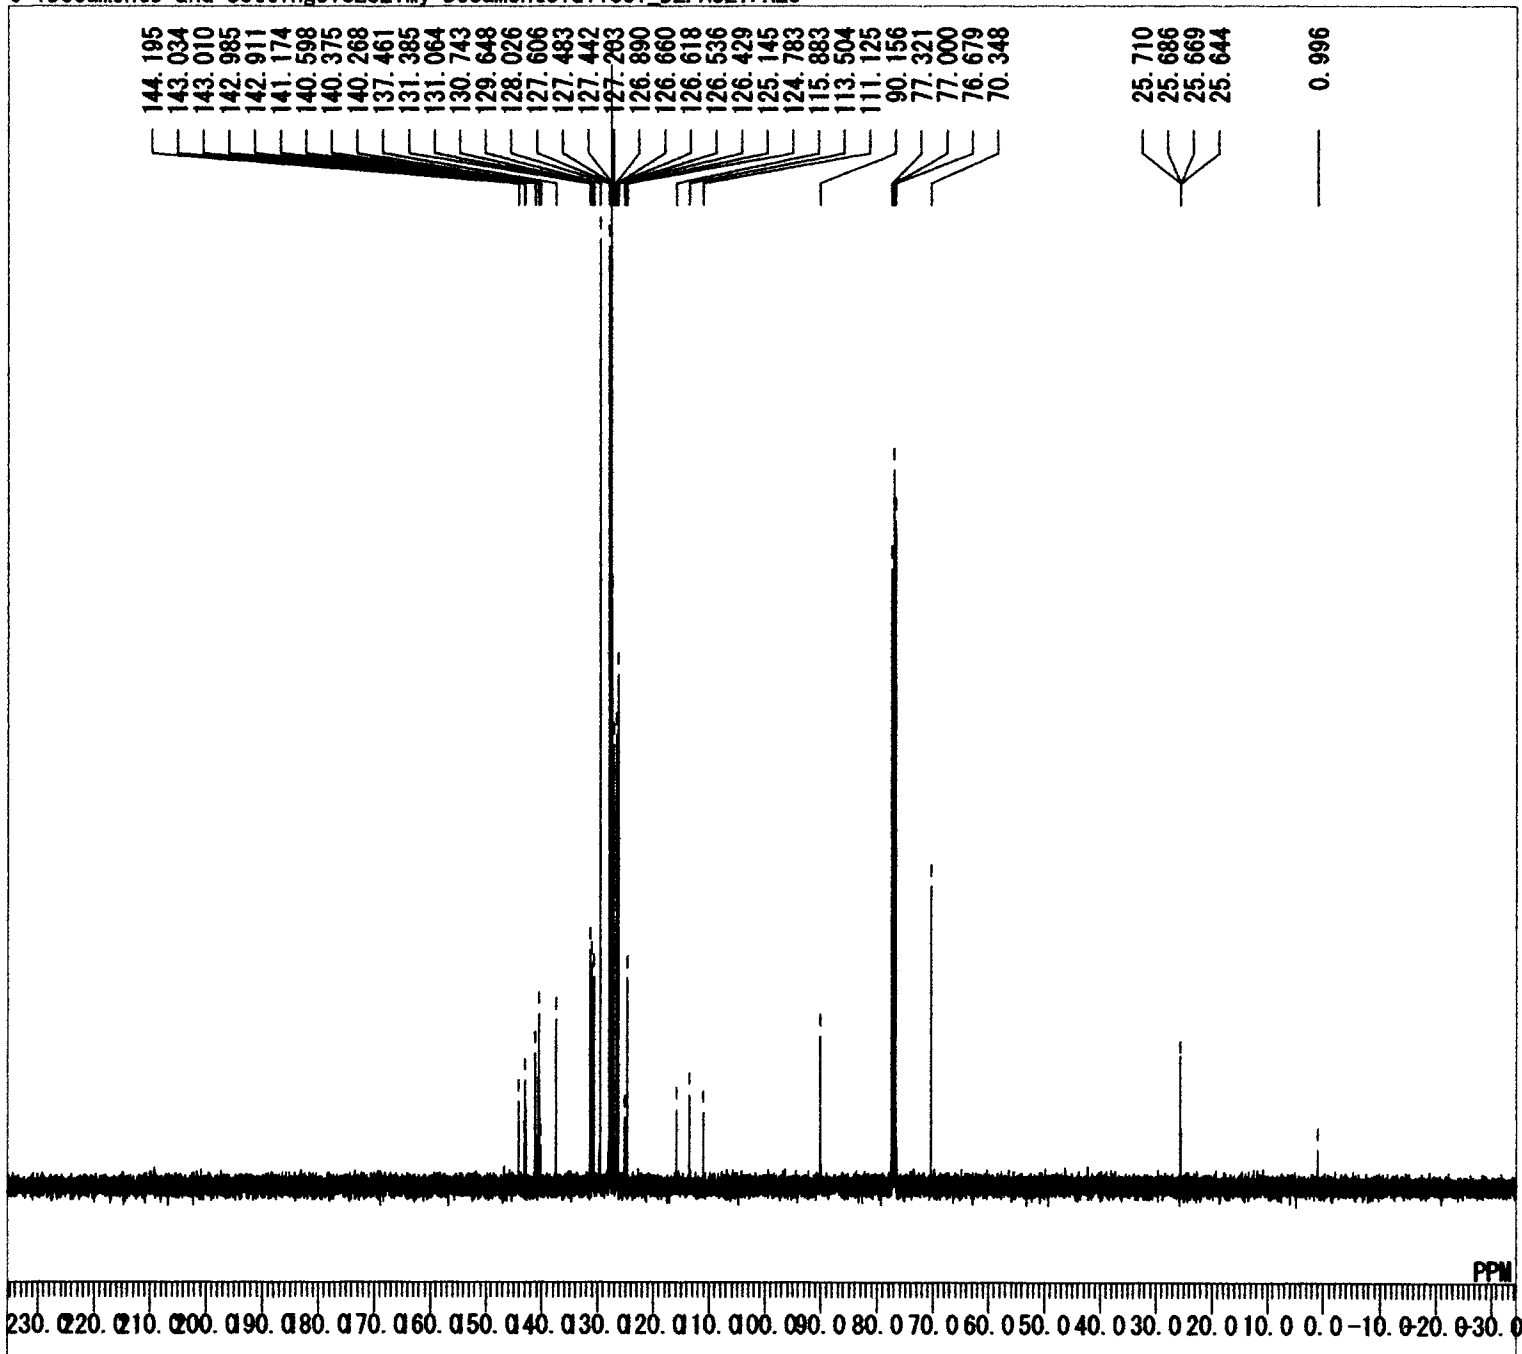

MENUF 13C  
 OBNUC 13C  
 OFR 100.40 MHz  
 OBSET 125.00 KHz  
 OBFIN 10500.00 Hz  
 PW1 6.00 usec  
 DEADT 19.10 usec  
 PREDL 0.2000 msec  
 IWT 1.0000 msec  
 POINT 32768  
 SPO 32768  
 TIMES 512  
 DUMMY 1  
 FREQU 27118.64 Hz  
 FLT 13550 Hz  
 DELAY 14.80 usec  
 ACQTM 1.2083 sec  
 PD 1.7920 sec  
 ADBIT 16  
 RGAIN 25  
 BF 0.10 Hz  
 T1 0.00  
 T2 0.00  
 T3 90.00  
 T4 100.00  
 EXMOD BCM  
 EXPCM Bilevel. complete. decoupling:  
 IRNUC 1H  
 IFR 399.65 MHz  
 IRSET 124.00 KHz  
 IRFIN 10500.00 Hz  
 IRRPW 45 usec  
 IRATN 511  
 DF FILE DEFAULT.ALS  
 SF TH5ATFG2  
 LKSET 61.60 KHz  
 LKFIN 79.0 Hz  
 LKLEV 180  
 LGAIN 22  
 LKPHS 250  
 LKSIG 658  
 CSPED 11 Hz  
 FILDC  
 FILDF

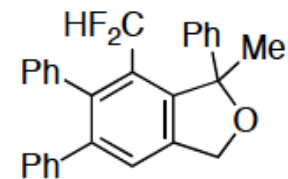

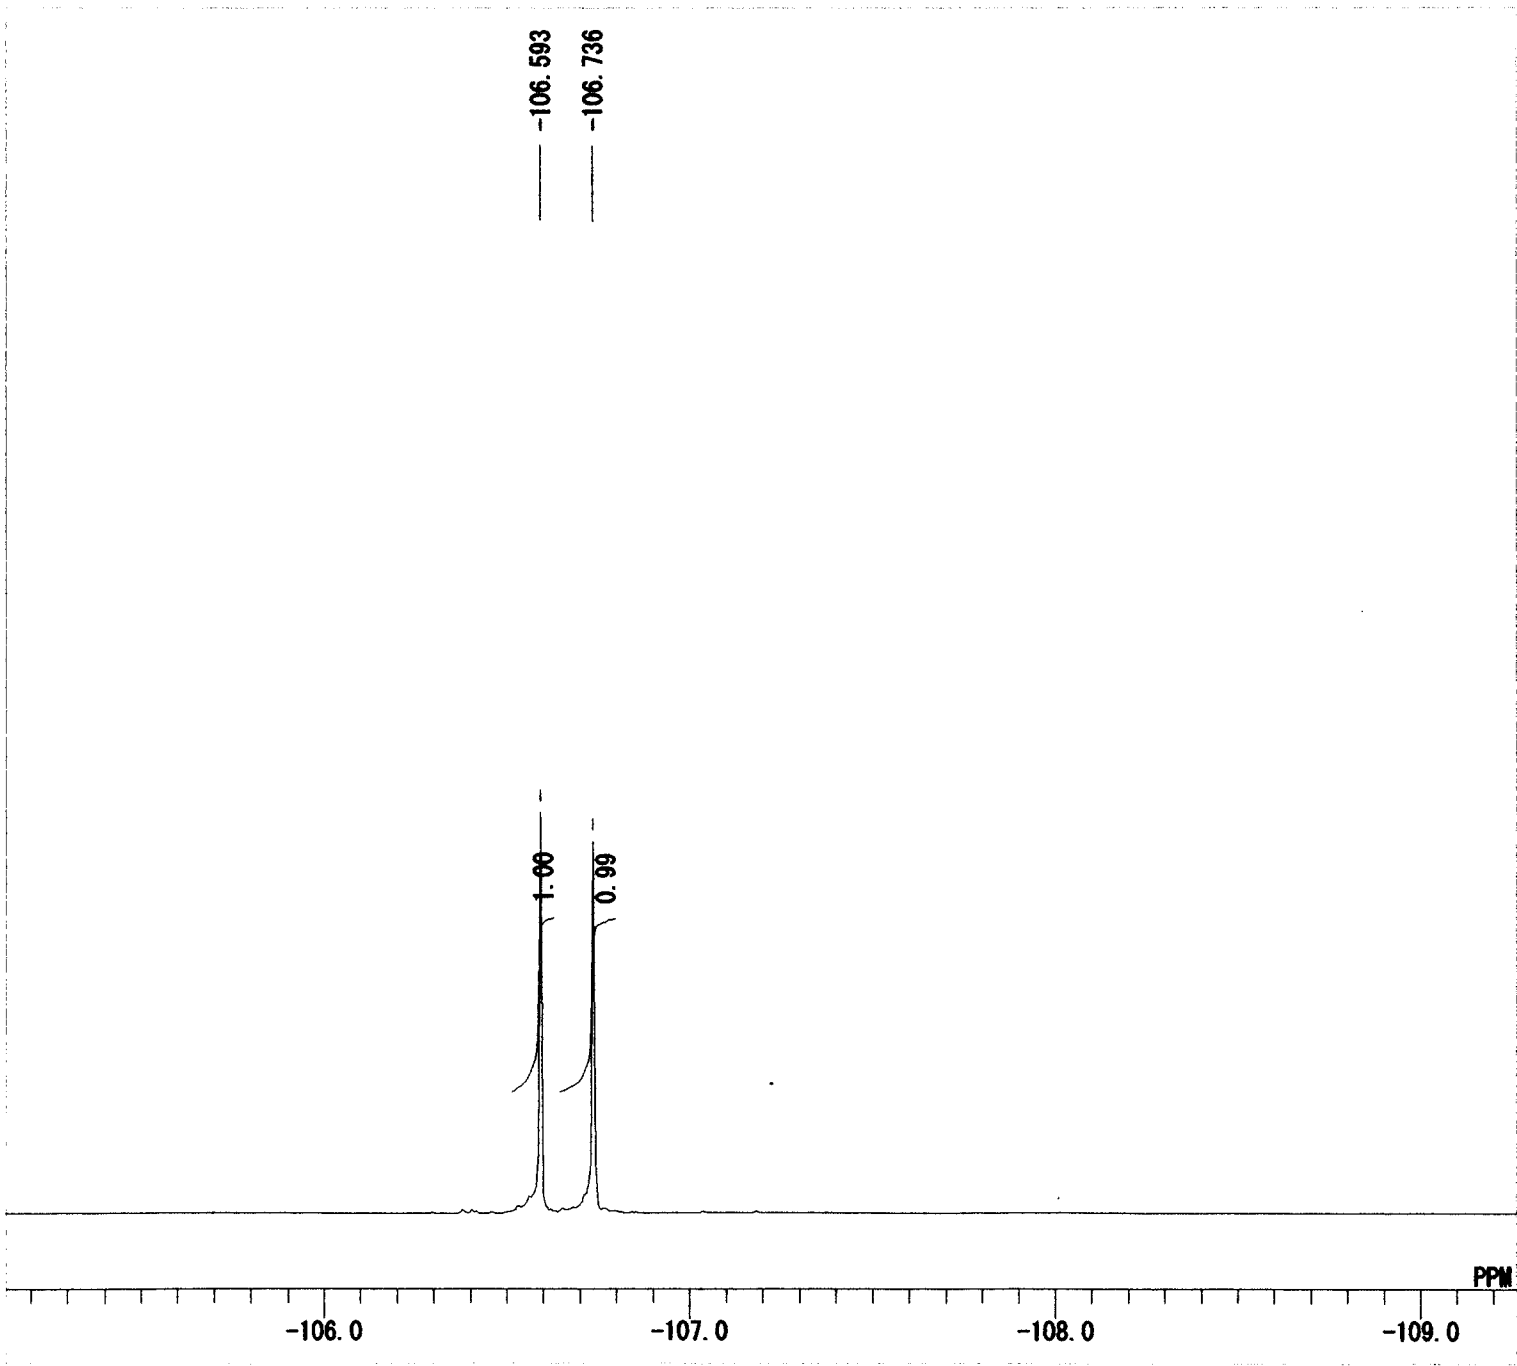

```

MENUF 19F
OBNUC 19F
OFR 376.05 MHz
OBSET 139.60 KHz
OBFIN 36.10 Hz
PW1 6.00 usec
DEADT 10.00 usec
PREDL 0.20000 msec
IWT 1.0000 msec
POINT 32768
SPO 32768
TIMES 16
DUMMY 1
FREQU 80000.00 Hz
FLT 40000 Hz
DELAY 5.00 usec
ACQTM 0.4096 sec
PD 4.9500 sec
ADBIT 16
RGAIN 14
BF 0.10 Hz
T1 0.00
T2 0.00
T3 90.00
T4 100.00
EXMOD NON
EXPCM NON:Single.coupled:PW1_ACQTM
IRNUC 1H
IFR 399.65 MHz
IRSET 124.00 KHz
IRFIN 10500.00 Hz
IRRPW 45 usec
IRATN 511
DFILE product-diyne-HCF2-PhMe-diPh
SF TH5ATFG2
LKSET 61.60 KHz
LKFIN 79.0 Hz
LKLEV 180
LGAIN 24
LKPHS 250
LKSIG 1125
CSPED 10 Hz
FILDC
FILDF

```

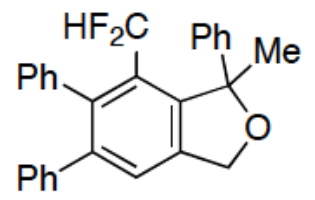

18

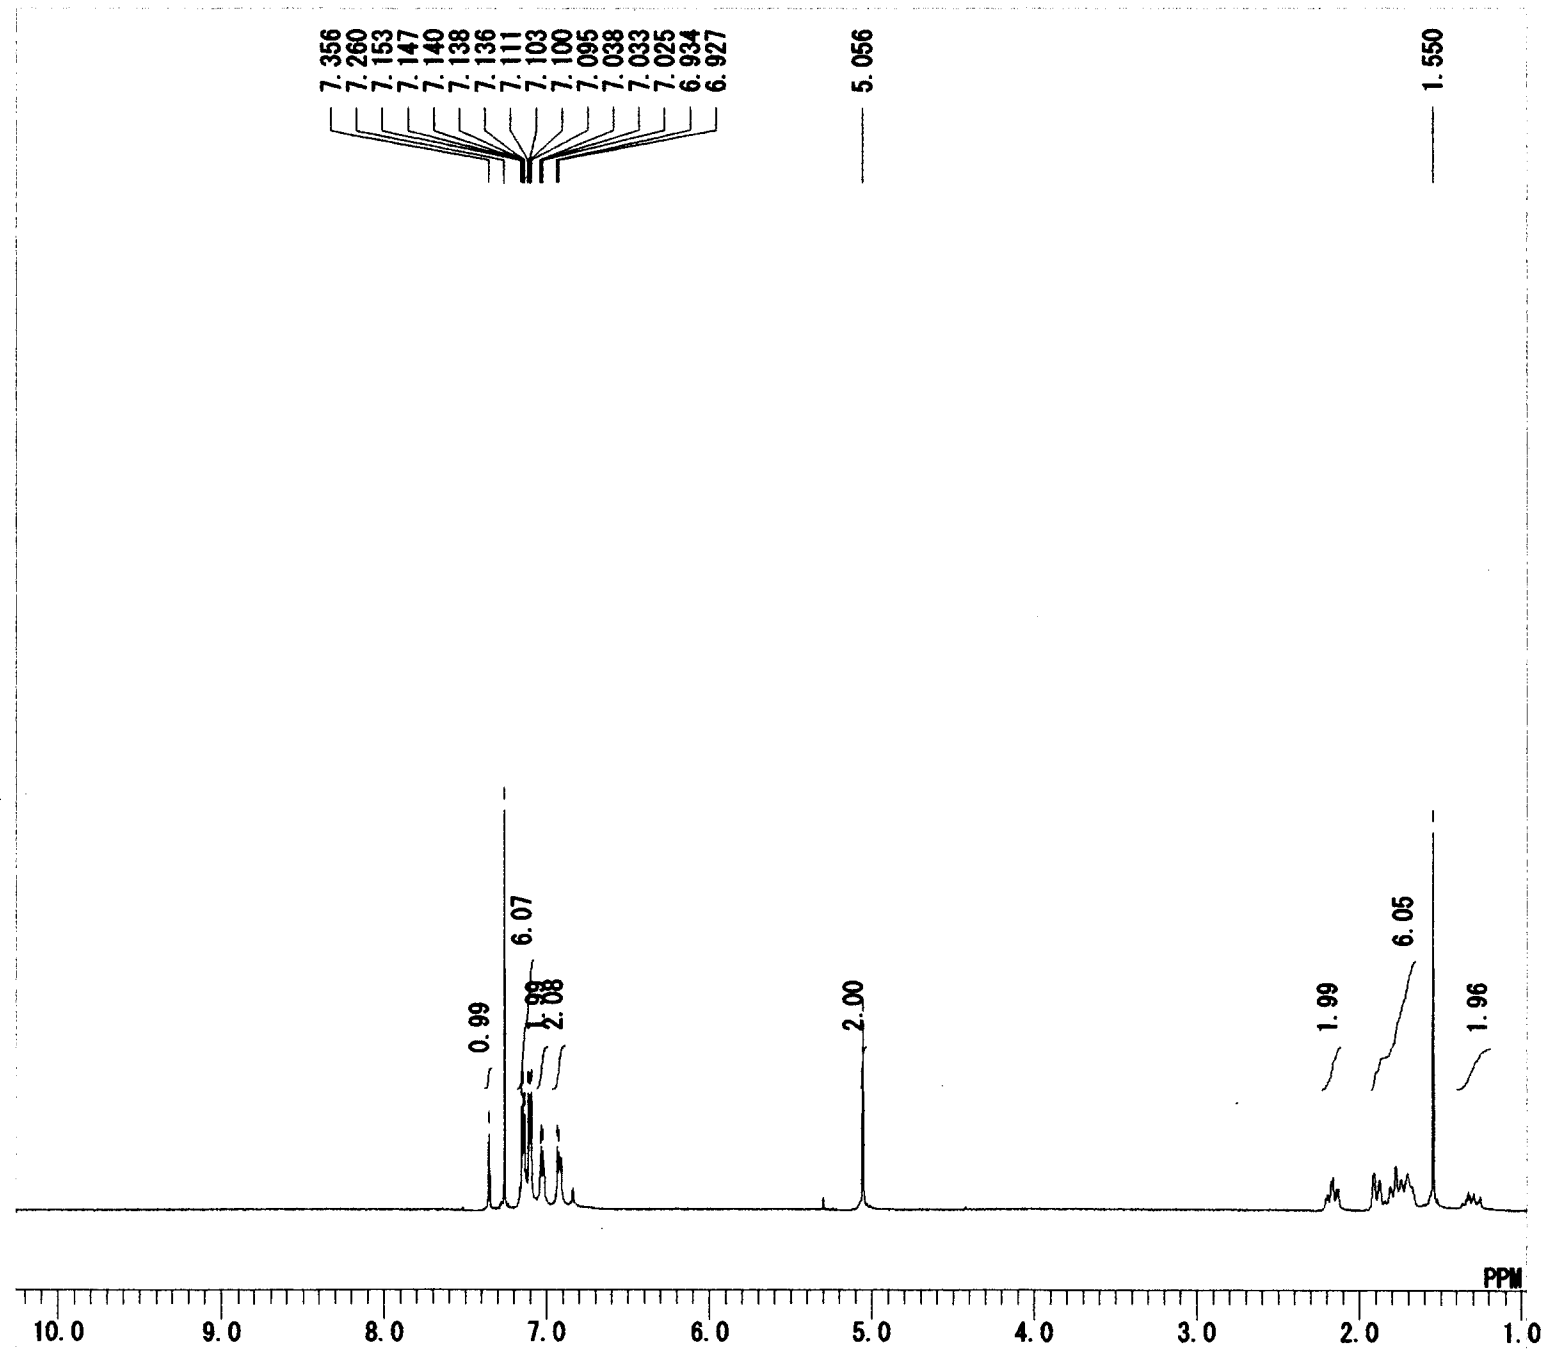

```

MENUF 1H
OBNUC 1H
OFR 399.65 MHz
OBSET 135.40 KHz
OBFIN 24.90 Hz
PW1 5.80 usec
DEADT 72.10 usec
PREDL 0.20000 msec
IWT 1.0000 msec
POINT 16384
SPO 16384
TIMES 8
DUMMY 1
FREQU 7992.01 Hz
FLT 4000 Hz
DELAY 50.00 usec
ACQTM 2.0501 sec
PD 4.9500 sec
ADBIT 16
RGAIN 19
BF 0.10 Hz
T1 0.00
T2 0.00
T3 90.00
T4 100.00
EXMOD NON
EXPCM NON:Single.coupled:PW1_ACQTM
IRNUC 1H
IFR 399.65 MHz
IRSET 136.90 KHz
IRFIN 97.50 Hz
IRRPW 45 usec
IRATN 511
DFILE product-diyne-c-Hex-diPh(1H).
SF TH5ATFG2
LKSET 61.60 KHz
LKFIN 79.0 Hz
LKLEV 180
LGA1N 24
LKPHS 250
LKSIG 1271
CSPED 10 Hz
FILDC
FILDF

```

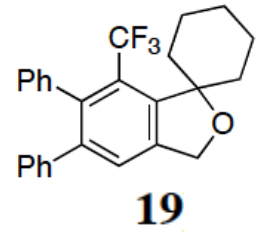

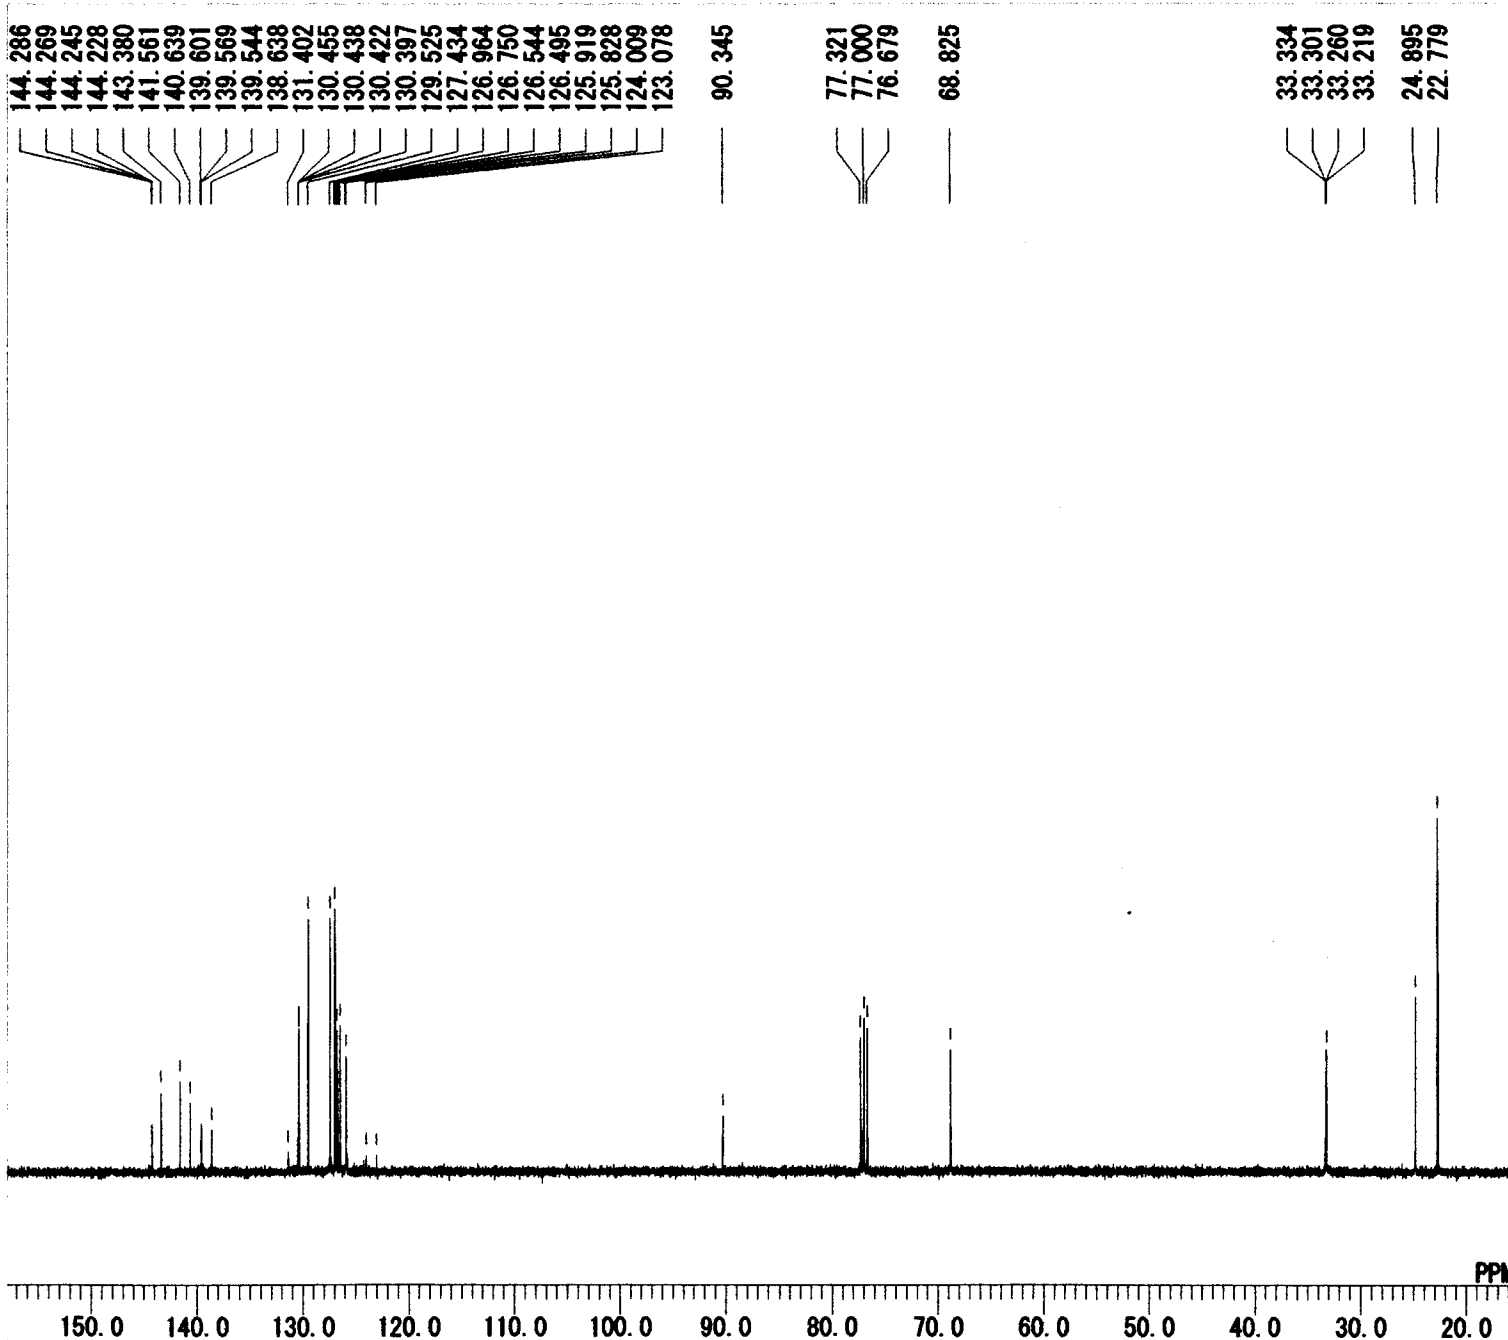

MENUF 13C  
 OBNUC 13C  
 OFR 100.40 MHz  
 OBSET 125.00 KHz  
 OBFIN 10500.00 Hz  
 PW1 6.00 usec  
 DEADT 19.10 usec  
 PREDL 0.20000 msec  
 IWT 1.0000 msec  
 POINT 32768  
 SPO 32768  
 TIMES 256  
 DUMMY 1  
 FREQU 27118.64 Hz  
 FLT 13550 Hz  
 DELAY 14.80 usec  
 ACQTM 1.2083 sec  
 PD 1.7920 sec  
 ADBIT 16  
 RGAIN 25  
 BF 0.10 Hz  
 T1 0.00  
 T2 0.00  
 T3 90.00  
 T4 100.00  
 EXMOD BCM  
 EXPCM Bilevel. complete. decoupling: :  
 IRNUC 1H  
 IFR 399.65 MHz  
 IRSET 124.00 KHz  
 IRFIN 10500.00 Hz  
 IRRPW 45 usec  
 IRATN 511  
 DF FILE product-diyne-c-Hex-diPh (13C)  
 SF TH5ATFG2  
 LKSET 61.60 KHz  
 LKFIN 79.0 Hz  
 LKLEV 180  
 LGAIN 26  
 LKPHS 250  
 LKSIG 1471  
 CSPED 15 Hz  
 FILDC  
 FILDF

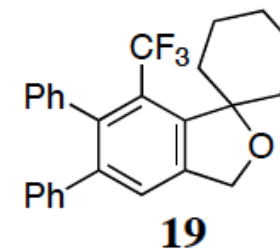

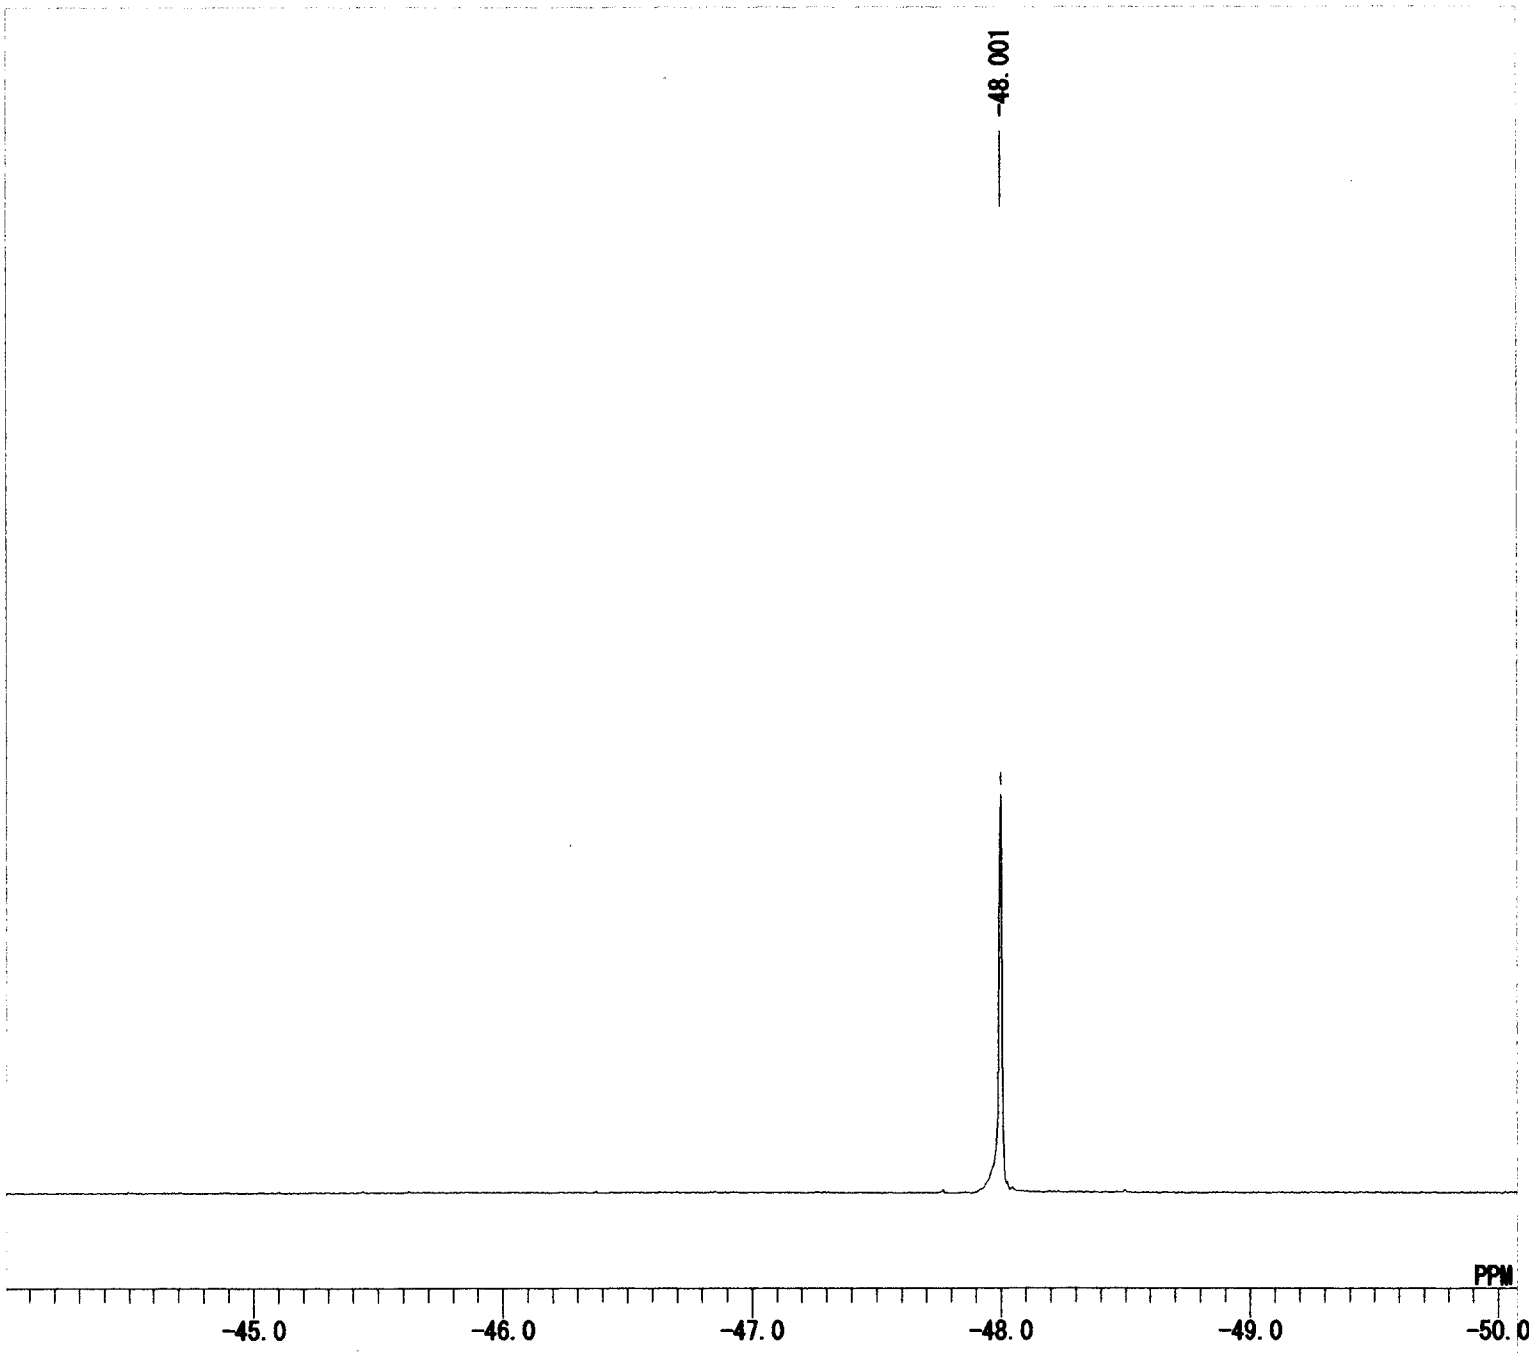

```

MENUF 19F
OBNUC 19F
OFR      376.05 MHz
OBSET    139.60 KHz
OBFIN    36.10 Hz
PW1      6.00 usec
DEADT    10.00 usec
PREDL    0.20000 msec
IWT      1.0000 msec
POINT    32768
SPO      32768
TIMES    16
DUMMY    1
FREQU    80000.00 Hz
FLT      40000 Hz
DELAY    5.00 usec
ACQTM    0.4096 sec
PD       4.9500 sec
ADBIT    16
RGAIN    14
BF       0.10 Hz
T1       0.00
T2       0.00
T3       90.00
T4       100.00
EXMOD    NON
EXPCM    NON:Single.coupled:PW1_ACQTM
IRNUC    1H
IFR      399.65 MHz
IRSET    124.00 KHz
IRFIN    10500.00 Hz
IRRPW    45 usec
IRATN    511
DFILE    product-diyne-c-Hex-diPh(19F)
SF       TH5ATFG2
LKSET    61.60 KHz
LKFIN    79.0 Hz
LKLEV    180
LGAIN    24
LKPHS    250
LKSIG    1269
CSPED    10 Hz
FILDC
FILDF

```

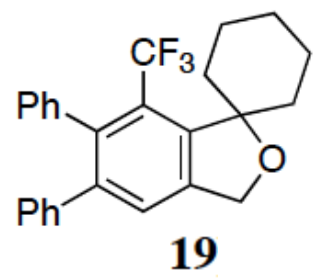



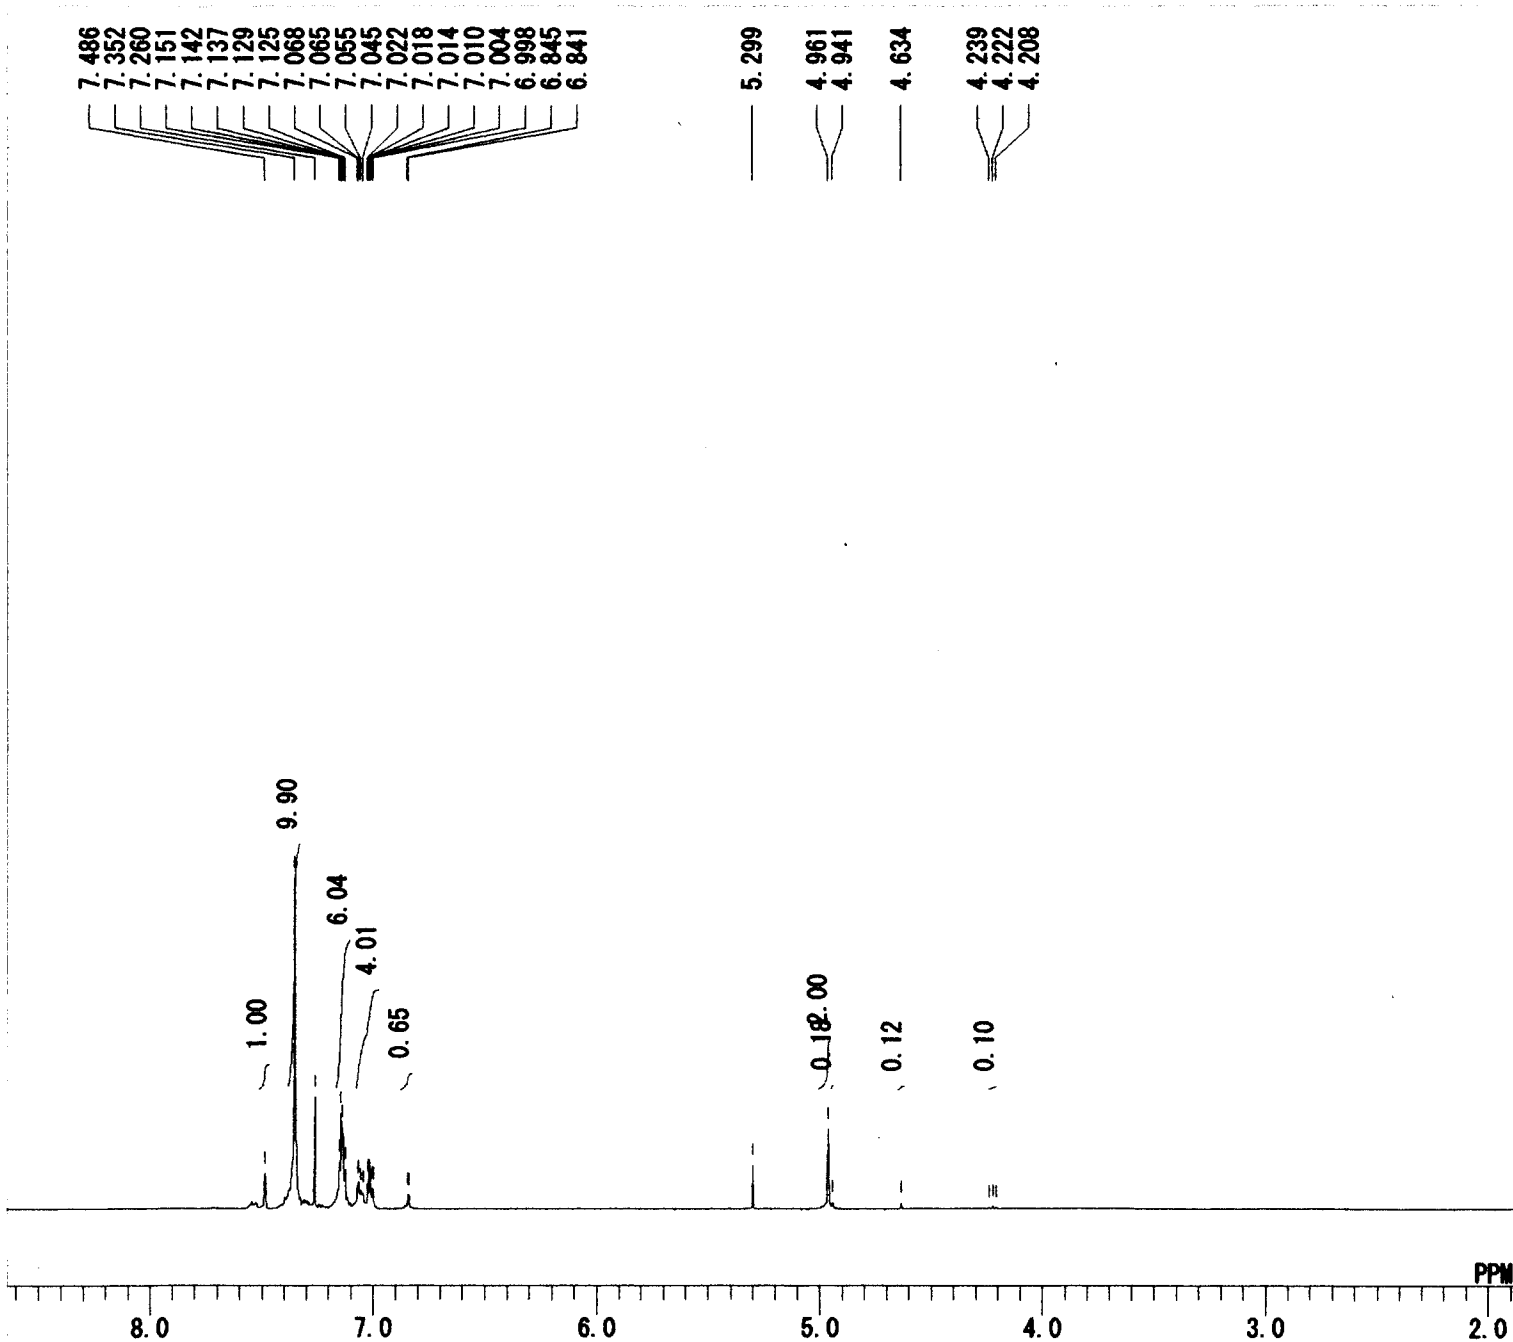

```

MENUF 1H
OBNUC 1H
OFR 399.65 MHz
OBSET 135.40 KHz
OBF IN 24.90 Hz
PW1 5.80 usec
DEADT 72.10 usec
PREDL 0.20000 msec
IWT 1.0000 msec
POINT 16384
SPO 16384
TIMES 8
DUMMY 1
FREQU 7992.01 Hz
FLT 4000 Hz
DELAY 50.00 usec
ACQTM 2.0501 sec
PD 4.9500 sec
ADBIT 16
RGAIN 19
BF 0.10 Hz
T1 0.00
T2 0.00
T3 90.00
T4 100.00
EXMOD NON
EXPCM NON:Single.coupled:PW1_ACQTM
IRNUC 1H
IFR 399.65 MHz
IRSET 136.90 KHz
IRF IN 97.50 Hz
IRRPW 45 usec
IRATN 511
DFILE product-diyne-PhPh-diPh-high-
SF TH5ATFG2
LKSET 61.60 KHz
LKFIN 79.0 Hz
LKLEV 180
LGAIN 24
LKPHS 250
LKSIG 1270
CSPED 13 Hz
FILDC
FILDF

```

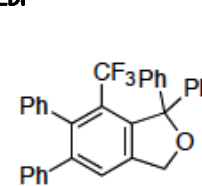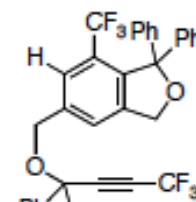

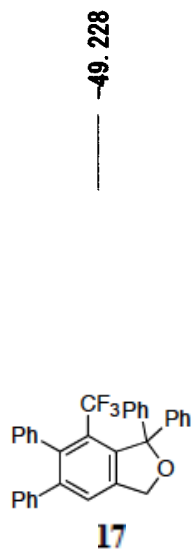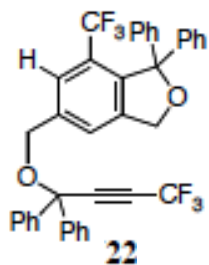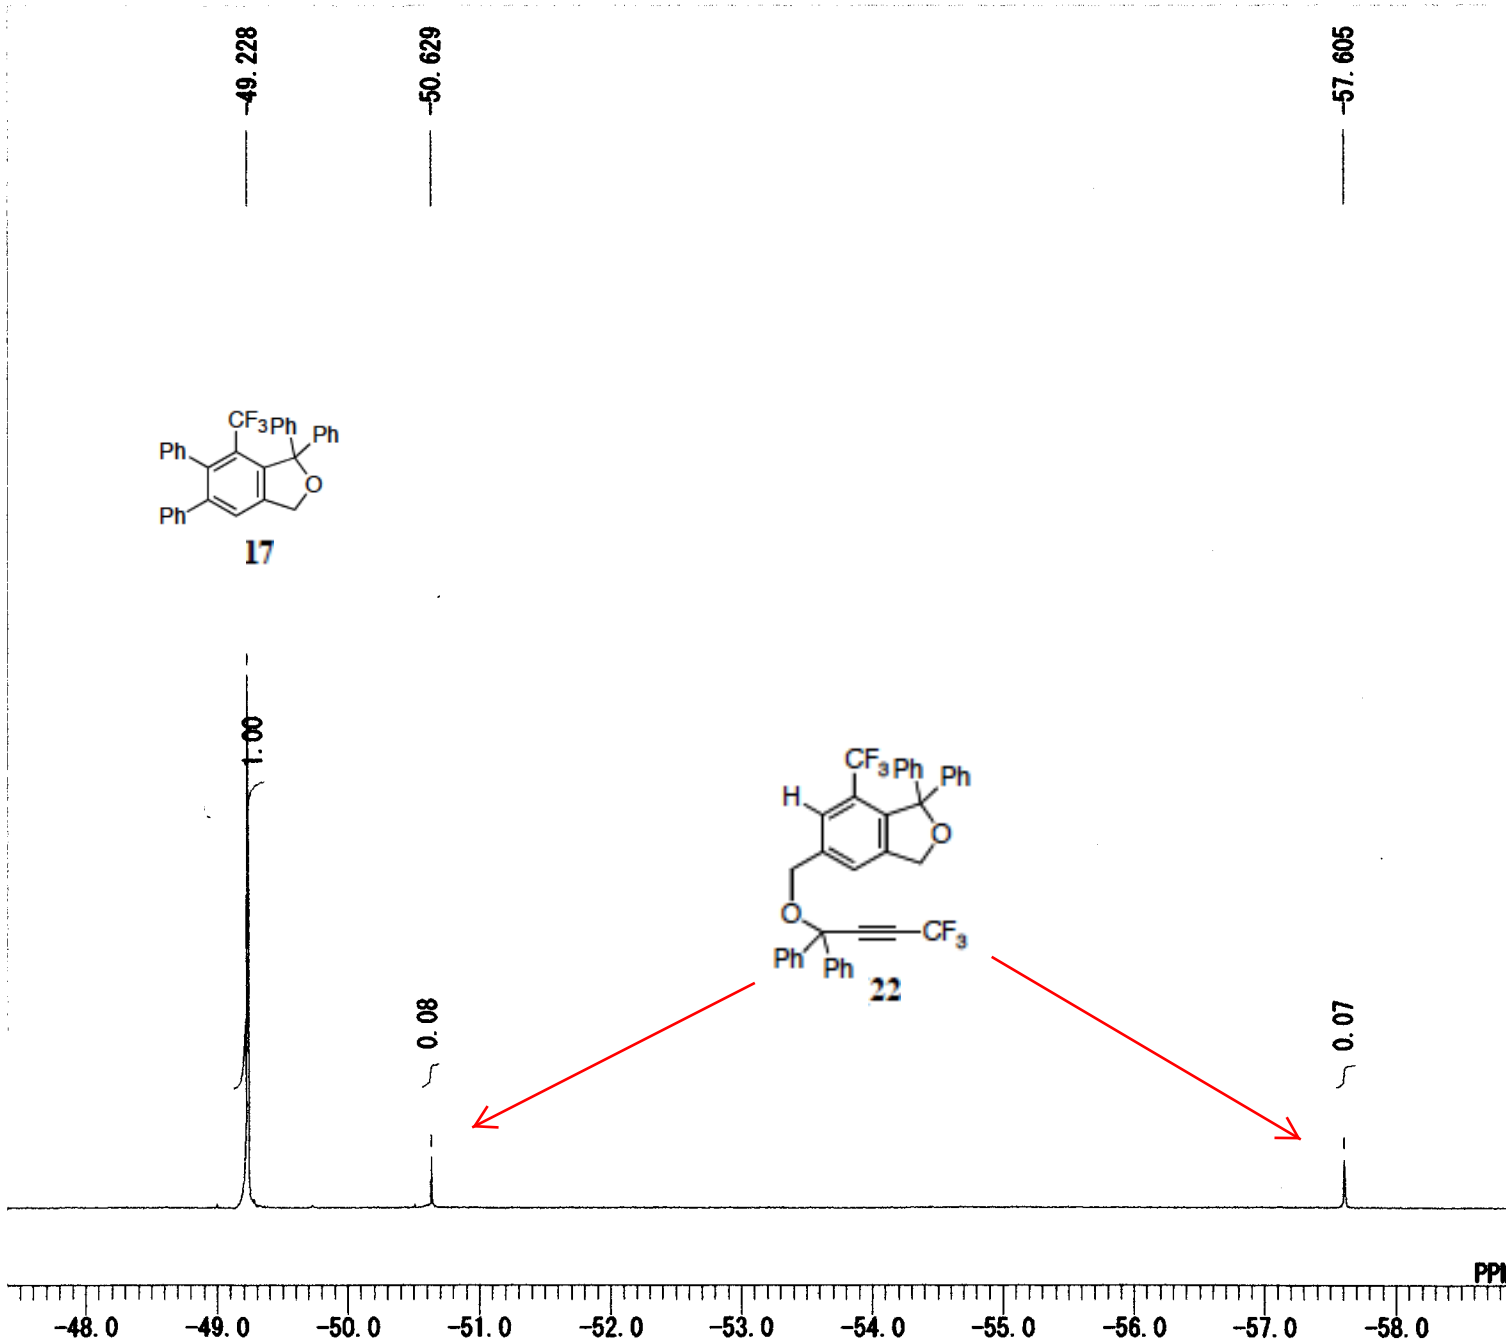

|        |                               |
|--------|-------------------------------|
| MENUF  | 19F                           |
| OBNUC  | 19F                           |
| QFR    | 376.05 MHz                    |
| OBSET  | 139.60 KHz                    |
| OBFIN  | 36.10 Hz                      |
| PW1    | 6.00 usec                     |
| DEADT  | 10.00 usec                    |
| PREDL  | 0.20000 msec                  |
| IWT    | 1.0000 msec                   |
| POINT  | 32768                         |
| SPO    | 32768                         |
| TIMES  | 16                            |
| DUMMY  | 1                             |
| FREQU  | 80000.00 Hz                   |
| FLT    | 40000 Hz                      |
| DELAY  | 5.00 usec                     |
| ACQTM  | 0.4096 sec                    |
| PD     | 4.9500 sec                    |
| ADBIT  | 16                            |
| RGAIN  | 14                            |
| BF     | 0.10 Hz                       |
| T1     | 0.00                          |
| T2     | 0.00                          |
| T3     | 90.00                         |
| T4     | 100.00                        |
| EXMOD  | NON                           |
| EXPCM  | NON:Single.coupled:PW1_ACQTM  |
| IRNUC  | 1H                            |
| IFR    | 399.65 MHz                    |
| IRSET  | 124.00 KHz                    |
| IRFIN  | 10500.00 Hz                   |
| IRRPW  | 45 usec                       |
| IRATN  | 511                           |
| DFILE  | product-diyne-PhPh-diPh-high- |
| SF     | TH5ATFG2                      |
| LKSET  | 61.60 KHz                     |
| LKFIN  | 79.0 Hz                       |
| LKLEV  | 180                           |
| LGA IN | 24                            |
| LKPHS  | 250                           |
| LKSIG  | 1267                          |
| CSPED  | 13 Hz                         |
| FILDC  |                               |
| FILDF  |                               |

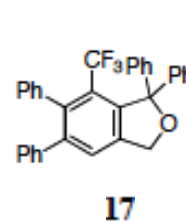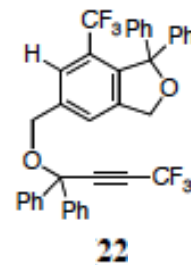

# <sup>19</sup>F NMR Analysis of the reaction mixture (Total yield for all CF<sub>3</sub>-containing compounds : 100%)

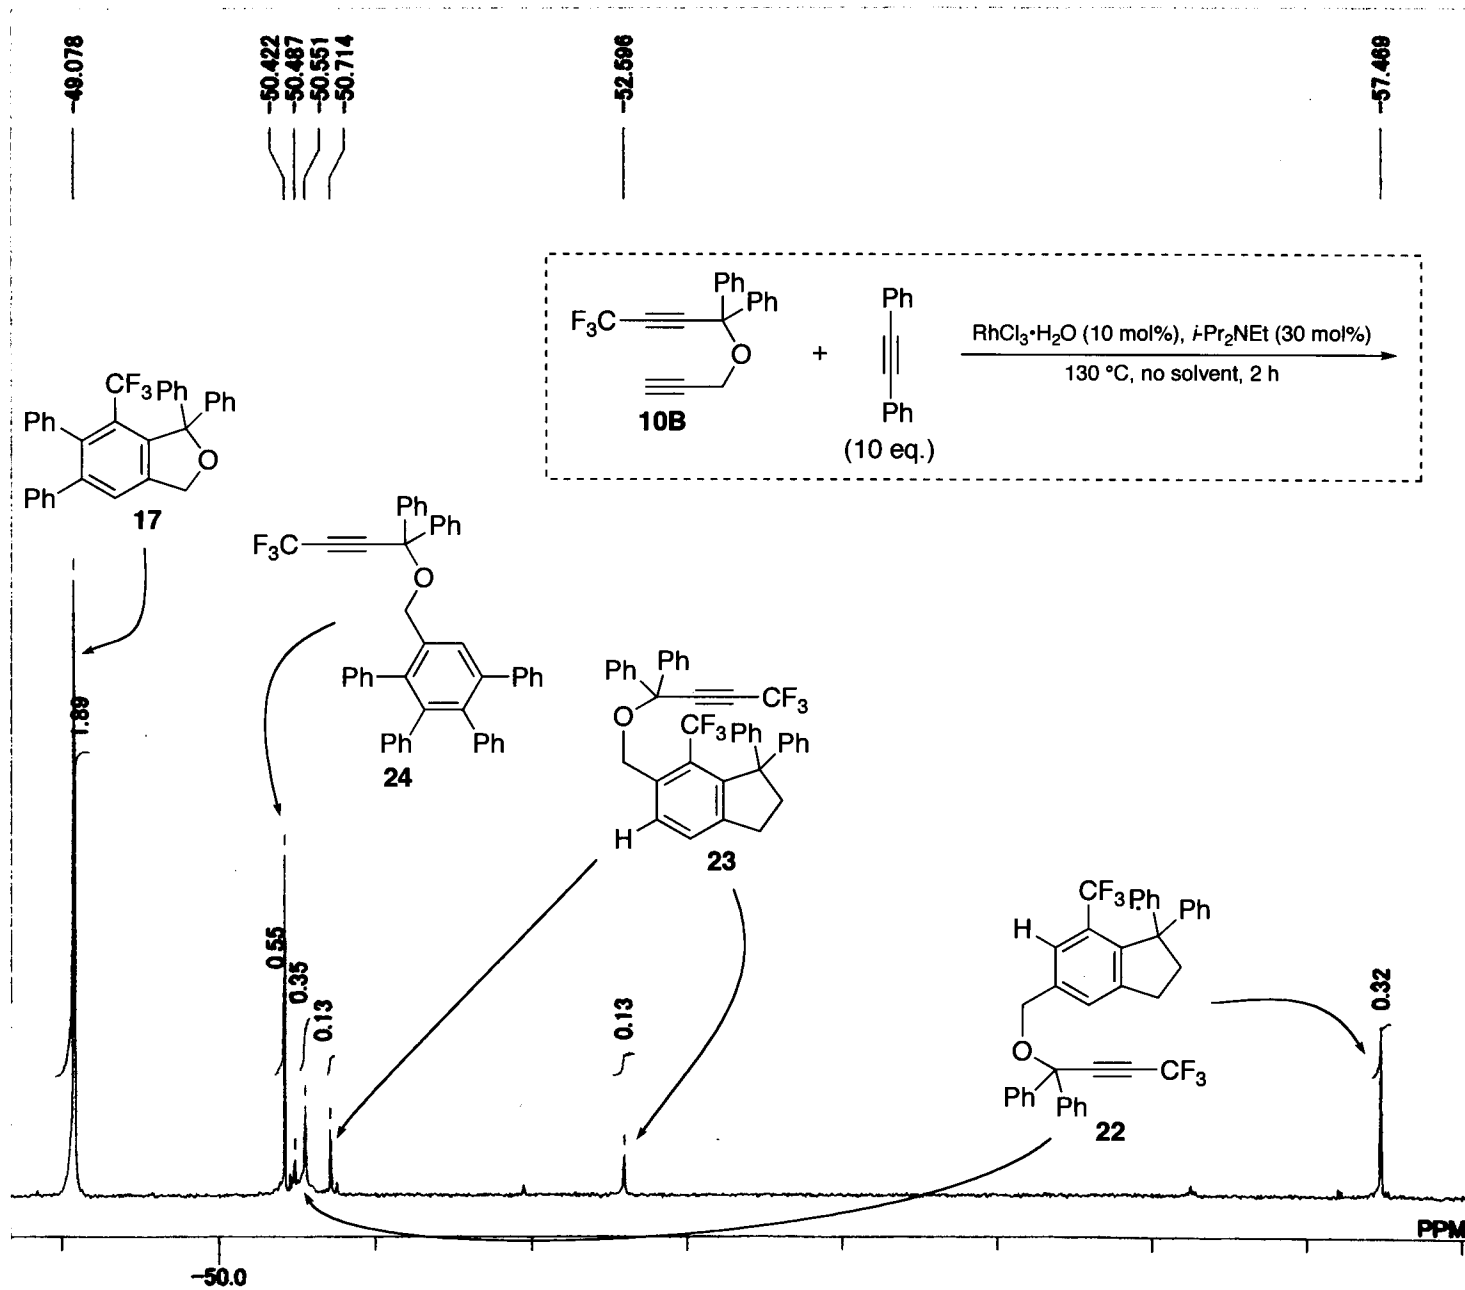

|       |                                 |
|-------|---------------------------------|
| MENUF | 19F                             |
| OBNUC | 19F                             |
| OFR   | 376.05 MHz                      |
| OBSET | 139.60 KHz                      |
| OBFIN | 36.10 Hz                        |
| PW1   | 6.00 usec                       |
| DEADT | 10.00 usec                      |
| PREDL | 0.20000 msec                    |
| IWT   | 1.0000 msec                     |
| POINT | 32768                           |
| SPO   | 32768                           |
| TIMES | 16                              |
| DUMMY | 1                               |
| FREQU | 80000.00 Hz                     |
| FLT   | 40000 Hz                        |
| DELAY | 5.00 usec                       |
| ACQTM | 0.4096 sec                      |
| PD    | 4.9500 sec                      |
| ADBIT | 16                              |
| RGAIN | 14                              |
| BF    | 0.10 Hz                         |
| T1    | 0.00                            |
| T2    | 0.00                            |
| T3    | 90.00                           |
| T4    | 100.00                          |
| EXMOD | NON                             |
| EXPCM | NON:Single.coupled:PW1_ACQTM_PC |
| IRNUC | 1H                              |
| IFR   | 399.65 MHz                      |
| IRSET | 124.00 KHz                      |
| IRFIN | 10500.00 Hz                     |
| IRRPW | 45 usec                         |
| IRATN | 511                             |
| DFILE | _DEFAULT.ALS                    |
| SF    | TH5ATFG2                        |
| LKSET | 61.60 KHz                       |
| LKFIN | 79.0 Hz                         |
| LKLEV | 180                             |
| LGAIN | 23                              |
| LKPHS | 250                             |
| LKSIG | 689                             |
| CSPED | 12 Hz                           |
| FILDC |                                 |
| FILDF |                                 |

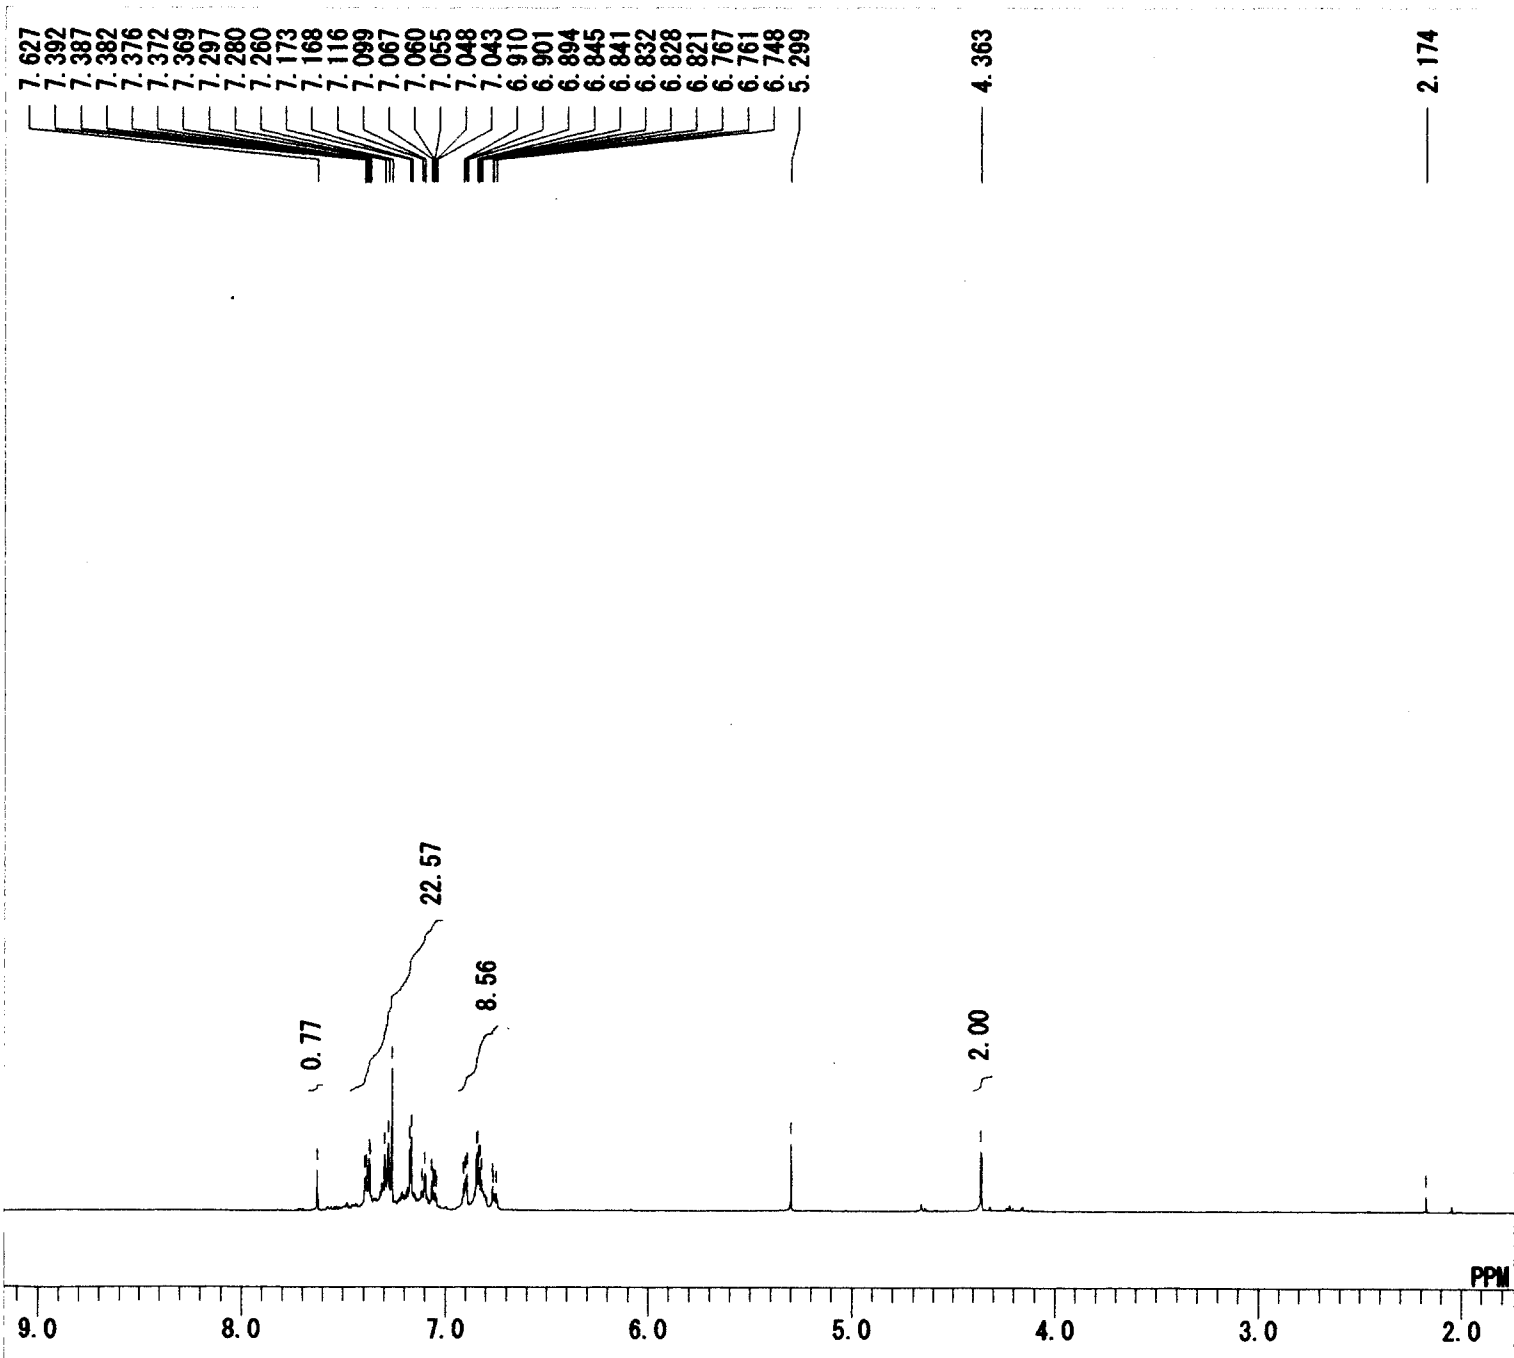

```

MENUF 1H
IRNUC 1H
OFR 399.65 MHz
OBSET 135.40 KHz
OBFIN 24.90 Hz
PW1 5.80 usec
DEADT 72.10 usec
PREDL 0.20000 msec
IWT 1.0000 msec
POINT 16384
SPO 16384
TIMES 8
DUMMY 1
FREQU 7992.01 Hz
FLT 4000 Hz
DELAY 50.00 usec
ACQTM 2.0501 sec
PD 4.9500 sec
ADBIT 16
RGAIN 18
BF 0.10 Hz
T1 0.00
T2 0.00
T3 90.00
T4 100.00
EXMOD NON
EXPCM NON:Single.coupled:PW1_ACQTM
IRNUC 1H
IFR 399.65 MHz
IRSET 136.90 KHz
IRFIN 97.50 Hz
IRRPW 45 usec
IRATN 511
DFILE product-diyne-PhPh-diPh-low-
SF TH5ATFG2
LKSET 61.60 KHz
LKFIN 79.0 Hz
LKLEV 180
LGAIN 22
LKPHS 250
LKSIG 703
CSPED 11 Hz
FILDC
FILDF

```

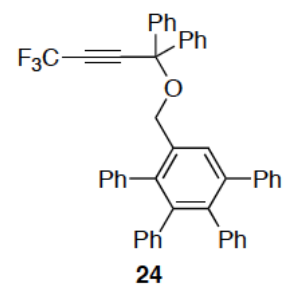

-50.506

MENUF 19F  
OBNUC 19F  
OFR 376.05 MHz  
OBSET 139.60 KHz  
OBF IN 36.10 Hz  
PW1 6.00 usec  
DEADT 10.00 usec  
PREDL 0.20000 msec  
IWT 1.0000 msec  
POINT 32768  
SPO 32768  
TIMES 16  
DUMMY 1  
FREQU 80000.00 Hz  
FLT 40000 Hz  
DELAY 5.00 usec  
ACQTM 0.4096 sec  
PD 4.9500 sec  
ADBIT 16  
RGAIN 14  
BF 0.10 Hz  
T1 0.00  
T2 0.00  
T3 90.00  
T4 100.00  
EXMOD NON  
EXPCM NON:Single.coupled:PW1\_ACQTM  
IRNUC 1H  
IFR 399.65 MHz  
IRSET 124.00 KHz  
IRFIN 10500.00 Hz  
IRRPW 45 usec  
IRATN 511  
DFILE product-diyne-PhPh-diPh-low-  
SF TH5ATFG2  
LKSET 61.60 KHz  
LKFIN 79.0 Hz  
LKLEV 180  
LGAIN 22  
LKPHS 250  
LKSIG 700  
CSPED 10 Hz  
FILDC  
FILDF

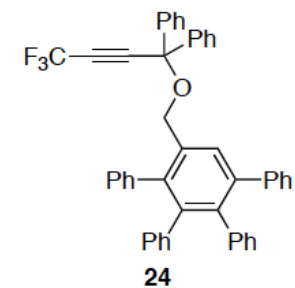

PPM

-47.0 -48.0 -49.0 -50.0 -51.0 -52.0 -53.0 -54.0 -55.0

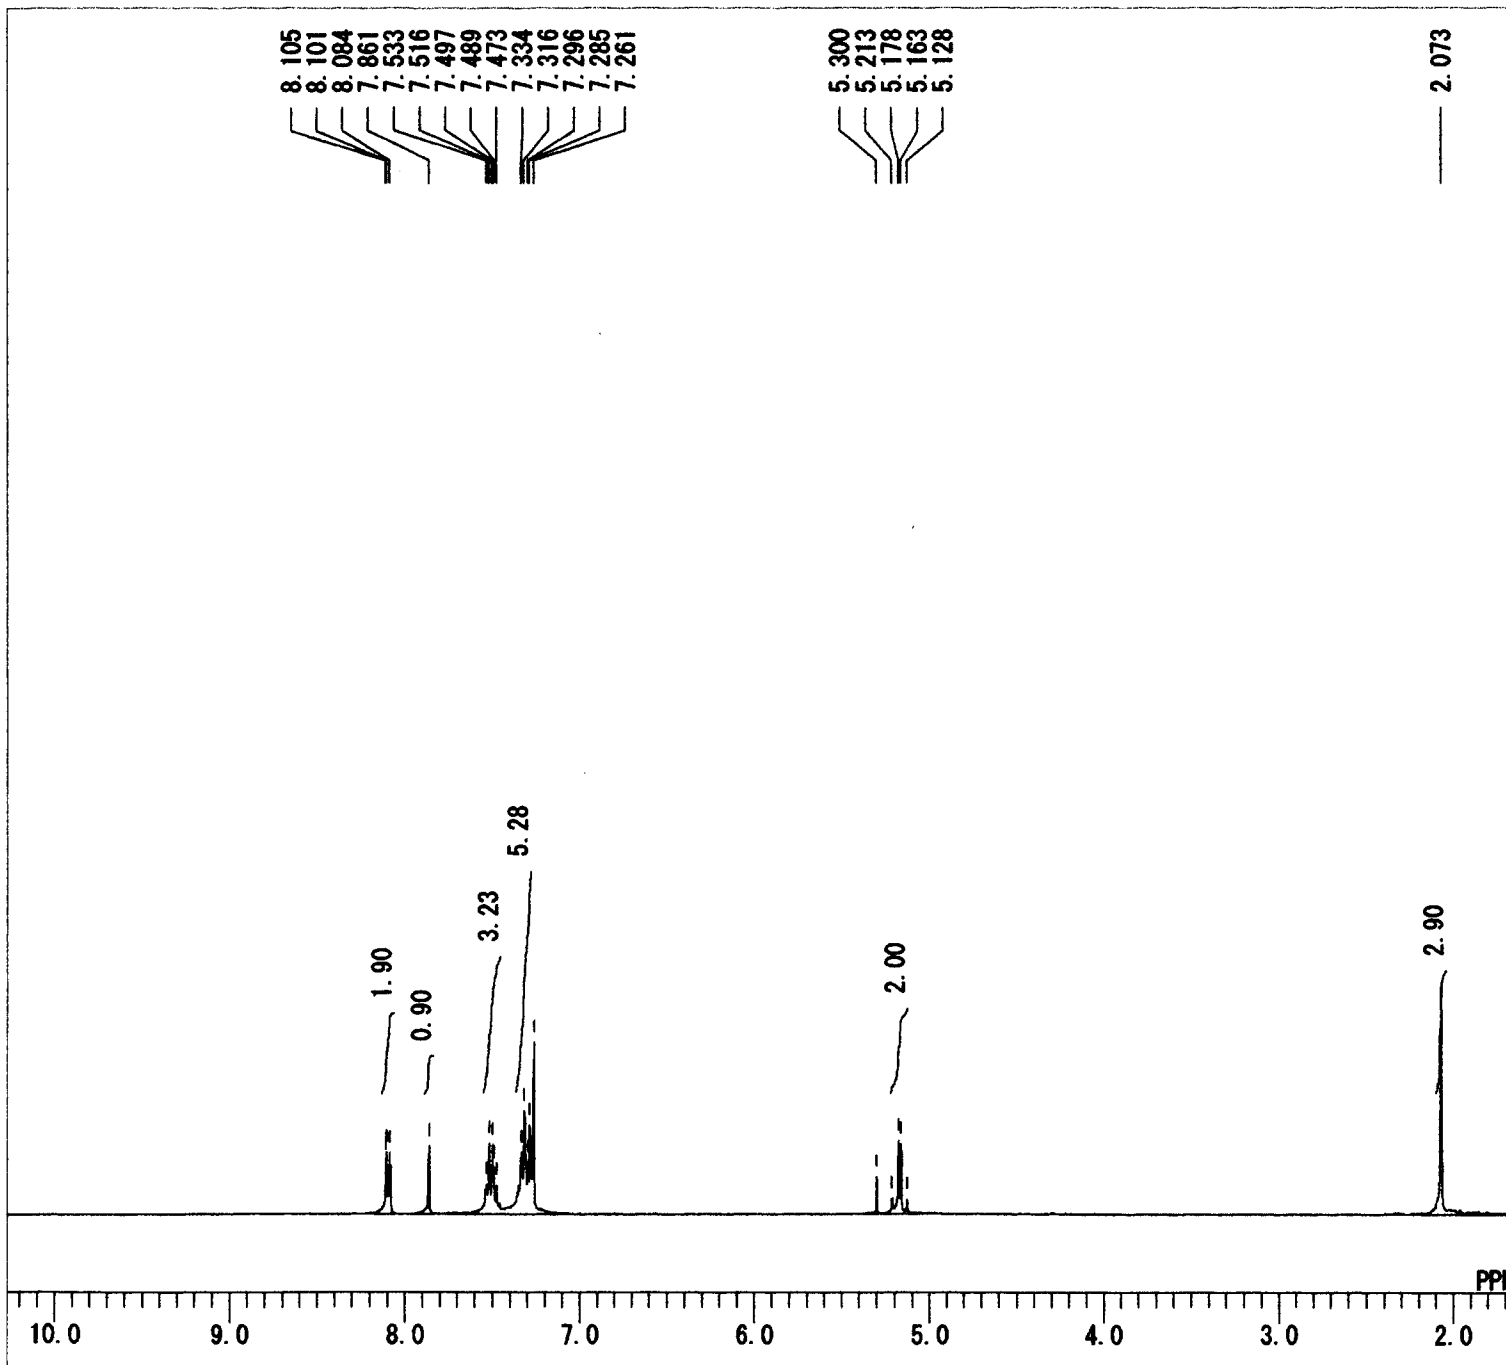

MENUF 1H  
 OBNUC 1H  
 OFR 399.65 MHz  
 OBSET 135.40 KHz  
 OBF IN 24.90 Hz  
 PW1 5.80 usec  
 DEADT 72.10 usec  
 PREDL 0.20000 msec  
 IWT 1.0000 msec  
 POINT 16384  
 SPO 16384  
 TIMES 8  
 DUMMY 1  
 FREQU 7992.01 Hz  
 FLT 4000 Hz  
 DELAY 50.00 usec  
 ACQTM 2.0501 sec  
 PD 4.9500 sec  
 ADBIT 16  
 RGAIN 19  
 BF 0.10 Hz  
 T1 0.00  
 T2 0.00  
 T3 90.00  
 T4 100.00  
 EXMOD NON  
 EXPCM NON:Single.coupled:PW1\_ACQTM  
 IRNUC 1H  
 IFR 399.65 MHz  
 IRSET 136.90 KHz  
 IRF IN 97.50 Hz  
 IRRPW 45 usec  
 IRATN 511  
 DFILE CF3-Diyne(PhMe)-H+PhCN-(1H).a  
 SF TH5ATFG2  
 LKSET 61.60 KHz  
 LKF IN 79.0 Hz  
 LKLEV 180  
 LGAIN 22  
 LKPHS 250  
 LKSIG 581  
 CSPED 10 Hz  
 FILDC  
 FILDF

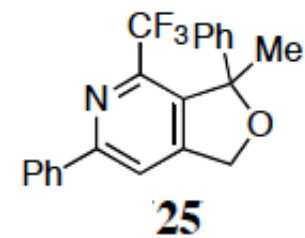

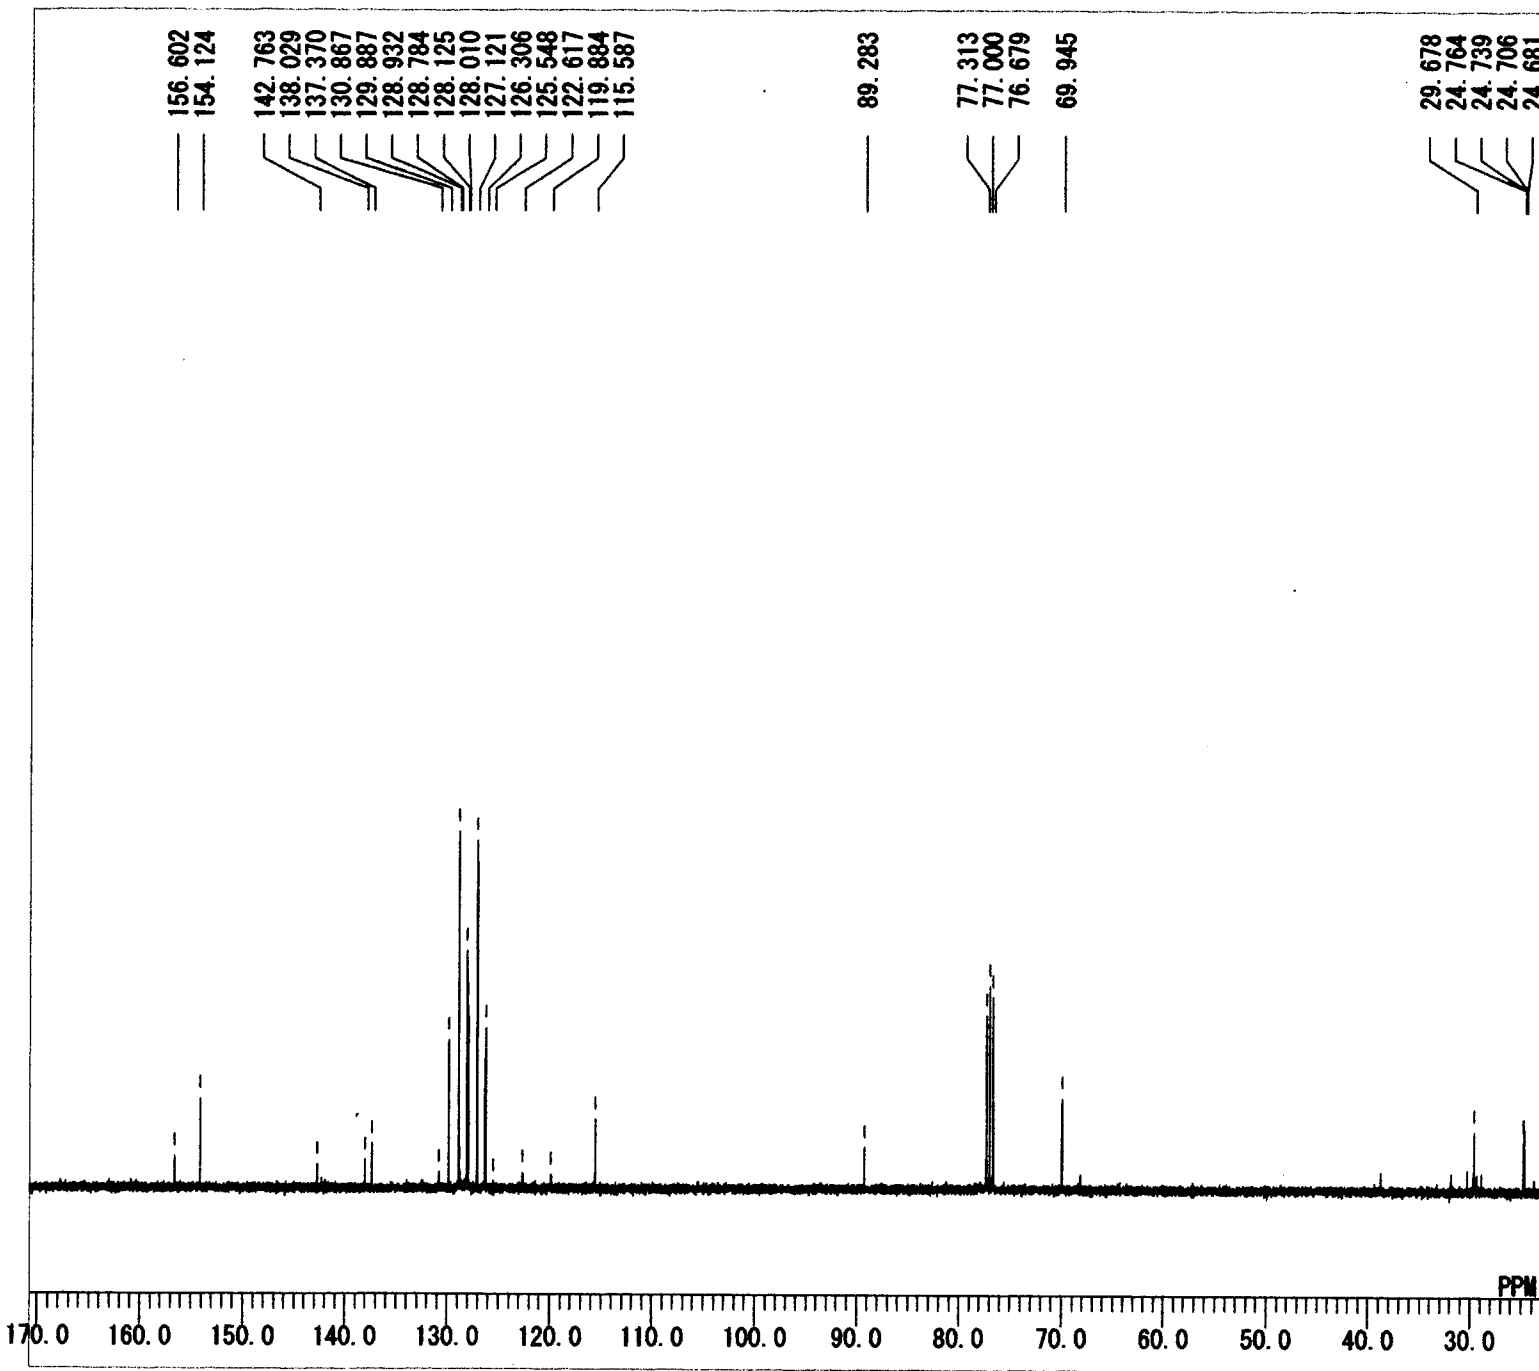

MENUF 13C  
 OBNUC 13C  
 OFR 100.40 MHz  
 OBSET 125.00 KHz  
 OFBIN 10500.00 Hz  
 PW1 6.00 usec  
 DEADT 19.10 usec  
 PREDL 0.20000 msec  
 IWT 1.0000 msec  
 POINT 32768  
 SPO 32768  
 TIMES 512  
 DUMMY 1  
 FREQU 27118.64 Hz  
 FLT 13550 Hz  
 DELAY 14.80 usec  
 ACQTM 1.2083 sec  
 PD 1.7920 sec  
 ADBIT 16  
 RGAIN 25  
 BF 0.10 Hz  
 T1 0.00  
 T2 0.00  
 T3 90.00  
 T4 100.00  
 EXMOD BCM  
 EXPCM Bilevel. complete. decoupling:  
 IRNUC 1H  
 IFR 399.65 MHz  
 IRSET 124.00 KHz  
 IRFIN 10500.00 Hz  
 IRRPW 45 usec  
 IRATN 511  
 DFILE CF3-Diyne (PhMe)-H-PhCN- (13C).  
 SF TH5ATFG2  
 LKSET 61.60 KHz  
 LKFIN 79.0 Hz  
 LKLEV 180  
 LGAIN 27  
 LKPHS 250  
 LKSIG 2809  
 GSPED 12 Hz  
 FILDC  
 FILDF

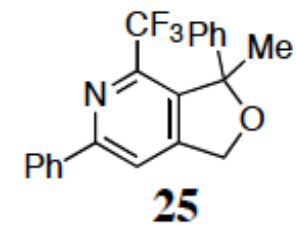

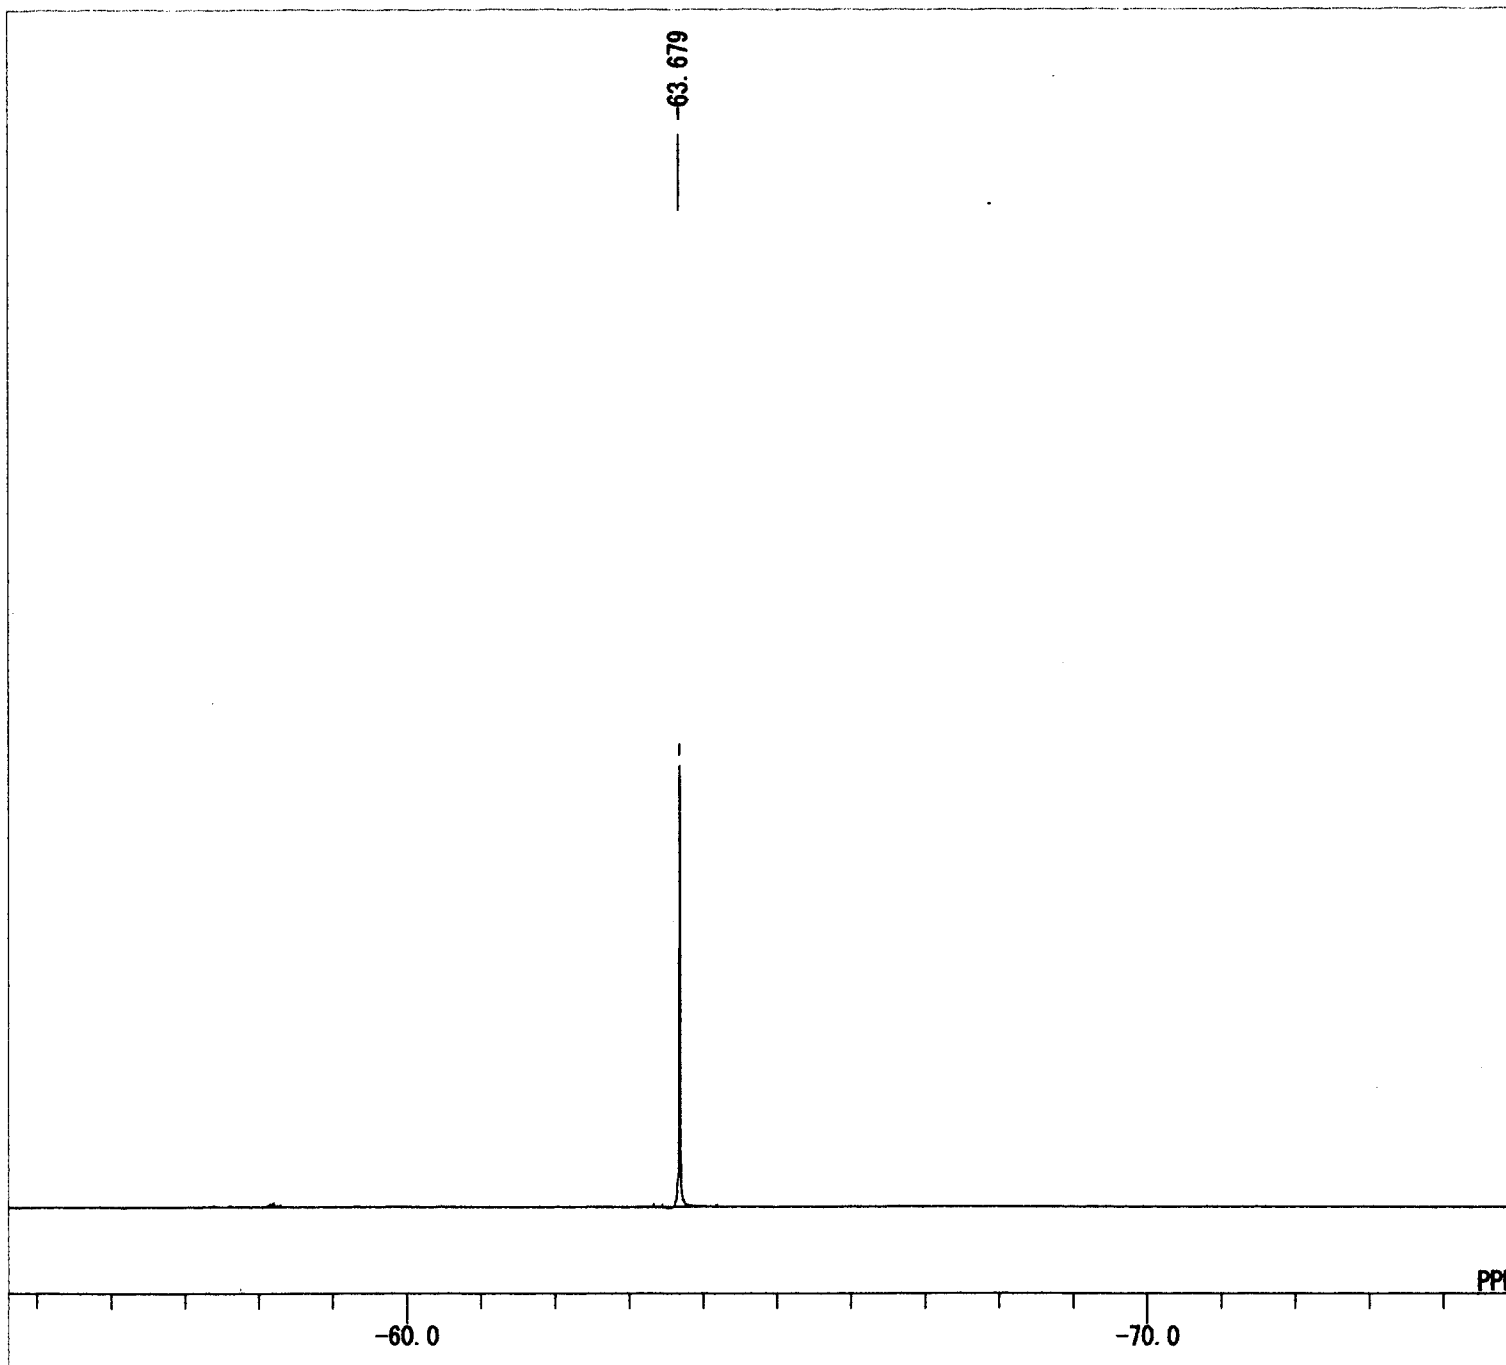

```

MENUF 19F
OBNUC 19F
OFR      376.05 MHz
OBSET    139.60 KHz
OBFIN    36.10 Hz
PW1      6.00 usec
DEADT    10.00 usec
PREDL    0.20000 msec
IWT      1.0000 msec
POINT    32768
SPO      32768
TIMES    16
DUMMY    1
FREQU    80000.00 Hz
FLT      40000 Hz
DELAY    5.00 usec
ACQTM    0.4096 sec
PD       4.9500 sec
ADBIT    16
RGAIN    14
BF       0.10 Hz
T1       0.00
T2       0.00
T3       90.00
T4       100.00
EXMOD    NON
EXPCM    NON:Single.coupled:PW1_ACQTM.
IRNUC    1H
IFR      399.65 MHz
IRSET    124.00 KHz
IRFIN    10500.00 Hz
IRRPW    45 usec
IRATN    511
DFILE    CF3-Diyne (PhMe)-H+PhCN-(19F).
SF       TH5ATFG2
LKSET    61.60 KHz
LKFIN    79.0 Hz
LKLEV    180
LGAIN    22
LKPHS    250
LKSIG    582
CSPED    10 Hz
FILDC
FILDF

```

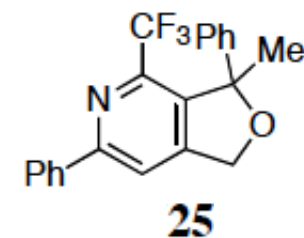



8.010  
7.990  
7.832  
7.358  
7.354  
7.338  
7.328  
7.319  
7.314  
7.310  
7.300  
7.294  
7.289  
7.279  
7.273  
7.263

5.300  
5.201  
5.166  
5.152  
5.117

2.436  
2.074

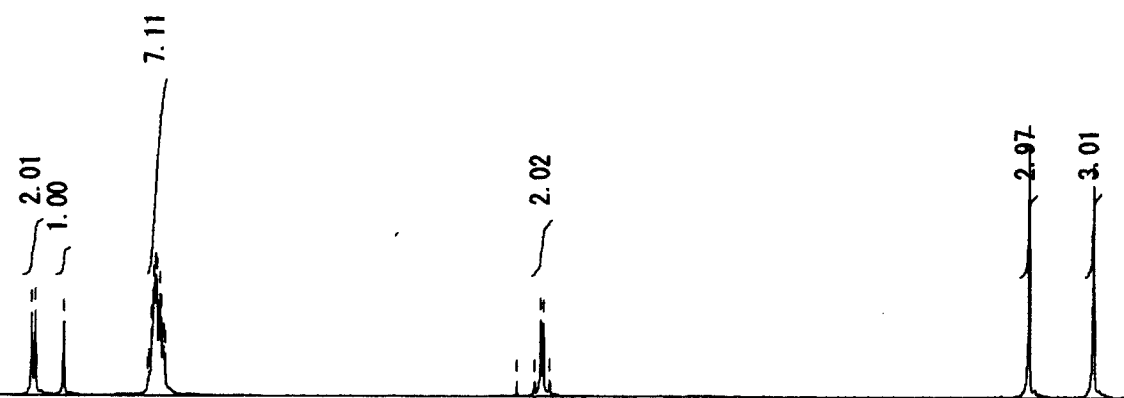

```

MENUF 1H
OBNUC 1H
OFR 399.65 MHz
OBSET 135.40 KHz
OBFIN 24.90 Hz
PW1 5.80 usec
DEADT 72.10 usec
PREDL 0.20000 msec
IWT 1.0000 msec
POINT 16384
SPO 16384
TIMES 8
DUMMY 1
FREQU 7992.01 Hz
FLT 4000 Hz
DELAY 50.00 usec
ACQTM 2.0501 sec
PD 4.9500 sec
ADBIT 16
RGAIN 14
BF 0.60 Hz
T1 0.00
T2 0.00
T3 90.00
T4 100.00
EXMOD NON
EXPCM NON:Single.coupled:PW1_ACQTM.
IRNUC 1H
IFR 399.65 MHz
IRSET 136.90 KHz
IRFIN 97.50 Hz
IRRPW 45 usec
IRATN 511
DFILE CF3-Diyne(PhMe)-H+ToICN-(1H).
SF TH5ATFG2
LKSET 61.60 KHz
LKFIN 79.0 Hz
LKLEV 180
LGAIN 22
LKPHS 250
LKSIG 633
CSPED 13 Hz
FILDC
FILDF
  
```

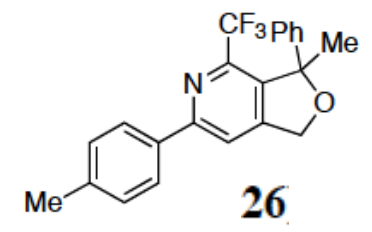

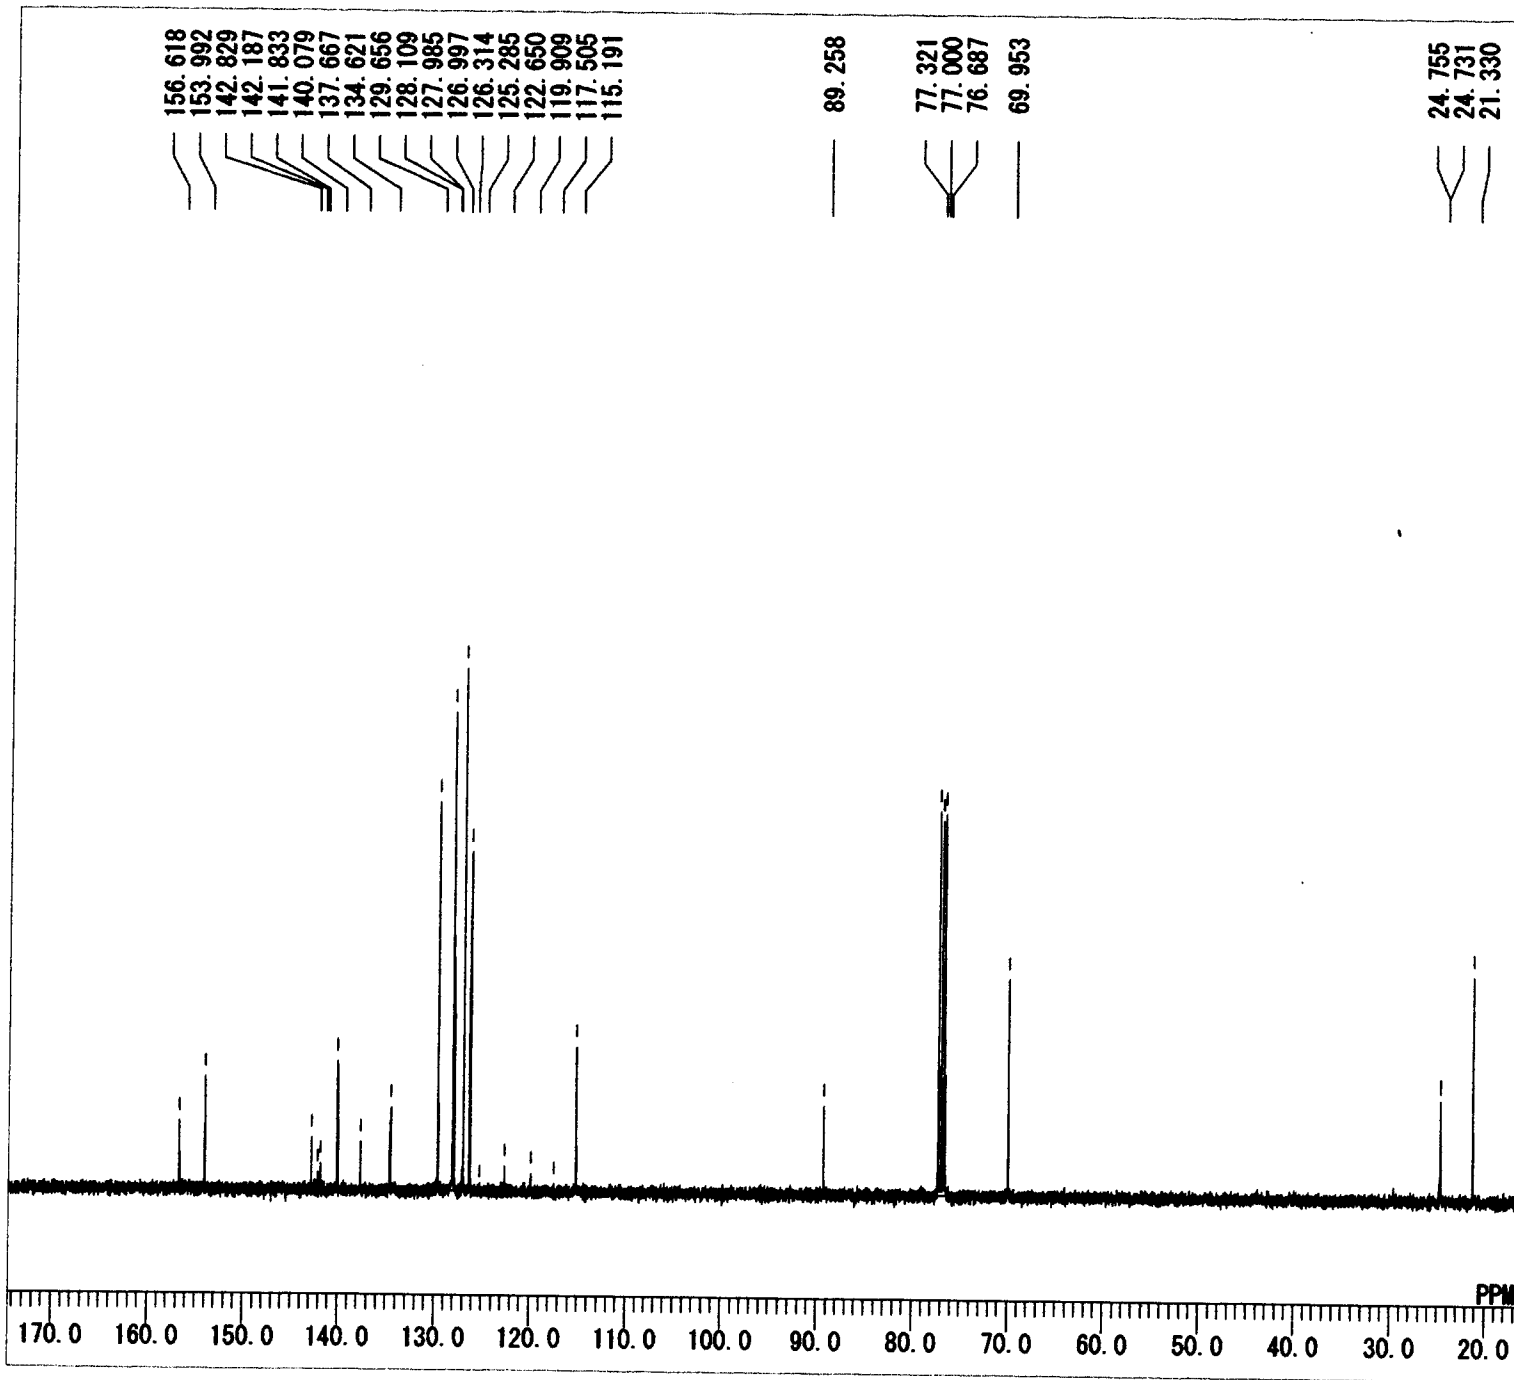

MENUF 13C  
 OBNUC 13C  
 OFR 100.40 MHz  
 OBSET 125.00 KHz  
 OBF IN 10500.00 Hz  
 PW1 6.00 usec  
 DEADT 19.10 usec  
 PREDL 0.20000 msec  
 IWT 1.0000 msec  
 POINT 32768  
 SPO 32768  
 TIMES 512  
 DUMMY 1  
 FREQU 27118.64 Hz  
 FLT 13550 Hz  
 DELAY 14.80 usec  
 ACQTM 1.2083 sec  
 PD 1.7920 sec  
 ADBIT 16  
 RGAIN 25  
 BF 0.60 Hz  
 T1 0.00  
 T2 0.00  
 T3 90.00  
 T4 100.00  
 EXMOD BCM  
 EXPCM Bilevel. complete. decoupling:  
 IRNUC 1H  
 IFR 399.65 MHz  
 IRSET 124.00 KHz  
 IRFIN 10500.00 Hz  
 IRRPW 45 usec  
 IRATN 511  
 DFILE CF3-Diyne (PhMe)-H+ToICN-(13C)  
 SF TH5ATFG2  
 LKSET 61.60 KHz  
 LKFIN 79.0 Hz  
 LKLEV 180  
 LGAIN 22  
 LKPHS 250  
 LKSIG 635  
 CSPED 14 Hz  
 FILDC  
 FILDF

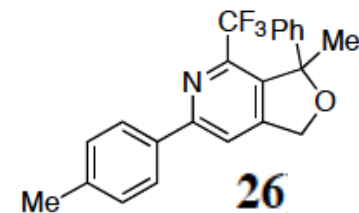

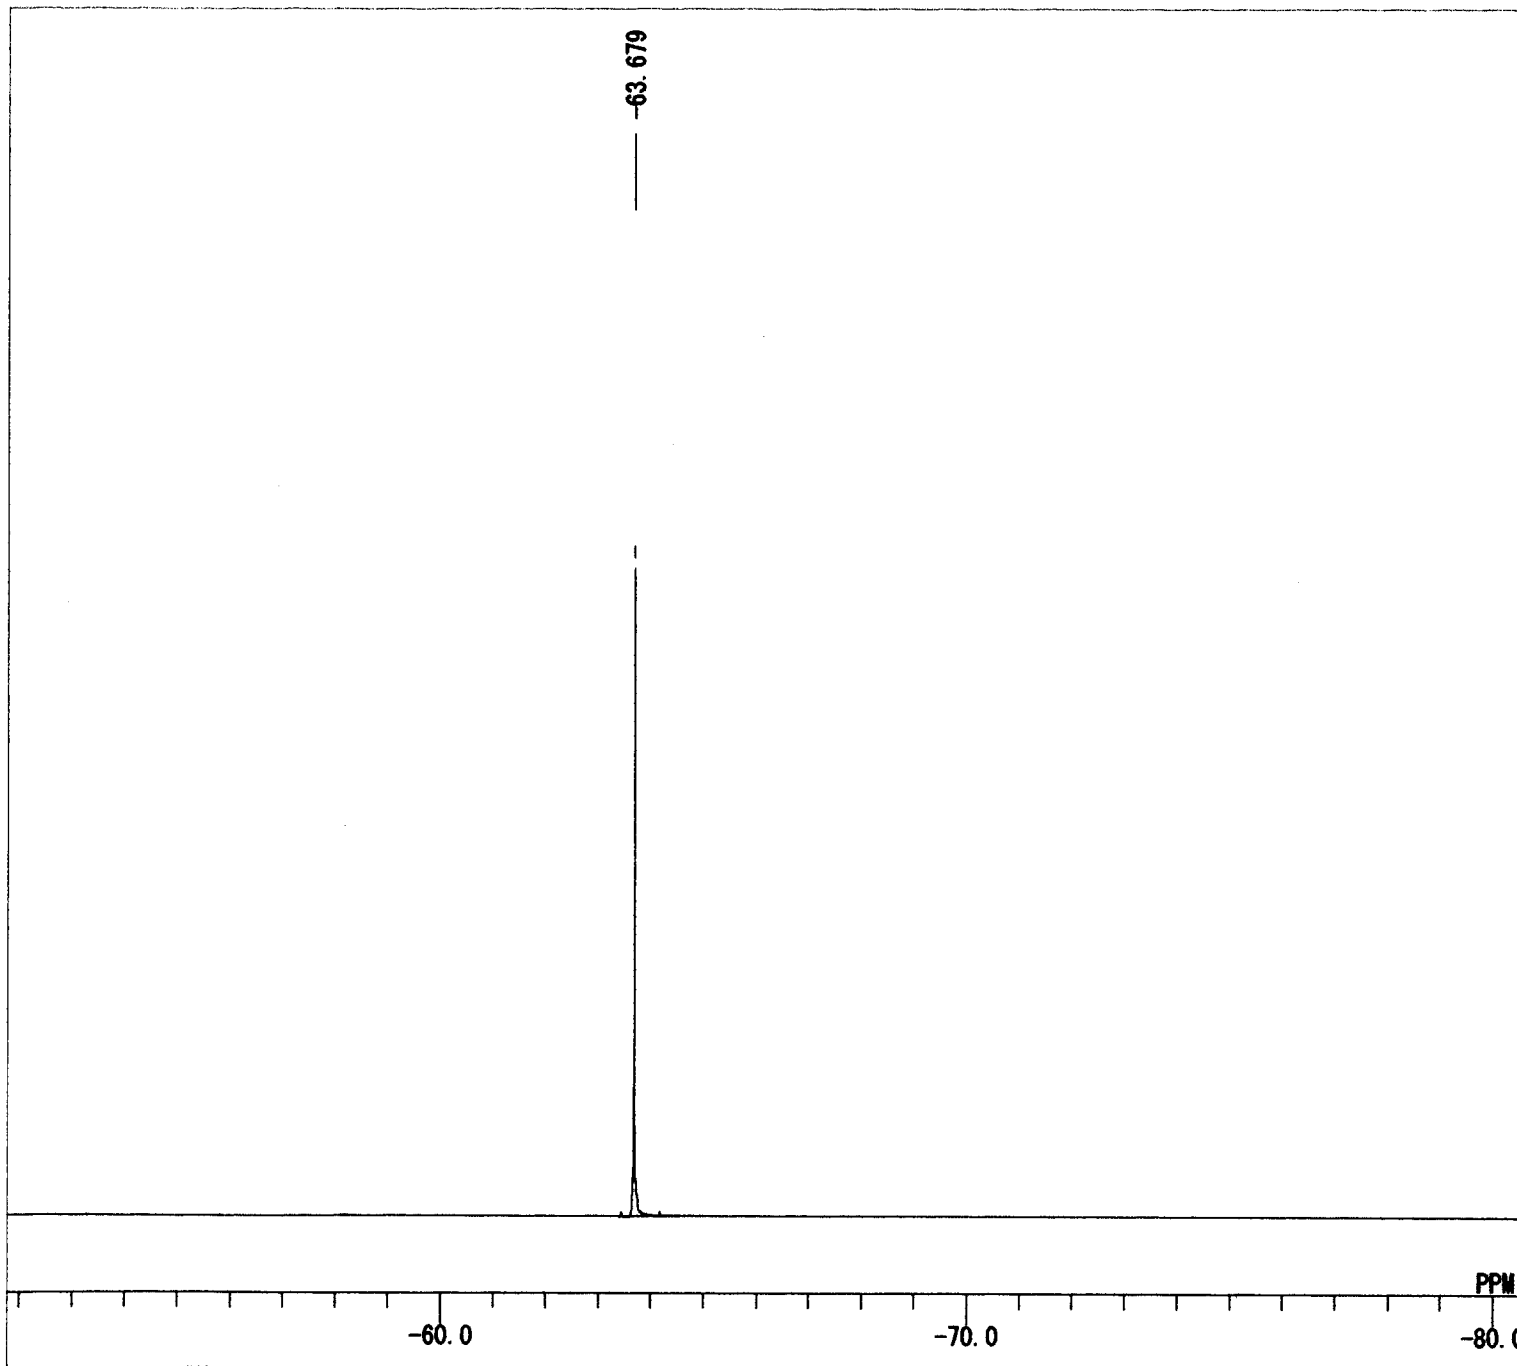

```

MNUF 19F
OBNUC 19F
OFR 376.05 MHz
OBSET 139.60 KHz
OBFIN 36.10 Hz
PW1 6.00 usec
DEADT 10.00 usec
PREDL 0.20000 msec
IWT 1.0000 msec
POINT 32768
SPO 32768
TIMES 16
DUMMY 1
FREQU 80000.00 Hz
FLT 40000 Hz
DELAY 5.00 usec
ACQTM 0.4096 sec
PD 4.9500 sec
ADBIT 16
RGAIN 14
BF 0.60 Hz
T1 0.00
T2 0.00
T3 90.00
T4 100.00
EXMOD NON
EXPCM NON:Single.coupled:PW1_ACQTM
IRNUC 1H
IFR 399.65 MHz
IRSET 124.00 KHz
IRFIN 10500.00 Hz
IRRPW 45 usec
IRATN 511
DFILE CF3-Diyne (PhMe)-H+ToICN-(19F)
SF TH5ATFG2
LKSET 61.60 KHz
LKFIN 79.0 Hz
LKLEV 180
LGAIN 22
LKPHS 250
LKSIG 634
CSPED 14 Hz
FILDC
FILDF

```

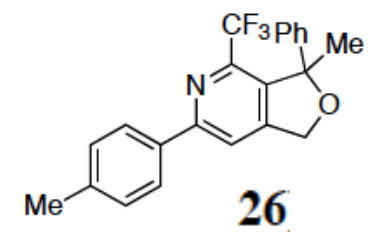

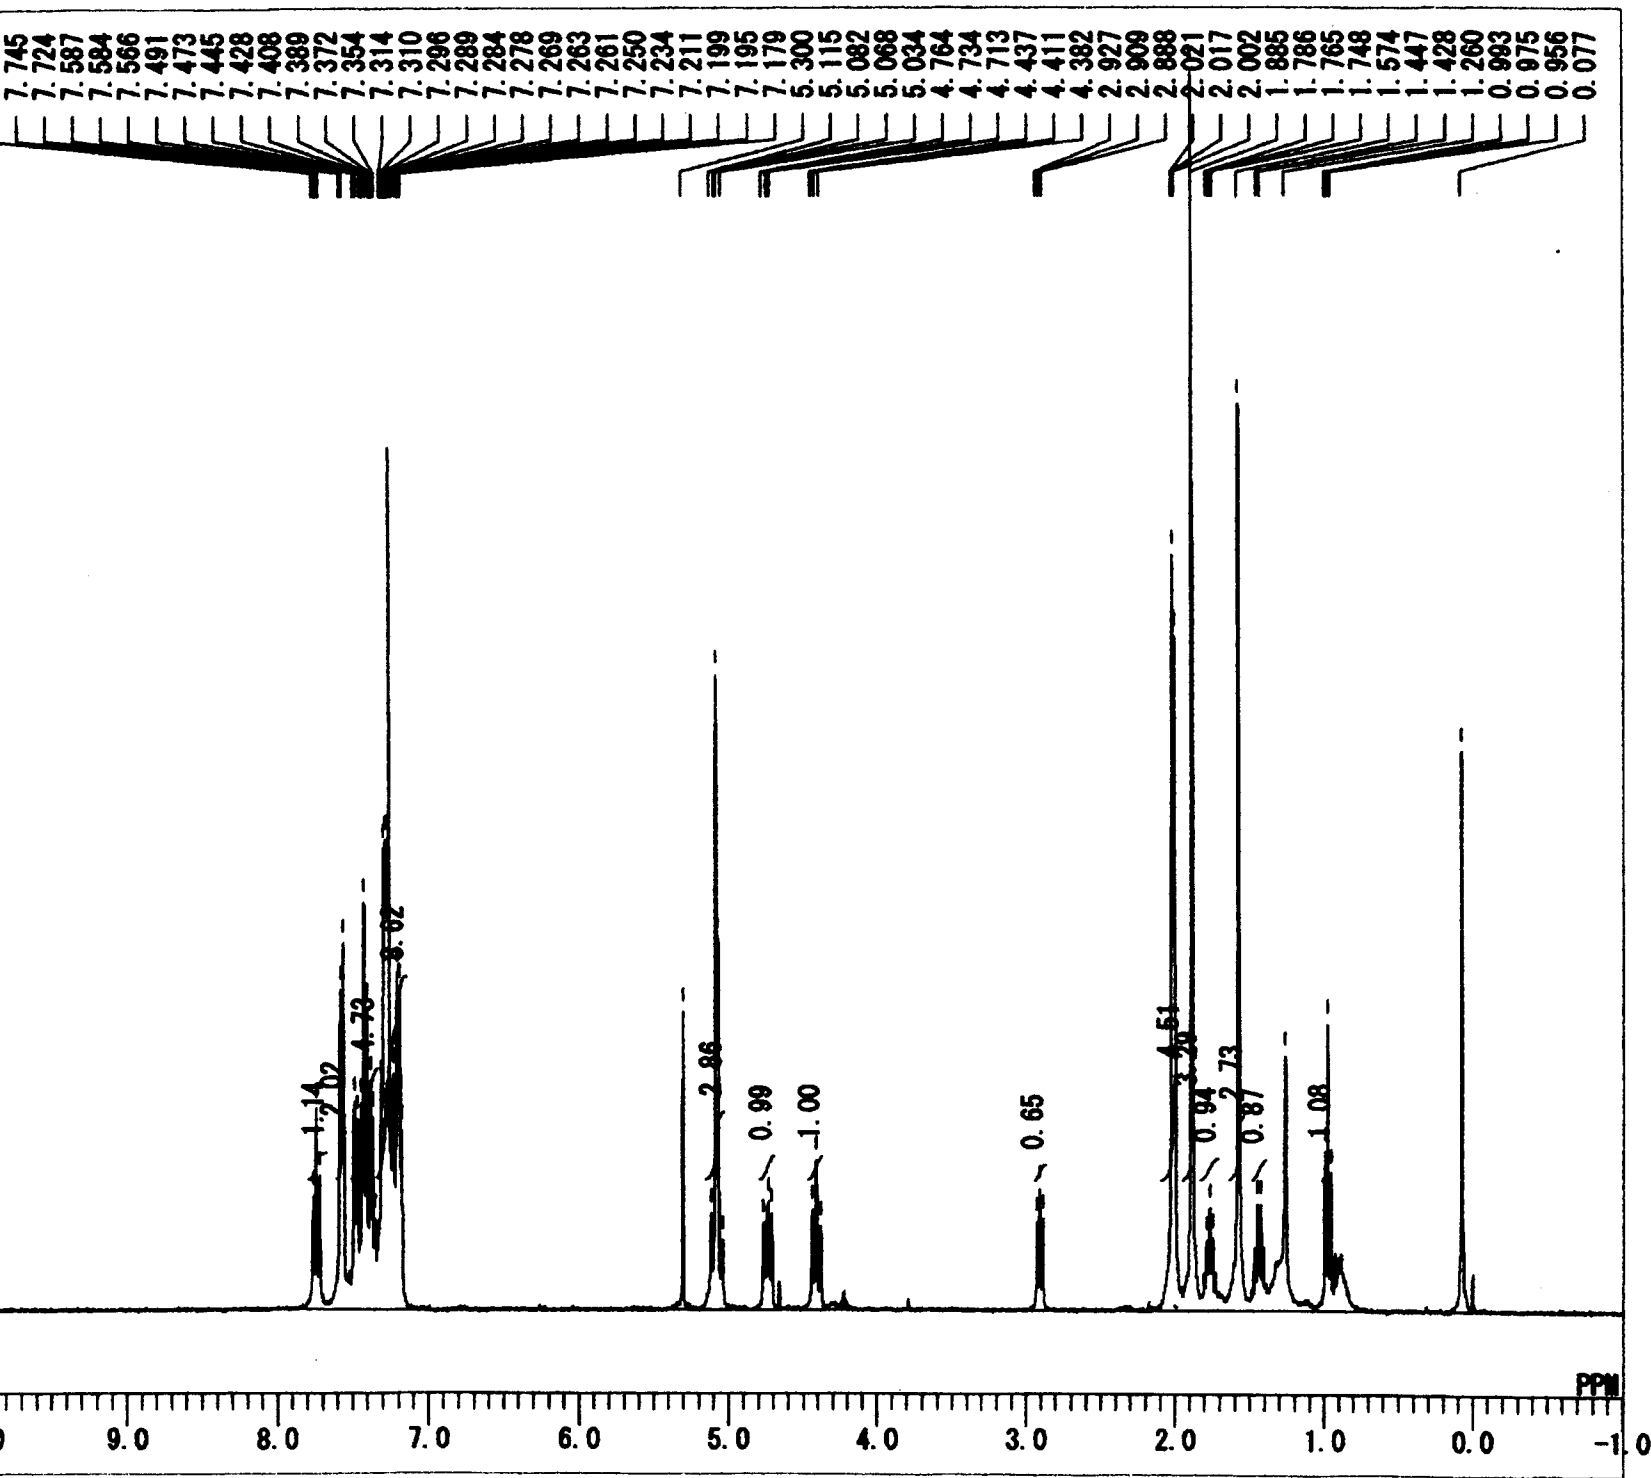

```

MENUF 1H
OBNUC 1H
OFR 399.65 MHz
OBSET 135.40 KHz
OBFIN 24.90 Hz
PW1 5.80 usec
DEADT 72.10 usec
PREDL 0.20000 msec
IWT 1.0000 msec
POINT 16384
SPO 16384
TIMES 8
DUMMY 1
FREQU 7992.01 Hz
FLT 4000 Hz
DELAY 50.00 usec
ACQTM 2.0501 sec
PD 4.9500 sec
ADBIT 16
RGAIN 17
BF 0.10 Hz
T1 0.00
T2 0.00
T3 90.00
T4 100.00
EXMOD NON
EXPCM NON: Single. coupled: PW1_ACQ
IRNUC 1H
IFR 399.65 MHz
IRSET 136.90 KHz
IRFIN 97.50 Hz
IRRPW 45 usec
IRATN 511
DFILE _DEFAULT.ALS
SF TH5ATFG2
LKSET 61.60 KHz
LKFIN 79.0 Hz
LKLEV 180
LGAIN 25
LKPHS 250
LKSIG 1382
CSPED 14 Hz
FILDC
FILDF

```

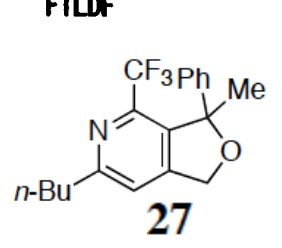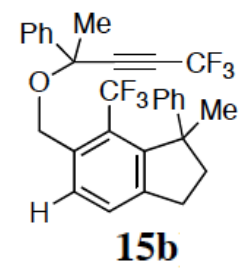

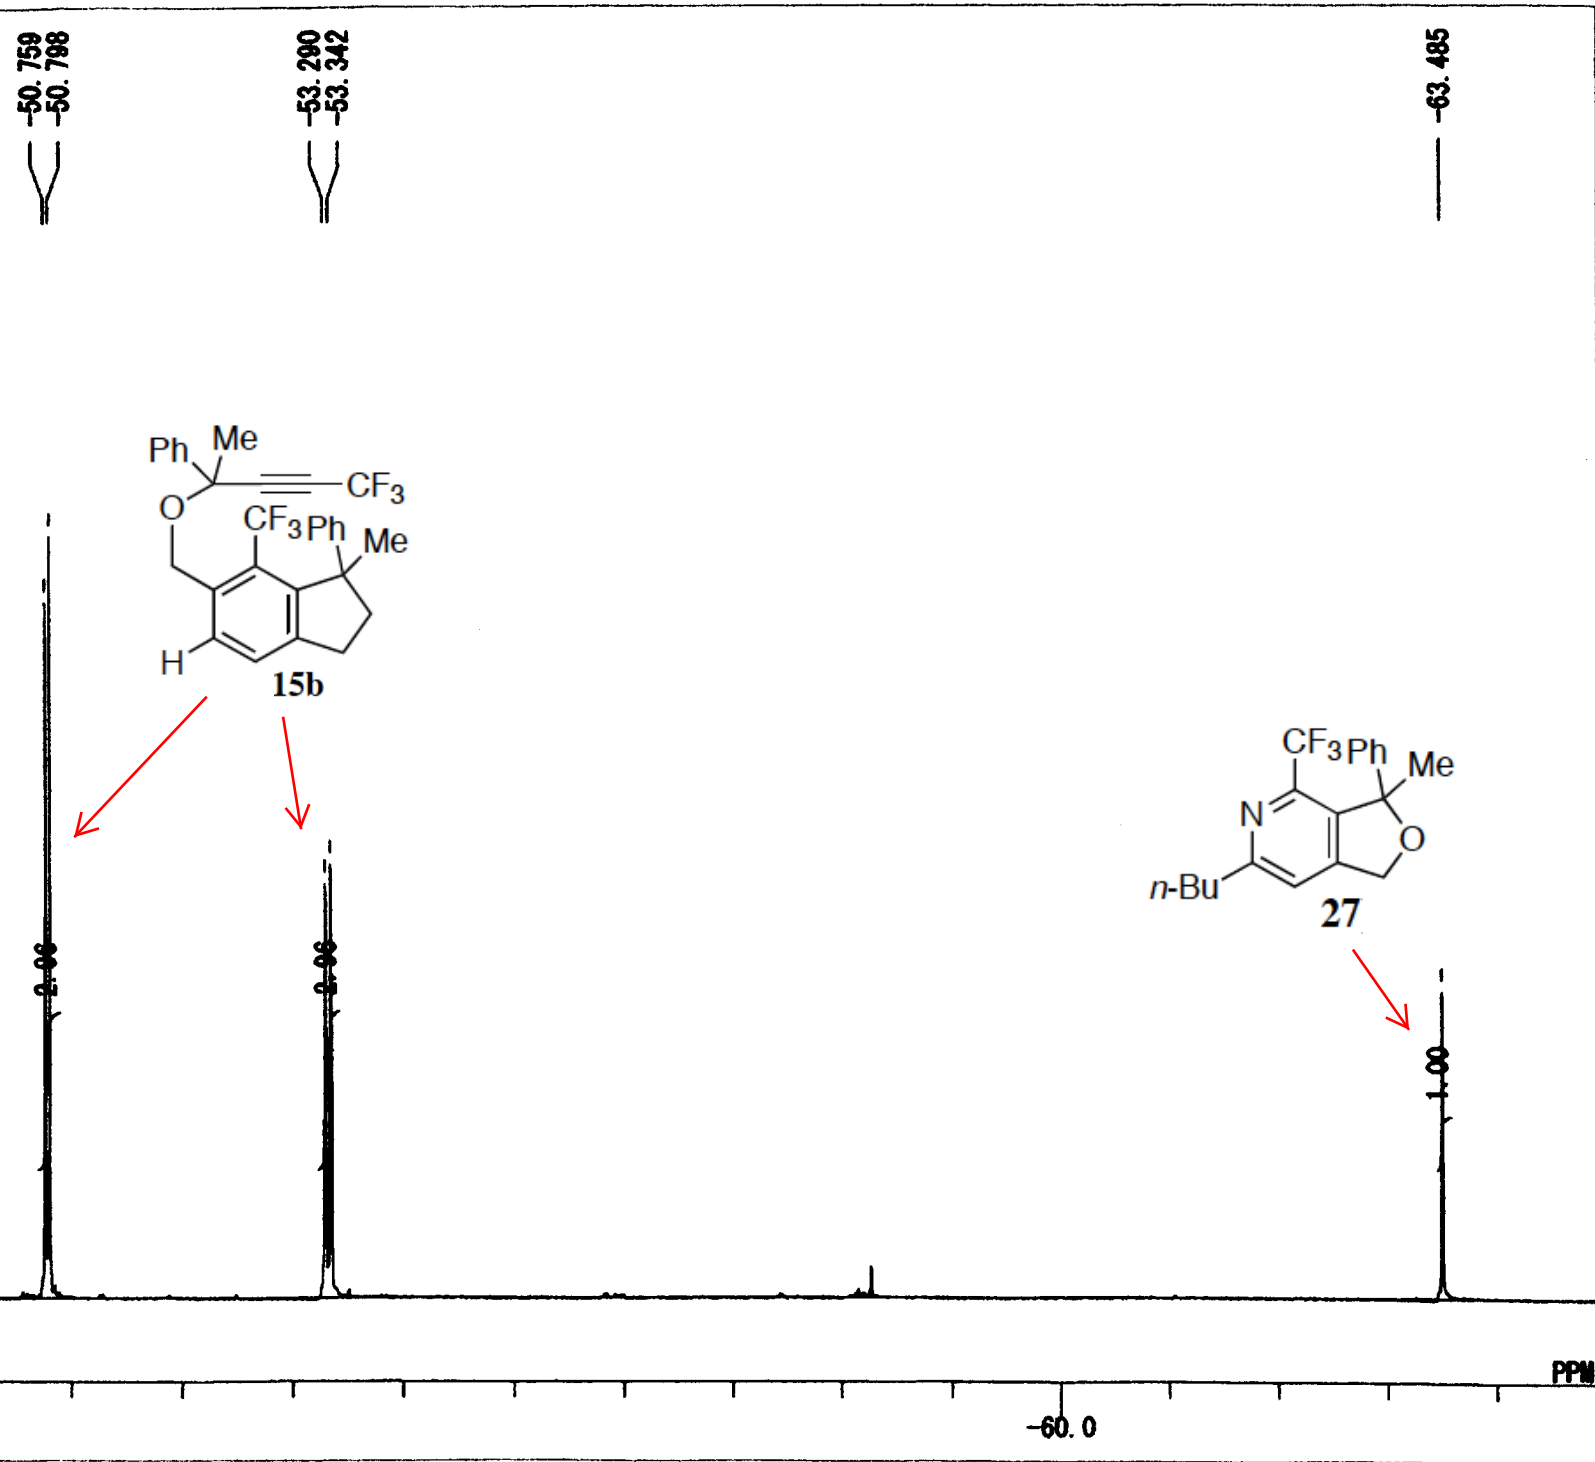

|       |                            |
|-------|----------------------------|
| MENUF | 19F                        |
| OBNUC | 19F                        |
| OFR   | 376.05 MHz                 |
| OBSET | 139.60 KHz                 |
| OBFIN | 36.10 Hz                   |
| PW1   | 6.00 usec                  |
| DEADT | 10.00 usec                 |
| PREDL | 0.20000 msec               |
| IWT   | 1.0000 msec                |
| POINT | 32768                      |
| SPO   | 32768                      |
| TIMES | 16                         |
| DUMMY | 1                          |
| FREQU | 80000.00 Hz                |
| FLT   | 40000 Hz                   |
| DELAY | 5.00 usec                  |
| ACQTM | 0.4096 sec                 |
| PD    | 4.9500 sec                 |
| ADBIT | 16                         |
| RGAIN | 14                         |
| BF    | 0.10 Hz                    |
| T1    | 0.00                       |
| T2    | 0.00                       |
| T3    | 90.00                      |
| T4    | 100.00                     |
| EXMOD | NON                        |
| EXPCM | NON:Single.coupled:PW1_ACO |
| IRNUC | 1H                         |
| IFR   | 399.65 MHz                 |
| IRSET | 124.00 KHz                 |
| IRFIN | 10500.00 Hz                |
| IRRPW | 45 usec                    |
| IRATN | 511                        |
| DFILE | DEFAULT.ALS                |
| SF    | TH5ATFG2                   |
| LKSET | 61.60 KHz                  |
| LKFIN | 79.0 Hz                    |
| LKLEV | 180                        |
| LGAIN | 25                         |
| LKPHS | 250                        |
| LKSIG | 1401                       |
| CSPED | 14 Hz                      |
| FILDC |                            |
| FILDF |                            |

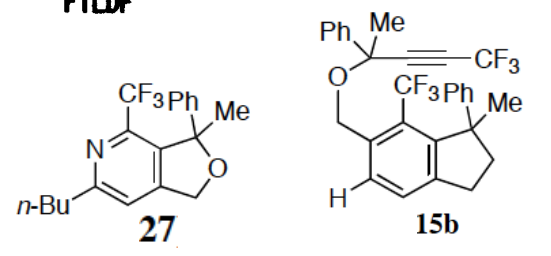

# Determination of the structure of the compound (NOESY spectrum)

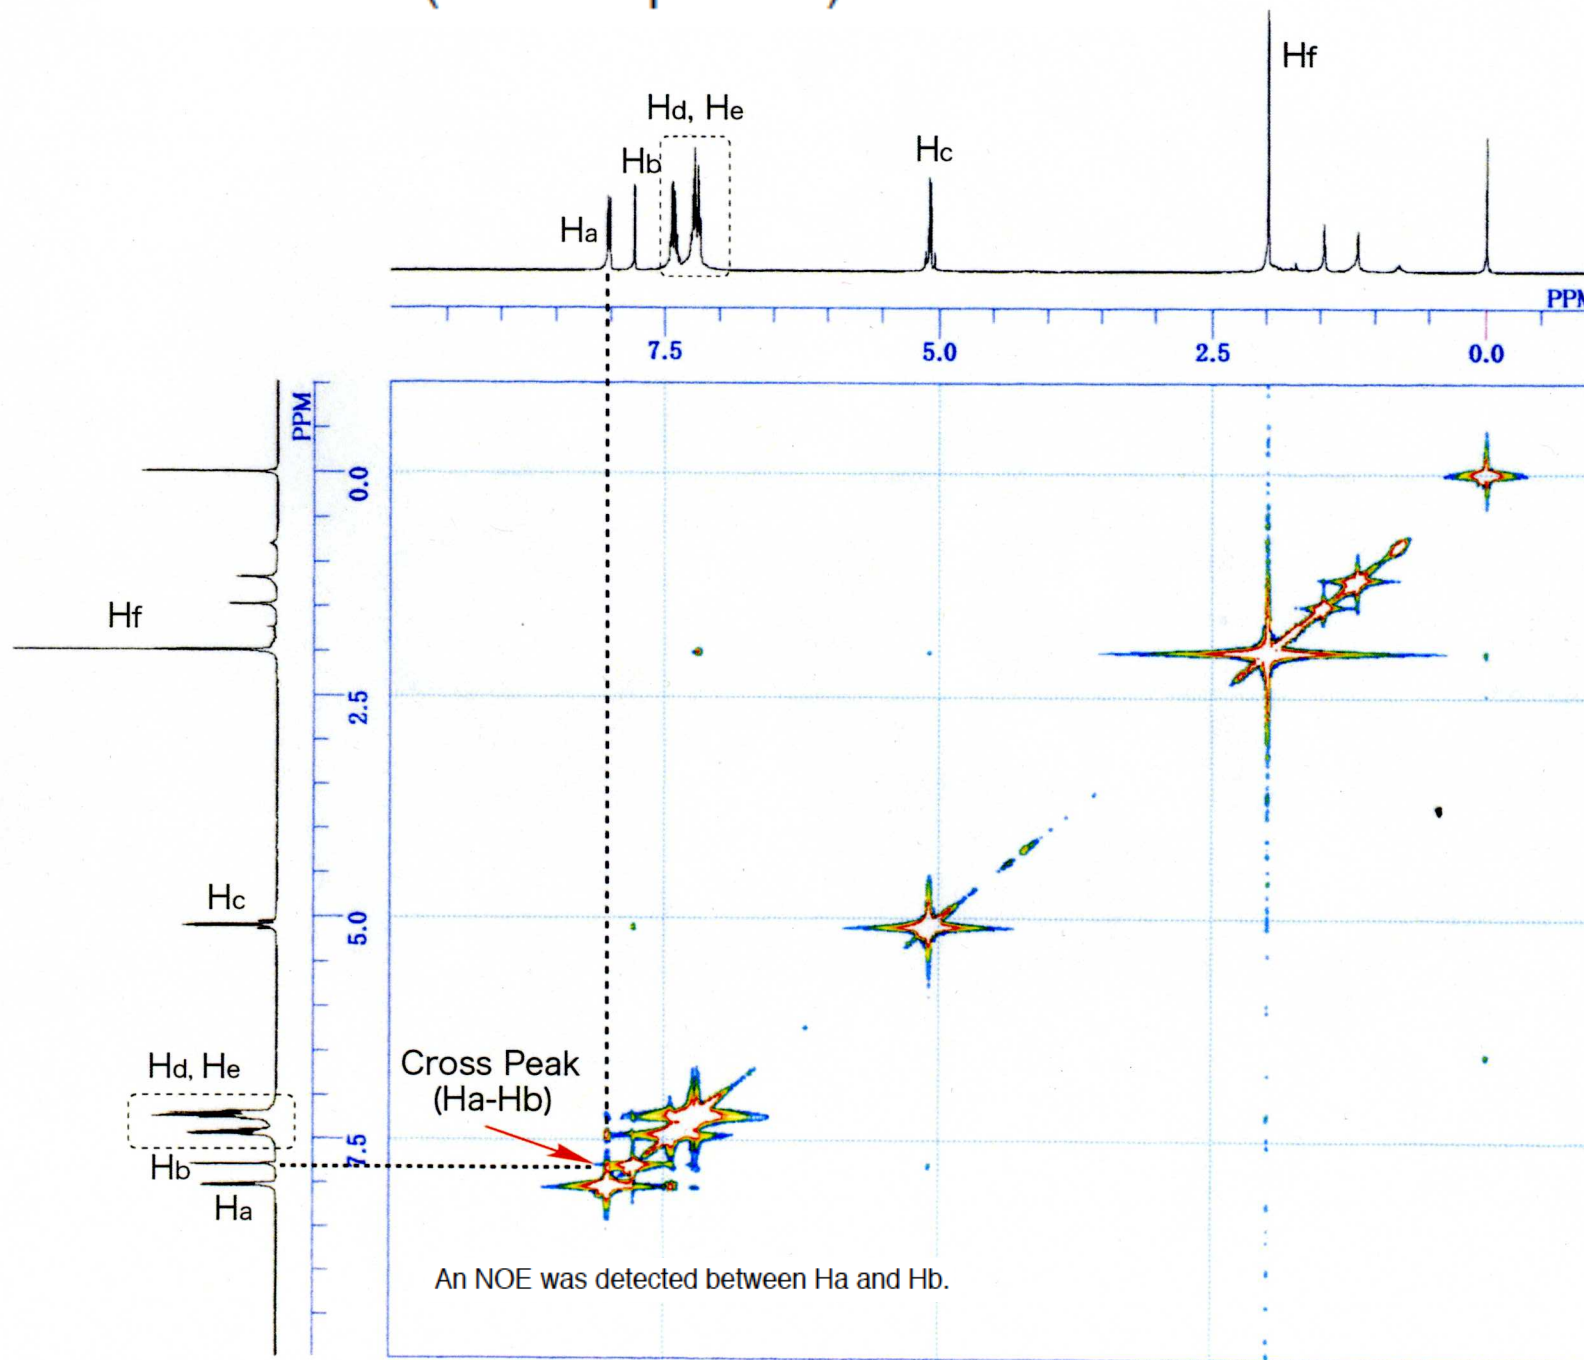

```

DFILE      _DEFAULT.ALS
COMNT      product-diyne-PhMe-Ph
DATIM      Wed Sep 09 07:17:07 20
EXMOD      VNOENH
OBNUC      1H
OBFRQ      399.65 MHz
OBSET      134.30 KHz
OBFIN      36.60 Hz
POINT      2048
FREQU      4398.02 Hz
CLPNT      256
TODAT      256
CLFRQ      4405.29 Hz
SCANS      64
ACQTM      0.1164 sec
PD         1.5000 sec
PW1        11.60 usec
PW2        10.00 usec
PW3        10.00 usec
PI1        0.2270 msec
PI2        0.2270 msec
PI3        500.0000 msec
IRNUC      1H
CTEMP      22.0 c
SLVNT      CDCL3
EXREF      0.00 ppm
CLEXR      0.00
RGAIN      17
OBATN      511
LOOP1      1000
    
```

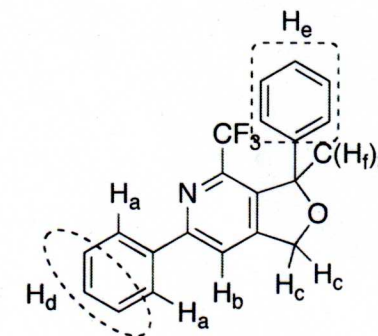

Supplement: b926192c.pdf [file b926192c.pdf]
